# Supplementary material
Source: PubMed Central journal article supplement (PMC2880463)
Supplement: NIHMS191220-supplement-1_si_001.pdf [file NIHMS191220-supplement-1_si_001.pdf]

# Enantioselective Polyene Cyclization via Organo-SOMO Catalysis

Sebastian Rendler and David W. C. MacMillan\*

*Merck Center for Catalysis at Princeton University, Princeton, New Jersey 08544*

[dmacmill@princeton.edu](mailto:dmacmill@princeton.edu)

## Supporting Information

### Contents

|                                                           |     |
|-----------------------------------------------------------|-----|
| 1 General Information                                     | S2  |
| 2 General Procedure for Enantioselective Polycyclizations | S3  |
| 3 Experimental Details for Polycyclization Products       | S4  |
| 4 Preparation of Cyclization Precursors                   | S16 |
| 5 X-ray Crystallographic Proof of Stereochemistry         | S73 |

## 1 General Information

Commercial reagents were purified prior to use following the guidelines of Perrin and Armarego.<sup>1</sup> Reagents and solvents for enantioselective polycyclizations were purified prior to use by the following procedures:

- Copper(II) trifluoromethanesulfonate (Cu(OTf)<sub>2</sub>) was purchased from Acros Organics and purified by dissolution in dry MeCN, filtration in order to remove insoluble residuals, followed by precipitation with Et<sub>2</sub>O and crystallization at -18 °C. The obtained crystalline solid was dried under high vacuum at 150 °C to give a white powder that was stored and handled in a glove box.
- Sodium trifluoroacetate (NaTFA, Alfa Aesar) was dried under high vacuum at 150 °C prior to use and stored and handled in a glove box.
- Trifluoroacetic acid (>99%, Reagent Plus<sup>®</sup>) was purchased from Sigma-Aldrich and used as obtained. All solvents were purified according to the method of Grubbs.<sup>2</sup>
- Isobutyronitrile (*i*-PrCN, Reagent grade, Sigma-Aldrich) and 1,2-Dimethoxyethane (DME, Reagent grade, Sigma-Aldrich) were distilled from CaH<sub>2</sub>, degassed following the *freeze-pump-thaw* technique (3 ×) and stored under an argon atmosphere.

Organic solutions were concentrated under reduced pressure on a Büchi rotary evaporator. Chromatographic purification of products was accomplished using force-flow chromatography on Silicycle silica gel according to the method of Still.<sup>3</sup> Thin-layer chromatography (TLC) was performed on Silicycle 250 µm silica gel plates. Visualization of the developed chromatogram was performed by fluorescence quenching or Ceric ammonium molybdate stain.

<sup>1</sup>H and <sup>13</sup>C NMR spectra were recorded on a Bruker Avance III (500 MHz) spectrometer and are internally referenced to residual protio solvent signals (note: CDCl<sub>3</sub> referenced at δ 7.26 ppm for <sup>1</sup>H and δ 77.1 ppm for <sup>13</sup>C). Data for <sup>1</sup>H NMR are reported as follows: chemical shift (δ ppm), multiplicity (s = singlet, d = doublet, t = triplet, q = quartet, p = pentet, dd = doublet of doublets, ddd = doublet of doublet of doublets and m = multiplet), integration, coupling constant (Hz) and assignment. Assignments of <sup>1</sup>H NMR signals were aided by 2D NMR data sets (COSY,

- 
- (1) Perrin, D. D.; Armarego, W. L. F. *Purification of Laboratory Chemicals*; 3<sup>rd</sup> ed., Pergamon Press, Oxford, 1988.
  - (2) Pangborn, A. B.; Giardello, M. A.; Grubbs, R. H.; Rosen, R. K.; Timmers, F. J. *Organometallics*, **1996**, *15*, 1518.
  - (3) Still, W. C.; Kahn, M.; Mitra, A. *J. Org. Chem.* **1978**, *43*, 2923.

HSQC, HMBC, and 2D NOESY correlation). Structures with numbering are for NMR assignments and do not necessarily conform with the given chemical name. Data for  $^{13}\text{C}$  NMR are reported in terms of chemical shift ( $\delta$  ppm). IR spectra were recorded on a Perkin Elmer Paragon 1000 spectrometer and are reported in terms of frequency of absorption ( $\text{cm}^{-1}$ ). High Resolution Mass spectra were obtained from the Princeton University mass spectral facility on an Agilent 1200 ESI-TOF instrument. High pressure liquid chromatography (HPLC) was performed on a Hewlett-Packard 1100 Series chromatograph using Daicel Chiralcell chiral columns (25 cm) and guard column (5 cm) as noted for each compound (OD-H, OJ-H, and AS-H columns). Supercritical fluid chromatography (SFC) analyses were obtained from Lotus Separations, LLC, Princeton, NJ. Optical rotations were measured on a Jasco P-1010 polarimeter with  $[\alpha]_{\text{D}}$  values reported in  $10^{-1}$  ( $^{\circ} \text{cm}^2 \text{g}^{-1}$ ); concentration (c) is in g/100 mL.

## 2 General Procedure for Enantioselective Polycyclizations (GP1)

An oven-dried 8-dram vial (10 mL) equipped with a magnetic stir bar was charged with catalyst **2b**·TFA (24.6 mg, 0.0600 mmol, 0.300 equiv). After sealing with a rubber septum and subsequent evacuation and backfilling with argon (3  $\times$ ), the catalyst was dissolved in dry, degassed *i*-PrCN (0.5 mL). A solution of the cyclization precursor (0.200 mmol, 1.00 equiv) in DME (1.0 mL) was added via syringe. Shortly thereafter, the oxidant solution was added dropwise via syringe using a syringe pump within 7 h at room temperature followed by further 17 h of stirring at the same temperature.

The required oxidant solution was freshly prepared as follows: In a glove box, an oven-dried 8-dram vial equipped with a stir bar was charged with  $\text{Cu}(\text{OTf})_2$  (181 mg, 0.500 mmol, 2.50 equiv) and sodium trifluoroacetate (54.4 mg, 0.400 mmol, 2.00 equiv), and sealed with a rubber septum. After removal from the glove box, the vial was placed on a magnetic stir plate and connected to an argon inlet. Sequential addition of dry, degassed *i*-PrCN (1.0 mL) and TFA (45  $\mu\text{L}$ , 0.40 mmol, 2.0 equiv) resulted in a blue-green solution upon stirring for 5 min.

At the end of the indicated reaction time, a light-green solution had been formed that was poured onto a mixture of 2M  $\text{NH}_4\text{OH}$  (15 mL) and brine (5 mL), and extracted with  $\text{Et}_2\text{O}$ , EtOAc or  $\text{CHCl}_3$  (as indicated below, 4  $\times$  10 mL). The combined organic layers were washed with brine (10 mL), dried over  $\text{MgSO}_4$ , and concentrated *in vacuo*. Purification by flash column

chromatography on silica gel using solvent mixtures as specified below afforded the cyclization products in analytically pure form.

### 3 Experimental Data for Polycyclization Products

#### 3.1 Bicyclization to Give Aldehyde **7** (Table 2)

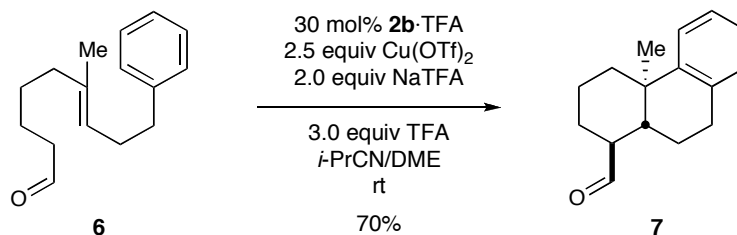

According to GP1, aldehyde **6** (46.1 mg, 0.200 mmol, 1.00 equiv) was subjected to catalyst catalyst **2b**-TFA (24.6 mg, 0.0600 mmol, 0.300 equiv),  $\text{Cu}(\text{OTf})_2$  (181 mg, 0.500 mmol, 2.50 equiv), sodium trifluoroacetate (54.4 mg, 0.400 mmol, 2.00 equiv), and TFA (45  $\mu\text{L}$ , 0.40 mmol, 2.0 equiv). Aqueous work-up using  $\text{Et}_2\text{O}$  as a solvent and flash chromatography (1.5% EtOAc/hexanes) furnished title compound **7** (32 mg, 70% yield) as a white solid. IR (ATR)  $\nu$  ( $\text{cm}^{-1}$ ) 3061, 3026, 2924, 2850, 2703, 1722, 1602, 1489, 1445, 1375, 1374, 1260, 1236, 1089, 1074, 1044, 973, 905, 869, 800, 758, 726, 699.  $^1\text{H}$  NMR (500 MHz,  $\text{CDCl}_3$ )  $\delta$  9.55 (d,  $J = 4.5$  Hz, CHO, 1H), 7.30 (dd,  $J = 7.8, 1.0$  Hz, ArH, 1H), 7.16 (br dd,  $J = 2 \times 7.1$  Hz, ArH, 1H), 7.12 (ddd,  $J = 2 \times 7.2, 1.4$  Hz, ArH, 1H), 7.08 (br d,  $J = 7.3$  Hz, ArH, 1H), 2.93 (ddd,  $J = 17.5, 10.5, 7.5$  Hz,  $\text{CH}_A\text{H}_B$ , 1H), 2.87 (ddd,  $J = 17.5, 6.9, 2.5$  Hz,  $\text{CH}_A\text{H}_B$ , 1H), 2.38 (dddd,  $J = 2 \times 11.8, 2 \times 4.2$  Hz, CHCHO, 1H), 2.32 (br d,  $J = 13.0$  Hz,  $\text{ArCH}_A\text{H}_B$ , 1H), 1.89-1.77 (m,  $\text{CH}_2$ , CH, 3H), 1.77-1.64 (m,  $\text{CH}_A\text{H}_B$ ,  $\text{CH}_2$ , 3H), 1.51-1.37 (m,  $\text{ArCH}_A\text{H}_B$ ,  $\text{CH}_A\text{H}_B$ , 2H), 1.13 (s,  $\text{CH}_3$ , 3H).  $^{13}\text{C}$  NMR (125 MHz,  $\text{CDCl}_3$ )  $\delta$  205.4, 147.0, 135.0, 129.4, 125.82, 125.80, 124.6, 51.3, 41.5, 37.1, 36.4, 29.0, 26.4, 23.0, 22.8, 20.6. HRMS (ESI<sup>+</sup>) exact mass calcd for  $\text{C}_{16}\text{H}_{21}\text{O}$   $[\text{M}+\text{H}]^+$  requires  $m/z$  229.1587, found  $m/z$  229.1588. The enantiomeric excess was determined by HPLC (Chiracel OD-H, 2% *i*-PrOH/hexanes, flow rate 1.0 mL/min,  $\lambda = 214$  nm);  $t_r = 14.3$  (major) and 18.8 (minor) min.  $[\alpha]_D^{23} = -58.0$  ( $c = 0.68$ ,  $\text{CHCl}_3$ , 87% ee).



### 3.2 Bicyclization to Give Aldehyde **8** (Table 2)

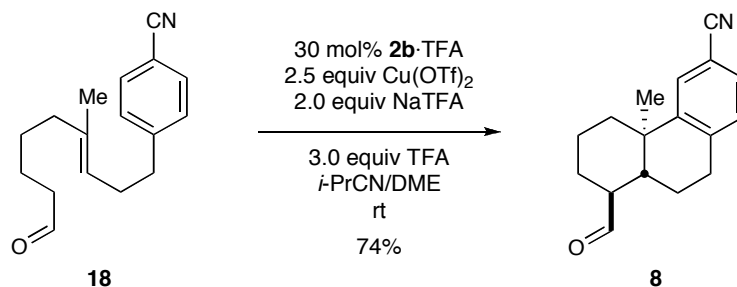

According to GP1, aldehyde **18** (46.1 mg, 0.200 mmol, 1.00 equiv) was subjected to catalyst catalyst **2b**·TFA (24.6 mg, 0.0600 mmol, 0.300 equiv), Cu(OTf)<sub>2</sub> (181 mg, 0.500 mmol, 2.50 equiv), sodium trifluoroacetate (54.4 mg, 0.400 mmol, 2.00 equiv), and TFA (45  $\mu$ L, 0.40 mmol, 2.0 equiv). Aqueous work-up using Et<sub>2</sub>O as a solvent and flash chromatography (8% EtOAc/hexanes) furnished title compound **8** (36 mg, 74% yield) as a white solid. IR (ATR)  $\nu$  (cm<sup>-1</sup>) 2929, 2854, 2713, 2223, 1716, 1605, 1560, 1491, 1444, 1407, 1378, 1276, 1172, 1076, 1042, 918, 891, 878, 843, 818, 750, 732. <sup>1</sup>H NMR (500 MHz, CDCl<sub>3</sub>)  $\delta$  9.57 (d,  $J$  = 3.7 Hz, CHO, 1H), 7.57 (s, ArH, 1H), 7.39 (d,  $J$  = 7.9 Hz, ArH, 1H), 7.16 (d,  $J$  = 7.8 Hz, ArH, 1H), 3.00-2.86 (m, CH<sub>2</sub>, 2H), 2.43-2.35 (m, CHCHO, 1H), 2.30-2.23 (m, ArCH<sub>A</sub>H<sub>B</sub>, 1H), 1.93-1.64 (m, CH, 2  $\times$  CH<sub>2</sub>, CH<sub>A</sub>H<sub>B</sub>, 6H), 1.50-1.33 (m, ArCH<sub>A</sub>H<sub>B</sub>, CH<sub>A</sub>H<sub>B</sub>, 2H), 1.11 (s, CH<sub>3</sub>, 3H). <sup>13</sup>C NMR (125 MHz, CDCl<sub>3</sub>)  $\delta$  204.6, 148.3, 141.1, 130.3, 129.1, 128.9, 119.6, 109.6, 51.1, 40.8, 36.9, 36.5, 29.1, 26.3, 22.7, 22.3, 20.5. HRMS (ESI<sup>+</sup>) exact mass calcd for C<sub>17</sub>H<sub>20</sub>NO [M+H]<sup>+</sup> requires  $m/z$  254.1539, found  $m/z$  254.1537. The enantiomeric excess was determined by HPLC (Chiracel OD-H, 10% *i*-PrOH/hexanes, flow rate 1.0 mL/min,  $\lambda$  = 214 nm);  $t_r$  = 11.7 (major) and 14.3 (minor) min.  $[\alpha]_D^{23}$  = -86.3 (c = 0.82, CHCl<sub>3</sub>, 88% ee).

### 3.3 Bicyclization to Give Aldehyde **9** (Table 2)

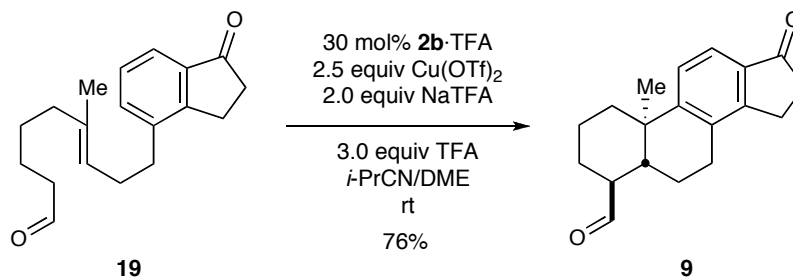

According to GP1, aldehyde **19** (56.9 mg, 0.200 mmol, 1.00 equiv) was subjected to catalyst catalyst **2b**·TFA (24.6 mg, 0.0600 mmol, 0.300 equiv), Cu(OTf)<sub>2</sub> (181 mg, 0.500 mmol, 2.50 equiv), sodium trifluoroacetate (54.4 mg, 0.400 mmol, 2.00 equiv), and TFA (45  $\mu$ L, 0.40 mmol, 2.0 equiv) for 12 h (7 h syringe pump addition + 5 h additional stirring). Aqueous work-up using Et<sub>2</sub>O as a solvent and flash chromatography (20% EtOAc/hexanes) furnished title compound **9** (43 mg, 76% yield) as a white solid. IR (ATR)  $\nu$  (cm<sup>-1</sup>) 3378, 3035, 2924, 2850, 2691, 1722, 1700, 1592, 1466, 1443, 1418, 1400, 1375, 1351, 1289, 1270, 1250, 1209, 1192, 1145, 1095, 1059, 1044, 973, 922, 822, 753, 734, 712, 694, 643, 612. <sup>1</sup>H NMR (500 MHz, CDCl<sub>3</sub>)  $\delta$  9.59 (d,  $J$  = 3.4 Hz, CHO, 1H), 7.58 (d,  $J$  = 8.0 Hz, ArH, 1H), 7.38 (d,  $J$  = 8.1 Hz, ArH, 1H), 3.00-2.64 (m, 3  $\times$  CH<sub>2</sub>, 6H), 2.48-2.31 (m, CHCHO, ArCH<sub>A</sub>H<sub>B</sub>, 2H), 1.93-1.69 (m, CH, 2  $\times$  CH<sub>2</sub>, CH<sub>A</sub>H<sub>B</sub>, 6H), 1.51-1.35 (m, ArCH<sub>A</sub>H<sub>B</sub>, CH<sub>A</sub>H<sub>B</sub>, 2H), 1.16 (s, CH<sub>3</sub>, 3H). <sup>13</sup>C NMR (125 MHz, CDCl<sub>3</sub>)  $\delta$  207.3, 204.9, 155.1, 153.7, 134.7, 132.9, 124.4, 120.9, 51.1, 41.0, 37.14, 37.09, 36.5, 26.3, 25.4, 24.7, 22.6, 22.2, 20.6. HRMS (ESI<sup>+</sup>) exact mass calcd for C<sub>19</sub>H<sub>23</sub>O<sub>2</sub> [M+H]<sup>+</sup> requires  $m/z$  283.1691, found  $m/z$  283.1693. The enantiomeric excess was determined by HPLC (Chiracel OJ-H, 10% *i*-PrOH/hexanes, flow rate 1.0 mL/min,  $\lambda$  = 214 nm);  $t_r$  = 23.3 (minor) and 27.5 (major) min.  $[\alpha]_D^{25}$  = -65.6 (c = 0.84, CHCl<sub>3</sub>, 85% ee).

### 3.4 Bicyclization to Give Aldehyde **10** (Table 2)

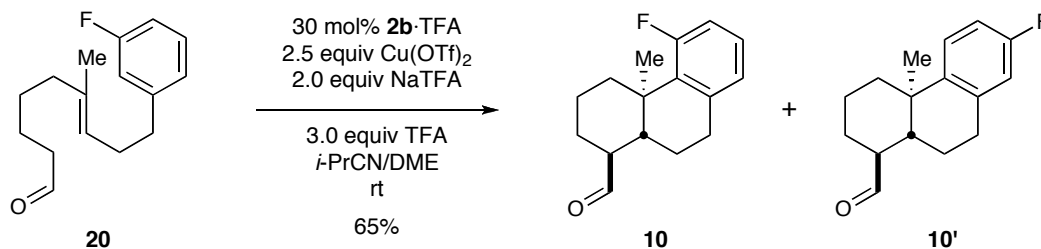

According to GP1, aldehyde **20** (46.7 mg, 0.200 mmol, 1.00 equiv) was subjected to catalyst catalyst **2b**-TFA (24.6 mg, 0.0600 mmol, 0.300 equiv), Cu(OTf)<sub>2</sub> (181 mg, 0.500 mmol, 2.50 equiv), sodium trifluoroacetate (54.4 mg, 0.400 mmol, 2.00 equiv), and TFA (45  $\mu$ L, 0.40 mmol, 2.0 equiv). Aqueous work-up using Et<sub>2</sub>O as a solvent and flash chromatography (1.5% EtOAc/hexanes) furnished title compound **10** (32 mg, 65% yield, 4:1 mixture of **10**:**10'**) as a colorless oil. Clean **10** (19 mg, 39% yield) could be obtained after a second flash column chromatography. IR (ATR)  $\nu$  (cm<sup>-1</sup>) 2933, 2867, 2709, 1722, 1703, 1613, 1588, 1572, 1494, 1449, 1377, 1349, 1293, 1233, 1139, 1057, 1020, 966, 941, 908, 865, 832, 812, 779, 731, 691. <sup>1</sup>H NMR (500 MHz, CDCl<sub>3</sub>)  $\delta$  9.56 (d,  $J$  = 4.5 Hz, CHO, 1H), 7.08 (ddd,  $J$  = 7.8,  $J_{\text{H,F}}$  = 5.3 Hz, ArH, 1H), 6.85 (d,  $J$  = 7.5 Hz, ArH, 1H), 6.81 (dd,  $J_{\text{H,F}}$  = 13.1,  $J$  = 8.0 Hz, ArH, 1H), 2.93 (ddd,  $J$  = 17.6, 11.7, 7.4 Hz, CH<sub>A</sub>H<sub>B</sub>, 1H), 2.84-2.76 (m, CH<sub>A</sub>H<sub>B</sub>, ArCH<sub>A</sub>H<sub>B</sub>, 2H), 2.47 (dddd,  $J$  = 2  $\times$  12.0, 2  $\times$  4.2 Hz, CHCHO, 1H), 1.88-1.70 (m, CH, CH<sub>A</sub>H<sub>B</sub>, CH<sub>2</sub>, 4H), 1.60-1.55 (m, CH<sub>2</sub>, 2H), 1.48-1.38 (m, ArCH<sub>A</sub>H<sub>B</sub>, CH<sub>A</sub>H<sub>B</sub>, 2H), 1.26 (s, CH<sub>3</sub>, 3H). <sup>13</sup>C NMR (125 MHz, CDCl<sub>3</sub>)  $\delta$  205.2, 162.1 (d,  $J_{\text{C,F}}$  = 248 Hz), 138.6 (d,  $J_{\text{C,F}}$  = 5.2 Hz), 133.4 (d,  $J_{\text{C,F}}$  = 11 Hz), 126.9 (d,  $J_{\text{C,F}}$  = 9.9 Hz), 125.3 (d,  $J_{\text{C,F}}$  = 2.8 Hz), 113.8 (d,  $J_{\text{C,F}}$  = 25 Hz), 50.5, 43.6, 37.2 (d,  $J_{\text{C,F}}$  = 3.2 Hz), 35.7 (d,  $J_{\text{C,F}}$  = 12 Hz), 30.8 (d,  $J_{\text{C,F}}$  = 2.4 Hz), 26.5 (d,  $J_{\text{C,F}}$  = 1.3 Hz), 22.7, 20.5, 19.0 (d,  $J_{\text{C,F}}$  = 1.0 Hz). HRMS (ESI<sup>+</sup>) exact mass calcd for C<sub>16</sub>H<sub>20</sub>OF [M+H]<sup>+</sup> requires  $m/z$  247.1493, found  $m/z$  247.1494. The enantiomeric excess was determined by HPLC (Chiracel OD-H, 2% *i*-PrOH/hexanes, flow rate 1.0 mL/min,  $\lambda$  = 214 nm);  $t_r$  = 7.92 (major) and 9.23 (minor) min.  $[\alpha]_D^{23}$  = -83.5 (c = 0.52, CHCl<sub>3</sub>, 90% ee).

### 3.5 Bicyclization to Give Aldehyde **11** (Table 2)

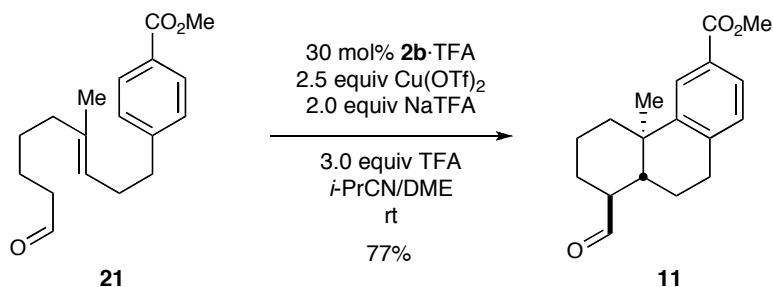

According to GP1, aldehyde **21** (57.7 mg, 0.200 mmol, 1.00 equiv) was subjected to catalyst catalyst **2b**·TFA (24.6 mg, 0.0600 mmol, 0.300 equiv), Cu(OTf)<sub>2</sub> (181 mg, 0.500 mmol, 2.50 equiv), sodium trifluoroacetate (54.4 mg, 0.400 mmol, 2.00 equiv), and TFA (45  $\mu$ L, 0.40 mmol, 2.0 equiv). Aqueous work-up using Et<sub>2</sub>O as a solvent and flash chromatography (8% EtOAc/hexanes) furnished title compound **11** (44 mg, 77% yield) as a white solid. IR (ATR)  $\nu$  (cm<sup>-1</sup>) 2932, 2863, 2707, 1717, 1703, 1606, 1568, 1496, 1435, 1405, 1377, 1332, 1291, 1262, 1225, 1188, 1144, 1109, 1069, 972, 904, 880, 860, 802, 762. <sup>1</sup>H NMR (500 MHz, CDCl<sub>3</sub>)  $\delta$  9.57 (d, *J* = 3.9 Hz, CHO, 1H), 7.99 (s, ArH, 1H), 7.77 (d, *J* = 7.9 Hz, ArH, 1H), 7.13 (d, *J* = 7.9 Hz, ArH, 1H), 3.90 (s, CO<sub>2</sub>CH<sub>3</sub>, 3H), 3.00-2.88 (m, CH<sub>2</sub>, 2H), 2.45-2.34 (m, CHCHO, ArCH<sub>A</sub>H<sub>B</sub>, 2H), 1.92-1.66 (m, CH<sub>2</sub>, CH<sub>A</sub>H<sub>B</sub>, CH, CH<sub>2</sub> 6H), 1.51-1.35 (m, ArCH<sub>A</sub>H<sub>B</sub>, CH<sub>A</sub>H<sub>B</sub>, 2H), 1.13 (s, CH<sub>3</sub>, 3H). <sup>13</sup>C NMR (125 MHz, CDCl<sub>3</sub>)  $\delta$  205.0, 167.4, 147.2, 140.8, 129.5, 127.6, 126.8, 126.1, 52.0, 51.2, 41.1, 37.0, 36.4, 29.1, 26.3, 22.64, 22.56, 20.5. HRMS (ESI<sup>+</sup>) exact mass calcd for C<sub>18</sub>H<sub>23</sub>O<sub>3</sub> [M+H]<sup>+</sup> requires *m/z* 287.1640, found *m/z* 287.1640. The enantiomeric excess was determined by HPLC (Chiracel AS-H, 10% *i*-PrOH/hexanes, flow rate 1.0 mL/min,  $\lambda$  = 230 nm); *t*<sub>r</sub> = 16.3 (major) and 22.1 (minor) min. [ $\alpha$ ]<sub>D</sub><sup>23</sup> = -62.3 (c = 1.2, CHCl<sub>3</sub>, 87% ee).

### 3.6 Bicyclization to Give Aldehyde **12** (Table 2)

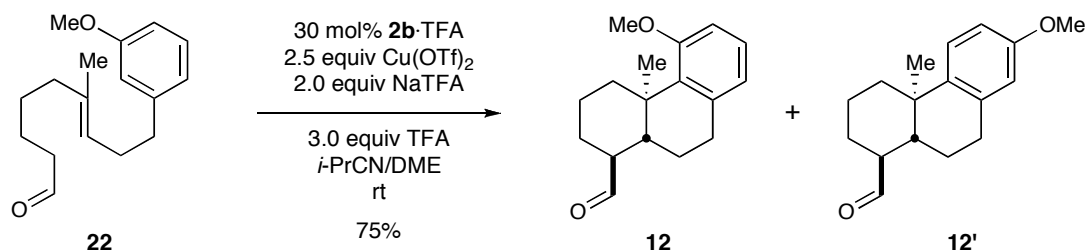

According to GP1, aldehyde **22** (52.1 mg, 0.200 mmol, 1.00 equiv) was subjected to catalyst catalyst **2b**·TFA (24.6 mg, 0.0600 mmol, 0.300 equiv), Cu(OTf)<sub>2</sub> (181 mg, 0.500 mmol, 2.50 equiv), sodium trifluoroacetate (54.4 mg, 0.400 mmol, 2.00 equiv), and TFA (45  $\mu$ L, 0.40 mmol, 2.0 equiv). Aqueous work-up using Et<sub>2</sub>O as a solvent and flash chromatography (5% EtOAc/hexanes) furnished title compound **12** (39 mg, 75% yield, 2:1 mixture of **12**:**12'**) as a colorless oil. Clean **12** (white solid, 15 mg, 29% yield) and **12'** (colorless oil, 8.0 mg, 15% yield) could be obtained after a second flash column chromatography. Analytical data for **12**: IR (ATR)  $\nu$  (cm<sup>-1</sup>) 3407, 3056, 3008, 2982, 2925, 2863, 2834, 2735, 1722, 1596, 1574, 1462, 1454, 1434, 1372, 1355, 1347, 1329, 1295, 1274, 1246, 1194, 1129, 1113, 1075, 1059, 1038, 1013, 974, 950, 913, 883, 863, 830, 802, 773, 693, 669. <sup>1</sup>H NMR (500 MHz, CDCl<sub>3</sub>)  $\delta$  9.54 (d,  $J$  = 4.6 Hz, CHO, 1H), 7.99 (dd,  $J$  = 2  $\times$  7.9 Hz ArH, 1H), 7.10 (d,  $J$  = 7.4 Hz, 2  $\times$  ArH, 2H), 3.80 (s, OCH<sub>3</sub>, 3H), 3.15 (br d,  $J$  = 13.3 Hz, ArCH<sub>A</sub>H<sub>B</sub>, 1H), 2.94 (ddd,  $J$  = 16.8, 12.6, 6.4 Hz, CH<sub>A</sub>H<sub>B</sub>, 1H), 2.78 (dd,  $J$  = 17.0, 5.1 Hz, CH<sub>A</sub>H<sub>B</sub>, 1H), 2.48 (dddd,  $J$  = 2  $\times$  15.7, 2  $\times$  3.9 Hz, CHCHO, 1H), 1.82 (ddd,  $J$  = 2  $\times$  12.0 Hz, CH, 1H), 1.78-1.70 (m, CH<sub>2</sub>, CH<sub>A</sub>H<sub>B</sub>, 3H), 1.66-1.56 (m, CH<sub>A</sub>H<sub>B</sub>, 1H), 1.53-1.37 (m, CH<sub>A</sub>H<sub>B</sub>, CH<sub>A</sub>H<sub>B</sub>, 2H), 1.28-1.19 (m, ArCH<sub>A</sub>H<sub>B</sub>, 1H), 1.26 (s, CH<sub>3</sub>, 3H). <sup>13</sup>C NMR (125 MHz, CDCl<sub>3</sub>)  $\delta$  205.7, 158.9, 137.8, 134.6, 126.5, 122.4, 109.2, 55.1, 50.8, 44.6, 37.9, 34.9, 31.6, 26.6, 22.8, 20.7, 17.6. HRMS (ESI<sup>+</sup>) exact mass calcd for C<sub>17</sub>H<sub>23</sub>O<sub>2</sub> [M+H]<sup>+</sup> requires  $m/z$  259.1692, found  $m/z$  259.1693. The enantiomeric excess was determined by HPLC (Chiracel OD-H, 2% *i*-PrOH/hexanes, flow rate 1.0 mL/min,  $\lambda$  = 230 nm);  $t_r$  = 8.1 (minor) and 21.5 (major) min.  $[\alpha]_D^{23}$  = -70.8 (c = 0.53, CHCl<sub>3</sub>, 88% ee). Analytical data for **12'**: <sup>1</sup>H NMR (500 MHz, CDCl<sub>3</sub>)  $\delta$  9.55 (d,  $J$  = 4.3 Hz, CHO, 1H), 7.20 (d,  $J$  = 8.6 Hz, ArH, 1H), 7.33 (dd,  $J$  = 8.5, 2.1 Hz, ArH, 1H), 6.60 (s, ArH, 1H), 3.77 (s, OCH<sub>3</sub>, 3H), 2.94-2.82 (m, CH<sub>2</sub>, 2H), 2.36 (dddd,  $J$  = 2  $\times$  11.8, 2  $\times$  3.9 Hz, CHCHO, 1H), 2.28 (br d,  $J$  = 12.9 Hz, ArCH<sub>A</sub>H<sub>B</sub>, 1H), 1.88-1.63 (m, CH<sub>2</sub>, CH<sub>A</sub>H<sub>B</sub>, CH, CH<sub>2</sub>, 6H), 1.48-1.35 (m, ArCH<sub>A</sub>H<sub>B</sub>, CH<sub>A</sub>H<sub>B</sub>, 2H), 1.10 (s, CH<sub>3</sub>, 3H). <sup>13</sup>C NMR (125 MHz, CDCl<sub>3</sub>)  $\delta$  205.5, 157.4, 139.5, 136.4, 125.7, 113.6, 112.0, 55.2, 51.2, 41.7, 37.3, 35.8, 29.3, 26.4, 23.0, 22.8, 20.6. The enantiomeric excess was determined by HPLC (Chiracel AS-H, 2% *i*-PrOH/hexanes, flow rate 1.0 mL/min,  $\lambda$  = 230 nm);  $t_r$  = 21.2 (major) and 52.9 (minor) min.

3.7 Tricyclization to Give Aldehyde **13** (Table 2)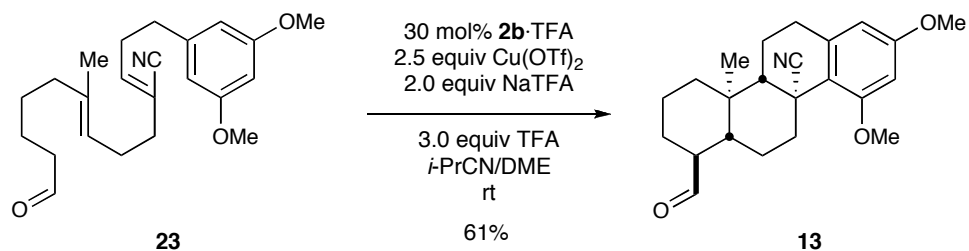

According to GP1, aldehyde **23** (73.9 mg, 0.200 mmol, 1.00 equiv) was subjected to catalyst catalyst **2b**-TFA (24.6 mg, 0.0600 mmol, 0.300 equiv),  $\text{Cu(OTf)}_2$  (181 mg, 0.500 mmol, 2.50 equiv), sodium trifluoroacetate (54.4 mg, 0.400 mmol, 2.00 equiv), and TFA (45  $\mu\text{L}$ , 0.40 mmol, 2.0 equiv). Aqueous work-up using EtOAc as a solvent and flash chromatography (15% EtOAc/hexanes) furnished title compound **13** (45 mg, 61% yield) as a white solid. IR (ATR)  $\nu$  ( $\text{cm}^{-1}$ ) 2933, 2872, 2844, 2695, 2223, 1724, 1614, 1577, 1474, 1461, 1445, 1424, 1355, 1345, 1317, 1303, 1264, 1246, 1219, 1202, 1189, 1158, 1124, 1107, 1083, 1047, 1034, 988, 956, 876, 856, 830, 800, 749, 735, 669, 637.  $^1\text{H NMR}$  (500 MHz,  $\text{CDCl}_3$ )  $\delta$  9.54 (d,  $J = 4.2$  Hz, CHO, 1H), 6.32 (d,  $J = 2.4$  Hz, ArH, 1H), 6.23 (d,  $J = 2.4$  Hz, ArH, 1H), 3.83 (s,  $\text{OCH}_3$ , 3H), 3.78 (s,  $\text{OCH}_3$ , 3H), 3.58 (ddd,  $J = 13.7, 2 \times 3.3$  Hz,  $\text{ArCH}_A\text{H}_B$ , 1H), 2.86 (m,  $\text{CH}_2$ , 2H), 2.33 (dddd,  $J = 2 \times 12.0, 2 \times 3.9$  Hz,  $\text{CHCHO}$ , 1H), 2.02 (br d,  $J = 12.0$  Hz,  $\text{CH}_A\text{H}_B$ , 1H), 1.93 (br d,  $J = 12.8$  Hz,  $\text{CH}_A\text{H}_B$ , 1H), 1.82-1.62 (m,  $\text{CH}_2$ ,  $2 \times \text{CH}_A\text{H}_B$ ,  $\text{CH}_A\text{H}_B$ , 5H), 1.57-1.52 (m,  $\text{CH}_A\text{H}_B$ , 1H), 1.46-1.26 (m,  $2 \times \text{CH}$ ,  $\text{CH}_A\text{H}_B$ ,  $\text{ArCH}_A\text{H}_B$ , 4H), 1.17 (s,  $\text{CH}_3$ , 3H), 0.96 (ddd,  $J = 2 \times 12.3, 2 \times 6.3$  Hz,  $\text{CH}_A\text{H}_B$ , 1H).  $^{13}\text{C NMR}$  (125 MHz,  $\text{CDCl}_3$ )  $\delta$  205.3, 160.1, 159.8, 139.6, 123.3, 119.2, 105.1, 97.7, 55.6, 55.3, 55.0, 49.9, 46.8, 39.6, 37.7, 37.1, 35.2, 32.8, 26.4, 23.9, 20.2, 19.7, 12.8. HRMS (ESI $^+$ ) exact mass calcd for  $\text{C}_{23}\text{H}_{30}\text{NO}_3$   $[\text{M}+\text{H}]^+$  requires  $m/z$  368.2221, found  $m/z$  368.2222. The enantiomeric excess was determined by HPLC (Chiracel OD-H, 20% *i*-PrOH/hexanes, flow rate 1.0 mL/min,  $\lambda = 214$  nm);  $t_r = 10.8$  (major) and 14.1 (minor) min.  $[\alpha]_D^{25} = +81.3$  ( $c = 0.77$ ,  $\text{CHCl}_3$ , 91% ee).

3.8 Tricyclization to Give Aldehyde **14** (Table 2)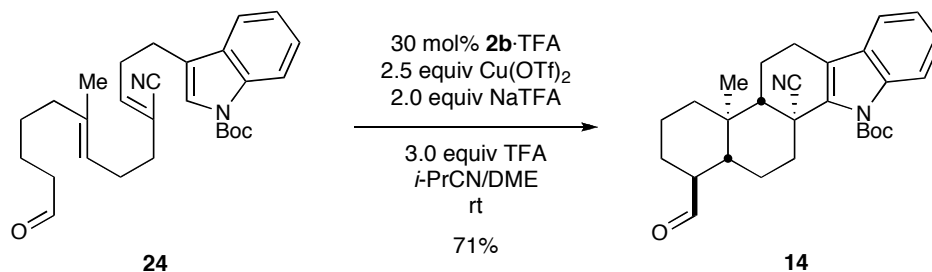

According to GP1, aldehyde **24** (89.7 mg, 0.200 mmol, 1.00 equiv) was subjected to catalyst catalyst **2b**-TFA (24.6 mg, 0.0600 mmol, 0.300 equiv), Cu(OTf)<sub>2</sub> (181 mg, 0.500 mmol, 2.50 equiv), sodium trifluoroacetate (54.4 mg, 0.400 mmol, 2.00 equiv), and TFA (45  $\mu$ L, 0.40 mmol, 2.0 equiv). Aqueous work-up using EtOAc as a solvent and flash chromatography (10% EtOAc/hexanes) furnished title compound **14** (63 mg, 71% yield as a white solid. IR (ATR)  $\nu$  (cm<sup>-1</sup>) 2974, 2930, 2868, 2711, 2229, 1723, 1603, 1476, 1452, 1394, 1369, 1355, 1310, 1253, 1237, 1214, 1153, 1136, 1119, 1092, 1024, 1010, 976, 937, 911, 846, 829, 746. <sup>1</sup>H NMR (500 MHz, CDCl<sub>3</sub>)  $\delta$  9.54 (d,  $J$  = 4.0 Hz, CHO, 1H), 7.98 (d,  $J$  = 8.4 Hz, ArH, 1H), 7.44 (d,  $J$  = 7.5 Hz, ArH, 1H), 7.33 (ddd,  $J$  = 2  $\times$  8.4, 1.2 Hz, ArH, 1H), 7.25 (dd,  $J$  = 2  $\times$  7.5 Hz, ArH, 1H), 3.16 (ddd,  $J$  = 13.2, 2  $\times$  3.1 Hz, ArCH<sub>A</sub>H<sub>B</sub>, 1H), 2.91 (dd,  $J$  = 16.8, 4.4 Hz, CH<sub>A</sub>H<sub>B</sub>, 1H), 2.66 (ddd,  $J$  = 16.8, 11.9, 6.2 Hz, CH<sub>A</sub>H<sub>B</sub>, 1H), 2.37 (dddd,  $J$  = 2  $\times$  11.8, 2  $\times$  3.8 Hz, CHCHO, 1H), 2.21 (dd,  $J$  = 14.0, 6.2 Hz, CH<sub>A</sub>H<sub>B</sub>, 1H), 2.05-1.94 (m, CH<sub>A</sub>H<sub>B</sub>, CH<sub>A</sub>H<sub>B</sub>, 2H), 1.85-1.64 (m, 2  $\times$  CH<sub>A</sub>H<sub>B</sub>, CH<sub>2</sub>, 4H), 1.70 (s, C(CH<sub>3</sub>)<sub>3</sub>, 9H), 1.63-1.58 (m, CH<sub>A</sub>H<sub>B</sub>, 1H), 1.54-1.18 (m, ArCH<sub>A</sub>H<sub>B</sub>, 2  $\times$  CH, CH<sub>A</sub>H<sub>B</sub>, 4H), 1.24 (s, CH<sub>3</sub>, 3H), 1.00-0.91 (m, CH<sub>A</sub>H<sub>B</sub>, 1H). <sup>13</sup>C NMR (125 MHz, CDCl<sub>3</sub>)  $\delta$  205.0, 150.6, 137.3, 134.3, 128.3, 125.4, 122.9, 121.9, 120.9, 118.7, 115.4, 85.1, 56.9, 49.8, 47.0, 40.0, 37.7, 37.2, 33.6, 28.3, 26.4, 23.2, 22.8, 19.7, 19.6, 12.9. HRMS (ESI<sup>+</sup>) exact mass calcd for C<sub>28</sub>H<sub>34</sub>N<sub>2</sub>O<sub>3</sub>Na [M+Na]<sup>+</sup> requires  $m/z$  469.2462, found  $m/z$  469.2462. The enantiomeric excess was determined by HPLC (Chiracel OD-H, 10% *i*-PrOH/hexanes, flow rate 0.80 mL/min,  $\lambda$  = 230 nm);  $t_r$  = 12.5 (major) and 14.5 (minor) min.  $[\alpha]_D^{24}$  = +59.7 (c = 0.69, CHCl<sub>3</sub>, 92% ee).

3.9 Tricyclization to Give Aldehyde **15** (Table 2)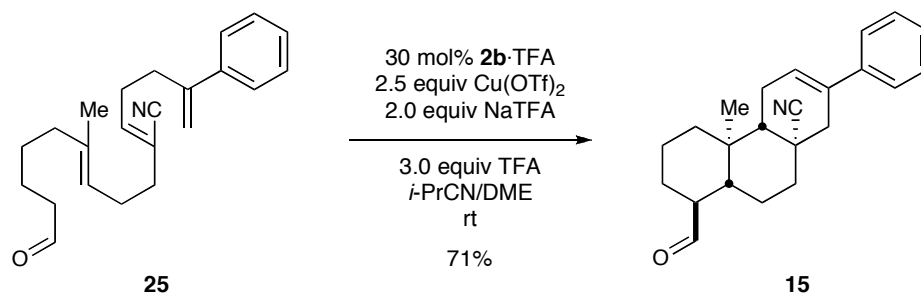

According to GP1, aldehyde **25** (67.1 mg, 0.200 mmol, 1.00 equiv) was subjected to catalyst catalyst **2b**·TFA (24.6 mg, 0.0600 mmol, 0.300 equiv), Cu(OTf)<sub>2</sub> (181 mg, 0.500 mmol, 2.50 equiv), sodium trifluoroacetate (54.4 mg, 0.400 mmol, 2.00 equiv), and TFA (45  $\mu$ L, 0.40 mmol, 2.0 equiv). Aqueous work-up using EtOAc as a solvent and flash chromatography (10% EtOAc/hexanes) furnished title compound **15** (36 mg, 54% yield). IR (ATR)  $\nu$  (cm<sup>-1</sup>) 3035, 2929, 2855, 2706, 2230, 1720, 1646, 1598, 1577, 1497, 1470, 1446, 1431, 1393, 1365, 1346, 1277, 1243, 1192, 1159, 1138, 1077, 1047, 1023, 1004, 988, 914, 848, 834, 752, 695, 676. <sup>1</sup>H NMR (500 MHz, CDCl<sub>3</sub>)  $\delta$  9.55 (d,  $J$  = 3.9 Hz, CHO, 1H), 7.36-7.30 (m, ArH, 4H), 7.27-7.23 (m, ArH, 1H), 6.20-6.17 (m, CH<sub>vin</sub>, 1H), 2.84 (d,  $J$  = 16.7 Hz, CH<sub>A</sub>H<sub>B</sub>, 1H), 2.53-2.27 (m, CH<sub>A</sub>H<sub>B</sub>, CH<sub>2</sub>, CHCHO, CH<sub>A</sub>H<sub>B</sub>, 5H), 1.85-1.77 (m, CH<sub>A</sub>H<sub>B</sub>, CH<sub>A</sub>H<sub>B</sub>, 2H), 1.74-1.41 (m, 2  $\times$  CH<sub>2</sub>, CH<sub>A</sub>H<sub>B</sub>, 2  $\times$  CH, 7H), 1.36-1.23 (m, CH<sub>A</sub>H<sub>B</sub>, 1H), 1.14, (s, CH<sub>3</sub>, 3H), 0.98 (ddd,  $J$  = 2  $\times$  13.0, 4.1 Hz, CH<sub>A</sub>H<sub>B</sub>, 1H). <sup>13</sup>C NMR (125 MHz, CDCl<sub>3</sub>)  $\delta$  204.9, 140.7, 132.7, 128.5, 127.3, 125.2, 124.2, 123.9, 50.2, 49.4, 45.9, 42.8, 38.0, 37.9, 36.11, 36.05, 26.4, 24.1, 23.1, 19.6, 12.4. HRMS (ESI<sup>+</sup>) exact mass calcd for C<sub>23</sub>H<sub>28</sub>NO [M+H]<sup>+</sup> requires  $m/z$  334.2165, found  $m/z$  334.2164. The enantiomeric excess was determined by HPLC (Chiracel OD-H, 10% *i*-PrOH/hexanes, flow rate 1.0 mL/min,  $\lambda$  = 214 nm);  $t_r$  = 22.3 (major) and 31.0 (minor) min.  $[\alpha]_D^{25}$  = -48.6 ( $c$  = 0.75, CHCl<sub>3</sub>, 85% ee).



### 3.10 Tetracyclization to Give Aldehyde **5** (Scheme 2)

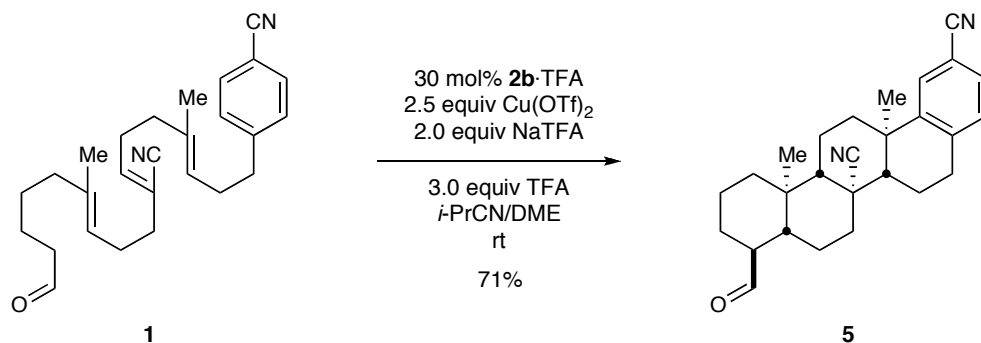

According to GP1, aldehyde **1** (80.5 mg, 0.200 mmol, 1.00 equiv) was subjected to catalyst catalyst **2b**-TFA (24.6 mg, 0.0600 mmol, 0.300 equiv), Cu(OTf)<sub>2</sub> (181 mg, 0.500 mmol, 2.50 equiv), sodium trifluoroacetate (54.4 mg, 0.400 mmol, 2.00 equiv), and TFA (45  $\mu$ L, 0.40 mmol, 2.0 equiv). Aqueous work-up using CHCl<sub>3</sub> as a solvent and flash chromatography (10% EtOAc/20% CHCl<sub>3</sub>/70% hexanes) furnished title compound **5** (45 mg, 56% yield). IR (ATR)  $\nu$  (cm<sup>-1</sup>) 2923, 2858, 2731, 2224, 1719, 1606, 1560, 1505, 1492, 1445, 1405, 1377, 1290, 1248, 1203, 1179, 1164, 1065, 1046, 1032, 1021, 938, 913, 844, 824, 728. <sup>1</sup>H NMR (500 MHz, CDCl<sub>3</sub>)  $\delta$  9.53 (d, *J* = 4.0 Hz, CHO, 1H), 7.52 (d, *J* = 1.3 Hz, ArH, 1H), 7.39 (dd, *J* = 7.9, 1.5 Hz, ArH, 1H), 7.15 (d, *J* = 7.9 Hz, ArH, 1H), 3.09 (ddd, *J* = 18.4, 8.0, 2.1 Hz, CH<sub>A</sub>H<sub>B</sub>, 1H), 2.93 (ddd, *J* = 18.1, 2  $\times$  8.9 Hz, CH<sub>A</sub>H<sub>B</sub>, 1H), 2.45 (ddd, *J* = 12.9, 2  $\times$  3.2 Hz, CH<sub>A</sub>H<sub>B</sub>, 1H), 2.40 (ddd, *J* = 13.3, 2  $\times$  3.3 Hz, ArCH<sub>A</sub>H<sub>B</sub>, 1H), 2.34 (dddd, *J* = 2  $\times$  12.0, 2  $\times$  3.9 Hz, CHCHO, 1H), 2.11-1.93 (m, CH<sub>2</sub>, CH<sub>A</sub>H<sub>B</sub>, 3H), 1.88 (br d, *J* = 12.8 Hz, CH<sub>A</sub>H<sub>B</sub>, 1H), 1.83-1.44 (m, CH<sub>A</sub>H<sub>B</sub>, 2  $\times$  CH<sub>2</sub>, 2  $\times$  CH<sub>A</sub>H<sub>B</sub>, CH, 8H), 1.39 (s, CH<sub>3</sub>, 3H), 1.38-1.23 (m, ArCH<sub>A</sub>H<sub>B</sub>, CH<sub>A</sub>H<sub>B</sub>, CH, 3H), 1.16 (s, CH<sub>3</sub>, 3H), 1.07-1.01 (m, CH, 1H), 0.93-0.84 (m, CH<sub>A</sub>H<sub>B</sub>, 1H). <sup>13</sup>C NMR (125 MHz, CDCl<sub>3</sub>)  $\delta$  205.0, 149.4, 140.5, 129.9, 129.3, 128.1, 123.8, 119.5, 109.7, 56.4, 50.9, 49.9, 46.2, 40.1, 38.6, 38.0, 37.8, 37.4, 36.7, 28.6, 26.5, 23.8, 22.9, 19.7, 19.6, 18.2, 12.7. HRMS (ESI<sup>+</sup>) exact mass calcd for C<sub>27</sub>H<sub>33</sub>N<sub>2</sub>O [M+H]<sup>+</sup> requires *m/z* 401.2587, found *m/z* 401.2583. The enantiomeric excess was determined by SFC (Chiracel AD-H, 60% EtOH w/0.1% DEA/CO<sub>2</sub>, 100 bar, flow rate 2.5 mL/min,  $\lambda$  = 220 nm); *t*<sub>r</sub> = 2.64 (major) and 3.64 (minor) min.  $[\alpha]_D^{24}$  = -26.1 (*c* = 0.68, CHCl<sub>3</sub>, 92% ee).

### 3.11 Pentacyclization to Give Aldehyde **16** (Scheme 2)

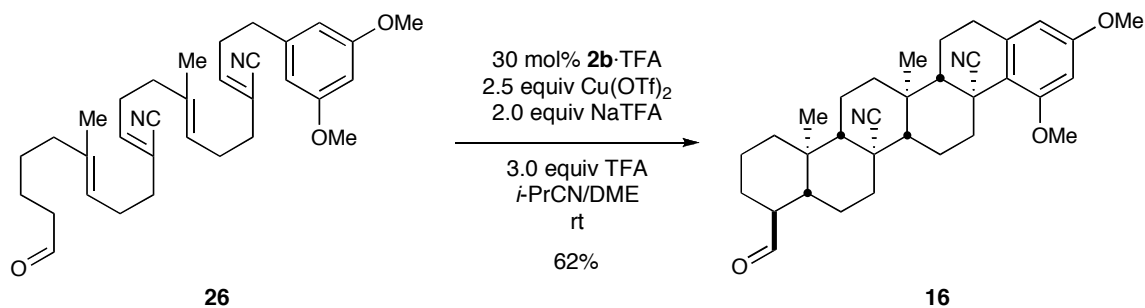

According to GP1, aldehyde **26** (103 mg, 0.200 mmol, 1.00 equiv) was subjected to catalyst catalyst **2b**-TFA (24.6 mg, 0.0600 mmol, 0.300 equiv),  $\text{Cu}(\text{OTf})_2$  (181 mg, 0.500 mmol, 2.50 equiv), sodium trifluoroacetate (54.4 mg, 0.400 mmol, 2.00 equiv), and TFA (45  $\mu\text{L}$ , 0.40 mmol, 2.0 equiv). Aqueous work-up using  $\text{CHCl}_3$  as a solvent and flash chromatography (15% EtOAc/30%  $\text{CHCl}_3$ /55% hexanes) furnished title compound **16** (66 mg, 62% yield). IR (ATR)  $\nu$  ( $\text{cm}^{-1}$ ) 2952, 2928, 2865, 2846, 2229, 1717, 1607, 1589, 1447, 1381, 1358, 1349, 1336, 1308, 1281, 1206, 1195, 1165, 1144, 1104, 1075, 1062, 1038, 1016, 979, 965, 947, 930, 864, 843, 817, 696, 672, 627.  $^1\text{H}$  NMR (500 MHz,  $\text{CDCl}_3$ )  $\delta$  9.53 (d,  $J = 3.8$  Hz, CHO, 1H), 6.32 (d,  $J = 2.1$  Hz, ArH, 1H), 6.22 (d,  $J = 1.9$  Hz, ArH, 1H), 3.84 (s,  $\text{OCH}_3$ , 3H), 3.77 (s,  $\text{OCH}_3$ , 3H), 3.70 (br d,  $J = 13.9$  Hz,  $\text{ArCH}_A\text{H}_B$ , 1H), 2.91-2.74 (m,  $\text{CH}_2$ , 2H), 2.38-2.27 (m, CH,  $\text{CH}_A\text{H}_B$ , 2H), 2.06 (br d,  $J = 13.0$  Hz,  $\text{CH}_A\text{H}_B$ , 1H), 2.03-1.94 (m,  $\text{CH}_2$ , 2H), 1.91-1.50 (m,  $4 \times \text{CH}_2$ ,  $2 \times \text{CH}_A\text{H}_B$ , 10H), 1.45 (s,  $\text{CH}_3$ , 3H), 1.37-1.08 (m,  $3 \times \text{CH}$ ,  $\text{ArCH}_A\text{H}_B$ ,  $2 \times \text{CH}_A\text{H}_B$ , 6H), 1.13 (s,  $\text{CH}_3$ , 3H), 1.04-0.95 (m, CH,  $\text{CH}_A\text{H}_B$ , 2H), 0.84 (ddd,  $J = 2 \times 12.3$ , 4.2 Hz,  $\text{CH}_A\text{H}_B$ , 1H).  $^{13}\text{C}$  NMR (125 MHz,  $\text{CDCl}_3$ )  $\delta$  205.1, 160.1, 159.8, 139.4, 123.5, 122.8, 119.2, 105.1, 97.7, 57.1, 56.9, 56.6, 55.6, 55.3, 49.9, 46.3, 39.7, 39.1, 38.6, 38.5, 37.7, 37.6, 36.7, 35.8, 32.7, 26.5, 22.9, 20.0, 19.8, 19.7, 18.8, 15.1, 12.6. HRMS (ESI<sup>+</sup>) exact mass calcd for  $\text{C}_{33}\text{H}_{42}\text{N}_2\text{O}_3\text{Na}$   $[\text{M}+\text{Na}]^+$  requires  $m/z$  537.3088, found  $m/z$  537.3085. The enantiomeric excess was determined by SFC (Chiralpak IA, 40% EtOH/ $\text{CO}_2$ , 100 bar, flow rate 3.0 mL/min,  $\lambda = 220$  nm);  $t_r = 3.42$  (major) and 5.13 (minor) min.  $[\alpha]_D^{24} = +44.6$  ( $c = 0.62$ ,  $\text{CHCl}_3$ , 93% ee).

3.12 Hexacyclization to Give Aldehyde **17** (Table 2)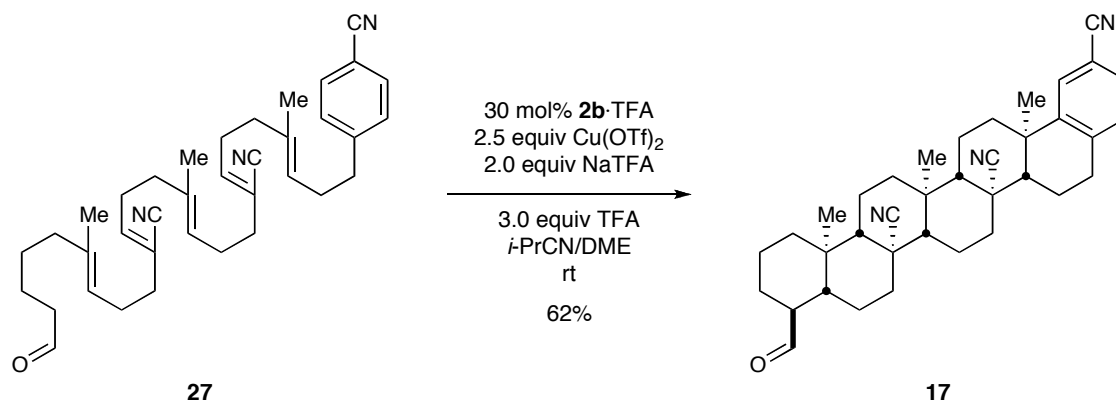

According to GP1, aldehyde **27** (107 mg, 0.200 mmol, 1.00 equiv) was subjected to catalyst catalyst **2b**·TFA (24.6 mg, 0.0600 mmol, 0.300 equiv), Cu(OTf)<sub>2</sub> (181 mg, 0.500 mmol, 2.50 equiv), sodium trifluoroacetate (54.4 mg, 0.400 mmol, 2.00 equiv), and TFA (45  $\mu$ L, 0.40 mmol, 2.0 equiv). Aqueous work-up using CHCl<sub>3</sub> as a solvent and flash chromatography (20% EtOAc/30% CHCl<sub>3</sub>/50% hexanes) furnished title compound **17** (66 mg, 62% yield). IR (ATR)  $\nu$  (cm<sup>-1</sup>) 2926, 2855, 2715, 2226, 1729, 1607, 1564, 1492, 1447, 1380, 1257, 1165, 1060, 1037, 1021, 965, 937, 889, 847, 826, 754, 626. <sup>1</sup>H NMR (500 MHz, CDCl<sub>3</sub>)  $\delta$  9.54 (d,  $J$  = 3.6 Hz, CHO, 1H), 7.51 (s, ArH, 1H), 7.39 (d,  $J$  = 7.7 Hz, ArH, 1H), 7.16 (d,  $J$  = 7.7 Hz, ArH, 1H), 3.10 (dd,  $J$  = 16.9, 9.0 Hz, CH<sub>A</sub>H<sub>B</sub>, 1H), 2.93 (ddd,  $J$  = 18.3, 2  $\times$  9.2 Hz, CH<sub>A</sub>H<sub>B</sub>, 1H), 2.54 (br d,  $J$  = 13.4 Hz, CH<sub>A</sub>H<sub>B</sub>, 1H), 2.45 (br d,  $J$  = 12.7 Hz, CH<sub>A</sub>H<sub>B</sub>, 1H), 2.39-2.25 (m, CHCHO, ArCH<sub>A</sub>H<sub>B</sub>, 2H), 2.12-1.74 (m, CH<sub>2</sub>, 5  $\times$  CH<sub>A</sub>H<sub>B</sub>, CH<sub>A</sub>H<sub>B</sub>, 8H), 1.74-1.15 (m, 3  $\times$  CH<sub>2</sub>, 3  $\times$  CH<sub>A</sub>H<sub>B</sub>, ArCH<sub>A</sub>H<sub>B</sub>, 2  $\times$  CH, 12H), 1.44 (s, CH<sub>3</sub>, 3H), 1.39 (s, CH<sub>3</sub>, 3H), 1.12 (s, CH<sub>3</sub>, 3H), 1.05-0.80 (m, 3  $\times$  CH<sub>A</sub>H<sub>B</sub>, 3  $\times$  CH, 6H). <sup>13</sup>C NMR (125 MHz, CDCl<sub>3</sub>)  $\delta$  205.0, 149.3, 140.5, 129.9, 129.3, 128.1, 123.4, 123.2, 119.5, 109.8, 57.9, 56.9 (2  $\times$  CH), 51.1, 49.9, 46.3, 39.6, 39.5, 38.7, 38.5, 38.22, 38.21, 37.9, 37.72, 37.68, 36.7, 28.6, 26.5, 23.7, 22.9, 19.8, 19.3, 18.9, 18.8, 18.3, 14.8, 12.6. HRMS (ESI<sup>+</sup>) exact mass calcd for C<sub>37</sub>H<sub>46</sub>N<sub>3</sub>O [M+H]<sup>+</sup> requires  $m/z$  548.3635, found  $m/z$  548.3627. The determination of the enantiomeric excess was unsuccessful under a variety of HPLC and SFC conditions due to extremely low solubility of **17** in common solvents.  $[\alpha]_D^{24} = -25.3$  ( $c$  = 0.68, CHCl<sub>3</sub>).

## 4 Preparation of Cyclization Precursors

### 4.1 General Strategy toward Bicyclization Precursors

All bicyclization substrates were prepared by palladium-catalyzed cross-coupling of vinyl iodide **28**<sup>4</sup> with alkyl metal intermediates derived from homobenzylic iodides following either Knochel's Negishi coupling protocol (**A**)<sup>5</sup> or a *B*-alkyl Suzuki coupling (**B**)<sup>6</sup> (Scheme S1). Known vinyl iodide **28**<sup>4</sup> was prepared in a scalable four-step sequence starting from hexyne consisting of (i) hydroxymethylation,<sup>7</sup> (ii) alkyne isomerization,<sup>8</sup> (iii) silyl protection,<sup>4</sup> and (iv) carboalumination/iodination.<sup>9</sup> Deprotection and oxidation completed substrate synthesis of **6**, **18-22** for organo-SOMO bicyclizations.

**Scheme S1.** Synthetic Access to Bicyclization Substrates.

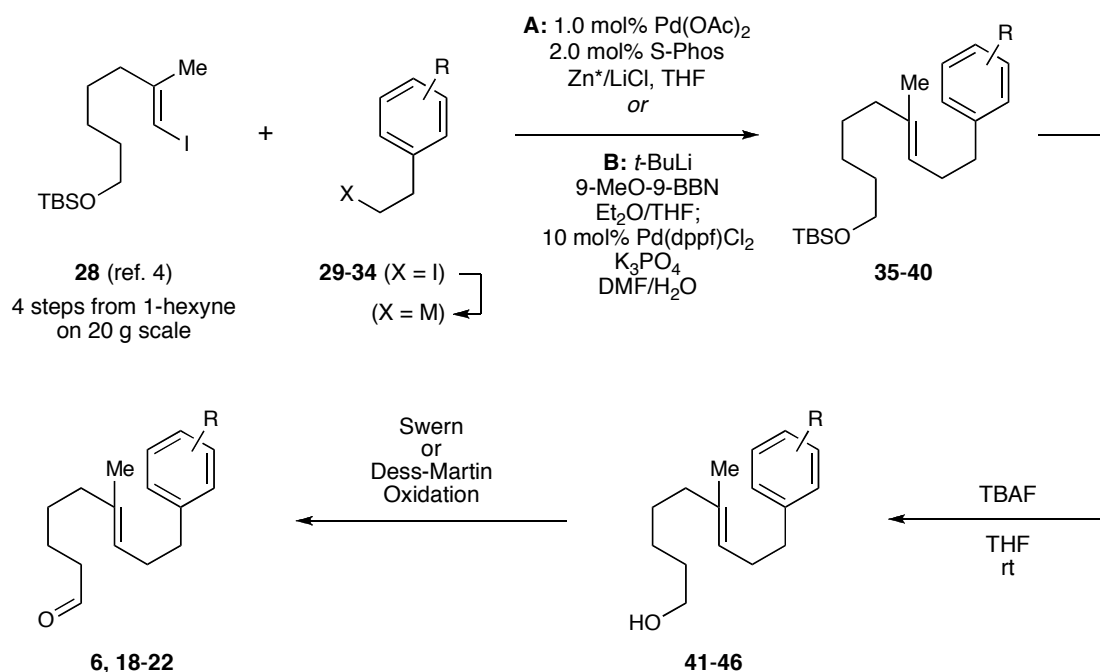

(4) Yakelis, N. A.; Roush, W. R. *Org. Lett.* **2001**, *3*, 957.

(5) a) Manolikakes, G.; Schade, M. A.; Muñoz Hernandez, C.; Mayr, H.; Knochel, P. *Org. Lett.* **2008**, *10*, 2765. b) Krasovskiy, A.; Malakhov, V.; Gavrushin, A.; Knochel, P. *Angew. Chem., Int. Ed.* **2006**, *45*, 6040.

(6) Marshall, J. A.; Jones, B. A. *J. Org. Chem.* **1998**, *63*, 7885.

(7) Li, M.; O'Doherty, G. A. *Org. Lett.* **2006**, *8*, 6087.

(8) Denmark, S. E.; Yang, S.-M. *Tetrahedron* **2004**, *60*, 9695.

(9) Wipf, P.; Lim, S. *Angew. Chem., Int. Ed. Engl.* **1993**, *32*, 1068.

## 4.2 Preparation of Aldehyde 6

### 4.2.1 (*E*)-*tert*-Butyldimethyl(6-methyl-9-phenylnon-6-enyloxy)silane (**35**)

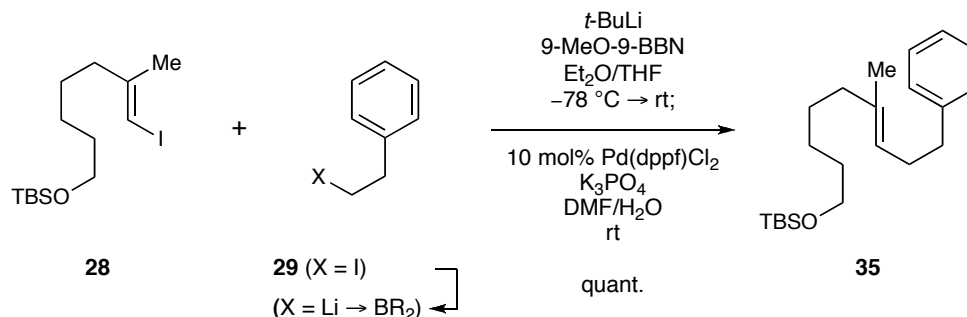

*t*-BuLi (14.6 mL of a 1.7M solution in pentane, 24.0 mmol, 3.30 equiv) was rapidly added to a solution of alkyl iodide **29** (2.20 mL, 3.42 g, 11.3 mmol, 1.50 equiv) in Et<sub>2</sub>O (40 mL) at  $-78^\circ\text{C}$ . After stirring for 3 min, 9-methoxy-9-borabicyclononane (25.8 mL of a 1.0M solution in hexanes, 25.8 mmol, 3.45 equiv) was added in one portion followed by THF (40 mL). The solution was stirred for 10 min at  $-78^\circ\text{C}$  and then allowed to warm to room temperature for 1.5 h. To this mixture, aqueous 3M K<sub>3</sub>PO<sub>4</sub> (12.5 mL, 37.5 mmol, 5.00 equiv), vinyl iodide **28** (2.74 g, 7.50 mmol, 1.00 equiv) in DMF (40 mL), and Pd(dppf)Cl<sub>2</sub>·CH<sub>2</sub>Cl<sub>2</sub> (612 mg, 0.750 mmol, 0.100 equiv) were added sequentially, and the resultant dark solution was stirred for 5 h. Upon addition of water (100 mL), the reaction mixture was extracted with Et<sub>2</sub>O (3 × 75 mL). The combined organic layers were washed with water (2 × 30 mL) and brine (30 mL), dried over MgSO<sub>4</sub>, and concentrated *in vacuo*. Purification of the crude mixture by flash chromatography (1% EtOAc/hexanes) furnished title compound **35** (2.60 g, quant. yield, approx. 90% purity). Remaining impurities were separated after the following deprotection step.

<sup>1</sup>H NMR (500 MHz, CDCl<sub>3</sub>) δ 7.30-7.24 (m, ArH, 2H), 7.21-7.15 (m, ArH, 3H), 5.18 (t, *J* = 7.3 Hz, CH<sub>vin</sub>, 1H), 3.60 (t, *J* = 7.6 Hz, CH<sub>2</sub>OSi, 2H), 2.64 (t, *J* = 7.6 Hz, ArCH<sub>2</sub>, 2H), 2.30 (dt, *J* = 2 × 7.8 Hz, CH<sub>2</sub>CH<sub>vin</sub>, 2H), 1.97 (t, *J* = 7.4 Hz, CH<sub>2</sub>(CH<sub>3</sub>)C=C, 2H), 1.54 (s, CH<sub>3</sub>, 3H), 1.52 (tt, *J* = 2 × 7.7 Hz, CH<sub>2</sub>CH<sub>2</sub>O, 2H), 1.52 (tt, *J* = 2 × 7.5 Hz, CH<sub>2</sub>(CH<sub>2</sub>)<sub>3</sub>O, 2H), 1.27 (tt, *J* = 2 × 7.4 Hz, CH<sub>2</sub>(CH<sub>2</sub>)<sub>2</sub>O, 2H), 0.90 (s, SiC(CH<sub>3</sub>)<sub>3</sub>, 9H), 0.05 (s, Si(CH<sub>3</sub>)<sub>2</sub>, 6H). <sup>13</sup>C NMR (125 MHz, CDCl<sub>3</sub>)

$\delta$  142.4, 136.0, 128.5, 128.2, 125.6, 123.5, 63.3, 39.7, 36.2, 32.8, 30.0, 27.7, 26.0, 25.4, 18.4, 15.9, -5.2.

#### 4.2.2 (*E*)-6-Methyl-9-phenylnon-6-en-1-ol (**41**)

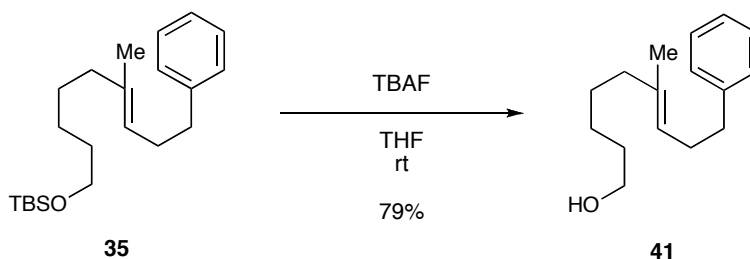

TBAF (9.0 mL of a 1.0M solution in THF, 9.0 mmol, 1.20 equiv) was added slowly to a solution of silyl ether **35** (2.60 g, 7.50 mmol, 1.00 equiv) in THF (40 mL) at room temperature. After stirring had been continued for 6 h, water (50 mL) and sat.  $\text{NH}_4\text{Cl}$  (30 mL) were added and the aqueous layer was extracted with EtOAc (3  $\times$  50 mL). The combined organic layers were washed with brine (30 mL), dried ( $\text{MgSO}_4$ ) and concentrated *in vacuo*. Purification of the crude material by flash chromatography (20% EtOAc/hexanes) furnished title compound **41** (1.36 g, 79% yield over two steps) as a colorless oil.

IR (ATR)  $\nu$  ( $\text{cm}^{-1}$ ) 3320, 3062, 3026, 2929, 2856, 1666, 1603, 1495, 1453, 1381, 1152, 1073, 1052, 1030, 956, 885, 843, 745, 695.  $^1\text{H}$  NMR (500 MHz,  $\text{CDCl}_3$ )  $\delta$  7.30-7.24 (m, ArH, 2H), 7.20-7.15 (m, ArH, 3H), 5.17 (t,  $J = 7.0$  Hz,  $\text{CH}_{\text{vin}}$ , 1H), 3.63 (t,  $J = 6.7$  Hz,  $\text{CH}_2\text{OH}$ , 2H), 2.63 (t,  $J = 7.6$  Hz, Ar $\text{CH}_2$ , 2H), 2.30 (dt,  $J = 2 \times 7.5$  Hz,  $\text{CH}_2\text{CH}_{\text{vin}}$ , 2H), 1.97 (t,  $J = 7.5$  Hz,  $\text{CH}_2(\text{CH}_3)\text{C}=\text{C}$ , 2H), 1.56 (tt,  $J = 2 \times 7.3$  Hz,  $\text{CH}_2\text{CH}_2\text{OH}$ , 2H), 1.53 (s,  $\text{CH}_3$ , 3H), 1.40 (tt,  $J = 2 \times 7.3$  Hz,  $\text{CH}_2(\text{CH}_2)_3\text{O}$ , 2H), 1.29 (tt,  $J = 2 \times 7.1$  Hz,  $\text{CH}_2(\text{CH}_2)_2\text{O}$ , 2H).  $^{13}\text{C}$  NMR (125 MHz,  $\text{CDCl}_3$ )  $\delta$  142.4, 135.9, 128.5, 128.3, 125.7, 123.7, 63.1, 39.6, 36.2, 32.8, 30.0, 27.7, 25.4, 15.9. HRMS (ESI $^+$ ) exact mass calcd for  $\text{C}_{16}\text{H}_{25}\text{O}$  [ $\text{M}+\text{H}$ ] $^+$  requires  $m/z$  233.1900, found  $m/z$  233.1896.

4.2.3 (E)-6-Methyl-9-phenylnon-6-en-1-al (**6**)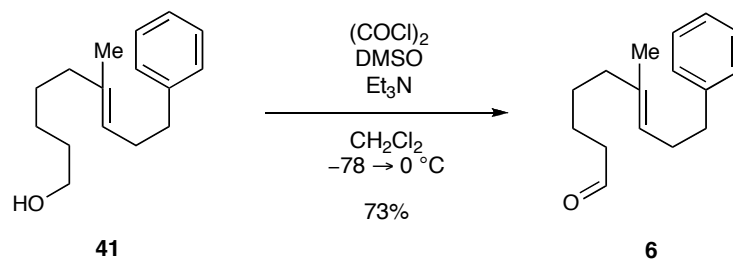

Oxalyl chloride (0.48 mL, 0.70 g, 5.50 mmol, 1.10 equiv) was dissolved in  $\text{CH}_2\text{Cl}_2$  (50 mL) and cooled to  $-78 \text{ } ^\circ\text{C}$ . DMSO (0.85 mL, 0.94 g, 12.0 mmol, 2.40 equiv) was added dropwise and the resultant solution stirred for 10 min. Subsequently, a solution of alcohol **41** (1.15 g, 5.00 mmol, 1.00 equiv) in  $\text{CH}_2\text{Cl}_2$  (5 mL) was added slowly and stirring was continued for 10 min at  $-78 \text{ } ^\circ\text{C}$ . Upon addition of  $\text{Et}_3\text{N}$  (3.30 mL, 2.42 g, 24.0 mmol, 4.80 equiv), the reaction mixture was allowed to warm to  $0 \text{ } ^\circ\text{C}$  within 1 h. After addition of water (50 mL) and aqueous 2M HCl (20 mL), the aqueous layer was extracted with EtOAc (3  $\times$  50 mL). The combined organic layers were washed with brine (30 mL), dried ( $\text{MgSO}_4$ ) and concentrated *in vacuo*. Purification of the crude material by flash chromatography (10% EtOAc/hexanes) furnished title compound **6** (841 mg, 73% yield) as a colorless oil.

IR (ATR)  $\nu$  ( $\text{cm}^{-1}$ ) 3061, 3026, 2930, 2857, 2717, 1723, 1603, 1495, 1453, 1409, 1386, 1242, 1158, 1107, 1078, 1030, 1002, 844, 746, 698.  $^1\text{H}$  NMR (500 MHz,  $\text{CDCl}_3$ )  $\delta$  9.76, (t,  $J = 1.7 \text{ Hz}$ , CHO, 1H), 7.30-7.24 (m, ArH, 2H), 7.21-7.15 (m, ArH, 3H), 5.18 (t,  $J = 7.0 \text{ Hz}$ ,  $\text{CH}_{\text{vin}}$ , 1H), 2.64 (t,  $J = 7.5 \text{ Hz}$ , Ar $\text{CH}_2$ , 2H), 2.41 (td,  $J = 7.4, 1.7 \text{ Hz}$ ,  $\text{CH}_2\text{CHO}$ , 2H), 2.31 (dt,  $J = 2 \times 7.5 \text{ Hz}$ ,  $\text{CH}_2\text{CH}_{\text{vin}}$ , 2H), 1.99 (t,  $J = 7.5 \text{ Hz}$ ,  $\text{CH}_2(\text{CH}_3)\text{C}=\text{C}$ , 2H), 1.57 (tt,  $J = 2 \times 7.5 \text{ Hz}$ ,  $\text{CH}_2\text{CH}_2\text{CHO}$ , 2H), 1.53 (s,  $\text{CH}_3$ , 3H), 1.41 (tt,  $J = 2 \times 7.5 \text{ Hz}$ ,  $\text{CH}_2(\text{CH}_2)_2\text{CHO}$ , 2H).  $^{13}\text{C}$  NMR (125 MHz,  $\text{CDCl}_3$ )  $\delta$  203.0, 142.4, 135.9, 128.5, 128.3, 125.8, 124.1, 43.9, 39.3, 36.1, 29.9, 27.3, 21.6, 15.8. HRMS (ESI $^+$ ) exact mass calcd for  $\text{C}_{16}\text{H}_{23}\text{O}$  [ $\text{M}+\text{H}$ ] $^+$  requires  $m/z$  231.1743, found  $m/z$  231.1744.

### 4.3 Preparation of Aldehyde 18

#### 4.3.1 4-(2-Iodoethyl)benzonitrile (**30**)

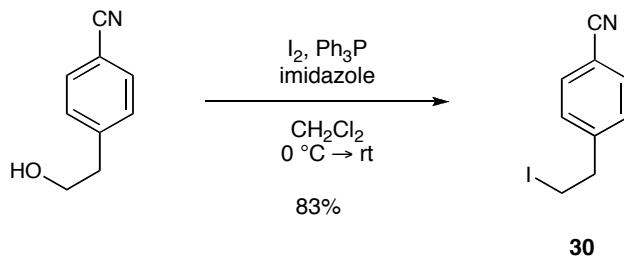

Iodine (25.9 g, 102 mmol, 1.50 equiv) was added to a solution of  $\text{Ph}_3\text{P}$  (26.8 g, 102 mmol, 1.50 equiv) in  $\text{CH}_2\text{Cl}_2$  (300 mL) at 0 °C and stirred for 10 min. Upon addition of imidazole (11.6 g, 170 mmol, 2.50 equiv) and further 10 min of stirring, a solution of 2-(4-cyanophenyl)ethanol<sup>10</sup> (10.0 g, 68.0 mmol, 1.00 equiv) in  $\text{CH}_2\text{Cl}_2$  (40 mL) was added via syringe followed by stirring for 1 h at room temperature. The reaction mixture was washed with aqueous  $\text{Na}_2\text{SO}_3$  (2 × 100 mL) and the aqueous layer extracted with  $\text{CH}_2\text{Cl}_2$  (2 × 100 mL). The combined organic layers were dried ( $\text{MgSO}_4$ ) and concentrated *in vacuo*. The residual was treated with PE/ $\text{Et}_2\text{O}$  (1:1, 300 mL) to precipitate  $\text{Ph}_3\text{PO}$ . Filtration, removal of the volatiles *in vacuo*, and purification by flash chromatography (5% EtOAc/hexanes) furnished iodide **30** (14.5 g, 83% yield) as a yellowish solid.

$^1\text{H}$  NMR (500 MHz,  $\text{CDCl}_3$ )  $\delta$  7.63 (d,  $J = 8.1$  Hz, ArH, 2H), 7.31 (d,  $J = 8.0$  Hz, ArH, 2H), 3.36 (t,  $J = 7.5$  Hz,  $\text{CH}_2$ , 2H), 1.78 (t,  $J = 8.0$  Hz,  $\text{CH}_2$ , 2H).  $^{13}\text{C}$  NMR (125 MHz,  $\text{CDCl}_3$ )  $\delta$  145.7, 132.6, 129.3, 118.9, 111.0, 39.9, 3.9. HRMS (ESI<sup>+</sup>) exact mass calcd for  $[\text{M}+\text{H}]^+$  ( $\text{C}_9\text{H}_9\text{IN}$ ) requires  $m/z$  257.9776, found  $m/z$  257.9774.

(10) Prepared from 2-(4-aminophenyl)ethanol: Wagner, G.; Vieweg, H. *Pharmazie* **1982**, 37, 13.



4.3.2 (*E*)-4-(9-(*tert*-Butyldimethylsilyloxy)-4-methylnon-3-enyl)benzonitrile (**36**)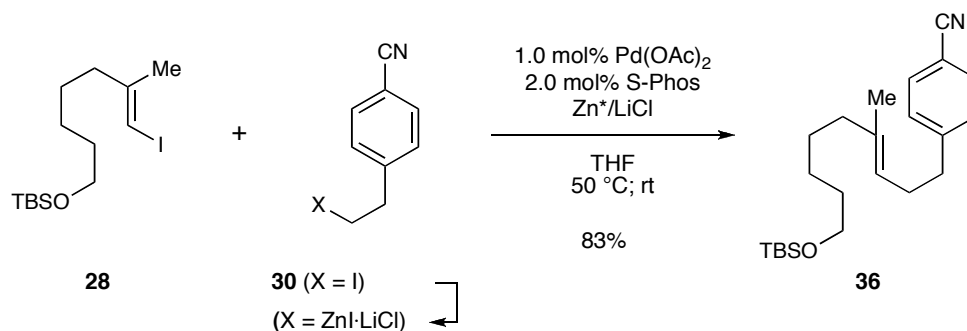

Anhydrous LiCl (636 mg, 15.0 mmol, 1.25 equiv) was placed in an argon-flushed 25-mL Schlenk flask and dried for 30 min at 150-180 °C under high vacuum (<1 torr) with slow stirring. Upon addition of zinc powder (325 mesh, 1.47 g, 22.5 mmol, 1.88 equiv) heating under high vacuum was continued for 30 min. After cooling to room temperature and backfilling with argon, the mixture was suspended with THF (10 mL). Subsequently, the zinc powder was activated by sequential addition of 1,2-dibromoethane (65  $\mu$ L, 140 mg, 0.75 mmol, 0.060 equiv), TMSCl (3 drops), and iodine (15 drops of a 1M solution in THF); each addition followed by gentle heating to reflux with a heat gun. A solution of iodide **30** (3.86 g, 15.0 mmol, 1.25 equiv) in THF (10 mL) was added portionwise at room temperature and followed by heating of the reaction mixture to 50 °C for 4 h. The thus generated solution of homobenzylic iodide was allowed to cool to room temperature and separated via syringe from remaining zinc powder.

In a separate 50-mL Schlenk flask, Pd(OAc)<sub>2</sub> (26.9 mg, 0.120 mmol, 0.0100 equiv) and S-Phos (98.5 mg, 0.240 mmol, 0.0200 equiv) was dissolved in THF (3.0 mL) and a solution of vinyl iodide **28** (4.42 g, 12.0 mmol, 1.00 equiv) in THF (3.0 mL) was added. The previously prepared solution of homobenzylic zinc reagent was quickly added via syringe leading to an exothermic reaction. Further stirring at room temperature for 3 h was followed by aqueous work-up with sat. NH<sub>4</sub>Cl (50 mL) and extraction with EtOAc (4  $\times$  30 mL). The combined organic layers were washed with brine (30 mL), dried (MgSO<sub>4</sub>), and concentrated under reduced pressure. Purification by flash chromatography (5% EtOAc/hexanes) furnished title compound **36** (3.70 g, 83% yield) as a yellowish oil.

IR (ATR)  $\nu$  (cm<sup>-1</sup>) 2929, 2856, 2228, 1668, 1608, 1504, 1471, 1462, 1413, 1386, 1360, 1254, 1176, 1096, 1020, 1006, 938, 917, 829, 774, 710, 661. <sup>1</sup>H NMR (500 MHz, CDCl<sub>3</sub>)  $\delta$  7.56 (d,  $J$  = 7.8 Hz, ArH, 2H), 7.28 (d,  $J$  = 8.0 Hz, ArH, 2H), 5.11 (t,  $J$  = 6.7 Hz, CH<sub>vin</sub>, 1H), 3.59 (t,  $J$  = 6.5 Hz, CH<sub>2</sub>OSi, 2H), 2.69 (t,  $J$  = 7.5 Hz, ArCH<sub>2</sub>, 2H), 2.31 (dt,  $J$  = 2  $\times$  7.4 Hz, CH<sub>2</sub>CH<sub>vin</sub>, 2H), 1.95 (t,  $J$  = 7.4 Hz, CH<sub>2</sub>(CH<sub>3</sub>)C=C, 2H), 1.51 (tt,  $J$  = 2  $\times$  6.8 Hz, CH<sub>2</sub>CH<sub>2</sub>OSi, 2H), 1.49 (s, CH<sub>3</sub>, 3H), 1.36 (tt,  $J$  = 2  $\times$  7.6 Hz, CH<sub>2</sub>(CH<sub>2</sub>)<sub>3</sub>OSi, 2H), 1.27 (tt,  $J$  = 2  $\times$  7.6 Hz, CH<sub>2</sub>(CH<sub>2</sub>)<sub>2</sub>OSi, 2H), 0.89 (s, SiC(CH<sub>3</sub>)<sub>3</sub>, 9H), 0.05 (s, Si(CH<sub>3</sub>)<sub>2</sub>, 6H). <sup>13</sup>C NMR (125 MHz, CDCl<sub>3</sub>)  $\delta$  148.1, 137.0, 132.1, 129.4, 122.5, 119.3, 109.6, 63.3, 39.7, 36.3, 32.8, 29.4, 27.8, 26.1, 25.5, 18.5, 15.9, -5.2. HRMS (ESI<sup>+</sup>) exact mass calcd for C<sub>23</sub>H<sub>38</sub>NOSi [M+H]<sup>+</sup> requires  $m/z$  372.2717, found  $m/z$  372.2720.

#### 4.3.3 (E)-4-(9-Hydroxy-4-methylnon-3-enyl)benzonitrile (**42**)

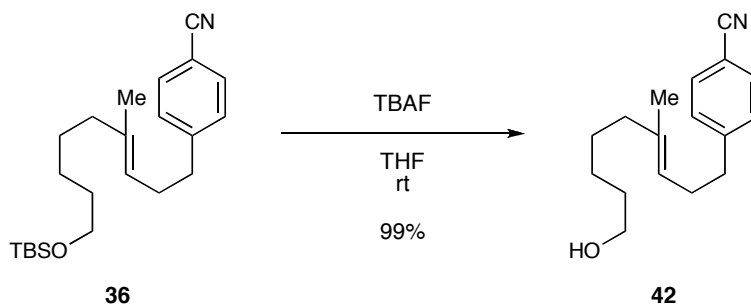

TBAF (12.0 mL of a 1.0M solution in THF, 12.0 mmol, 1.20 equiv) was added slowly to a solution of silyl ether **36** (3.70 g, 10.0 mmol, 1.00 equiv) in THF (60 mL) at room temperature. After stirring had been continued for 6 h, water (60 mL) and sat. NH<sub>4</sub>Cl (40 mL) were added and the aqueous layer was extracted with EtOAc (3  $\times$  60 mL). The combined organic layers were washed with brine (40 mL), dried (MgSO<sub>4</sub>) and concentrated *in vacuo*. Purification of the crude material by flash chromatography (20% EtOAc/hexanes) furnished title compound **42** (2.58 g, 99% yield) as a colorless oil.

IR (ATR)  $\nu$  (cm<sup>-1</sup>) 3381, 2930, 2857, 2227, 1665, 1607, 1504, 1451, 1413, 1383, 1176, 1149, 1107, 1050, 1020, 954, 822, 753, 666. <sup>1</sup>H NMR (500 MHz, CDCl<sub>3</sub>)  $\delta$  7.56 (d,  $J$  = 8.2 Hz, ArH, 2H), 7.27 (d,  $J$  = 9.3 Hz, ArH, 2H), 5.10 (t,  $J$  = 7.1 Hz, CH<sub>vin</sub>, 1H), 3.63 (t,  $J$  = 6.7 Hz, CH<sub>2</sub>OH,

2H), 2.69 (t,  $J = 7.5$  Hz, ArCH<sub>2</sub>, 2H), 2.30 (dt,  $J = 2 \times 7.5$  Hz, CH<sub>2</sub>CH<sub>vin</sub>, 2H), 1.96 (t,  $J = 7.3$  Hz, CH<sub>2</sub>(CH<sub>3</sub>)C=C, 2H), 1.56 (tt,  $J = 2 \times 7.0$  Hz, CH<sub>2</sub>CH<sub>2</sub>OH, 2H), 1.49 (s, CH<sub>3</sub>, 3H), 1.38 (tt,  $J = 2 \times 7.8$  Hz, CH<sub>2</sub>(CH<sub>2</sub>)<sub>3</sub>OH, 2H), 1.33-1.26 (m, CH<sub>2</sub>(CH<sub>2</sub>)<sub>2</sub>OH, 2H). <sup>13</sup>C NMR (125 MHz, CDCl<sub>3</sub>)  $\delta$  148.1, 136.8, 132.1, 129.4, 122.6, 119.3, 109.5, 63.1, 39.6, 36.3, 32.7, 29.3, 27.7, 25.4, 15.9. HRMS (ESI<sup>+</sup>) exact mass calcd for C<sub>17</sub>H<sub>24</sub>NO [M+H]<sup>+</sup> requires  $m/z$  258.1852, found  $m/z$  258.1855.

#### 4.3.4 (*E*)-4-(4-Methyl-9-oxonon-3-enyl)benzonitrile (**18**)

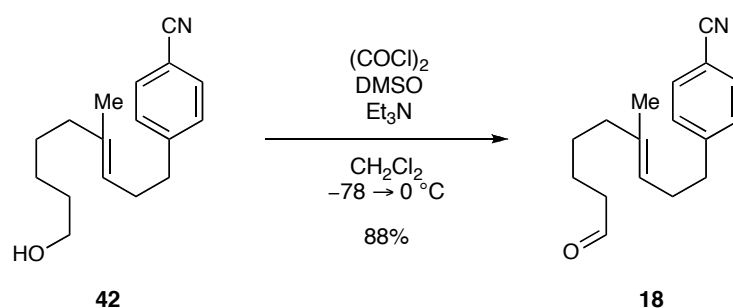

Oxalyl chloride (0.97 mL, 1.40 g, 11.0 mmol, 1.10 equiv) was dissolved in CH<sub>2</sub>Cl<sub>2</sub> (80 mL) and cooled to  $-78^\circ\text{C}$ . DMSO (1.70 mL, 1.88 g, 24.0 mmol, 2.40 equiv) was added dropwise and the resultant solution stirred for 10 min. Subsequently, a solution of alcohol **42** (2.58 g, 10.0 mmol, 1.00 equiv) in CH<sub>2</sub>Cl<sub>2</sub> (10 mL) was added slowly and stirring was continued for 10 min at  $-78^\circ\text{C}$ . Upon addition of Et<sub>3</sub>N (6.70 mL, 4.86 g, 48.0 mmol, 4.80 equiv), the reaction mixture was allowed to warm to  $0^\circ\text{C}$  within 1 h. After addition of water (100 mL) and aqueous 2M HCl (40 mL), the aqueous layer was extracted with EtOAc (3  $\times$  100 mL). The combined organic layers were washed with brine (50 mL), dried (MgSO<sub>4</sub>) and concentrated *in vacuo*. Purification of the crude material by flash chromatography (20% EtOAc/hexanes) furnished title compound **18** (2.25 g, 88% yield) as a colorless oil.

IR (ATR)  $\nu$  (cm<sup>-1</sup>) 2931, 2859, 2718, 2226, 1721, 1607, 1504, 1448, 1412, 1387, 1291, 1176, 1108, 1020, 823, 744, 693. <sup>1</sup>H NMR (500 MHz, CDCl<sub>3</sub>)  $\delta$  9.76 (t,  $J = 1.6$  Hz, CHO, 1H), 7.56 (d,  $J = 8.3$  Hz, ArH, 2H), 7.27 (d,  $J = 8.3$  Hz, ArH, 2H), 5.11 (t,  $J = 6.6$  Hz, CH<sub>vin</sub>, 1H), 2.69 (t,  $J = 7.5$  Hz, ArCH<sub>2</sub>, 2H), 2.42 (td,  $J = 7.3, 1.6$  Hz, CH<sub>2</sub>CHO, 2H), 2.30 (dt,  $J = 2 \times 7.4$  Hz, CH<sub>2</sub>CH<sub>vin</sub>,

2H), 1.97 (t,  $J = 7.5$  Hz,  $\text{CH}_2(\text{CH}_3)\text{C}=\text{C}$ , 2H), 1.55 (tt,  $J = 2 \times 7.8$  Hz,  $\text{CH}_2\text{CH}_2\text{CHO}$ , 2H), 1.49 (s,  $\text{CH}_3$ , 3H), 1.38 (tt,  $J = 2 \times 7.2$  Hz,  $\text{CH}_2(\text{CH}_2)_2\text{CHO}$ , 2H).  $^{13}\text{C}$  NMR (125 MHz,  $\text{CDCl}_3$ )  $\delta$  202.9, 148.0, 136.2, 132.1, 129.4, 123.0, 119.3, 109.6, 43.8, 39.3, 36.2, 29.3, 27.2, 21.6, 15.8. HRMS (ESI<sup>+</sup>) exact mass calcd for  $\text{C}_{17}\text{H}_{22}\text{NO}$   $[\text{M}+\text{H}]^+$  requires  $m/z$  256.1696, found  $m/z$  256.1696.

## 4.4 Preparation of Aldehyde 19

### 4.4.1 4-(2-Iodoethyl)-2,3-dihydro-1H-inden-1-one (**31**)

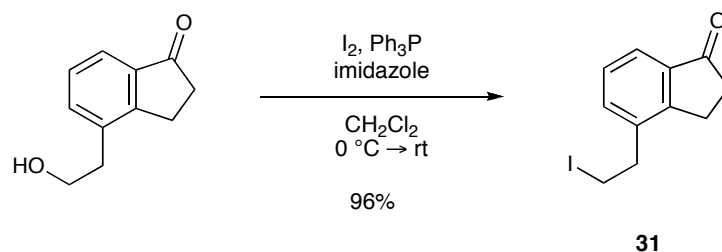

Iodine (2.82 g, 11.1 mmol, 1.50 equiv) was added to a solution of  $\text{Ph}_3\text{P}$  (2.91 g, 11.1 mmol, 1.50 equiv) in  $\text{CH}_2\text{Cl}_2$  (40 mL) at  $0\text{ }^\circ\text{C}$  and stirred for 10 min. Upon addition of imidazole (1.26 g, 18.5 mmol, 2.50 equiv) and further 10 min of stirring, a solution of 4-(2-hydroxyethyl)-2,3-dihydro-1H-inden-1-one<sup>11</sup> (1.30 g, 7.40 mmol, 1.00 equiv) in  $\text{CH}_2\text{Cl}_2$  (5.0 mL) was added via syringe followed by stirring for 1 h at room temperature. The reaction mixture was washed with aqueous  $\text{Na}_2\text{SO}_3$  ( $2 \times 20$  mL) and the aqueous layer extracted with  $\text{CH}_2\text{Cl}_2$  ( $2 \times 20$  mL). The combined organic layers were dried ( $\text{MgSO}_4$ ) and concentrated *in vacuo*. Purification by flash chromatography (10% EtOAc/hexanes) furnished iodide **31** (2.03 g, 96% yield) as a yellowish solid.

IR (ATR)  $\nu$  ( $\text{cm}^{-1}$ ) 3028, 2956, 2917, 2850, 2780, 1696, 1598, 1585, 1473, 1448, 1433, 1397, 1332, 1275, 1257, 1230, 1180, 1168, 1154, 1115, 1048, 990, 976, 933, 841, 818, 783, 741, 715, 650, 613.  $^1\text{H}$  NMR (500 MHz,  $\text{CDCl}_3$ )  $\delta$  7.70 (d,  $J = 7.5$  Hz, ArH, 1H), 7.45 (d,  $J = 7.1$  Hz, ArH, 1H), 7.38 (dd,  $J = 2 \times 7.5$  Hz, ArH, 1H), 3.39 (t,  $J = 7.4$  Hz,  $\text{CH}_2$ , 2H), 3.28 (t,  $J = 7.4$  Hz,  $\text{CH}_2$ ,

(11) Nakada, Y.; Ohno, S.; Yoshimoto, M.; Yura, Y. *Agric. Biol. Chem.* **1978**, *42*, 1365.

2H), 3.13-3.08 (m, CH<sub>2</sub>, 2H), 2.76-2.71 (m, CH<sub>2</sub>, 2H). <sup>13</sup>C NMR (125 MHz, CDCl<sub>3</sub>) δ 207.0, 153.4, 138.4, 137.5, 134.3, 128.0, 122.6, 36.14, 36.10, 24.4, 3.4. HRMS (ESI<sup>+</sup>) exact mass calcd for C<sub>11</sub>H<sub>12</sub>IO [M+H]<sup>+</sup> requires *m/z* 286.9927, found *m/z* 286.9926.

#### 4.4.2 (*E*)-4-(9-(*tert*-Butyldimethylsilyloxy)-4-methylnon-3-enyl)-2,3-dihydro-1*H*-inden-1-one (**37**)

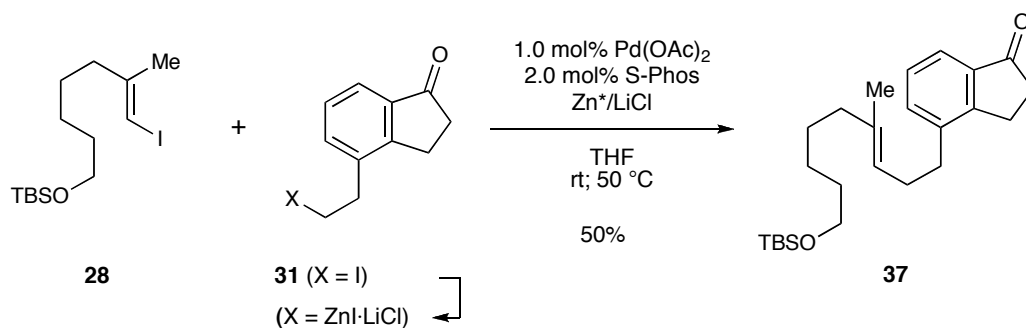

Anhydrous LiCl (297 mg, 7.00 mmol, 1.25 equiv) was placed in an argon-flushed 25-mL Schlenk flask and dried for 30 min at 150-180 °C under high vacuum (<1 torr) with slow stirring. Upon addition of zinc powder (325 mesh, 686 mg, 10.5 mmol, 1.88 equiv) heating under high vacuum was continued for 30 min. After cooling to room temperature and backfilling with argon, the mixture was suspended with THF (5.0 mL). Subsequently, the zinc powder was activated by sequential addition of 1,2-dibromoethane (30 μL, 66 mg, 0.35 mmol, 0.060 equiv), TMSCl (2 drops), and iodine (7 drops of a 1M solution in THF); each addition followed by gentle heating to reflux with a heat gun. A solution of iodide **31** (2.03 g, 7.00 mmol, 1.25 equiv) in THF (5.0 mL) was added portionwise at room temperature and stirring continued for 3.5 h. The thus generated solution of homobenzylic iodide was separated via syringe from remaining zinc powder.

In a separate 25-mL Schlenk flask, Pd(OAc)<sub>2</sub> (15.7 mg, 0.0700 mmol, 0.0100 equiv) and S-Phos (57.4 mg, 0.140 mmol, 0.0200 equiv) was dissolved in THF (5.0 mL) and a solution of vinyl iodide **28** (2.06 g, 5.60 mmol, 1.00 equiv) in THF (3.0 mL) was added. The previously prepared solution of homobenzylic zinc reagent was quickly added via syringe leading to an exothermic reaction. Further stirring at 50 °C for 3 h was followed by aqueous work-up with sat. NH<sub>4</sub>Cl (30 mL) and extraction with EtOAc (4 × 20 mL). The combined organic layers were washed with brine (20 mL), dried (MgSO<sub>4</sub>), and concentrated *in vacuo*. Purification by flash

chromatography (3%→10% EtOAc/hexanes) furnished title compound **37** (1.12 g, 50% yield) as a yellowish oil.

IR (ATR)  $\nu$  (cm<sup>-1</sup>) 2927, 2855, 1713, 1604, 1588, 1471, 1462, 1435, 1405, 1386, 1360, 1332, 1270, 1250, 1153, 1096, 1046, 1005, 982, 938, 911, 833, 773, 708, 679, 660. <sup>1</sup>H NMR (500 MHz, CDCl<sub>3</sub>)  $\delta$  7.63 (d,  $J = 7.5$  Hz, ArH, 1H), 7.42 (d,  $J = 7.9$  Hz, ArH, 1H), 7.33 (dd,  $J = 2 \times 7.5$  Hz, ArH, 1H), 5.18 (t,  $J = 7.1$  Hz, CH<sub>vin</sub>, 1H), 3.60 (t,  $J = 6.6$  Hz, CH<sub>2</sub>OSi, 2H), 3.13-3.04 (m, CH<sub>2</sub>, 2H), 2.74-2.65 (m, CH<sub>2</sub>, ArCH<sub>2</sub>CH<sub>2</sub>CH<sub>vin</sub>, 4H), 2.32 (dt,  $J = 2 \times 7.4$  Hz, CH<sub>2</sub>CH<sub>vin</sub>, 2H), 1.96 (t,  $J = 7.4$  Hz, CH<sub>2</sub>(CH<sub>3</sub>)C=C, 2H), 1.55-1.46 (m, CH<sub>2</sub>CH<sub>2</sub>OSi, 2H), 1.51 (s, CH<sub>3</sub>, 3H), 1.37 (tt,  $J = 2 \times 7.6$  Hz, CH<sub>2</sub>(CH<sub>2</sub>)<sub>3</sub>OSi, 2H), 1.27 (tt,  $J = 2 \times 7.4$  Hz, CH<sub>2</sub>(CH<sub>2</sub>)<sub>2</sub>OSi, 2H), 0.89 (s, SiC(CH<sub>3</sub>)<sub>3</sub>, 9H), 0.04 (s, Si(CH<sub>3</sub>)<sub>2</sub>, 6H). <sup>13</sup>C NMR (125 MHz, CDCl<sub>3</sub>)  $\delta$  207.7, 153.8, 140.2, 137.0, 136.8, 134.4, 127.6, 122.9, 121.4, 63.3, 39.7, 36.3, 32.8, 32.1, 28.3, 27.8, 26.1, 25.6, 24.5, 18.5, 15.9, -5.2. HRMS (ESI<sup>+</sup>) exact mass calcd for C<sub>25</sub>H<sub>41</sub>O<sub>2</sub>Si [M+H]<sup>+</sup> requires  $m/z$  401.2870, found  $m/z$  401.2868.

#### 4.4.3 (E)-4-(9-Hydroxy-4-methylnon-3-enyl)-2,3-dihydro-1H-inden-1-one (**43**)

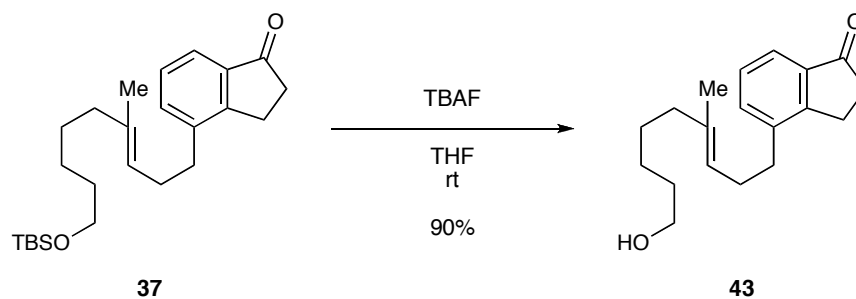

TBAF (3.4 mL of a 1.0M solution in THF, 3.4 mmol, 1.2 equiv) was added slowly to a solution of silyl ether **37** (1.12 g, 2.80 mmol, 1.00 equiv) in THF (30 mL) at room temperature. After stirring had been continued for 1.5 h, water (20 mL) and sat. NH<sub>4</sub>Cl (10 mL) were added and the aqueous layer was extracted with EtOAc (3 × 20 mL). The combined organic layers were washed with brine (20 mL), dried (MgSO<sub>4</sub>) and concentrated *in vacuo*. Purification of the crude material by flash chromatography (35% EtOAc/hexanes) furnished the title compound **43** (725 mg, 90% yield) as a colorless oil.

IR (ATR)  $\nu$  (cm<sup>-1</sup>) 3410, 2927, 2856, 1706, 1602, 1588, 1480, 1434, 1403, 1382, 1333, 1271, 1252, 1154, 1048, 819, 781, 729, 707, 638, 610. <sup>1</sup>H NMR (500 MHz, CDCl<sub>3</sub>)  $\delta$  7.63 (d,  $J$  = 7.6 Hz, ArH, 1H), 7.43 (d,  $J$  = 7.3 Hz, ArH, 1H), 7.31 (dd,  $J$  = 2  $\times$  7.5 Hz, ArH, 1H), 5.18 (t,  $J$  = 7.1 Hz, CH<sub>vin</sub>, 1H), 3.63 (td,  $J$  = 6.5, 4.9 Hz, CH<sub>2</sub>OH, 2H), 3.12-3.04 (m, CH<sub>2</sub>, 2H), 2.75-2.66 (m, CH<sub>2</sub>, ArCH<sub>2</sub>CH<sub>2</sub>CH<sub>vin</sub>, 4H), 2.33 (dt,  $J$  = 2  $\times$  7.5 Hz, CH<sub>2</sub>CH<sub>vin</sub>, 2H), 1.97 (t,  $J$  = 7.3 Hz, CH<sub>2</sub>(CH<sub>3</sub>)C=C, 2H), 1.56 (tt,  $J$  = 2  $\times$  6.9 Hz, CH<sub>2</sub>CH<sub>2</sub>OH, 2H), 1.51 (s, CH<sub>3</sub>, 3H), 1.39 (tt,  $J$  = 2  $\times$  7.1 Hz, CH<sub>2</sub>(CH<sub>2</sub>)<sub>3</sub>OH, 2H), 1.29 (tt,  $J$  = 2  $\times$  7.5 Hz, CH<sub>2</sub>(CH<sub>2</sub>)<sub>2</sub>OH, 2H). <sup>13</sup>C NMR (125 MHz, CDCl<sub>3</sub>)  $\delta$  207.7, 153.8, 140.1, 137.0, 136.6, 134.4, 127.6, 122.9, 121.3, 63.0, 39.6, 36.2, 32.7, 32.0, 28.3, 27.7, 25.4, 24.5, 15.9. HRMS (ESI<sup>+</sup>) exact mass calcd for C<sub>19</sub>H<sub>27</sub>O<sub>2</sub> [M+H]<sup>+</sup> requires  $m/z$  287.2006, found  $m/z$  287.2005.

#### 4.4.4 (E)-6-Methyl-9-(1-oxo-2,3-dihydro-1H-inden-4-yl)non-6-enal (**19**)

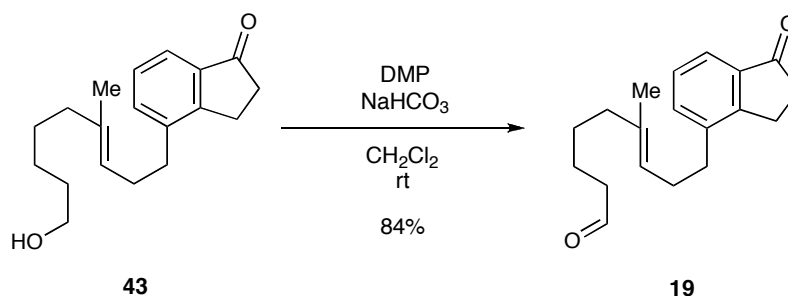

To a solution of alcohol **43** (710 mg, 2.48 mmol, 1.00 equiv) in CH<sub>2</sub>Cl<sub>2</sub> (25 mL) and solid NaHCO<sub>3</sub> (1.04 g, 12.4 mmol, 5.00 equiv) was added Dess-Martin periodinane (1.58 g, 3.72 mmol, 1.50 equiv) and water (1 drop). The resultant mixture was stirred for 20 min at room temperature. Addition of sat. Na<sub>2</sub>CO<sub>3</sub> (20 mL) and aqueous Na<sub>2</sub>S<sub>2</sub>O<sub>3</sub> (10 mL) was followed by extraction with CH<sub>2</sub>Cl<sub>2</sub> (4  $\times$  15 mL). The combined organic layers were washed with brine (15 mL), dried (MgSO<sub>4</sub>) and concentrated *in vacuo*. Purification of the crude material by flash chromatography (20% EtOAc/hexanes) furnished title compound **19** (591 mg, 84% yield) as a colorless oil.

IR (ATR)  $\nu$  (cm<sup>-1</sup>) 2927, 2858, 2722, 1706, 1602, 1588, 1480, 1434, 1405, 1386, 1333, 1270, 1156, 1107, 1047, 984, 819, 782, 755, 707, 639, 608. <sup>1</sup>H NMR (500 MHz, CDCl<sub>3</sub>)  $\delta$  9.77 (br s,

CHO, 1H), 7.62 (d,  $J = 7.5$  Hz, ArH, 1H), 7.42 (d,  $J = 7.4$  Hz, ArH, 1H), 7.32 (dd,  $J = 2 \times 7.5$  Hz, ArH, 1H), 5.19 (t,  $J = 7.1$  Hz, CH<sub>vin</sub>, 1H), 3.12-3.03 (m, CH<sub>2</sub>, 2H), 2.74-2.65 (m, CH<sub>2</sub>, ArCH<sub>2</sub>CH<sub>2</sub>CH<sub>vin</sub>, 4H), 2.43 (t,  $J = 7.3$  Hz, CH<sub>2</sub>CHO, 2H), 2.33 (dt,  $J = 2 \times 7.5$  Hz, CH<sub>2</sub>CH<sub>vin</sub>, 2H), 1.99 (t,  $J = 7.5$  Hz, CH<sub>2</sub>(CH<sub>3</sub>)C=C, 2H), 1.57 (tt,  $J = 2 \times 7.4$  Hz, CH<sub>2</sub>CH<sub>2</sub>CHO, 2H), 1.51 (s, CH<sub>3</sub>, 3H), 1.40 (tt,  $J = 2 \times 7.5$  Hz, CH<sub>2</sub>(CH<sub>2</sub>)<sub>2</sub>CHO, 2H). <sup>13</sup>C NMR (125 MHz, CDCl<sub>3</sub>)  $\delta$  207.6, 202.9, 153.8, 140.1, 137.0, 136.0, 134.4, 127.6, 123.4, 121.4, 43.8, 39.3, 36.2, 32.0, 28.3, 27.3, 24.5, 21.6, 15.8. HRMS (ESI<sup>+</sup>) exact mass calcd for C<sub>19</sub>H<sub>24</sub>O<sub>2</sub>Na [M+Na]<sup>+</sup> requires  $m/z$  307.1669, found  $m/z$  307.1672.

## 4.5 Preparation of Aldehyde 20

### 4.5.1 (*E*)-*tert*-Butyl(9-(3-fluorophenyl)-6-methylnon-6-enyloxy)dimethylsilane (**38**)

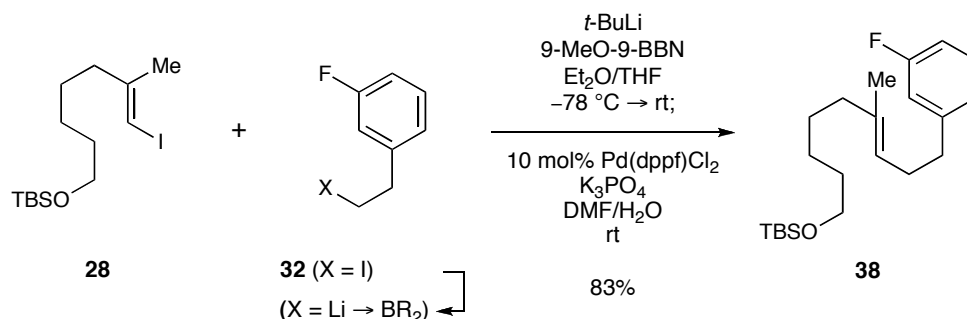

*t*-BuLi (12.9 mL of a 1.7M solution in pentane, 22.0 mmol, 3.30 equiv) was rapidly added to a solution of alkyl iodide **32**<sup>12</sup> (2.50 g, 10.0 mmol, 1.50 equiv) in Et<sub>2</sub>O (40 mL) at  $-78$  °C. After stirring for 3 min, 9-methoxy-9-borabicyclononane (23.0 mL of a 1.0M solution in hexanes, 23.0 mmol, 3.45 equiv) was added in one portion followed by THF (40 mL). The solution was stirred for 10 min at  $-78$  °C and then allowed to warm to room temperature for 1.5 h. To this mixture, aqueous 3M K<sub>3</sub>PO<sub>4</sub> (11.0 mL, 33.4 mmol, 5.0 equiv), vinyl iodide **28** (2.50 g, 6.67 mmol, 1.00 equiv) in DMF (40 mL), and Pd(dppf)Cl<sub>2</sub>·CH<sub>2</sub>Cl<sub>2</sub> (545 mg, 0.670 mmol, 0.100 equiv) were added sequentially, and the resultant dark solution was stirred for 5 h. Upon addition of water (100 mL), the reaction mixture was extracted with Et<sub>2</sub>O (3 × 75 mL). The combined organic

(12) Avery, M. A.; Alvim-Gaston, M.; Vroman, J. A.; Wu, B.; Ager, A.; Peters, W.; Robinson, B. L.; Charman, W. J. *Med. Chem.* **2002**, *45*, 4321.



layers were washed with water (2 × 30 mL) and brine (30 mL), dried over MgSO<sub>4</sub>, and concentrated *in vacuo*. Purification of the crude mixture by flash chromatography (2% EtOAc/hexanes) furnished title compound **38** (2.02 g, 83% yield, approx. 90% purity). The obtained silyl ether was directly subjected to the following deprotection step.

#### 4.5.2 (*E*)-9-(3-Fluorophenyl)-6-methylnon-6-en-1-ol (**44**)

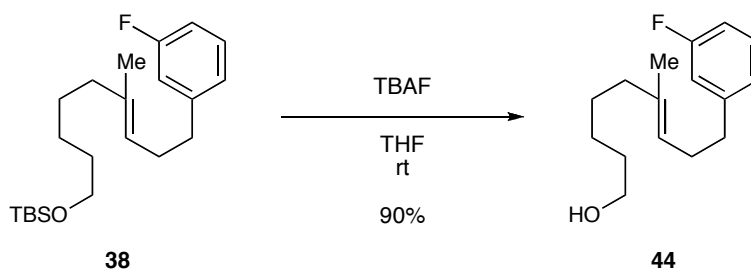

TBAF (6.6 mL of a 1.0M solution in THF, 6.6 mmol, 1.2 equiv) was added slowly to a solution of silyl ether **38** (2.02 g, 5.54 mmol, 1.00 equiv) in THF (50 mL) at room temperature. After stirring had been continued for 1.5 h, water (40 mL) and sat. NH<sub>4</sub>Cl (20 mL) were added and the aqueous layer was extracted with EtOAc (3 × 40 mL). The combined organic layers were washed with brine (40 mL), dried (MgSO<sub>4</sub>) and concentrated *in vacuo*. Purification of the crude material by flash chromatography (20% EtOAc/hexanes) furnished title compound **44** (1.15 g, 90% yield) as a colorless oil.

IR (ATR)  $\nu$  (cm<sup>-1</sup>) 3334, 2930, 2857, 1615, 1588, 1487, 1448, 1382, 1254, 1138, 1072, 1051, 1012, 962, 938, 886, 863, 780, 742, 690. <sup>1</sup>H NMR (500 MHz, CDCl<sub>3</sub>)  $\delta$  7.23 (ddd,  $J = 2 \times 7.4$  Hz,  $J_{\text{H,F}} = 7.4$  Hz, ArH, 1H), 6.96 (d,  $J = 7.5$  Hz, ArH, 1H), 6.92-6.83 (m, ArH, 2H), 5.14 (t,  $J = 7.0$  Hz, CH<sub>vin</sub>, 1H), 3.64 (t,  $J = 6.7$  Hz, CH<sub>2</sub>OH, 2H), 2.63 (t,  $J = 7.5$  Hz, ArCH<sub>2</sub>, 2H), 2.29 (dt,  $J = 2 \times 7.5$  Hz, CH<sub>2</sub>CH<sub>vin</sub>, 2H), 1.97 (t,  $J = 7.4$  Hz, CH<sub>2</sub>(CH<sub>3</sub>)C=C, 2H), 1.56 (tt,  $J = 2 \times 7.5$  Hz, CH<sub>2</sub>CH<sub>2</sub>OH, 2H), 1.52 (s, CH<sub>3</sub>, 3H), 1.39 (tt,  $J = 2 \times 7.5$  Hz, CH<sub>2</sub>(CH<sub>2</sub>)<sub>3</sub>OH, 2H), 1.34-1.24 (m, CH<sub>2</sub>(CH<sub>2</sub>)<sub>2</sub>OH, 2H). <sup>13</sup>C NMR (125 MHz, CDCl<sub>3</sub>)  $\delta$  162.9 ( $J_{\text{C,F}} = 245$  Hz), 145.0 ( $J_{\text{C,F}} = 7.1$  Hz), 136.3, 129.6 ( $J_{\text{C,F}} = 8.3$  Hz), 124.2 ( $J_{\text{C,F}} = 2.6$  Hz), 123.2, 115.4 ( $J_{\text{C,F}} = 21$  Hz), 112.6 ( $J_{\text{C,F}} = 21$  Hz), 63.4, 39.6, 35.9, 32.7, 29.6, 27.7, 25.3, 15.9. HRMS (ESI<sup>+</sup>) exact mass calcd for C<sub>16</sub>H<sub>24</sub>OF [M+H]<sup>+</sup> requires  $m/z$  251.1806, found  $m/z$  251.1806.

4.5.3 (E)-9-(3-Fluorophenyl)-6-methylnon-6-en-1-al (**20**)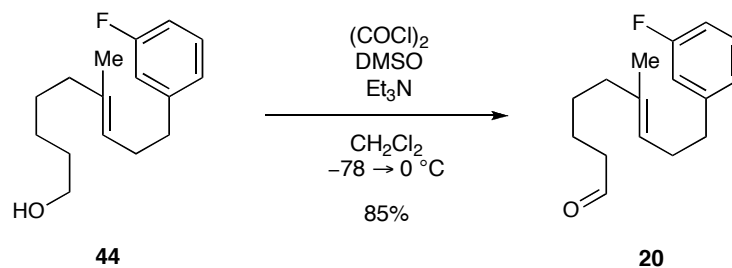

Oxalyl chloride (0.48 mL, 685 mg, 5.40 mmol, 1.10 equiv) was dissolved in  $\text{CH}_2\text{Cl}_2$  (50 mL) and cooled to  $-78 \text{ } ^\circ\text{C}$ . DMSO (0.84 mL, 922 mg, 11.8 mmol, 2.40 equiv) was added dropwise and the resultant solution stirred for 10 min. Subsequently, a solution of alcohol **44** (2.58 g, 10.0 mmol, 1.00 equiv) in  $\text{CH}_2\text{Cl}_2$  (10 mL) was added slowly and stirring was continued for 10 min at  $-78 \text{ } ^\circ\text{C}$ . Upon addition of  $\text{Et}_3\text{N}$  (3.30 mL, 2.38 g, 23.6 mmol, 4.80 equiv), the reaction mixture was allowed to warm to  $0 \text{ } ^\circ\text{C}$  within 1 h. After addition of water (50 mL) and aqueous 2M HCl (20 mL), the aqueous layer was extracted with EtOAc ( $3 \times 50 \text{ mL}$ ). The combined organic layers were washed with brine (30 mL), dried ( $\text{MgSO}_4$ ) and concentrated *in vacuo*. Purification of the crude material by flash chromatography (5% EtOAc/hexanes) furnished title compound **20** (1.03 g, 85% yield) as a colorless oil.

IR (ATR)  $\nu$  ( $\text{cm}^{-1}$ ) 2931, 2858, 2718, 1721, 1615, 1588, 1487, 1448, 1410, 1386, 1253, 1138, 1106, 1078, 1005, 964, 937, 889, 864, 781, 742, 717, 690.  $^1\text{H}$  NMR (500 MHz,  $\text{CDCl}_3$ )  $\delta$  9.76 (br s,  $\text{CHO}$ , 1H), 7.23 (ddd,  $J = 2 \times 7.2 \text{ Hz}$ ,  $J_{\text{H,F}} = 7.2 \text{ Hz}$ , ArH, 1H), 6.96 (d,  $J = 7.6 \text{ Hz}$ , ArH, 1H), 6.91-6.84 (m, ArH, 2H), 5.15 (t,  $J = 6.9 \text{ Hz}$ ,  $\text{CH}_{\text{vin}}$ , 1H), 2.64 (t,  $J = 7.5 \text{ Hz}$ ,  $\text{CH}_2\text{CHO}$ , 2H), 2.41 (t,  $J = 7.3 \text{ Hz}$ , Ar $\text{CH}_2$ , 2H), 2.30 (dt,  $J = 2 \times 7.4 \text{ Hz}$ ,  $\text{CH}_2\text{CH}_{\text{vin}}$ , 2H), 1.99 (t,  $J = 7.4 \text{ Hz}$ ,  $\text{CH}_2(\text{CH}_3)\text{C}=\text{C}$ , 2H), 1.57 (tt,  $J = 2 \times 7.4 \text{ Hz}$ ,  $\text{CH}_2\text{CH}_2\text{CHO}$ , 2H), 1.52 (s,  $\text{CH}_3$ , 3H), 1.41 (tt,  $J = 2 \times 7.2 \text{ Hz}$ ,  $\text{CH}_2(\text{CH}_2)_2\text{CHO}$ , 2H).  $^{13}\text{C}$  NMR (125 MHz,  $\text{CDCl}_3$ )  $\delta$  202.9, 162.9 ( $J_{\text{C,F}} = 246 \text{ Hz}$ ), 145.0 ( $J_{\text{C,F}} = 7.1 \text{ Hz}$ ), 135.7, 129.7 ( $J_{\text{C,F}} = 8.4 \text{ Hz}$ ), 124.2 ( $J_{\text{C,F}} = 2.6 \text{ Hz}$ ), 123.7, 115.3 ( $J_{\text{C,F}} = 21 \text{ Hz}$ ), 112.6 ( $J_{\text{C,F}} = 21 \text{ Hz}$ ), 43.8, 39.3, 35.8 ( $J_{\text{C,F}} = 1.5 \text{ Hz}$ ), 29.6, 27.3, 21.6, 15.8. HRMS (ESI $^+$ ) exact mass calcd for  $\text{C}_{16}\text{H}_{22}\text{OF}$   $[\text{M}+\text{H}]^+$  requires  $m/z$  249.1649 found  $m/z$  249.1646.

## 4.6 Preparation of Aldehyde 21

### 4.6.1 Methyl 4-(2-iodoethyl)benzoate (**33**)

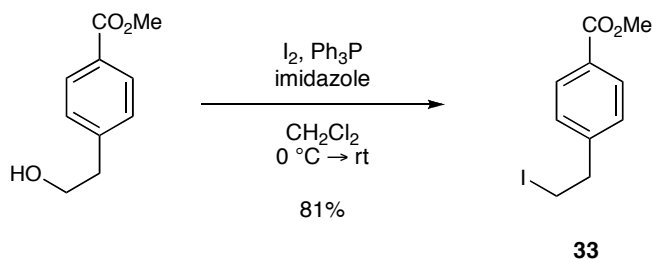

Iodine (6.14 g, 24.2 mmol, 1.50 equiv) was added to a solution of  $\text{Ph}_3\text{P}$  (6.35 g, 24.2 mmol, 1.50 equiv) in  $\text{CH}_2\text{Cl}_2$  (100 mL) at  $0\text{ }^\circ\text{C}$  and stirred for 10 min. Upon addition of imidazole (2.74 g, 40.3 mmol, 2.50 equiv) and further 10 min of stirring, a solution of methyl 4-(2-hydroxyethyl)benzoate<sup>13</sup> (2.90 g, 16.1 mmol, 1.00 equiv) in  $\text{CH}_2\text{Cl}_2$  (10 mL) was added via syringe followed by stirring for 1 h at room temperature. The reaction mixture was washed with aqueous  $\text{Na}_2\text{SO}_3$  (2  $\times$  40 mL) and the aqueous layer extracted with  $\text{CH}_2\text{Cl}_2$  (2  $\times$  50 mL). The combined organic layers were dried ( $\text{MgSO}_4$ ) and concentrated *in vacuo*. The residual was treated with  $\text{PE}/\text{Et}_2\text{O}$  (1:1, 300 mL) to precipitate  $\text{Ph}_3\text{PO}$ . Filtration, concentration *in vacuo*, and purification by flash chromatography (5%  $\text{EtOAc}/\text{hexanes}$ ) furnished iodide **33** (3.79 g, 81% yield) as a yellowish solid.

IR (ATR)  $\nu$  ( $\text{cm}^{-1}$ ) 3067, 3032, 2956, 1718, 1677, 1606, 1572, 1505, 1445, 1431, 1411, 1365, 1304, 1273, 1188, 1174, 1162, 1107, 1013, 961, 861, 833, 812, 762, 733, 703, 647, 635.  $^1\text{H}$  NMR (500 MHz,  $\text{CDCl}_3$ )  $\delta$  8.01 (d,  $J = 7.4$  Hz, ArH, 2H), 7.28 (d,  $J = 7.4$  Hz, ArH, 2H), 3.92 (s,  $\text{CO}_2\text{CH}_3$ , 3H), 3.37 (t,  $J = 7.6$  Hz,  $\text{CH}_2$ , 2H), 3.24 (t,  $J = 7.6$  Hz,  $\text{CH}_2$ , 2H).  $^{13}\text{C}$  NMR (125 MHz,  $\text{CDCl}_3$ )  $\delta$  167.0, 145.7, 130.1, 128.5, 128.1, 52.2, 40.1, 4.7. HRMS (ESI<sup>+</sup>) exact mass calcd for  $\text{C}_{10}\text{H}_{12}\text{IO}_2$  [ $\text{M}+\text{H}$ ]<sup>+</sup> requires  $m/z$  290.9877, found  $m/z$  290.9874.

(13) Tietze, L. F.; Goerlach, A.; Beller, M. *Liebigs Ann. Chem.* **1988**, 559.

4.6.2 (*E*)-Methyl 4-(9-(*tert*-butyldimethylsilyloxy)-4-methylnon-3-enyl)benzoate (**39**)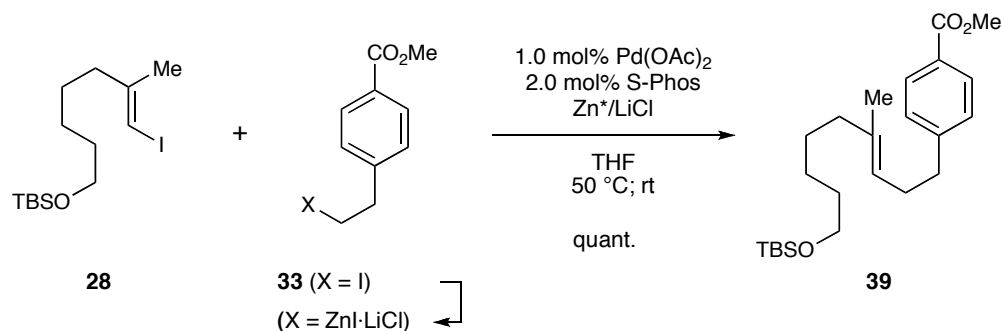

Anhydrous LiCl (530 mg, 12.5 mmol, 1.25 equiv) was placed in an argon-flushed 25-mL Schlenk flask and dried for 30 min at 150-180 °C under high vacuum (<1 torr) with slow stirring. Upon addition of zinc powder (325 mesh, 1.23 g, 18.8 mmol, 1.88 equiv) heating under high vacuum was continued for 30 min. After cooling to room temperature and backfilling with argon, the mixture was suspended with THF (10 mL). Subsequently, the zinc powder was activated by sequential addition of 1,2-dibromoethane (54  $\mu$ L, 118 mg, 0.63 mmol, 0.063 equiv), TMSCl (3 drops), and iodine (12 drops of a 1M solution in THF); each addition followed by gentle heating to reflux with a heat gun. A solution of iodide **33** (3.63 g, 12.5 mmol, 1.25 equiv) in THF (5.0 mL) was added portionwise at room temperature and stirring was continued for 4 h at 50 °C. The solution of homobenzylic zinc iodide and was allowed to cool to room temperature and separated via syringe from remaining zinc powder.

In a separate 50-mL Schlenk flask Pd(OAc)<sub>2</sub> (22.5 mg, 0.100 mmol, 0.0100 equiv) and S-Phos (82.1 mg, 0.200 mmol, 0.0200 equiv) was dissolved in THF (5.0 mL) and a solution of vinyl iodide **28** (3.68 g, 10.0 mmol, 1.00 equiv) in THF (3.0 mL) was added. The previously prepared solution of homobenzylic zinc reagent was quickly added via syringe leading to an exothermic reaction. Further stirring at room temperature for 3 h was followed by aqueous work-up with sat. NH<sub>4</sub>Cl (50 mL) and extraction with EtOAc (4  $\times$  30 mL). The combined organic layers were washed with brine (30 mL), dried (MgSO<sub>4</sub>), and concentrated under reduced pressure. Purification by flash chromatography (5% EtOAc/hexanes) furnished title compound **39** (4.09 g, quant. yield, 90% purity) as a yellowish oil.

IR (ATR)  $\nu$  (cm<sup>-1</sup>) 2929, 2856, 1723, 1610, 1574, 1462, 1434, 1386, 1360, 1309, 1275, 1254, 1191, 1178, 1099, 1020, 1006, 971, 938, 912, 832, 813, 773, 703, 661. <sup>1</sup>H NMR (500 MHz, CDCl<sub>3</sub>)  $\delta$  7.95 (d,  $J$  = 7.3 Hz, ArH, 2H), 7.26 (d,  $J$  = 8.0 Hz, ArH, 2H), 5.14 (t,  $J$  = 6.8 Hz, CH<sub>vin</sub>, 1H), 3.91 (s, CO<sub>2</sub>CH<sub>3</sub>, 3H), 3.60 (t,  $J$  = 6.3 Hz, CH<sub>2</sub>OSi, 2H), 2.68 (t,  $J$  = 7.6 Hz, ArCH<sub>2</sub>, 2H), 2.31 (dt,  $J$  = 2  $\times$  7.4 Hz, CH<sub>2</sub>CH<sub>vin</sub>, 2H), 1.95 (t,  $J$  = 7.4 Hz, CH<sub>2</sub>(CH<sub>3</sub>)C=C, 2H), 1.55-1.46 (m, 2H, CH<sub>2</sub>CH<sub>2</sub>OSi, 2H), 1.51 (s, CH<sub>3</sub>, 3H), 1.37 (tt,  $J$  = 2  $\times$  7.2 Hz, CH<sub>2</sub>(CH<sub>2</sub>)<sub>3</sub>OSi, 2H), 1.30-1.22 (m, CH<sub>2</sub>(CH<sub>2</sub>)<sub>2</sub>OSi, 2H), 0.89 (s, SiC(CH<sub>3</sub>)<sub>3</sub>, 9H), 0.05 (s, Si(CH<sub>3</sub>)<sub>2</sub>, 6H). <sup>13</sup>C NMR (125 MHz, CDCl<sub>3</sub>)  $\delta$  167.3, 148.0, 136.6, 129.6, 128.6, 127.7, 122.9, 63.4, 52.1, 39.7, 36.2, 32.8, 29.6, 27.8, 26.1, 25.5, 18.5, 15.9, -5.2. HRMS (ESI<sup>+</sup>) exact mass calcd for C<sub>24</sub>H<sub>41</sub>O<sub>3</sub>Si [M+H]<sup>+</sup> requires  $m/z$  405.2820, found  $m/z$  405.2819.

#### 4.6.3 (*E*)-Methyl 4-(9-hydroxy-4-methylnon-3-enyl)benzoate (**45**)

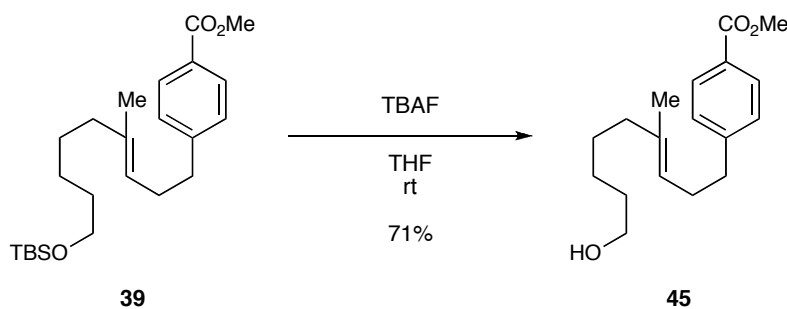

TBAF (11.0 mL of a 1.0M solution in THF, 11.0 mmol, 1.10 equiv) was added slowly to a solution of silyl ether **39** (4.09 g, 10.0 mmol, 1.00 equiv) in THF (90 mL) at room temperature. After stirring had been continued for 6 h, water (60 mL) and sat. NH<sub>4</sub>Cl (40 mL) were added and the aqueous layer was extracted with EtOAc (3  $\times$  50 mL). The combined organic layers were washed with brine (40 mL), dried (MgSO<sub>4</sub>) and concentrated *in vacuo*. Purification of the crude material by flash chromatography (20% EtOAc/hexanes) furnished title compound **45** (2.06 g, 71% yield over two steps) as a colorless oil.

IR (ATR)  $\nu$  (cm<sup>-1</sup>) 3410, 2930, 2857, 1720, 1610, 1574, 1510, 1435, 1414, 1382, 1309, 1275, 1178, 1108, 1048, 1019, 966, 853, 832, 763, 704. <sup>1</sup>H NMR (500 MHz, CDCl<sub>3</sub>)  $\delta$  7.93 (d,  $J$  = 8.3 Hz, ArH, 2H), 7.23 (d,  $J$  = 8.3 Hz, ArH, 2H), 5.12 (t,  $J$  = 7.1 Hz, CH<sub>vin</sub>, 1H), 3.89 (s, CO<sub>2</sub>CH<sub>3</sub>, 3H), 3.61 (t,  $J$  = 6.7 Hz, CH<sub>2</sub>OH, 2H), 2.68 (t,  $J$  = 7.5 Hz, ArCH<sub>2</sub>, 2H), 2.30 (dt,  $J$  = 2  $\times$  7.4 Hz,

$\text{CH}_2\text{CH}_{\text{vin}}$ , 2H), 1.95 (t,  $J = 7.3$  Hz,  $\text{CH}_2(\text{CH}_3)\text{C}=\text{C}$ , 2H), 1.58-1.51 (m, 2H,  $\text{CH}_2\text{CH}_2\text{OH}$ , 2H), 1.49 (s,  $\text{CH}_3$ , 3H), 1.37 (tt,  $J = 2 \times 7.2$  Hz,  $\text{CH}_2(\text{CH}_2)_3\text{OH}$ , 2H), 1.32-1.23 (m,  $\text{CH}_2(\text{CH}_2)_2\text{OH}$ , 2H).  $^{13}\text{C}$  NMR (125 MHz,  $\text{CDCl}_3$ )  $\delta$  167.3, 148.0, 136.6, 129.6, 128.6, 127.6, 123.0, 63.0, 52.0, 39.6, 36.1, 32.7, 29.5, 27.7, 25.3, 15.9. HRMS (ESI<sup>+</sup>) exact mass calcd for  $\text{C}_{18}\text{H}_{26}\text{O}_3\text{Na}$  [ $\text{M}+\text{Na}$ ]<sup>+</sup> requires  $m/z$  313.1774, found  $m/z$  313.1772.

#### 4.6.4 (*E*)-Methyl 4-(4-methyl-9-oxonon-3-enyl)benzoate (**21**)

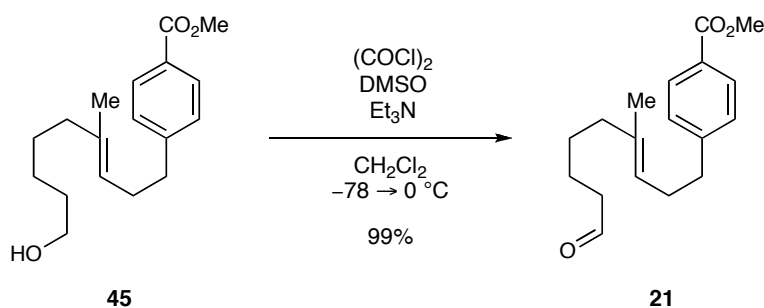

Oxalyl chloride (0.62 mL, 899 mg, 7.08 mmol, 1.10 equiv) was dissolved in  $\text{CH}_2\text{Cl}_2$  (65 mL) and cooled to  $-78^\circ\text{C}$ . DMSO (1.10 mL, 1.21 g, 15.5 mmol, 2.40 equiv) was added dropwise and the resultant solution stirred for 10 min. Subsequently, a solution of alcohol **45** (1.87 g, 6.44 mmol, 1.00 equiv) in  $\text{CH}_2\text{Cl}_2$  (10 mL) was added slowly and stirring was continued for 10 min at  $-78^\circ\text{C}$ . Upon addition of  $\text{Et}_3\text{N}$  (4.30 mL, 3.13 g, 30.9 mmol, 4.80 equiv), the reaction mixture was allowed to warm to  $0^\circ\text{C}$  within 1 h. After addition of water (70 mL) and aqueous 2M HCl (30 mL), the aqueous layer was extracted with EtOAc (3  $\times$  60 mL). The combined organic layers were washed with brine (40 mL), dried ( $\text{MgSO}_4$ ) and concentrated *in vacuo*. Purification of the crude material by flash chromatography (5% EtOAc/hexanes) furnished the title compound **20** (1.47 g, 99% yield) as a colorless oil.

IR (ATR)  $\nu$  ( $\text{cm}^{-1}$ ) 2933, 2858, 2717, 1717, 1609, 1574, 1510, 1434, 1413, 1387, 1309, 1274, 1178, 1107, 1020, 966, 853, 831, 762, 704.  $^1\text{H}$  NMR (500 MHz,  $\text{CDCl}_3$ )  $\delta$  9.75 (br s, CHO), 7.94 (d,  $J = 7.5$  Hz, ArH, 2H), 7.25 (d,  $J = 7.6$  Hz, ArH, 2H), 5.14 (t,  $J = 7.0$  Hz,  $\text{CH}_{\text{vin}}$ , 1H), 3.90 (s,  $\text{CO}_2\text{CH}_3$ , 3H), 2.69 (t,  $J = 7.5$  Hz, Ar $\text{CH}_2$ , 2H), 2.41 (t,  $J = 7.3$  Hz,  $\text{CH}_2\text{CHO}$ , 2H), 2.31 (dt,  $J = 2 \times 7.4$  Hz,  $\text{CH}_2\text{CH}_{\text{vin}}$ , 2H), 1.97 (t,  $J = 7.4$  Hz,  $\text{CH}_2(\text{CH}_3)\text{C}=\text{C}$ , 2H), 1.55 (tt,  $J = 2 \times 7.5$

Hz,  $\text{CH}_2\text{CH}_2\text{CHO}$ , 2H), 1.50 (s,  $\text{CH}_3$ , 3H), 1.39 (tt,  $J = 2 \times 7.6$  Hz,  $\text{CH}_2(\text{CH}_2)_2\text{CHO}$ , 2H).  $^{13}\text{C}$  NMR (125 MHz,  $\text{CDCl}_3$ )  $\delta$  203.0, 167.3, 147.9, 135.8, 129.6, 128.6, 127.7, 123.5, 52.1, 43.8, 39.3, 36.1, 29.5, 27.3, 21.6, 15.8. HRMS (ESI<sup>+</sup>) exact mass calcd for  $\text{C}_{18}\text{H}_{24}\text{O}_3\text{Na}$   $[\text{M}+\text{Na}]^+$  requires  $m/z$  311.1618, found  $m/z$  311.1617.

## 4.7 Preparation of Aldehyde 22

### 4.7.1 (*E*)-*tert*-Butyl(9-(3-methoxyphenyl)-6-methylnon-6-enyloxy)dimethylsilane (**40**)

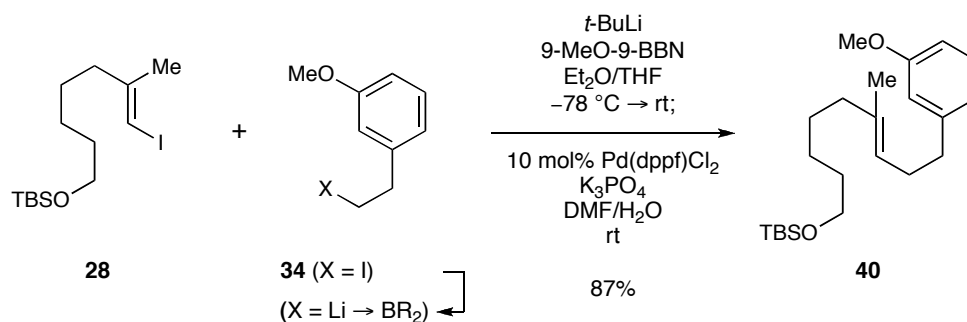

*t*-BuLi (41.2 mL of a 1.6M solution in pentane, 66.0 mmol, 4.40 equiv) was rapidly added to a solution of alkyl iodide **34**<sup>14</sup> (7.86 g, 30.0 mmol, 2.00 equiv) in  $\text{Et}_2\text{O}$  (115 mL) at  $-78\text{ }^\circ\text{C}$ . After stirring for 3 min, 9-methoxy-9-borabicyclononane (69.0 mL of a 1.0M solution in hexanes, 69.0 mmol, 4.60 equiv) was added in one portion followed by THF (75 mL). The solution was stirred for 10 min at  $-78\text{ }^\circ\text{C}$  and then allowed to warm to room temperature for 1.5 h. To this mixture, aqueous 3M  $\text{K}_3\text{PO}_4$  (25.0 mL, 75.0 mmol, 5.0 equiv), vinyl iodide **28** (5.52 g, 15.0 mmol, 1.00 equiv) in DMF (100 mL), and  $\text{Pd(dppf)Cl}_2 \cdot \text{CH}_2\text{Cl}_2$  (1.22 g, 1.50 mmol, 0.100 equiv) were added sequentially, and the resultant dark solution was stirred for 5 h. Upon addition of water (200 mL), the reaction mixture was extracted with  $\text{Et}_2\text{O}$  ( $3 \times 150$  mL). The combined organic layers were washed with water ( $2 \times 60$  mL) and brine (60 mL), dried over  $\text{MgSO}_4$ , and concentrated *in vacuo*. Purification of the crude mixture by flash chromatography (2%  $\text{EtOAc}$ /hexanes) furnished the title compound **40** (4.91 g, 87% yield, approx. 90% purity). Remaining impurities were separated after the following deprotection step.

(14) Lanni, T. B., Jr; Greene, K. L.; Kolz, C. N.; Para, K. S.; Visnick, M.; Mobley, J. L.; Dudley, D. T.; Baginski, T. J.; Liimatta, M. B. *Bioorg. Med. Chem. Lett.* **2007**, *17*, 756.

$^1\text{H}$  NMR (500 MHz,  $\text{CDCl}_3$ )  $\delta$  7.20 (dd,  $J = 2 \times 7.0$  Hz, ArH, 1H), 6.80 (d,  $J = 7.2$  Hz, ArH, 1H), 6.77-6.69 (m, ArH, 2H), 5.18 (t,  $J = 6.4$  Hz,  $\text{CH}_{\text{vin}}$ , 1H), 3.80 (s,  $\text{OCH}_3$ , 3H), 3.60 (t,  $J = 6.6$  Hz,  $\text{CH}_2\text{OSi}$ , 2H), 2.61 (t,  $J = 6.6$  Hz,  $\text{ArCH}_2$ , 2H), 2.30 (dt,  $J = 2 \times 7.3$  Hz,  $\text{CH}_2\text{CH}_{\text{vin}}$ , 2H), 1.97 (t,  $J = 7.1$  Hz,  $\text{CH}_2(\text{CH}_3)\text{C}=\text{C}$ , 2H), 1.55 (s,  $\text{CH}_3$ , 3H), 1.55-1.48 (m, 2H,  $\text{CH}_2\text{CH}_2\text{OSi}$ , 2H), 1.42-1.34 (m,  $\text{CH}_2(\text{CH}_2)_3\text{OSi}$ , 2H), 1.31-1.22 (m,  $\text{CH}_2(\text{CH}_2)_2\text{OSi}$ , 2H), 0.90 (s,  $\text{SiC}(\text{CH}_3)_3$ , 9H), 0.05 (s,  $\text{Si}(\text{CH}_3)_2$ , 6H).  $^{13}\text{C}$  NMR (125 MHz,  $\text{CDCl}_3$ )  $\delta$  159.6, 144.2, 136.1, 129.2, 123.5, 121.0, 114.3, 111.0, 63.4, 55.2, 39.7, 36.3, 32.9, 29.9, 27.8, 26.1, 25.5, 18.5, 16.0, -5.2.

#### 4.7.2 (*E*)-9-(3-Methoxyphenyl)-6-methylnon-6-en-1-ol (**46**)

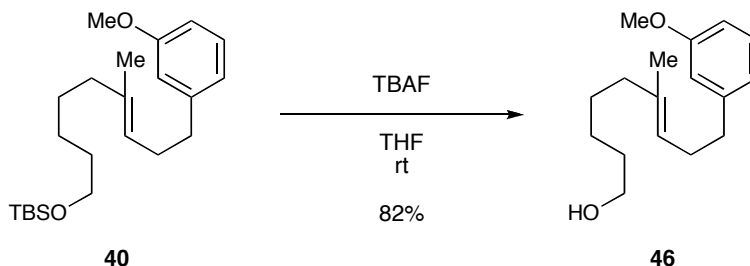

TBAF (15.7 mL of a 1.0M solution in THF, 15.7 mmol, 1.20 equiv) was added slowly to a solution of silyl ether **40** (4.91 g, 13.1 mmol, 1.00 equiv) in THF (120 mL) at room temperature. After stirring had been continued for 6 h, water (100 mL) and sat.  $\text{NH}_4\text{Cl}$  (60 mL) were added and the aqueous layer was extracted with EtOAc ( $3 \times 80$  mL). The combined organic layers were washed with brine (50 mL), dried ( $\text{MgSO}_4$ ) and concentrated *in vacuo*. Purification of the crude material by flash chromatography (20% EtOAc/hexanes) furnished title compound **46** (2.82 g, 82% yield) as a colorless oil.

IR (ATR)  $\nu$  ( $\text{cm}^{-1}$ ) 3336, 2929, 2856, 1601, 1584, 1487, 1453, 1436, 1413, 1370, 1325, 1291, 1259, 1163, 1151, 1108, 1045, 872, 848, 775, 735, 676, 643.  $^1\text{H}$  NMR (500 MHz,  $\text{CDCl}_3$ )  $\delta$  7.20 (dd,  $J = 2 \times 7.7$  Hz, ArH, 1H), 6.80 (d,  $J = 7.8$  Hz, ArH, 1H), 6.77-6.70 (m, ArH, 2H), 5.17 (t,  $J = 7.1$  Hz,  $\text{CH}_{\text{vin}}$ , 1H), 3.80 (s,  $\text{OCH}_3$ , 3H), 3.64 (t,  $J = 6.5$  Hz,  $\text{CH}_2\text{OH}$ , 2H), 2.62 (t,  $J = 7.4$  Hz,  $\text{ArCH}_2$ , 2H), 2.30 (dt,  $J = 2 \times 7.5$  Hz,  $\text{CH}_2\text{CH}_{\text{vin}}$ , 2H), 1.98 (t,  $J = 7.4$  Hz,  $\text{CH}_2(\text{CH}_3)\text{C}=\text{C}$ , 2H), 1.60-1.52 (m, 2H,  $\text{CH}_2\text{CH}_2\text{OH}$ , 2H), 1.55 (s,  $\text{CH}_3$ , 3H), 1.40 (tt,  $J = 2 \times 7.4$  Hz,  $\text{CH}_2(\text{CH}_2)_3\text{OH}$ , 2H), 1.34-1.26 (m,  $\text{CH}_2(\text{CH}_2)_2\text{OH}$ , 2H).  $^{13}\text{C}$  NMR (125 MHz,  $\text{CDCl}_3$ )  $\delta$  159.6, 144.1, 135.9,



129.2, 123.7, 121.0, 114.4, 110.9, 63.1, 55.2, 39.6, 36.2, 32.8, 29.8, 27.7, 25.4, 15.9. HRMS (ESI<sup>+</sup>) exact mass calcd for C<sub>17</sub>H<sub>27</sub>O<sub>2</sub> [M+H]<sup>+</sup> requires *m/z* 263.2006, found *m/z* 263.2003.

#### 4.7.3 (*E*)-9-(3-Methoxyphenyl)-6-methylnon-6-enal (**22**)

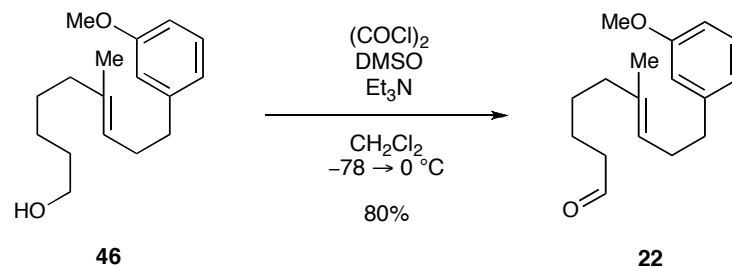

Oxalyl chloride (0.34 mL, 490 mg, 3.86 mmol, 1.10 equiv) was dissolved in CH<sub>2</sub>Cl<sub>2</sub> (30 mL) and cooled to -78 °C. DMSO (0.60 mL, 658 mg, 8.42 mmol, 2.40 equiv) was added dropwise and the resultant solution stirred for 10 min. Subsequently, a solution of alcohol **46** (920 mg, 3.51 mmol, 1.00 equiv) in CH<sub>2</sub>Cl<sub>2</sub> (10 mL) was added slowly and stirring was continued for 10 min at -78 °C. Upon addition of Et<sub>3</sub>N (2.34 mL, 1.70 g, 16.8 mmol, 4.80 equiv) the reaction mixture was allowed to warm to 0 °C within 1 h. After addition of water (50 mL) and aqueous 2M HCl (20 mL), the aqueous layer was extracted with EtOAc (3 × 40 mL). The combined organic layers were washed with brine (30 mL), dried (MgSO<sub>4</sub>) and concentrated *in vacuo*. Purification of the crude material by flash chromatography (5% EtOAc/hexanes) furnished title compound **22** (731 mg, 80% yield) as a colorless oil.

IR (ATR)  $\nu$  (cm<sup>-1</sup>) 2933, 2857, 2835, 2718, 1722, 1601, 1583, 1487, 1453, 1437, 1386, 1313, 1259, 1164, 1151, 1106, 1082, 1043, 995, 960, 872, 850, 777, 736, 716, 644. <sup>1</sup>H NMR (500 MHz, CDCl<sub>3</sub>)  $\delta$  9.75, (br s, CHO, 1H), 7.20 (dd, *J* = 2 × 7.7 Hz, ArH, 1H), 6.59 (d, *J* = 7.5 Hz, ArH, 1H), 6.75 (s, ArH, 1H), 6.74 (d, *J* = 7.8 Hz, ArH, 1H), 5.18 (t, *J* = 6.7 Hz, CH<sub>vin</sub>, 1H), 3.80 (s, OCH<sub>3</sub>, 3H), 2.61 (t, *J* = 8.1 Hz, ArCH<sub>2</sub>, 2H), 2.42 (t, *J* = 7.3 Hz, CH<sub>2</sub>CHO, 2H), 2.30 (dt, *J* = 2 × 7.6 Hz, CH<sub>2</sub>CH<sub>vin</sub>, 2H), 1.99 (t, *J* = 7.4 Hz, CH<sub>2</sub>(CH<sub>3</sub>)C=C, 2H), 1.57 (tt, *J* = 2 × 7.4 Hz, CH<sub>2</sub>CH<sub>2</sub>CHO, 2H), 1.54 (s, CH<sub>3</sub>, 3H), 1.41 (tt, *J* = 2 × 7.8 Hz, CH<sub>2</sub>(CH<sub>2</sub>)<sub>2</sub>CHO, 2H). <sup>13</sup>C NMR (125 MHz, CDCl<sub>3</sub>)  $\delta$  203.1, 159.5, 144.0, 135.3, 129.2, 124.1, 121.0, 114.3, 110.9, 55.2, 43.8,

39.3, 36.2, 29.8, 27.3, 21.6, 15.8. HRMS (ESI<sup>+</sup>) exact mass calcd for C<sub>17</sub>H<sub>25</sub>O<sub>2</sub> [M+H]<sup>+</sup> requires *m/z* 261.1849, found *m/z* 261.1847.

#### 4.8 General Strategy toward Tricyclization Precursors

All tricyclization substrates were available following the synthetic sequence outlined in Scheme S2. The synthesis included sp<sup>2</sup>-sp<sup>3</sup> cross-coupling<sup>5</sup> of vinyl iodide **28**<sup>4</sup> and the organozinc reagent derived from alkyl iodide **47** followed by phosphorylation of nitrile **48** to give cyanophosphonate **49**.<sup>15</sup> A Horner-Wadsworth-Emmons coupling<sup>16</sup> furnished intermediates **53-55** in good diastereoselectivities (typically 6:1 *Z/E*). Finally, deprotection and oxidation delivered the desired aldehydes **23-25**.

**Scheme S2.** Synthetic Access to Tricyclization Substrates.

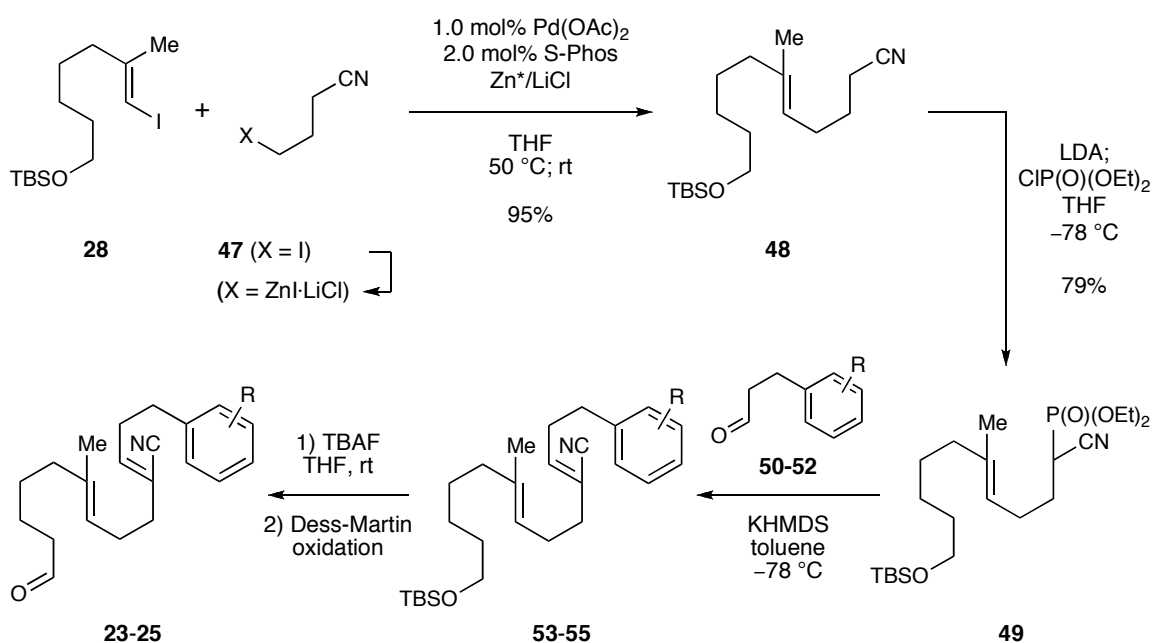

(15) Procedure adapted from: Iorga, B.; Ricard, L.; Savignac, P. *J. Chem. Soc., Perkin Trans. 1* **2000**, 3311.

(16) Procedure adapted from: Zoretic, P. A.; Zhang, Y.; Fang, H.; Ribeiro, A. A.; Dubay, G. *J. Org. Chem.* **1998**, 63, 1162.

## 4.9 Synthesis of Phosphonate **49**

### 4.9.1 (*E*)-11-(*tert*-Butyldimethylsilyloxy)-6-methylundec-5-enenitrile (**48**)

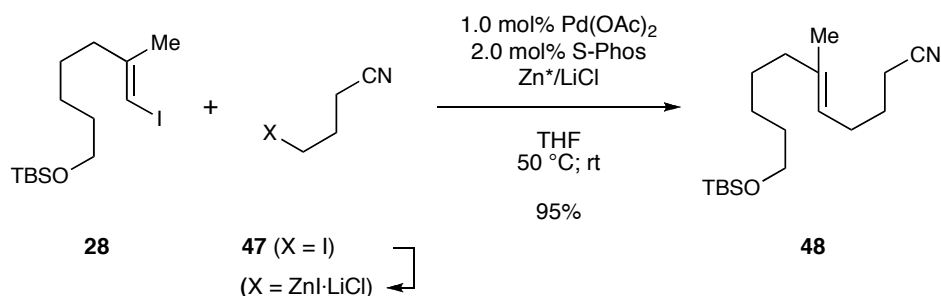

Anhydrous LiCl (636 mg, 15.0 mmol, 1.25 equiv) was placed in an argon-flushed 25-mL Schlenk flask and dried for 30 min at 150-180 °C under high vacuum (<1 torr) with slow stirring. Upon addition of zinc powder (325 mesh, 1.47 g, 22.5 mmol, 1.88 equiv) heating under high vacuum was continued for another 30 min. After cooling to room temperature and backfilling with argon, the mixture was suspended with THF (10 mL). Subsequently, the zinc powder was activated by sequential addition of 1,2-dibromoethane (64  $\mu$ L, 141 mg, 0.75 mmol, 0.05 equiv), TMSCl (3 drops), and iodine (15 drops of a 1M solution in THF); each addition followed by gentle heating to reflux with a heat gun. Portionwise addition of alkyl iodide **47** (3.86 g, 15.0 mmol, 1.25 equiv) at room temperature and subsequent stirring at for 4 h at 50 °C furnished a solution of alkyl zinc iodide that was allowed to cool to room temperature and separated via syringe from remaining zinc powder.

In a separate 50-mL Schlenk flask Pd(OAc)<sub>2</sub> (26.9 mg, 0.120 mmol, 0.0100 equiv) and S-Phos (98.5 mg, 0.240 mmol, 0.0200 equiv) was dissolved in THF (10 mL) and a solution of vinyl iodide **28** (4.42 g, 12.0 mmol, 1.00 equiv) in THF (4.0 mL) was added. The previously prepared solution of alkyl zinc reagent was quickly added via syringe leading to an exothermic reaction. Further stirring at room temperature for 3 h was followed by aqueous work-up with sat. NH<sub>4</sub>Cl (50 mL) and extraction with EtOAc (4  $\times$  30 mL). The combined organic layers were washed with brine (30 mL), dried (MgSO<sub>4</sub>), and concentrated under reduced pressure. Purification by flash chromatography (3% EtOAc/hexanes) furnished title compound **48** (3.53 g, 95% yield) as a colorless oil.

IR (ATR)  $\nu$  (cm<sup>-1</sup>) 2929, 2856, 2248, 1668, 1471, 1462, 1386, 1360, 1253, 1097, 1006, 978, 938, 911, 829, 813, 773, 712, 679, 661. <sup>1</sup>H NMR (500 MHz, CDCl<sub>3</sub>)  $\delta$  5.05 (t,  $J = 7.0$  Hz, CH<sub>vin</sub>, 1H), 3.60 (t,  $J = 6.6$  Hz, CH<sub>2</sub>OSi, 2H), 2.31 (t,  $J = 7.2$  Hz, CH<sub>2</sub>CN, 2H), 2.15 (dt,  $J = 2 \times 7.2$  Hz, CH<sub>2</sub>CH<sub>vin</sub>, 2H), 1.98 (t,  $J = 7.4$  Hz, CH<sub>2</sub>(CH<sub>3</sub>)C=C, 2H), 1.70 (tt,  $J = 2 \times 7.2$  Hz, CH<sub>2</sub>CH<sub>2</sub>CN, 2H), 1.61 (s, CH<sub>3</sub>, 3H), 1.52 (tt,  $J = 7.5$  Hz, CH<sub>2</sub>CH<sub>2</sub>OSi, 2H), 1.40 (tt,  $J = 7.5$  Hz, CH<sub>2</sub>(CH<sub>2</sub>)<sub>3</sub>OSi, 2H), 1.28 (tt,  $J = 7.5$  Hz, CH<sub>2</sub>(CH<sub>2</sub>)<sub>2</sub>OSi, 2H), 0.89 (s, Si(CH<sub>3</sub>)<sub>3</sub>, 9H), 0.04 (s, Si(CH<sub>3</sub>)<sub>2</sub>, 6H). <sup>13</sup>C NMR (125 MHz, CDCl<sub>3</sub>)  $\delta$  138.0, 121.6, 120.0, 63.3, 39.8, 32.8, 27.8, 26.7, 26.1, 25.62, 25.56, 18.5, 16.5, 16.1, -5.2. HRMS (ESI<sup>+</sup>) exact mass calcd for C<sub>18</sub>H<sub>36</sub>NOSi [M+H]<sup>+</sup> requires  $m/z$  310.2561, found  $m/z$  310.2562.

#### 4.9.2 (*E*)-Diethyl 10-(*tert*-butyldimethylsilyloxy)-1-cyano-5-methyldec-4-enylphosphonate (**49**)

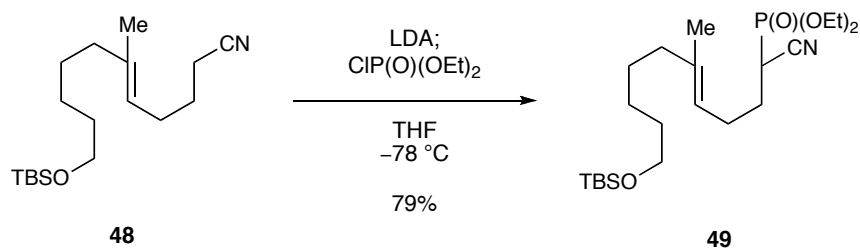

To a solution of *i*-Pr<sub>2</sub>NH (2.82 mL, 2.13 g, 21.0 mmol, 2.15 equiv) in THF (32 mL) was added *n*-BuLi (8.6 mL of a 2.4M solution in hexanes, 20.6 mmol, 2.10 equiv) at -78 °C. After stirring at 0 °C for 30 min, the reaction mixture was cooled again to -78 °C and a solution of nitrile **48** (3.03 g, 9.79 mmol, 1.00 equiv) in THF (8 mL) was added and stirred for further 30 min at this temperature. Subsequently, diethyl chlorophosphate (1.48 mL, 1.77 g, 10.3 mmol, 1.05 equiv) was added dropwise to give a bright yellow solution. After 2 h stirring at -78 °C the reaction mixture was poured onto sat. NH<sub>4</sub>Cl (40 mL) and water (40 mL) and the aqueous layer was extracted with EtOAc (4 × 30 mL). Washing of the combined organic phases with brine (50 mL), drying over MgSO<sub>4</sub> and evaporation under reduced pressure furnished the crude phosphonate that was purified by flash chromatography (30% EtOAc/hexanes) to give the title compound **49** (3.45 g, 79% yield) as a colorless oil.

IR (ATR)  $\nu$  (cm<sup>-1</sup>) 2930, 2857, 2242, 1472, 1462, 1444, 1389, 1369, 1361, 1255, 1163, 1097, 1048, 1016, 971, 903, 833, 813, 774, 754, 712, 680, 663. <sup>1</sup>H NMR (500 MHz, CDCl<sub>3</sub>)  $\delta$  5.04 (t,  $J = 6.9$  Hz, CH<sub>vin</sub>, 1H), 4.29-4.17 (m, P(OCH<sub>2</sub>CH<sub>3</sub>)<sub>2</sub>, 4H), 3.59 (t,  $J = 6.6$  Hz, CH<sub>2</sub>OSi, 2H), 2.92 (ddd,  $J_{C,P} = 23.2$  Hz,  $J = 8.8, 6.5$  Hz, PCHCN, 1H), 2.27 (m, CH<sub>2</sub>CH<sub>vin</sub>, 2H), 1.98 (t,  $J = 7.4$  Hz, CH<sub>2</sub>(CH<sub>3</sub>)C=C, 2H), 1.92 (tt,  $J = 2 \times 7.6$  Hz, CH<sub>2</sub>CHCN, 2H), 1.63 (s, CH<sub>3</sub>, 3H), 1.51 (tt,  $J = 6.8$  Hz, CH<sub>2</sub>CH<sub>2</sub>OSi, 2H), 1.43-1.33 (m, P(OCH<sub>2</sub>CH<sub>3</sub>)<sub>2</sub>, CH<sub>2</sub>(CH<sub>2</sub>)<sub>3</sub>OSi, 8H), 1.32-1.23 (m, CH<sub>2</sub>(CH<sub>2</sub>)<sub>2</sub>OSi, 2H), 0.89 (s, SiC(CH<sub>3</sub>)<sub>3</sub>, 9H), 0.04 (s, Si(CH<sub>3</sub>)<sub>2</sub>, 6H). <sup>13</sup>C NMR (125 MHz, CDCl<sub>3</sub>)  $\delta$  139.0, 120.8, 116.5 (d,  $J_{C,P} = 9.3$  Hz), 64.1 (d,  $J_{C,P} = 7.0$  Hz), 63.8 (d,  $J_{C,P} = 6.8$  Hz), 63.3, 39.8, 32.8, 29.3 (d,  $J_{C,P} = 144$  Hz), 27.8, 27.1 (d,  $J_{C,P} = 4.0$  Hz), 26.0, 25.9 (d,  $J_{C,P} = 13$  Hz), 25.6, 18.5, 16.5 (d,  $J_{C,P} = 3.8$  Hz), 16.4 (d,  $J_{C,P} = 3.8$  Hz), 16.2, -5.2. <sup>31</sup>P NMR (202 MHz, CDCl<sub>3</sub>)  $\delta$  18.4. HRMS (ESI<sup>+</sup>) exact mass calcd for C<sub>22</sub>H<sub>45</sub>NO<sub>4</sub>PSi [M+H]<sup>+</sup> requires  $m/z$  446.2850, found  $m/z$  446.2863.

## 4.10 Synthesis of Aldehyde 23

### 4.10.1 Preparation of Diene 53

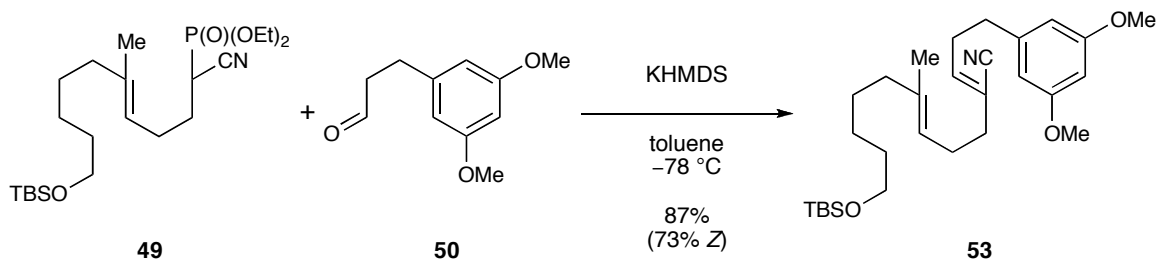

To a solution of phosphonate **49** (1.34 g, 3.00 mmol, 1.00 equiv) in toluene (40 mL) at -78 °C was added dropwise a solution of KHMDS (598 mg, 3.00 mmol, 1.00 equiv) in toluene (6.0 mL). After stirring had been continued for 1 h, a solution of aldehyde **50**<sup>17</sup> (583 mg, 3.00 mmol, 1.00 equiv) in toluene (6.0 mL) was added dropwise via syringe. The reaction mixture was stirred for 2 h at -78 °C, subsequently poured onto sat. NH<sub>4</sub>Cl (50 mL), and extracted with EtOAc (4 × 25 mL). The combined organic layers were washed with brine (30 mL), dried (MgSO<sub>4</sub>) and concentrated *in vacuo*. Purification by flash chromatography (4% EtOAc/hexanes) afforded title

(17) Nikas, S. P.; Thakur, G. A.; Makriyannis, A. *Synth. Commun.* **2002**, 32, 1751.

compound **53** (1.06 g, 73% , >20:1 *Z/E*) along with the separable diastereomer (210 mg, 14%, 1:3 *Z/E*) as viscous oils.

IR (ATR)  $\nu$  (cm<sup>-1</sup>) 2929, 2856, 2214, 1596, 1461, 1429, 1386, 1350, 1312, 1293, 1254, 1205, 1150, 1096, 1059, 1006, 938, 924, 831, 774, 692, 661. <sup>1</sup>H NMR (500 MHz, CDCl<sub>3</sub>)  $\delta$  6.37-6.29 (m, ArH, 3H), 6.12 (t, *J* = 7.1 Hz, NCC=CH<sub>vin</sub>, 1H), 5.01 (t, *J* = 7.0 Hz, CH<sub>vin</sub>, 1H), 3.79 (s, OCH<sub>3</sub>, 6H), 3.59 (t, *J* = 6.6 Hz, CH<sub>2</sub>OSi, 2H), 2.72-2.62 (m, 2 × CH<sub>2</sub>, 4H), 2.24-2.12 (m, 2 × CH<sub>2</sub>, 4H), 1.95 (t, *J* = 7.2 Hz, CH<sub>2</sub>, 2H), 1.58 (s, CH<sub>3</sub>, 3H), 1.51 (tt, *J* = 7.5 Hz, CH<sub>2</sub>CH<sub>2</sub>OSi, 2H), 1.41-1.33 (m, CH<sub>2</sub>(CH<sub>2</sub>)<sub>3</sub>OSi, 2H), 1.31-1.22 (m, CH<sub>2</sub>(CH<sub>2</sub>)<sub>2</sub>OSi, 2H), 0.89 (s, Si(CH<sub>3</sub>)<sub>3</sub>, 9H), 0.04 (s, Si(CH<sub>3</sub>)<sub>2</sub>, 6H). <sup>13</sup>C NMR (125 MHz, CDCl<sub>3</sub>)  $\delta$  160.9, 146.5, 142.7, 137.4, 121.7, 117.7, 115.1, 106.4, 98.2, 63.3, 55.4, 39.7, 35.1, 34.5, 32.83, 32.76, 27.8, 26.7, 26.1, 25.5, 18.5, 16.1, -5.2. HRMS (ESI<sup>+</sup>) exact mass calcd for C<sub>29</sub>H<sub>47</sub>NO<sub>3</sub>SiNa [M+Na]<sup>+</sup> requires *m/z* 508.3217, found *m/z* 508.3216.

#### 4.10.3 Preparation of Aldehyde **23**

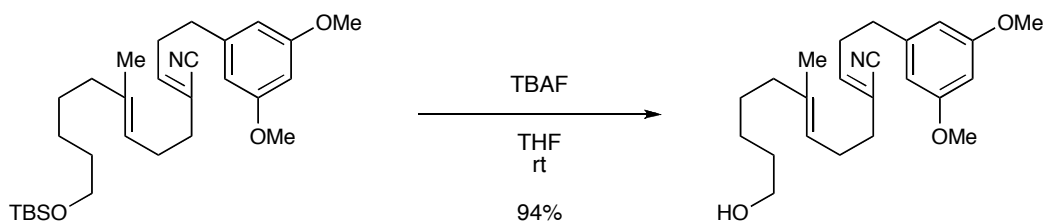

TBAF (2.10 mL of a 1.0M solution in THF, 2.10 mmol, 1.10 equiv) was added slowly to a solution of silyl ether **53** (930 mg, 1.91 mmol, 1.00 equiv) in THF (20 mL) at room temperature. After stirring had been continued for 2 h, water (20 mL) and sat. NH<sub>4</sub>Cl (20 mL) were added and the aqueous layer was extracted with EtOAc (3 × 20 mL). The combined organic layers were washed with brine (20 mL), dried (MgSO<sub>4</sub>) and concentrated *in vacuo*. Purification of the crude material by flash chromatography (30% EtOAc/hexanes) furnished the free alcohol (668 mg, 94% yield, 9:1 *Z/E*) as a colorless oil.

IR (ATR)  $\nu$  (cm<sup>-1</sup>) 3416, 2931, 2857, 2214, 1595, 1460, 1428, 1349, 1312, 1293, 1260, 1204, 1148, 1056, 938, 924, 830, 754, 693, 667. <sup>1</sup>H NMR (500 MHz, CDCl<sub>3</sub>)  $\delta$  6.39-6.28 (m, ArH,

3H), 6.12 (t,  $J = 7.1$  Hz,  $\text{NCC}=\text{CH}_{\text{vin}}$ , 1H), 5.01 (t,  $J = 7.0$  Hz,  $\text{CH}_{\text{vin}}$ , 1H), 3.79 (s,  $\text{OCH}_3$ , 6H), 3.63 (t,  $J = 8.6$  Hz,  $\text{CH}_2\text{OH}$ , 2H), 2.73-2.61 (m,  $2 \times \text{CH}_2$ , 4H), 2.23-2.15 (m,  $2 \times \text{CH}_2$ , 4H), 1.96 (t,  $J = 7.2$  Hz,  $\text{CH}_2$ , 2H), 1.59 (s,  $\text{CH}_3$ , 3H), 1.59-1.53 (m,  $\text{CH}_2\text{CH}_2\text{OH}$ , 2H), 1.42-1.35 (m,  $\text{CH}_2(\text{CH}_2)_3\text{OH}$ , 2H), 1.34-1.27 (m,  $\text{CH}_2(\text{CH}_2)_2\text{OH}$ , 2H).  $^{13}\text{C}$  NMR (125 MHz,  $\text{CDCl}_3$ )  $\delta$  160.9, 146.7, 142.7, 137.2, 121.8, 117.7, 115.1, 106.4, 98.2, 63.0, 55.4, 39.6, 35.1, 34.4, 32.72, 32.71, 27.7, 26.7, 25.4, 16.0. HRMS (ESI<sup>+</sup>) exact mass calcd for  $\text{C}_{23}\text{H}_{33}\text{NO}_3\text{Na}$   $[\text{M}+\text{Na}]^+$  requires  $m/z$  394.2351, found  $m/z$  394.2353.

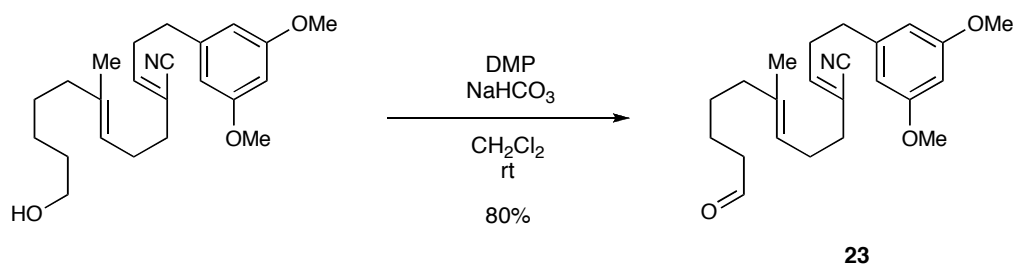

To a solution of the alcohol (598 mg, 1.61 mmol, 1.00 equiv) prepared in the previous step in  $\text{CH}_2\text{Cl}_2$  (16 mL) and solid  $\text{NaHCO}_3$  (676 mg, 8.05 mmol, 5.00 equiv) was added Dess-Martin periodinane (1.02 g, 2.41 mmol, 1.50 equiv) and water (1 drop). The resultant mixture was stirred for 20 min at room temperature. Addition of sat.  $\text{Na}_2\text{CO}_3$  (20 mL) and aqueous  $\text{Na}_2\text{S}_2\text{O}_3$  (10 mL) was followed by extraction with  $\text{CH}_2\text{Cl}_2$  ( $4 \times 15$  mL). The combined organic layers were washed with brine (15 mL), dried ( $\text{MgSO}_4$ ) and concentrated *in vacuo*. Purification of the crude material by flash chromatography (15% EtOAc/hexanes) furnished title compound **23** (477 mg, 80% yield, 13:1 *Z/E*) as a colorless oil.

IR (ATR)  $\nu$  ( $\text{cm}^{-1}$ ) 2935, 2859, 2839, 2718, 1721, 1594, 1459, 1429, 1387, 1349, 1316, 1293, 1260, 1204, 1148, 1057, 1016, 924, 830, 754, 693.  $^1\text{H}$  NMR (500 MHz,  $\text{CDCl}_3$ )  $\delta$  9.77 (br s,  $\text{CHO}$ , 1H), 6.40-6.29 (m,  $\text{ArH}$ , 3H), 6.12 (t,  $J = 7.0$  Hz,  $\text{NCC}=\text{CH}_{\text{vin}}$ , 1H), 5.02 (br s,  $\text{CH}_{\text{vin}}$ , 1H), 3.78 (s,  $\text{OCH}_3$ , 6H), 2.72-2.62 (m,  $2 \times \text{CH}_2$ , 4H), 2.43 (br t,  $J = 7.2$  Hz,  $\text{CH}_2\text{CHO}$ , 2H), 2.24-2.14 (m,  $2 \times \text{CH}_2$ , 4H), 1.98 (t,  $J = 7.5$  Hz,  $\text{CH}_2$ , 2H), 1.64-1.52 (m,  $\text{CH}_2\text{CH}_2\text{CHO}$ , 2H), 1.58 (s,  $\text{CH}_3$ , 3H), 1.45-1.36 (m,  $\text{CH}_2(\text{CH}_2)_2\text{CHO}$ , 2H).  $^{13}\text{C}$  NMR (125 MHz,  $\text{CDCl}_3$ )  $\delta$  202.9, 160.9, 146.7, 142.7, 122.3, 117.7, 115.1, 106.4, 98.2, 55.4, 43.8, 39.3, 35.0, 34.4, 32.7, 27.3, 26.6, 21.6, 16.0.

HRMS (ESI<sup>+</sup>) exact mass calcd for C<sub>23</sub>H<sub>31</sub>NO<sub>3</sub>Na [M+Na]<sup>+</sup> requires *m/z* 392.2196, found *m/z* 392.2197.

## 4.11 Synthesis of Aldehyde 24

### 4.11.1 *tert*-Butyl 3-(3-oxopropyl)-1*H*-indole-1-carboxylate (**51**)

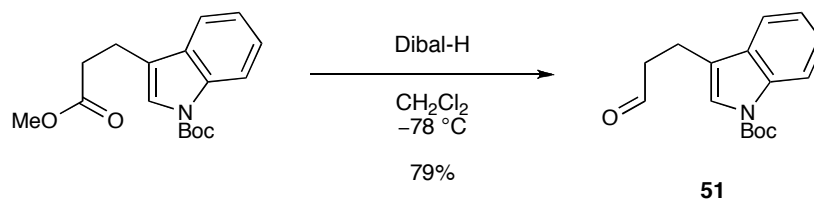

To a solution of *tert*-butyl 3-(3-methoxy-3-oxopropyl)-1*H*-indole-1-carboxylate<sup>18</sup> (2.12 g, 7.00 mmol, 1.00 equiv) in CH<sub>2</sub>Cl<sub>2</sub> (70 mL) at -78 °C was added Dibal-H (7.4 mL of a 1.0M solution in hexanes, 7.4 mmol, 1.05 equiv). After stirring at this temperature had been continued for 1 h the reaction mixture was poured onto ice, diluted with 2M HCl until pH 3-4 was reached and extracted with CH<sub>2</sub>Cl<sub>2</sub> (4 × 30 mL). The combined organic layers were dried (MgSO<sub>4</sub>), concentrated *in vacuo*, and purified by flash chromatography (10% EtOAc/hexanes) to afford title compound **51** (1.51 g, 79%) as a colorless oil that solidified upon standing.

IR (ATR)  $\nu$  (cm<sup>-1</sup>) 3115, 3057, 2991, 2933, 2973, 2891, 2862, 2755, 1913, 1807, 1715, 1607, 1566, 1475, 1455, 1434, 1410, 1396, 1364, 1347, 1307, 1282, 1268, 1256, 1218, 1154, 1085, 1065, 1051, 1013, 944, 900, 857, 837, 808, 793, 767, 757, 745, 686, 662. <sup>1</sup>H NMR (500 MHz, CDCl<sub>3</sub>)  $\delta$  9.87 (t, *J* = 1.2 Hz, CHO, 1H), 8.12 (br s, ArH, 1H), 7.52 (d, *J* = 7.7 Hz, ArH, 1H), 7.37 (br s, ArH, 1H), 7.33 (ddd, *J* = 2 × 7.7, 1.0 Hz, ArH, 1H), 7.25 (ddd, *J* = 2 × 7.7, 1.0 Hz, ArH, 1H), 3.04 (t, *J* = 7.6 Hz, CH<sub>2</sub>, 2H), 2.88 (t, *J* = 7.6 Hz, CH<sub>2</sub>, 2H), 1.66 (s, OC(CH<sub>3</sub>)<sub>3</sub>, 9H). <sup>13</sup>C NMR (125 MHz, CDCl<sub>3</sub>)  $\delta$  201.8, 149.8, 136.2, 130.2, 124.6, 122.7, 122.5, 119.2, 118.8, 115.4, 83.6, 43.2, 28.3, 17.5. HRMS (ESI<sup>+</sup>) exact mass calcd for [M+Na]<sup>+</sup> (C<sub>16</sub>H<sub>19</sub>NO<sub>3</sub>Na) requires *m/z* 296.1257, found *m/z* 296.1257.

(18) Micuch, P.; Seebach, D. *Helv. Chim. Acta* **2002**, *85*, 1567.



4.11.2 Preparation of Diene **54**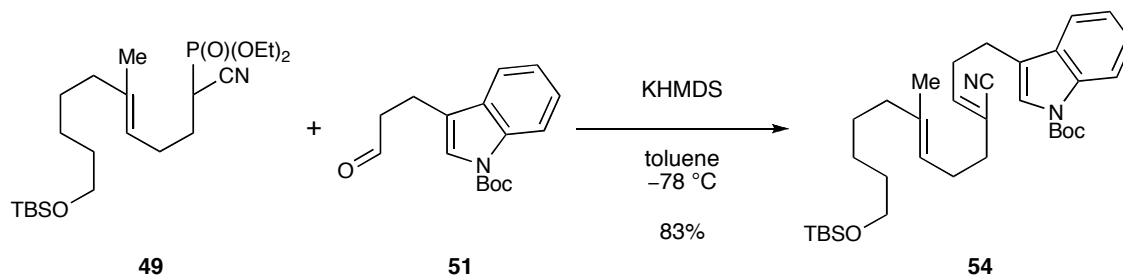

To a solution of phosphonate **49** (1.12 g, 2.50 mmol, 1.00 equiv) in toluene (30 mL) at  $-78\text{ }^\circ\text{C}$  was added dropwise a solution of KHMDS (499 mg, 2.50 mmol, 1.00 equiv) in toluene (5.0 mL). After stirring had been continued for 1 h, a solution of aldehyde **51** (752 mg, 2.50 mmol, 1.00 equiv) in toluene (5.0 mL) was added dropwise via syringe. The reaction mixture was stirred for 2 h at  $-78\text{ }^\circ\text{C}$ , subsequently poured onto sat.  $\text{NH}_4\text{Cl}$  (50 mL), and extracted with EtOAc (4  $\times$  25 mL). The combined organic layers were washed with brine (30 mL), dried ( $\text{MgSO}_4$ ) and concentrated *in vacuo*. Purification by flash chromatography (3%  $\rightarrow$  5% EtOAc/hexanes) afforded title compound **54** (1.17 g, 83%,  $>20:1$  *Z/E*) as a viscous oil.

IR (ATR)  $\nu$  ( $\text{cm}^{-1}$ ) 2929, 2856, 2214, 1731, 1610, 1472, 1453, 1370, 1339, 1308, 1252, 1225, 1156, 1084, 1040, 1018, 937, 833, 813, 767, 744, 661.  $^1\text{H}$  NMR (500 MHz,  $\text{CDCl}_3$ )  $\delta$  8.14 (br s, ArH, 1H), 7.52 (d,  $J = 7.7$  Hz, ArH, 1H), 7.40 (br s, ArH, 1H), 7.33 (dd,  $J = 2 \times 7.4$  Hz, ArH, 1H), 7.25 (dd,  $J = 2 \times 7.2$  Hz, ArH, 1H), 6.20 (t,  $J = 7.4$  Hz,  $\text{NCC}=\text{CH}_{\text{vin}}$ , 1H), 5.03 (br s,  $\text{CH}_{\text{vin}}$ , 1H), 3.59 (t,  $J = 6.6$  Hz,  $\text{CH}_2\text{OSi}$ , 2H), 2.88-2.72 (m,  $2 \times \text{CH}_2$ , 4H), 2.25-2.15 (m,  $2 \times \text{CH}_2$ , 4H), 1.94 (t,  $J = 7.4$  Hz,  $\text{CH}_2$ , 2H), 1.67 (s,  $\text{OC}(\text{CH}_3)_3$ , 9H), 1.58 (s,  $\text{CH}_3$ , 3H), 1.53-1.45 (m,  $\text{CH}_2\text{CH}_2\text{OSi}$ , 2H), 1.36 (tt,  $J = 2 \times 7.4$  Hz,  $\text{CH}_2(\text{CH}_2)_3\text{OSi}$ , 2H), 1.30-1.21 (m,  $\text{CH}_2(\text{CH}_2)_2\text{OSi}$ , 2H), 0.88 (s,  $\text{SiC}(\text{CH}_3)_3$ , 9H), 0.04 (s,  $\text{Si}(\text{CH}_3)_2$ , 6H).  $^{13}\text{C}$  NMR (125 MHz,  $\text{CDCl}_3$ )  $\delta$  149.8, 146.7, 137.4, 135.6, 130.4, 124.5, 122.7, 122.5, 121.7, 119.3, 118.9, 117.7, 115.4, 115.3, 83.6, 63.3, 39.7, 34.5, 32.8, 31.1, 28.3, 27.8, 26.6, 26.1, 25.5, 24.2, 18.5, 16.1,  $-5.2$ . HRMS (ESI $^+$ ) exact mass calcd for  $\text{C}_{34}\text{H}_{53}\text{N}_2\text{O}_3\text{Si}$  [ $\text{M}+\text{H}$ ] $^+$  requires  $m/z$  565.3820, found  $m/z$  565.3817.

4.11.3 Synthesis of Aldehyde **24**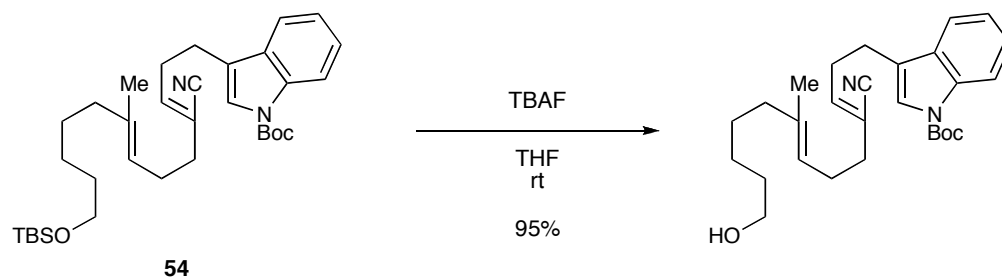

TBAF (2.20 mL of a 1.0M solution in THF, 2.20 mmol, 1.10 equiv) was added slowly to a solution of silyl ether **54** (1.11 g, 1.97 mmol, 1.00 equiv) in THF (18 mL) at room temperature. After stirring had been continued for 2 h, water (20 mL) and sat.  $\text{NH}_4\text{Cl}$  (20 mL) were added and the aqueous layer was extracted with EtOAc (3  $\times$  20 mL). The combined organic layers were washed with brine (20 mL), dried ( $\text{MgSO}_4$ ) and concentrated *in vacuo*. Purification of the crude material by flash chromatography (30% EtOAc/hexanes) furnished the free alcohol (845 mg, 95% yield, 8:1 *Z/E*) as a colorless oil.

IR (ATR)  $\nu$  ( $\text{cm}^{-1}$ ) 3433, 2978, 2932, 2857, 2215, 1729, 1609, 1475, 1452, 1369, 1338, 1308, 1254, 1224, 1154, 1083, 1017, 855, 745, 666.  $^1\text{H}$  NMR (500 MHz,  $\text{CDCl}_3$ )  $\delta$  8.14 (br s, ArH, 1H), 7.53 (d,  $J = 7.8$  Hz, ArH, 1H), 7.40, (br s, ArH, 1H), 7.33 (dd,  $J = 2 \times 7.7$  Hz, ArH, 1H), 7.26 (dd,  $J = 2 \times 7.4$  Hz, ArH, 1H), 6.20 (t,  $J = 7.2$  Hz,  $\text{NCC}=\text{CH}_{\text{vin}}$ , 1H), 5.03 (br s,  $\text{CH}_{\text{vin}}$ , 1H), 3.62 (t,  $J = 6.6$  Hz,  $\text{CH}_2\text{OH}$ , 2H), 2.86-2.72 (m,  $2 \times \text{CH}_2$ , 4H), 2.25-2.16 (m,  $2 \times \text{CH}_2$ , 4H), 1.95 (t,  $J = 7.3$  Hz,  $\text{CH}_2$ , 2H), 1.67 (s,  $\text{OC}(\text{CH}_3)_3$ , 9H), 1.58 (s,  $\text{CH}_3$ , 3H), 1.54 (tt,  $J = 2 \times 7.0$  Hz,  $\text{CH}_2\text{CH}_2\text{OH}$ , 2H), 1.38 (tt,  $J = 2 \times 7.2$  Hz,  $\text{CH}_2(\text{CH}_2)_3\text{OH}$ , 2H), 1.30-1.24 (m,  $\text{CH}_2(\text{CH}_2)_2\text{OH}$ , 2H).  $^{13}\text{C}$  NMR (125 MHz,  $\text{CDCl}_3$ )  $\delta$  149.8, 146.7, 137.4, 135.6, 130.4, 124.5, 122.7, 122.5, 121.8, 119.2, 118.8, 117.7, 115.3, 115.2, 83.6, 63.0, 39.6, 34.4, 32.7, 31.0, 28.2, 27.6, 26.6, 25.3, 24.1, 16.1. HRMS (ESI $^+$ ) exact mass calcd for  $\text{C}_{28}\text{H}_{38}\text{N}_2\text{O}_3\text{Na}$   $[\text{M}+\text{Na}]^+$  requires  $m/z$  473.2775, found  $m/z$  473.2771.

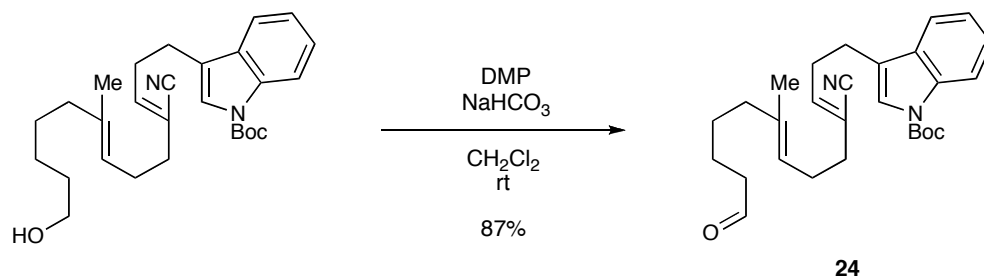

To a solution of the alcohol (800 mg, 1.77 mmol, 1.00 equiv) prepared in the previous step in  $\text{CH}_2\text{Cl}_2$  (18 mL) and solid  $\text{NaHCO}_3$  (743 mg, 8.85 mmol, 5.00 equiv) was added Dess-Martin periodinane (1.13 g, 2.66 mmol, 1.50 equiv) and water (1 drop). The resultant mixture was stirred for 20 min at room temperature. Addition of sat.  $\text{Na}_2\text{CO}_3$  (20 mL) and aqueous  $\text{Na}_2\text{S}_2\text{O}_3$  (10 mL) was followed by extraction with  $\text{CH}_2\text{Cl}_2$  (4  $\times$  15 mL). The combined organic layers were washed with brine (15 mL), dried ( $\text{MgSO}_4$ ) and concentrated *in vacuo*. Purification of the crude material by flash chromatography (15% EtOAc/hexanes) furnished title compound **24** (691 mg, 87% yield, 8:1 *Z/E*) as a colorless oil.

IR (ATR)  $\nu$  ( $\text{cm}^{-1}$ ) 2978, 2933, 2861, 2214, 1726, 1608, 1477, 1452, 1369, 1339, 1308, 1252, 1225, 1154, 1083, 1044, 1017, 938, 854, 766, 745.  $^1\text{H}$  NMR (500 MHz,  $\text{CDCl}_3$ )  $\delta$  9.75 (s,  $\text{CHO}$ , 1H), 8.14 (br s, ArH, 1H), 7.53 (d,  $J = 7.7$  Hz, ArH, 1H), 7.40, (br s, ArH, 1H), 7.33 (dd,  $J = 2 \times 7.7$  Hz, ArH, 1H), 7.26 (dd,  $J = 2 \times 7.3$  Hz, ArH, 1H), 6.21 (t,  $J = 7.2$  Hz,  $\text{NCC}=\text{CH}_{\text{vin}}$ , 1H), 5.03 (br s,  $\text{CH}_{\text{vin}}$ , 1H), 2.86-2.72 (m,  $2 \times \text{CH}_2$ , 4H), 2.40 (t,  $J = 7.3$  Hz,  $\text{CH}_2\text{CHO}$ , 2H), 2.25-2.13 (m,  $2 \times \text{CH}_2$ , 4H), 1.96 (t,  $J = 7.3$  Hz,  $\text{CH}_2$ , 2H), 1.67 (s,  $\text{OC}(\text{CH}_3)_3$ , 9H), 1.60-1.51 (m,  $\text{CH}_2\text{CH}_2\text{CHO}$ , 2H), 1.58 (s,  $\text{CH}_3$ , 3H), 1.38 (tt,  $J = 2 \times 6.9$  Hz,  $\text{CH}_2(\text{CH}_2)_2\text{CHO}$ , 2H).  $^{13}\text{C}$  NMR (125 MHz,  $\text{CDCl}_3$ )  $\delta$  202.9, 149.8, 146.8, 136.7, 135.5, 130.4, 124.5, 122.5, 122.2, 121.5, 119.2, 118.9, 117.7, 115.4, 115.2, 83.6, 43.8, 39.3, 34.4, 31.1, 28.3, 27.3, 26.6, 24.1, 21.6, 16.0. HRMS (ESI $^+$ ) exact mass calcd for  $\text{C}_{28}\text{H}_{36}\text{N}_2\text{O}_3\text{Na}$  [ $\text{M}+\text{Na}$ ] $^+$  requires  $m/z$  471.2618, found  $m/z$  471.2617.



18.5, 16.1, -5.2. HRMS (ESI<sup>+</sup>) exact mass calcd for [M+H]<sup>+</sup> (C<sub>29</sub>H<sub>46</sub>NOSi) requires *m/z* 452.3343, found *m/z* 452.3335.

#### 4.12.2 Synthesis of Aldehyde **25**

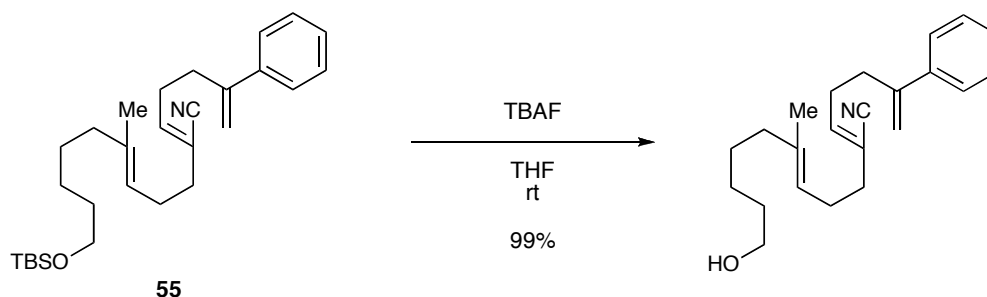

TBAF (2.00 mL of a 1.0M solution in THF, 2.00 mmol, 1.10 equiv) was added slowly to a solution of silyl ether **55** (817 mg, 1.81 mmol, 1.00 equiv) in THF (16 mL) at room temperature. After stirring had been continued for 2 h, water (20 mL) and sat. NH<sub>4</sub>Cl (20 mL) were added and the aqueous layer was extracted with EtOAc (3 × 20 mL). The combined organic layers were washed with brine (20 mL), dried (MgSO<sub>4</sub>) and concentrated *in vacuo*. Purification of the crude material by flash chromatography (20% EtOAc/hexanes) furnished the free alcohol (604 mg, 99% yield, 7:1 *Z/E*) as a colorless oil.

IR (ATR)  $\nu$  (cm<sup>-1</sup>) 3383, 2930, 2856, 2214, 1627, 1599, 1574, 1494, 1442, 1383, 1296, 1241, 1156, 1071, 1049, 1028, 896, 777, 703. <sup>1</sup>H NMR (500 MHz, CDCl<sub>3</sub>)  $\delta$  7.42-7.31 (m, ArH, 4H), 7.31-7.26 (m, ArH, 1H), 6.12 (t, *J* = 7.5 Hz, NCC=CH<sub>vin</sub>, 1H), 5.33 (br s, C=CH<sub>A</sub>H<sub>B</sub>, 1H), 5.09 (br s, C=CH<sub>A</sub>H<sub>B</sub>, 1H), 5.04 (br s, CH<sub>vin</sub>, 1H), 3.63 (t, *J* = 6.5 Hz, CH<sub>2</sub>OH, 2H), 2.68-2.58 (m, CH<sub>2</sub>, 2H), 2.54-2.47 (m, CH<sub>2</sub>, 2H), 2.22-2.10 (m, 2 × CH<sub>2</sub>, 4H), 2.01-1.92 (m, CH<sub>2</sub>, 2H), 1.59 (s, CH<sub>3</sub>, 3H), 1.56 (tt, *J* = 2 × 7.4 Hz, CH<sub>2</sub>CH<sub>2</sub>OH, 2H), 1.44-1.35 (m, CH<sub>2</sub>(CH<sub>2</sub>)<sub>3</sub>OH, 2H), 1.34-1.26 (m, CH<sub>2</sub>(CH<sub>2</sub>)<sub>2</sub>OH, 2H). <sup>13</sup>C NMR (125 MHz, CDCl<sub>3</sub>)  $\delta$  147.0, 146.8, 140.6, 137.2, 128.5, 127.7, 126.2, 121.9, 117.7, 114.8, 113.4, 63.0, 39.6, 34.4, 34.2, 32.7, 30.1, 27.7, 26.6, 25.4, 16.1. HRMS (ESI<sup>+</sup>) exact mass calcd for C<sub>23</sub>H<sub>31</sub>NONa [M+Na]<sup>+</sup> requires *m/z* 360.2298, found *m/z* 360.2298.

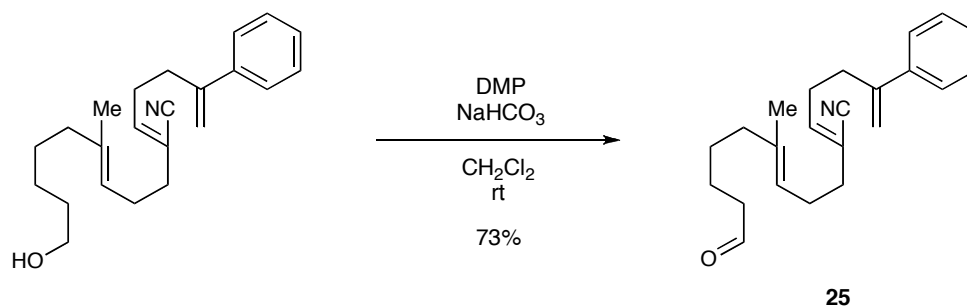

To a solution of the alcohol (630 mg, 1.80 mmol, 1.00 equiv) prepared in the previous step in CH<sub>2</sub>Cl<sub>2</sub> (18 mL) and solid NaHCO<sub>3</sub> (756 mg, 9.00 mmol, 5.00 equiv) was added Dess-Martin periodinane (1.15 g, 2.70 mmol, 1.50 equiv) and water (1 drop). The resultant mixture was stirred for 20 min at room temperature. Addition of sat. Na<sub>2</sub>CO<sub>3</sub> (20 mL) and aqueous Na<sub>2</sub>S<sub>2</sub>O<sub>3</sub> (10 mL) was followed by extraction with CH<sub>2</sub>Cl<sub>2</sub> (4 × 15 mL). The combined organic layers were washed with brine (15 mL), dried (MgSO<sub>4</sub>) and concentrated *in vacuo*. Purification of the crude material by flash chromatography (8% EtOAc/hexanes) furnished the title compound **25** (442 mg, 73% yield, 7:1 *Z/E*) as a colorless oil.

IR (ATR)  $\nu$  (cm<sup>-1</sup>) 3083, 2933, 2858, 2719, 2214, 1722, 1627, 1599, 1574, 1495, 1443, 1410, 1387, 1298, 1242, 1158, 1073, 1027, 897, 778, 703. <sup>1</sup>H NMR (500 MHz, CDCl<sub>3</sub>)  $\delta$  9.76 (br s, CHO, 1H), 7.42-7.31 (m, ArH, 4H), 7.31-7.26 (m, ArH, 1H), 6.12 (t, *J* = 7.4 Hz, NCC=CH<sub>vin</sub>, 1H), 5.33 (br s, C=CH<sub>A</sub>H<sub>B</sub>, 1H), 5.09 (br s, C=CH<sub>A</sub>H<sub>B</sub>, 1H), 5.07 (br s, CH<sub>vin</sub>, 1H), 2.68-2.59 (m, CH<sub>2</sub>, 2H), 2.55-2.47 (m, CH<sub>2</sub>, 2H), 2.45-2.38 (m, CH<sub>2</sub>, 2H), 2.25-2.27 (m, 2 × CH<sub>2</sub>, 4H), 2.03-1.93 (m, CH<sub>2</sub>, 2H), 1.63-1.52 (m, CH<sub>2</sub>CH<sub>2</sub>CHO, 2H), 1.59 (s, CH<sub>3</sub>, 3H), 1.41 (tt, *J* = 7.3 Hz, CH<sub>2</sub>(CH<sub>2</sub>)<sub>2</sub>CHO, 2H). <sup>13</sup>C NMR (125 MHz, CDCl<sub>3</sub>)  $\delta$  202.9, 146.9, 146.8, 140.6, 136.6, 128.5, 127.7, 126.2, 122.3, 117.6, 114.8, 113.4, 43.8, 39.3, 34.4, 34.2, 30.1, 27.3, 26.6, 21.6, 16.0. HRMS (ESI<sup>+</sup>) exact mass calcd for C<sub>23</sub>H<sub>29</sub>NONa [M+Na]<sup>+</sup> requires *m/z* 358.2141, found *m/z* 358.2140.

### 4.13 Synthesis of Tetracyclization Precursor 1

Tetracyclization precursor **1** was prepared in a convergent assembly of fragment **58** and phosphonate **49** (*cf* section 4.9) employing a Horner-Wadsworth-Emmons coupling<sup>16</sup>; deprotection and oxidation completed the synthesis of aldehyde **1** (Scheme S3). Aldehyde **58** was prepared from **56** (prepared in two steps from but-4-yn-1-ol)<sup>20</sup> by cross-coupling with homobenzylic zinc reagent derived from **30** (*cf* section 4.3.1) and a deprotection/oxidation sequence.

**Scheme S3.** Synthetic Access to Tetracyclization Substrate **1**.

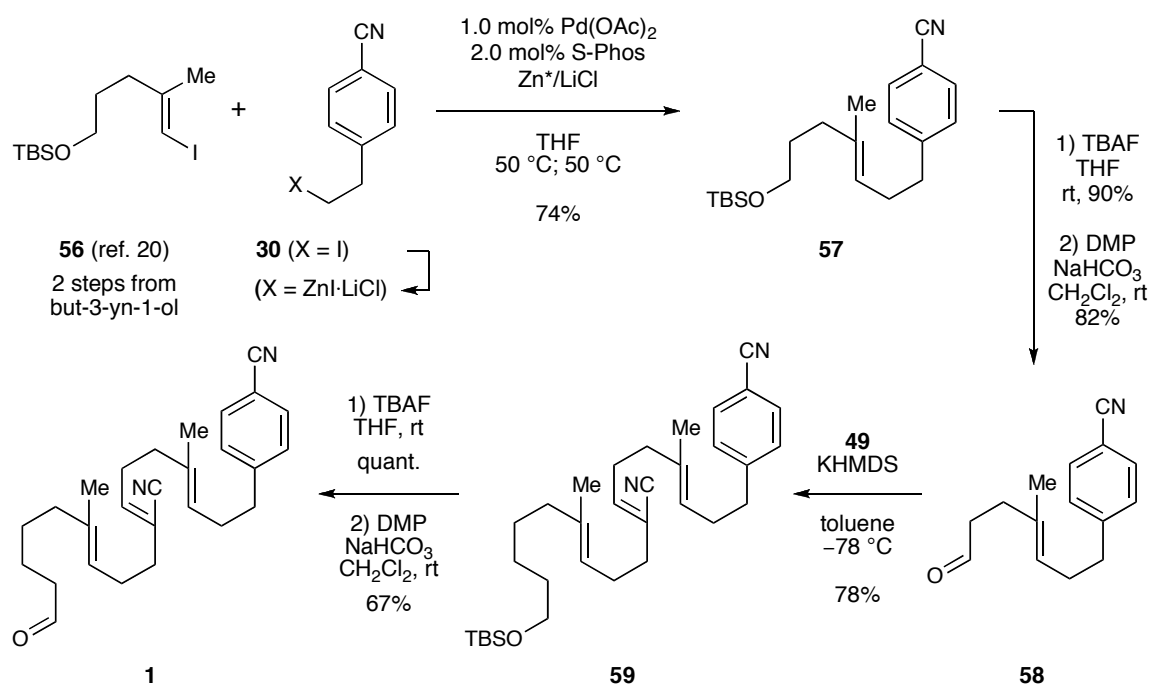

(20) Kujat, C.; Bock, M.; Kirschning, M. *Synlett* **2006**, 419.

4.13.1 Synthesis of Intermediate **57**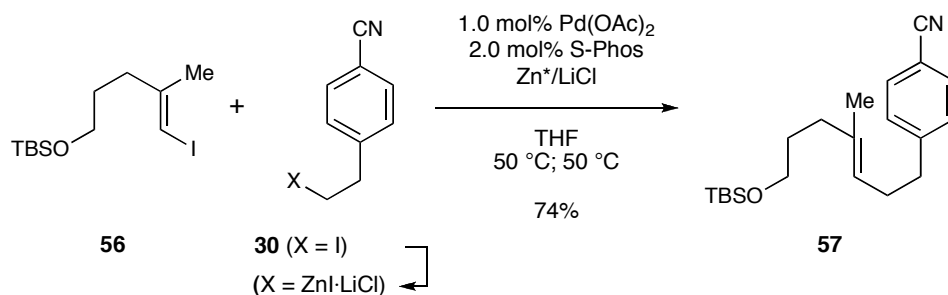

Anhydrous LiCl (530 mg, 12.5 mmol, 1.25 equiv) was placed in an argon-flushed 25-mL Schlenk flask and dried for 30 min at 150-180 °C under high vacuum (<1 torr) with slow stirring. Upon addition of zinc powder (325 mesh, 1.23 g, 18.8 mmol, 1.88 equiv) heating under high vacuum was continued for 30 min. After cooling to room temperature and backfilling with argon, the mixture was suspended with THF (7.5 mL). Subsequently, the zinc powder was activated by sequential addition of 1,2-dibromoethane (54  $\mu$ L, 117 mg, 0.63 mmol, 0.063 equiv), TMSCl (3 drops), and iodine (12 drops of a 1M solution in THF); each addition followed by gentle heating to reflux with a heat gun. Portionwise addition of a solution of alkyl iodide **30** (3.21 g, 12.5 mmol, 1.25 equiv) in THF (5.0 mL) at room temperature and subsequent stirring at for 4 h at 50 °C furnished a solution of homobenzylic zinc iodide that was allowed to cool to room temperature and separated via syringe from remaining zinc powder.

In a separate 50-mL Schlenk flask Pd(OAc)<sub>2</sub> (22.5 mg, 0.100 mmol, 0.0100 equiv) and S-Phos (82.1 mg, 0.200 mmol, 0.0200 equiv) was dissolved in THF (5.0 mL) and a solution of vinyl iodide **56** (3.40 g, 10.0 mmol, 1.00 equiv) in THF (5.0 mL) was added. The previously prepared solution of homobenzylic zinc reagent was quickly added via syringe leading to an exothermic reaction. Further stirring at 50 °C for 3 h was followed by aqueous work-up with sat. NH<sub>4</sub>Cl (50 mL) and extraction with EtOAc (4  $\times$  30 mL). The combined organic layers were washed with brine (30 mL), dried (MgSO<sub>4</sub>), and concentrated under reduced pressure. Purification by flash chromatography (3% EtOAc/hexanes) furnished title compound **57** (2.54 g, 74% yield) as a colorless oil.



IR (ATR)  $\nu$  (cm<sup>-1</sup>) 2929, 2856, 2227, 1608, 1504, 1471, 1462, 1413, 1387, 1360, 1253, 1176, 1095, 1020, 1005, 952, 832, 774, 712, 662. <sup>1</sup>H NMR (500 MHz, CDCl<sub>3</sub>)  $\delta$  7.56 (d,  $J$  = 7.9 Hz, ArH, 2H), 7.28 (d,  $J$  = 8.0 Hz, ArH, 2H), 5.13 (t,  $J$  = 7.1 Hz, CH<sub>vin</sub>, 1H), 3.56 (t,  $J$  = 6.6 Hz, CH<sub>2</sub>OSi, 2H), 2.69 (t,  $J$  = 7.6 Hz, ArCH<sub>2</sub>, 2H), 2.30 (dt,  $J$  = 2  $\times$  7.4 Hz, CH<sub>2</sub>CH<sub>vin</sub>, 2H), 1.99 (t,  $J$  = 7.4 Hz, CH<sub>2</sub>(CH<sub>3</sub>)C=C, 2H), 1.61-1.54 (m, CH<sub>2</sub>CH<sub>2</sub>OSi, 2H), 1.51 (s, CH<sub>3</sub>, 3H), 0.89 (s, SiC(CH<sub>3</sub>)<sub>3</sub>, 9H), 0.05 (s, Si(CH<sub>3</sub>)<sub>2</sub>, 6H). <sup>13</sup>C NMR (125 MHz, CDCl<sub>3</sub>)  $\delta$  148.1, 136.5, 132.1, 129.4, 122.6, 119.3, 109.6, 62.9, 36.3, 35.8, 31.2, 29.4, 26.0, 18.4, 16.1, -5.2. HRMS (ESI<sup>+</sup>) exact mass calcd for C<sub>21</sub>H<sub>33</sub>NOSiNa [M+Na]<sup>+</sup> requires  $m/z$  366.2224, found  $m/z$  366.2223.

#### 4.13.2 Synthesis of Aldehyde **58**

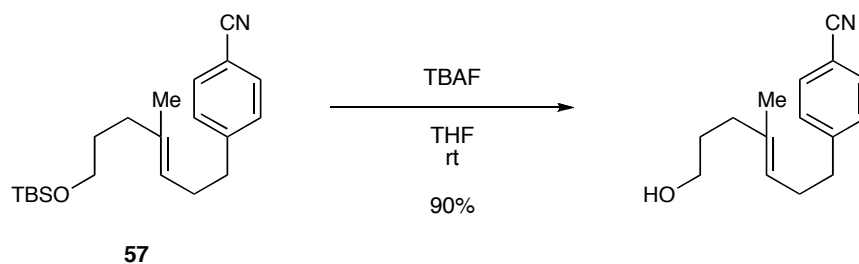

TBAF (8.90 mL of a 1.0M solution in THF, 8.90 mmol, 1.20 equiv) was added slowly to a solution of silyl ether **57** (2.54 g, 7.40 mmol, 1.00 equiv) in THF (60 mL) at room temperature. After stirring had been continued for 2 h, water (50 mL) and sat. NH<sub>4</sub>Cl (50 mL) were added and the aqueous layer was extracted with EtOAc (3  $\times$  40 mL). The combined organic layers were washed with brine (40 mL), dried (MgSO<sub>4</sub>) and concentrated *in vacuo*. Purification of the crude material by flash chromatography (30% EtOAc/hexanes) furnished the free alcohol (1.54 g, 90% yield) as a colorless oil.

IR (ATR)  $\nu$  (cm<sup>-1</sup>) 3360, 2935, 2861, 2227, 1666, 1607, 1504, 1446, 1413, 1383, 1176, 1055, 1020, 919, 822. <sup>1</sup>H NMR (500 MHz, CDCl<sub>3</sub>)  $\delta$  7.56 (d,  $J$  = 8.2 Hz, ArH, 2H), 7.27 (d,  $J$  = 8.4 Hz, ArH, 2H), 5.16 (t,  $J$  = 7.1 Hz, CH<sub>vin</sub>, 1H), 3.60 (t,  $J$  = 6.4 Hz, CH<sub>2</sub>OH, 2H), 2.69 (t,  $J$  = 7.5 Hz, ArCH<sub>2</sub>, 2H), 2.31 (dt,  $J$  = 2  $\times$  7.5 Hz, CH<sub>2</sub>CH<sub>vin</sub>, 2H), 2.04 (t,  $J$  = 7.9 Hz, CH<sub>2</sub>(CH<sub>3</sub>)C=C, 2H), 1.63 (tt,  $J$  = 2  $\times$  6.5 Hz, CH<sub>2</sub>CH<sub>2</sub>OH, 2H), 1.52 (s, CH<sub>3</sub>, 3H), 1.35 (br s, OH, 1H). <sup>13</sup>C NMR (125 MHz, CDCl<sub>3</sub>)  $\delta$  147.9, 136.4, 132.1, 129.4, 123.0, 119.3, 109.6, 62.7, 36.2, 35.9, 30.8, 29.3,

15.9. HRMS (ESI<sup>+</sup>) exact mass calcd for C<sub>15</sub>H<sub>19</sub>NONa [M+Na]<sup>+</sup> requires *m/z* 252.1359, found *m/z* 252.1358.

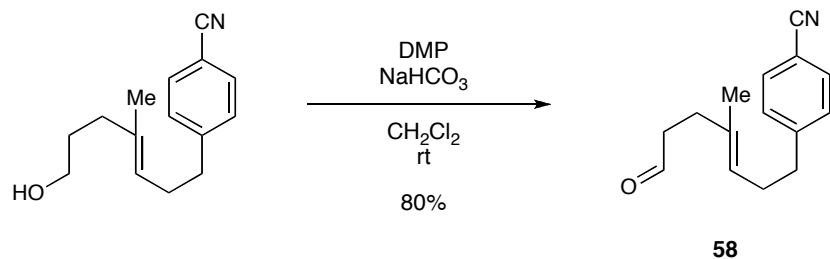

To a solution of the alcohol (1.35 g, 5.89 mmol, 1.00 equiv) prepared in the previous step in CH<sub>2</sub>Cl<sub>2</sub> (60 mL) and solid NaHCO<sub>3</sub> (2.47 g, 29.5 mmol, 5.00 equiv) was added Dess-Martin periodinane (3.75 g, 8.83 mmol, 1.50 equiv) and water (1 drop). The resultant mixture was stirred for 20 min at room temperature. Addition of sat. Na<sub>2</sub>CO<sub>3</sub> (60 mL) and aqueous Na<sub>2</sub>S<sub>2</sub>O<sub>3</sub> (20 mL) was followed by extraction with CH<sub>2</sub>Cl<sub>2</sub> (4 × 40 mL). The combined organic layers were washed with brine (40 mL), dried (MgSO<sub>4</sub>) and concentrated *in vacuo*. Purification of the crude material by flash chromatography (15% EtOAc/hexanes) furnished title compound **58** (1.07 g, 80% yield) as a colorless oil.

IR (ATR)  $\nu$  (cm<sup>-1</sup>) 2919, 2858, 2794, 2226, 1720, 1607, 1504, 1443, 1412, 1387, 1176, 1060, 1001, 826. <sup>1</sup>H NMR (500 MHz, CDCl<sub>3</sub>)  $\delta$  9.74 (t, *J* = 1.8 Hz, CHO, 1H), 7.56 (d, *J* = 8.3 Hz, ArH, 2H), 7.26 (d, *J* = 8.1 Hz, ArH, 2H), 5.15 (t, *J* = 7.1 Hz, CH<sub>vin</sub>, 1H), 2.69 (t, *J* = 7.5 Hz, ArCH<sub>2</sub>, 2H), 2.50 (td, *J* = 7.3, 1.7 Hz, CH<sub>2</sub>CHO, 2H), 2.35-2.26 (m, CH<sub>2</sub>CH<sub>vin</sub>, CH<sub>2</sub>(CH<sub>3</sub>)C=C, 4H), 1.52 (s, CH<sub>3</sub>, 3H). <sup>13</sup>C NMR (125 MHz, CDCl<sub>3</sub>)  $\delta$  202.5, 147.7, 134.4, 132.2, 129.4, 123.7, 119.3, 109.7, 42.1, 36.1, 31.8, 29.3, 16.1. HRMS (ESI<sup>+</sup>) exact mass calcd for C<sub>15</sub>H<sub>17</sub>NONa [M+Na]<sup>+</sup> requires *m/z* 250.1202, found *m/z* 250.1201.

4.13.3 Synthesis of Intermediate **59**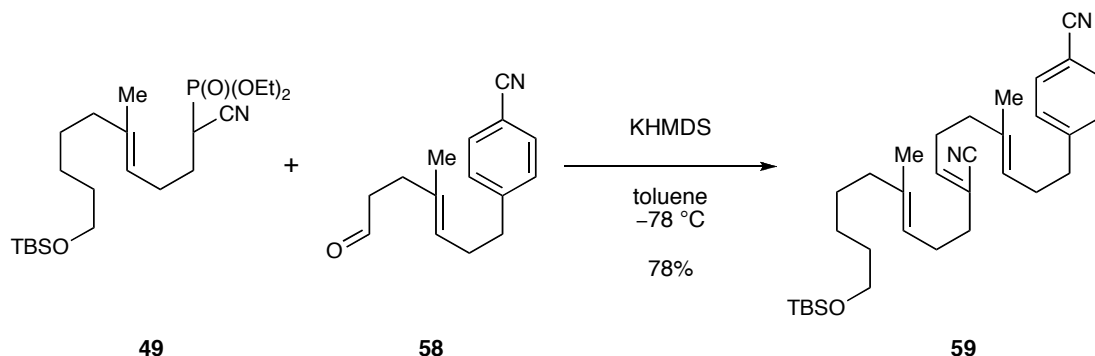

To a solution of phosphonate **49** (1.12 g, 2.50 mmol, 1.00 equiv) in toluene (30 mL) at  $-78\text{ }^{\circ}\text{C}$  was added dropwise a solution of KHMDS (499 mg, 2.50 mmol, 1.00 equiv) in toluene (5.0 mL). After stirring had been continued for 1 h, a solution of aldehyde **58** (568 mg, 2.50 mmol, 1.00 equiv) in toluene (5.0 mL) was added dropwise via syringe. The reaction mixture was stirred for 2 h at  $-78\text{ }^{\circ}\text{C}$ , subsequently poured onto sat.  $\text{NH}_4\text{Cl}$  (40 mL), and extracted with EtOAc ( $4 \times 20$  mL). The combined organic layers were washed with brine (25 mL), dried ( $\text{MgSO}_4$ ) and concentrated *in vacuo*. Purification by flash chromatography (10% EtOAc/hexanes) afforded title compound **59** (1.01 g, 78%, 10:1 *Z/E*) as a viscous oil.

IR (ATR)  $\nu$  ( $\text{cm}^{-1}$ ) 2929, 2856, 2227, 1739, 1608, 1505, 1471, 1462, 1445, 1413, 1386, 1360, 1249, 1176, 1096, 1046, 1006, 938, 833, 774, 710, 662.  $^1\text{H}$  NMR (500 MHz,  $\text{CDCl}_3$ )  $\delta$  7.57 (d,  $J = 8.2$  Hz, ArH, 2H), 7.28 (d,  $J = 8.2$  Hz, ArH, 2H), 6.05 (t,  $J = 7.6$  Hz,  $\text{NCC}=\text{CH}_{\text{vin}}$ , 1H), 5.15 (t,  $J = 7.1$  Hz,  $\text{CH}_{\text{vin}}$ , 1H), 5.04 (br s,  $\text{CH}_{\text{vin}}$ , 1H), 3.59 (t,  $J = 6.3$  Hz,  $\text{CH}_2\text{OSi}$ , 2H), 2.69 (t,  $J = 7.5$  Hz, Ar $\text{CH}_2$ , 2H), 2.42 (dt,  $J = 2 \times 7.5$  Hz,  $\text{CH}_2\text{CH}_{\text{vin}}$ , 2H), 2.31 (dt,  $J = 2 \times 7.4$  Hz,  $\text{CH}_2\text{CH}_{\text{vin}}$ , 2H), 2.26-2.15 (m,  $2 \times \text{CH}_2$ , 4H), 2.07 (t,  $J = 7.6$  Hz,  $\text{CH}_2(\text{CH}_3)\text{C}=\text{C}$ , 2H), 1.96 (t,  $J = 7.5$  Hz,  $\text{CH}_2(\text{CH}_3)\text{C}=\text{C}$ , 2H), 1.60 (s,  $\text{CH}_3$ , 3H), 1.54 (s,  $\text{CH}_3$ , 3H), 1.54-1.45 (m,  $\text{CH}_2\text{CH}_2\text{OSi}$ , 2H), 1.38 (tt,  $J = 2 \times 7.5$  Hz,  $\text{CH}_2(\text{CH}_2)_3\text{OSi}$ , 2H), 1.31-1.23 (m,  $\text{CH}_2(\text{CH}_2)_2\text{OSi}$ , 2H), 0.88 (s,  $\text{SiC}(\text{CH}_3)_3$ , 9H), 0.04 (s,  $\text{Si}(\text{CH}_3)_2$ , 6H).  $^{13}\text{C}$  NMR (125 MHz,  $\text{CDCl}_3$ )  $\delta$  147.8, 147.3, 137.4, 135.0, 132.2, 129.3, 123.9, 121.7, 119.2, 117.8, 114.6, 109.7, 63.3, 39.7, 38.4, 36.1, 34.5, 32.8, 30.0, 29.3, 27.8, 26.7, 26.0, 25.5, 18.5, 16.1, 16.0,  $-5.2$ . HRMS (ESI $^+$ ) exact mass calcd for  $\text{C}_{33}\text{H}_{50}\text{N}_2\text{OSiNa}$   $[\text{M}+\text{Na}]^+$  requires  $m/z$  541.3585, found  $m/z$  541.3581.

## 4.13.4 Synthesis of Aldehyde 1

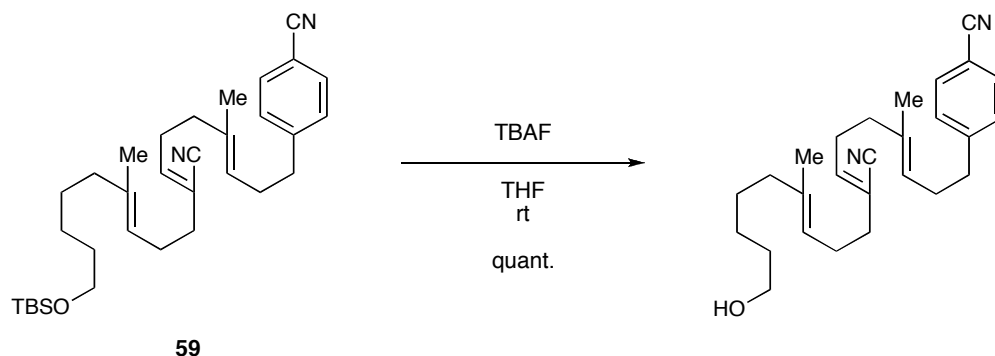

TBAF (2.6 mL of a 1.0M solution in THF, 2.6 mmol, 1.10 equiv) was added slowly to a solution of silyl ether **59** (1.23 g, 2.39 mmol, 1.00 equiv) in THF (22 mL) at room temperature. After stirring had been continued for 1.5 h, water (20 mL) and sat.  $\text{NH}_4\text{Cl}$  (20 mL) were added and the aqueous layer was extracted with EtOAc (4  $\times$  20 mL). The combined organic layers were washed with brine (20 mL), dried ( $\text{MgSO}_4$ ) and concentrated *in vacuo*. Purification of the crude material by flash chromatography (30% EtOAc/hexanes) furnished the free alcohol (967 mg, quant. yield) as a colorless oil.

IR (ATR)  $\nu$  ( $\text{cm}^{-1}$ ) 3332, 2928, 2856, 2227, 1607, 1504, 1438, 1384, 1218, 1176, 1048, 824, 754, 678.  $^1\text{H}$  NMR (500 MHz,  $\text{CDCl}_3$ )  $\delta$  7.58 (d,  $J = 8.2$  Hz, ArH, 2H), 7.28 (d,  $J = 8.2$  Hz, ArH, 2H), 6.07 (t,  $J = 7.6$  Hz,  $\text{NCC}=\text{CH}_{\text{vin}}$ , 1H), 5.15 (t,  $J = 7.1$  Hz,  $\text{CH}_{\text{vin}}$ , 1H), 5.05 (br s,  $\text{CH}_{\text{vin}}$ , 1H), 3.64 (t,  $J = 6.6$  Hz,  $\text{CH}_2\text{OH}$ , 2H), 2.70 (t,  $J = 7.9$  Hz, Ar $\text{CH}_2$ , 2H), 2.42 (dt,  $J = 2 \times 7.5$  Hz,  $\text{CH}_2\text{CH}_{\text{vin}}$ , 2H), 2.32 (dt,  $J = 2 \times 7.4$  Hz,  $\text{CH}_2\text{CH}_{\text{vin}}$ , 2H), 2.26-2.15 (m,  $2 \times \text{CH}_2$ , 4H), 2.07 (t,  $J = 7.6$  Hz,  $\text{CH}_2(\text{CH}_3)\text{C}=\text{C}$ , 2H), 1.98 (t,  $J = 7.5$  Hz,  $\text{CH}_2(\text{CH}_3)\text{C}=\text{C}$ , 2H), 1.62-1.52 (m,  $\text{CH}_2\text{CH}_2\text{OH}$ , 2H), 1.59 (s,  $\text{CH}_3$ , 3H), 1.54 (s,  $\text{CH}_3$ , 3H), 1.44-1.37 (m,  $\text{CH}_2(\text{CH}_2)_3\text{OH}$ , 2H), 1.35-1.28 (m,  $\text{CH}_2(\text{CH}_2)_2\text{OH}$ , 2H).  $^{13}\text{C}$  NMR (125 MHz,  $\text{CDCl}_3$ )  $\delta$  147.8, 147.4, 137.2, 135.0, 132.2, 129.4, 124.0, 121.9, 119.2, 117.8, 114.6, 109.7, 63.0, 39.6, 38.4, 36.1, 34.4, 32.7, 30.0, 29.3, 27.7, 26.7, 25.4, 16.1, 16.0. HRMS (ESI $^+$ ) exact mass calcd for  $\text{C}_{27}\text{H}_{36}\text{N}_2\text{ONa}$   $[\text{M}+\text{Na}]^+$  requires  $m/z$  427.2720, found  $m/z$  427.2718.

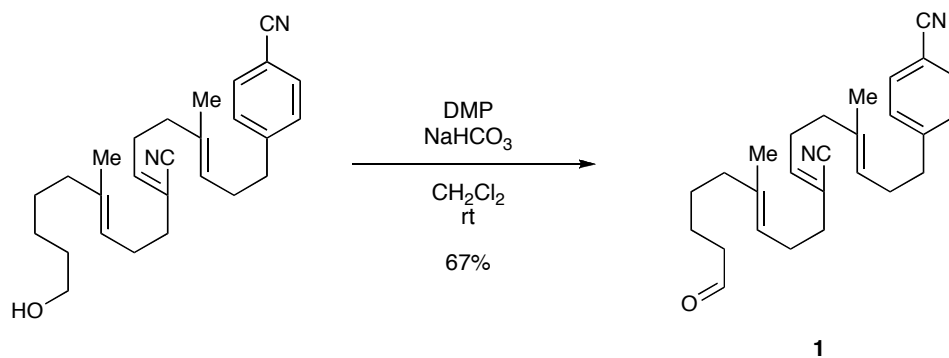

To a solution of the alcohol (967 mg, 2.39 mmol, 1.00 equiv) prepared in the previous step in  $\text{CH}_2\text{Cl}_2$  (25 mL) and solid  $\text{NaHCO}_3$  (1.01 g, 12.0 mmol, 5.00 equiv) was added Dess-Martin periodinane (1.75 g, 4.12 mmol, 1.50 equiv) and water (1 drop). The resultant mixture was stirred for 20 min at room temperature. Addition of sat.  $\text{Na}_2\text{CO}_3$  (20 mL) and aqueous  $\text{Na}_2\text{S}_2\text{O}_3$  (10 mL) was followed by extraction with  $\text{CH}_2\text{Cl}_2$  (4  $\times$  20 mL). The combined organic layers were washed with brine (20 mL), dried ( $\text{MgSO}_4$ ) and concentrated *in vacuo*. Purification of the crude material by flash chromatography (15% EtOAc/hexanes) furnished title compound **1** (602 mg, 67% yield, 92% *E,Z,E*) as a colorless oil.

IR (ATR)  $\nu$  ( $\text{cm}^{-1}$ ) 2925, 2856, 2230, 2212, 1638, 1667, 1606, 1504, 1448, 1384, 1316, 1177, 1155, 1135, 1078, 1054, 1035, 1013, 854, 819, 752, 678.  $^1\text{H}$  NMR (500 MHz,  $\text{CDCl}_3$ )  $\delta$  9.77 (t,  $J = 1.7$  Hz,  $\text{CHO}$ , 1H), 7.57 (d,  $J = 7.7$  Hz,  $\text{ArH}$ , 2H), 7.28 (d,  $J = 8.3$  Hz,  $\text{ArH}$ , 2H), 6.06 (t,  $J = 7.6$  Hz,  $\text{NCC}=\text{CH}_{\text{vin}}$ , 1H), 5.14 (t,  $J = 7.0$  Hz,  $\text{CH}_{\text{vin}}$ , 1H), 5.05 (br s,  $\text{CH}_{\text{vin}}$ , 1H), 2.70 (t,  $J = 7.9$  Hz,  $\text{ArCH}_2$ , 2H), 2.47-2.37 (m,  $\text{CH}_2\text{CHO}$ ,  $\text{CH}_2\text{CH}_{\text{vin}}$ , 4H), 2.31 (dt,  $J = 2 \times 7.4$  Hz,  $\text{CH}_2\text{CH}_{\text{vin}}$ , 2H), 2.27-2.16 (m,  $2 \times \text{CH}_2$ , 4H), 2.07 (t,  $J = 7.5$  Hz,  $\text{CH}_2(\text{CH}_3)\text{C}=\text{C}$ , 2H), 1.99 (t,  $J = 7.5$  Hz,  $\text{CH}_2(\text{CH}_3)\text{C}=\text{C}$ , 2H), 1.62-1.54 (m,  $\text{CH}_2\text{CH}_2\text{CHO}$ , 2H), 1.59 (s,  $\text{CH}_3$ , 3H), 1.54 (s,  $\text{CH}_3$ , 3H), 1.45-1.37 (m,  $\text{CH}_2(\text{CH}_2)_2\text{CHO}$ , 2H).  $^{13}\text{C}$  NMR (125 MHz,  $\text{CDCl}_3$ )  $\delta$  202.8, 147.8, 147.4, 136.6, 135.0, 132.2, 129.3, 124.0, 122.3, 119.2, 117.8, 114.6, 109.7, 43.8, 39.3, 38.4, 36.1, 34.4, 30.0, 29.3, 27.3, 26.7, 21.6, 16.02, 15.98. HRMS (ESI<sup>+</sup>) exact mass calcd for  $\text{C}_{27}\text{H}_{34}\text{N}_2\text{ONa}$  [ $\text{M}+\text{Na}$ ]<sup>+</sup> requires  $m/z$  425.2563, found  $m/z$  425.2557.

#### 4.14 Synthesis of Pentacyclization Precursor 26

Pentacyclization substrate **26** was synthesized following a similar sequence than previously utilized to make tri- and tetracyclization precursors available (Scheme S4). Negishi cross-coupling<sup>5</sup> (**56**<sup>20</sup> → **60**), phosphonylation<sup>15</sup> (**60** → **61**), and two Horner-Wadsworth-Emmons coupling<sup>16</sup> stages (**61** → **62** and **63** → **64**) were used to assemble the polyunsaturated carbon skeleton.

**Scheme S4.** Synthesis of Pentacyclization Substrate **26**.

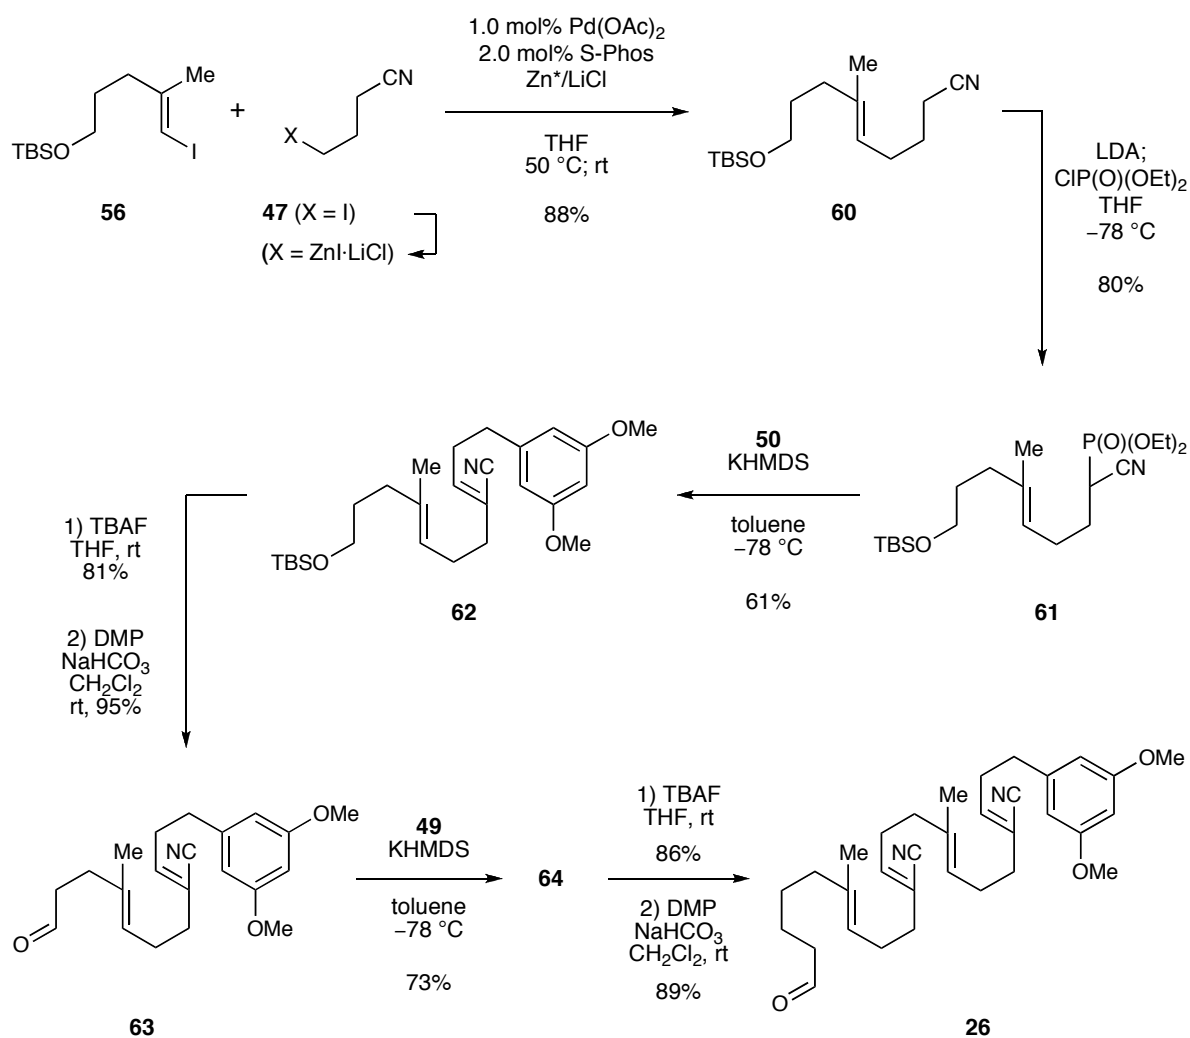

4.14.1 Synthesis of Intermediate **60**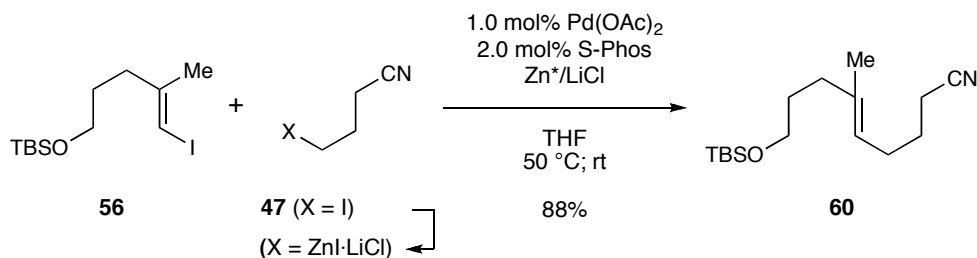

Anhydrous LiCl (636 mg, 15.0 mmol, 1.25 equiv) was placed in an argon-flushed 25-mL Schlenk flask and dried for 30 min at 150-180 °C under high vacuum (<1 torr) with slow stirring. Upon addition of zinc powder (325 mesh, 1.47 g, 22.5 mmol, 1.88 equiv) heating under high vacuum was continued for 30 min. After cooling to room temperature and backfilling with argon, the mixture was suspended with THF (15 mL). Subsequently, the zinc powder was activated by sequential addition of 1,2-dibromoethane (64  $\mu$ L, 141 mg, 0.75 mmol, 0.05 equiv), TMSCl (3 drops), and iodine (15 drops of a 1M solution in THF); each addition followed by gentle heating to reflux with a heat gun. Portionwise addition of alkyl iodide **47** (3.86 g, 15.0 mmol, 1.25 equiv) at room temperature and subsequent stirring at for 4 h at 50 °C furnished a solution of alkyl zinc iodide that was allowed to cool to room temperature and separated via syringe from remaining zinc powder.

In a separate 50-mL Schlenk flask Pd(OAc)<sub>2</sub> (26.9 mg, 0.120 mmol, 0.0100 equiv) and S-Phos (98.5 mg, 0.240 mmol, 0.0200 equiv) was dissolved in THF (10 mL) and a solution of vinyl iodide **56** (4.42 g, 12.0 mmol, 1.00 equiv) in THF (4.0 mL) was added. The previously prepared solution of alkyl zinc reagent was quickly added via syringe leading to an exothermic reaction. Further stirring at room temperature for 3 h was followed by aqueous work-up with sat. NH<sub>4</sub>Cl (50 mL) and extraction with EtOAc (4  $\times$  30 mL). The combined organic layers were washed with brine (30 mL), dried (MgSO<sub>4</sub>), and concentrated under reduced pressure. Purification by flash chromatography (5% EtOAc/hexanes) furnished title compound **60** (3.56 g, 88% yield) as a colorless oil.

IR (ATR)  $\nu$  (cm<sup>-1</sup>) 2929, 2895, 2856, 2248, 1471, 1462, 1386, 1360, 1252, 1187, 1095, 1006, 950, 833, 813, 773, 713, 661. <sup>1</sup>H NMR (500 MHz, CDCl<sub>3</sub>)  $\delta$  5.07 (t,  $J$  = 7.2 Hz, CH<sub>vin</sub>, 1H), 3.58

(t,  $J = 6.5$  Hz,  $\text{CH}_2\text{OSi}$ , 2H), 2.32 (t,  $J = 7.1$  Hz,  $\text{CH}_2\text{CN}$ , 2H), 2.16 (dt,  $J = 2 \times 7.2$  Hz,  $\text{CH}_2\text{CH}_{\text{vin}}$ , 2H), 2.03 (t,  $J = 7.4$  Hz,  $\text{CH}_2(\text{CH}_3)\text{C}=\text{C}$ , 2H), 1.71 (tt,  $J = 2 \times 7.1$  Hz,  $\text{CH}_2\text{CH}_2\text{CN}$ , 2H), 1.66-1.56 (m,  $\text{CH}_2\text{CH}_2\text{OSi}$ , 2H), 1.62 (s,  $\text{CH}_3$ , 3H), 0.89 (s,  $\text{SiC}(\text{CH}_3)_3$ , 9H), 0.04 (s,  $\text{Si}(\text{CH}_3)_2$ , 6H).  $^{13}\text{C}$  NMR (125 MHz,  $\text{CDCl}_3$ )  $\delta$  137.6, 121.8, 120.0, 62.8, 35.9, 31.2, 26.7, 26.0, 25.6, 18.4, 16.5, 16.2,  $-5.2$ . HRMS (ESI<sup>+</sup>) exact mass calcd for  $\text{C}_{16}\text{H}_{32}\text{NOSi}$   $[\text{M}+\text{H}]^+$  requires  $m/z$  282.2248, found  $m/z$  282.2253.

#### 4.14.2 Synthesis of Phosphonate **61**

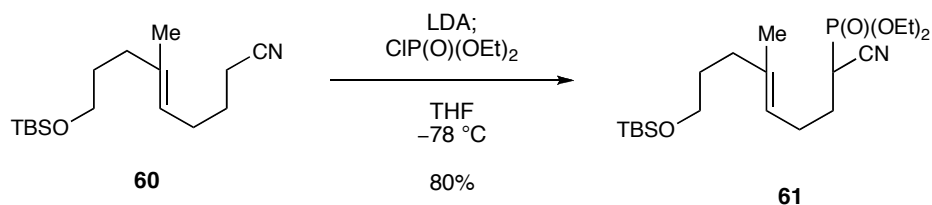

To a solution of *i*-Pr<sub>2</sub>NH (3.04 mL, 2.30 g, 22.7 mmol, 2.20 equiv) in THF (35 mL) was added *n*-BuLi (8.6 mL of a 2.5M solution in hexanes, 21.6 mmol, 2.10 equiv) at  $-78^\circ\text{C}$ . After stirring at  $0^\circ\text{C}$  for 30 min, the reaction mixture was cooled again to  $-78^\circ\text{C}$  and a solution of nitrile **60** (2.90 g, 10.3 mmol, 1.00 equiv) in THF (5 mL) was added and stirred for further 30 min at this temperature. Subsequently, diethyl chlorophosphate (1.48 mL, 1.78 g, 10.3 mmol, 1.05 equiv) was added dropwise to give a bright yellow solution. After 2 h stirring at  $-78^\circ\text{C}$  the reaction mixture was poured onto sat.  $\text{NH}_4\text{Cl}$  (40 mL) and water (40 mL) and the aqueous layer was extracted with EtOAc ( $4 \times 30$  mL). Washing of the combined organic phases with brine (50 mL), drying over  $\text{MgSO}_4$  and evaporation under reduced pressure furnished the crude phosphonate that was purified by flash chromatography (30% EtOAc/hexanes) to give the title compound **61** (3.44 g, 80% yield) as a colorless oil.

IR (ATR)  $\nu$  ( $\text{cm}^{-1}$ ) 2930, 2857, 2242, 1472, 1463, 1445, 1389, 1255, 1163, 1096, 1048, 1016, 962, 903, 833, 813, 773, 714, 662.  $^1\text{H}$  NMR (500 MHz,  $\text{CDCl}_3$ )  $\delta$  5.06 (t,  $J = 7.0$  Hz,  $\text{CH}_{\text{vin}}$ , 1H), 4.29-4.18 (m,  $\text{P}(\text{OCH}_2\text{CH}_3)_2$ , 4H), 3.58 (t,  $J = 6.6$  Hz,  $\text{CH}_2\text{OSi}$ , 2H), 2.93 (ddd,  $J_{\text{C-P}} = 23.3$  Hz,  $J = 8.8, 6.5$  Hz,  $\text{PCHCN}$ , 1H), 2.38-2.19 (m,  $\text{CH}_2\text{CH}_{\text{vin}}$ , 2H), 2.03 (t,  $J = 7.9$  Hz,  $\text{CH}_2(\text{CH}_3)\text{C}=\text{C}$ ,



2H), 1.92 (tt,  $J = 2 \times 7.6$  Hz,  $\text{CH}_2\text{CHCN}$ , 2H), 1.65 (s,  $\text{CH}_3$ , 3H), 1.65-1.55 (m,  $\text{CH}_2\text{CH}_2\text{OSi}$ , 2H), 1.38 (t,  $J = 7.1$  Hz,  $\text{P}(\text{OCH}_2\text{CH}_3)_2$ , 6H), 0.89 (s,  $\text{SiC}(\text{CH}_3)_3$ , 9H), 0.04 (s,  $\text{Si}(\text{CH}_3)_2$ , 6H).  $^{13}\text{C}$  NMR (125 MHz,  $\text{CDCl}_3$ )  $\delta$  138.6, 121.0, 116.5 (d,  $J_{\text{C,P}} = 9.3$  Hz), 64.1 (d,  $J_{\text{C,P}} = 7.0$  Hz), 63.8 (d,  $J_{\text{C,P}} = 6.9$  Hz), 62.8, 35.9, 31.2, 29.3 (d,  $J_{\text{C,P}} = 144$  Hz), 27.1 (d,  $J_{\text{C,P}} = 4.1$  Hz), 26.0, 25.9, 18.4, 16.51 (d,  $J_{\text{C,P}} = 3.8$  Hz), 16.47 (d,  $J_{\text{C,P}} = 3.9$  Hz), 16.3,  $-5.2$ .  $^{31}\text{P}$  NMR (202 MHz,  $\text{CDCl}_3$ )  $\delta$  18.4. HRMS (ESI<sup>+</sup>) exact mass calcd for  $\text{C}_{20}\text{H}_{41}\text{NO}_4\text{PSi}$   $[\text{M}+\text{H}]^+$  requires  $m/z$  418.2537, found  $m/z$  418.2537.

#### 4.14.3 Synthesis of Diene **62**

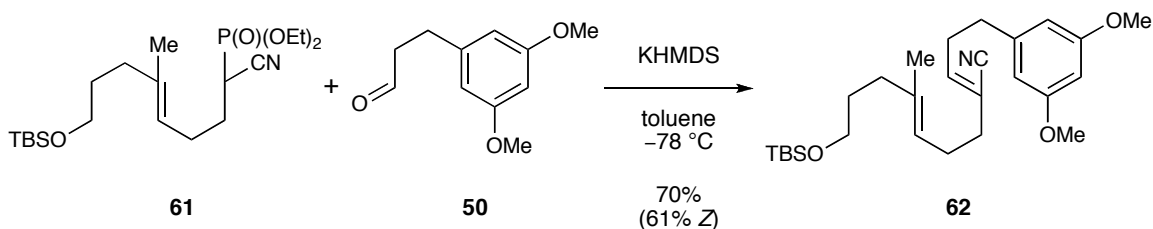

To a solution of phosphonate **61** (2.23 g, 5.34 mmol, 1.00 equiv) in toluene (90 mL) at  $-78^\circ\text{C}$  was added dropwise a solution of KHMDS (1.08 g, 5.34 mmol, 1.00 equiv) in toluene (10 mL). After stirring had been continued for 1 h, a solution of aldehyde **50**<sup>17</sup> (876 mg, 5.34 mmol, 1.00 equiv) in toluene (10 mL) was added dropwise via syringe. The reaction mixture was stirred for 2 h at  $-78^\circ\text{C}$ , subsequently poured onto sat.  $\text{NH}_4\text{Cl}$  (80 mL), and extracted with EtOAc (4  $\times$  40 mL). The combined organic layers were washed with brine (40 mL), dried ( $\text{MgSO}_4$ ) and concentrated *in vacuo*. Purification by flash chromatography (4% EtOAc/hexanes) afforded title compound **62** (1.48 g, 61%,  $>20:1$  Z/E) and its diastereomer (227 mg, 9% yield, 1:3 Z/E) as viscous oils.

IR (ATR)  $\nu$  ( $\text{cm}^{-1}$ ) 2929, 2856, 2214, 1595, 1461, 1429, 1386, 1350, 1316, 1293, 1253, 1204, 1150, 1095, 1066, 1006, 939, 925, 831, 774, 693, 661.  $^1\text{H}$  NMR (500 MHz,  $\text{CDCl}_3$ )  $\delta$  6.38-6.28 (m, ArH, 3H), 6.12 (t,  $J = 6.8$  Hz,  $\text{NCC}=\text{CH}_{\text{vin}}$ , 1H), 5.04 (br s,  $\text{CH}_{\text{vin}}$ , 1H), 3.79 (s,  $\text{OCH}_3$ , 6H), 3.58 (t,  $J = 6.5$  Hz,  $\text{CH}_2\text{OSi}$ , 2H), 2.74-2.61 (m,  $2 \times \text{CH}_2$ , 4H), 2.21-2.15 (m,  $2 \times \text{CH}_2$ , 4H), 2.00 (t,  $J = 7.4$  Hz,  $\text{CH}_2$ , 2H), 1.65-1.54 (m,  $\text{CH}_2\text{CH}_2\text{OSi}$ , 2H), 1.60 (s,  $\text{CH}_3$ , 3H), 0.89 (s,  $\text{SiC}(\text{CH}_3)_3$ ,

9H), 0.04 (s, Si(CH<sub>3</sub>)<sub>2</sub>, 6H). <sup>13</sup>C NMR (125 MHz, CDCl<sub>3</sub>) δ 160.9, 146.6, 142.7, 136.9, 121.8, 117.7, 115.1, 106.4, 98.2, 62.9, 55.4, 35.8, 35.1, 34.5, 32.8, 31.2, 26.7, 26.0, 18.4, 16.2, -5.2. HRMS (ESI<sup>+</sup>) exact mass calcd for C<sub>27</sub>H<sub>43</sub>NO<sub>3</sub>SiNa [M+Na]<sup>+</sup> requires *m/z* 480.2904, found *m/z* 480.2902.

#### 4.14.4 Synthesis of Aldehyde **63**

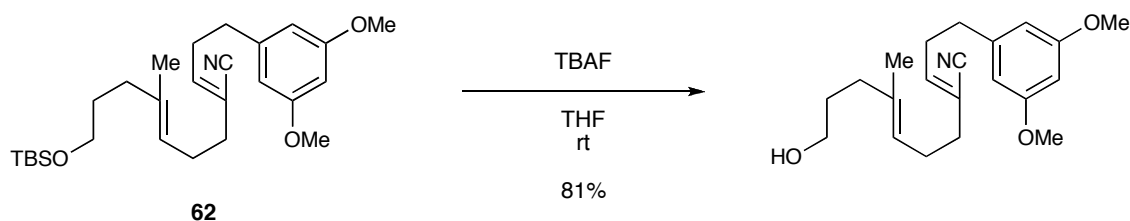

TBAF (3.5 mL of a 1.0M solution in THF, 3.5 mmol, 1.10 equiv) was added slowly to a solution of silyl ether **62** (1.47 g, 3.20 mmol, 1.00 equiv) in THF (30 mL) at room temperature. After stirring had been continued for 1.5 h, water (30 mL) and sat. NH<sub>4</sub>Cl (30 mL) were added and the aqueous layer was extracted with EtOAc (4 × 25 mL). The combined organic layers were washed with brine (30 mL), dried (MgSO<sub>4</sub>) and concentrated *in vacuo*. Purification of the crude material by flash chromatography (30% EtOAc/hexanes) furnished the free alcohol (889 mg, 81% yield) as a colorless oil.

IR (ATR)  $\nu$  (cm<sup>-1</sup>) 3446, 2937, 2840, 2214, 1594, 1459, 1428, 1384, 1349, 1313, 1293, 1204, 1148, 1056, 1014, 923, 830, 693. <sup>1</sup>H NMR (500 MHz, CDCl<sub>3</sub>) δ 6.36-6.29 (m, ArH, 3H), 6.12 (t, *J* = 6.9 Hz, NCC=CH<sub>vin</sub>, 1H), 5.06 (br s, CH<sub>vin</sub>, 1H), 3.79 (s, OCH<sub>3</sub>, 6H), 3.62 (td, *J* = 2 × 5.8 Hz, CH<sub>2</sub>OH, 2H), 2.74-2.62 (m, 2 × CH<sub>2</sub>, 4H), 2.25-2.15 (m, 2 × CH<sub>2</sub>, 4H), 2.05 (t, *J* = 6.7 Hz, CH<sub>2</sub>, 2H), 1.69-1.54 (m, CH<sub>2</sub>CH<sub>2</sub>OH, 2H), 1.61 (s, CH<sub>3</sub>, 3H), 1.43 (br s, OH). <sup>13</sup>C NMR (125 MHz, CDCl<sub>3</sub>) δ 160.9, 146.8, 142.6, 136.8, 122.3, 117.7, 115.0, 106.5, 98.2, 62.7, 55.4, 35.8, 35.0, 34.4, 32.7, 30.7, 26.6, 16.1. HRMS (ESI<sup>+</sup>) exact mass calcd for C<sub>21</sub>H<sub>29</sub>NO<sub>3</sub>Na [M+Na]<sup>+</sup> requires *m/z* 366.2040, found *m/z* 366.2039.

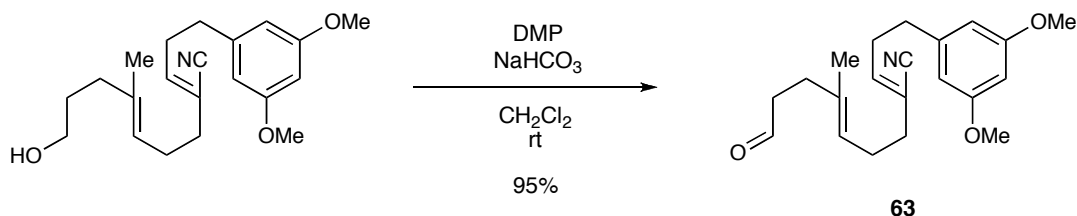

To a solution of the alcohol (859 mg, 2.50 mmol, 1.00 equiv) prepared in the previous step in  $\text{CH}_2\text{Cl}_2$  (25 mL) and solid  $\text{NaHCO}_3$  (1.05 g, 12.5 mmol, 5.00 equiv) was added Dess-Martin periodinane (1.59 g, 3.75 mmol, 1.50 equiv) and water (1 drop). The resultant mixture was stirred for 20 min at room temperature. Addition of sat.  $\text{Na}_2\text{CO}_3$  (25 mL) and aqueous  $\text{Na}_2\text{S}_2\text{O}_3$  (10 mL) was followed by extraction with  $\text{CH}_2\text{Cl}_2$  (4  $\times$  20 mL). The combined organic layers were washed with brine (20 mL), dried ( $\text{MgSO}_4$ ) and concentrated *in vacuo*. Purification of the crude material by flash chromatography (20% EtOAc/hexanes) furnished title compound **63** (811 mg, 95% yield, >20:1 *Z:E*) as a colorless oil.

IR (ATR)  $\nu$  ( $\text{cm}^{-1}$ ) 2937, 2839, 2722, 2213, 1721, 1594, 1459, 1429, 1388, 1349, 1312, 1293, 1261, 1204, 1148, 1057, 1015, 993, 924, 831, 693.  $^1\text{H}$  NMR (500 MHz,  $\text{CDCl}_3$ )  $\delta$  9.75 (br s,  $\text{CHO}$ , 1H), 6.37-6.28 (m,  $\text{ArH}$ , 3H), 6.12 (t,  $J = 6.9$  Hz,  $\text{NCC}=\text{CH}_{\text{vin}}$ , 1H), 4.99 (br s,  $\text{CH}_{\text{vin}}$ , 1H), 3.79 (s,  $\text{OCH}_3$ , 6H), 2.73-2.63 (m,  $2 \times \text{CH}_2$ , 4H), 2.51 (t,  $J = 7.4$  Hz,  $\text{CH}_2\text{CHO}$ , 2H), 2.31 (t,  $J = 7.5$  Hz,  $\text{CH}_2\text{CH}_2\text{CHO}$ , 2H), 2.17-2.08 (m,  $2 \times \text{CH}_2$ , 4H), 1.62 (s,  $\text{CH}_3$ , 3H).  $^{13}\text{C}$  NMR (125 MHz,  $\text{CDCl}_3$ )  $\delta$  202.5, 160.9, 146.9, 142.6, 135.2, 122.9, 117.6, 114.9, 106.4, 98.2, 55.3, 42.0, 35.0, 34.2, 32.6, 31.7, 26.6, 16.3. HRMS (ESI $^+$ ) exact mass calcd for  $\text{C}_{21}\text{H}_{28}\text{NO}_3$  [ $\text{M}+\text{H}$ ] $^+$  requires  $m/z$  342.2064, found  $m/z$  342.2064.

#### 4.14.5 Synthesis of Tetraene **64**

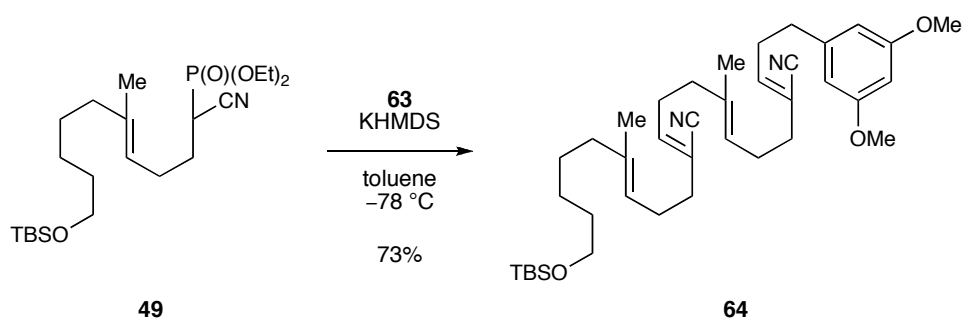

To a solution of phosphonate **49** (987 mg, 2.21 mmol, 1.00 equiv) in toluene (30 mL) at  $-78\text{ }^{\circ}\text{C}$  was added dropwise a solution of KHMDS (441 mg, 2.21 mmol, 1.00 equiv) in toluene (3.0 mL). After stirring had been continued for 1 h, a solution of aldehyde **63** (755 mg, 2.21 mmol, 1.00 equiv) in toluene (3.0 mL) was added dropwise via syringe. The reaction mixture was stirred for 2 h at  $-78\text{ }^{\circ}\text{C}$ , subsequently poured onto sat.  $\text{NH}_4\text{Cl}$  (40 mL), and extracted with EtOAc ( $4 \times 20$  mL). The combined organic layers were washed with brine (20 mL), dried ( $\text{MgSO}_4$ ) and concentrated *in vacuo*. Purification by flash chromatography (5%  $\rightarrow$  10% EtOAc/hexanes) afforded title compound **64** (1.02 g, 73%,  $>95\%$  *E,Z,E,Z*) as a viscous oil.

IR (ATR)  $\nu$  ( $\text{cm}^{-1}$ ) 2929, 2856, 2214, 1596, 1461, 1429, 1386, 1350, 1293, 1254, 1204, 1150, 1096, 1066, 1006, 938, 924, 832, 774, 693, 660.  $^1\text{H}$  NMR (500 MHz,  $\text{CDCl}_3$ )  $\delta$  6.38-6.29 (m, ArH, 3H), 6.14 (t,  $J = 6.5$  Hz,  $\text{NCC}=\text{CH}_{\text{vin}}$ , 1H), 6.08 (t,  $J = 7.5$  Hz,  $\text{NCC}=\text{CH}_{\text{vin}}$ , 1H), 5.11-4.98 (m,  $2 \times \text{CH}_{\text{vin}}$ , 2H), 3.79 (s,  $\text{OCH}_3$ , 6H), 3.59 (t,  $J = 6.6$  Hz,  $\text{CH}_2\text{OSi}$ , 2H), 2.73-2.62 (m,  $2 \times \text{CH}_2$ , 4H), 2.43 (dt,  $J = 2 \times 7.4$  Hz,  $\text{NCC}=\text{CH}_{\text{vin}}\text{CH}_2$ , 2H), 2.25-2.15 (m,  $4 \times \text{CH}_2$ , 8H), 2.06 (t,  $J = 7.5$  Hz,  $\text{CH}_2$ , 2H), 1.96 (t,  $J = 7.5$  Hz,  $\text{CH}_2$ , 2H), 1.62 (s,  $\text{CH}_3$ , 3H), 1.59 (s,  $\text{CH}_3$ , 3H), 1.51 (tt,  $J = 2 \times 7.2$  Hz,  $\text{CH}_2\text{CH}_2\text{OSi}$ , 2H), 1.38 (tt,  $J = 2 \times 7.4$  Hz,  $\text{CH}_2(\text{CH}_2)_3\text{OSi}$ , 2H), 1.27 (tt,  $J = 2 \times 7.5$  Hz,  $\text{CH}_2(\text{CH}_2)_2\text{OSi}$ , 2H), 0.89 (s,  $\text{Si}(\text{CH}_3)_3$ , 9H), 0.04 (s,  $\text{Si}(\text{CH}_3)_2$ , 6H).  $^{13}\text{C}$  NMR (125 MHz,  $\text{CDCl}_3$ )  $\delta$  160.9, 147.3, 146.8, 142.6, 137.3, 135.5, 123.2, 121.7, 117.8, 117.6, 115.0, 114.6, 106.4, 98.2, 63.3, 55.4, 39.7, 38.3, 35.0, 34.5, 34.3, 32.8, 32.7, 30.0, 27.8, 26.7 ( $2 \times \text{CH}_2$ ), 26.1, 25.5, 18.5, 16.11, 16.09,  $-5.2$ . HRMS ( $\text{ESI}^+$ ) exact mass calcd for  $\text{C}_{39}\text{H}_{60}\text{N}_2\text{O}_3\text{SiNa}$   $[\text{M}+\text{Na}]^+$  requires  $m/z$  655.4265, found  $m/z$  655.4260.

#### 4.14.6 Synthesis of Aldehyde **26**

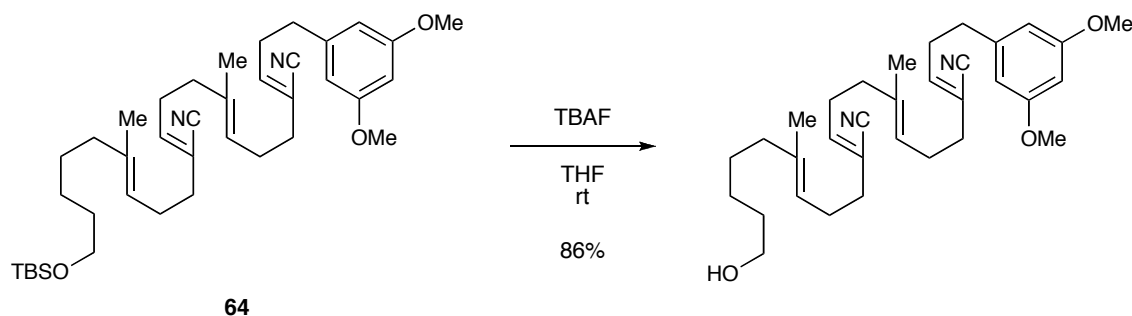

TBAF (1.72 mL of a 1.0M solution in THF, 1.72 mmol, 1.10 equiv) was added slowly to a solution of silyl ether **64** (984 mg, 1.56 mmol, 1.00 equiv) in THF (15 mL) at room temperature. After stirring had been continued for 1.5 h, water (15 mL) and sat.  $\text{NH}_4\text{Cl}$  (15 mL) were added and the aqueous layer was extracted with EtOAc ( $4 \times 15$  mL). The combined organic layers were washed with brine (20 mL), dried ( $\text{MgSO}_4$ ) and concentrated *in vacuo*. Purification of the crude material by flash chromatography (40% EtOAc/hexanes) furnished the free alcohol (692 mg, 86% yield, >95% *E,Z,E,Z*) as a colorless oil.

IR (ATR)  $\nu$  ( $\text{cm}^{-1}$ ) 3525, 2930, 2856, 2214, 1736, 1595, 1459, 1429, 1384, 1350, 1313, 1293, 1242, 1204, 1149, 1057, 924, 830, 730, 693, 655.  $^1\text{H}$  NMR (500 MHz,  $\text{CDCl}_3$ )  $\delta$  6.37-6.27 (m, ArH, 3H), 6.14 (t,  $J = 6.8$  Hz,  $\text{NCC}=\text{CH}_{\text{vin}}$ , 1H), 6.09 (t,  $J = 7.4$  Hz,  $\text{NCC}=\text{CH}_{\text{vin}}$ , 1H), 5.11-4.99 (m,  $2 \times \text{CH}_{\text{vin}}$ , 2H), 3.78 (s,  $\text{OCH}_3$ , 6H), 3.63 (td,  $J = 2 \times 5.0$  Hz,  $\text{CH}_2\text{OH}$ , 2H), 2.73-2.63 (m,  $2 \times \text{CH}_2$ , 4H), 2.43 (dt,  $J = 2 \times 7.4$  Hz,  $\text{NCC}=\text{CH}_{\text{vin}}\text{CH}_2$ , 2H), 2.24-2.14 (m,  $4 \times \text{CH}_2$ , 8H), 2.07 (t,  $J = 7.4$  Hz,  $\text{CH}_2$ , 2H), 1.97 (t,  $J = 7.5$  Hz,  $\text{CH}_2$ , 2H), 1.62 (s,  $\text{CH}_3$ , 3H), 1.59 (s,  $\text{CH}_3$ , 3H), 1.56 (tt,  $J = 2 \times 7.2$  Hz,  $\text{CH}_2\text{CH}_2\text{OH}$ , 2H), 1.40 (tt,  $J = 2 \times 7.6$  Hz,  $\text{CH}_2(\text{CH}_2)_3\text{OH}$ , 2H), 1.31 (tt,  $J = 2 \times 7.5$  Hz,  $\text{CH}_2(\text{CH}_2)_2\text{OH}$ , 2H).  $^{13}\text{C}$  NMR (125 MHz,  $\text{CDCl}_3$ )  $\delta$  160.9, 147.4, 146.8, 142.6, 137.2, 135.4, 123.2, 121.9, 117.8, 117.6, 115.0, 114.5, 106.4, 98.2, 63.0, 55.3, 39.6, 38.3, 35.0, 34.4, 34.3, 32.7 ( $2 \times \text{CH}_2$ ), 29.9, 27.7, 26.7 ( $2 \times \text{CH}_2$ ), 25.4, 16.07, 16.05. HRMS (ESI $^+$ ) exact mass calcd for  $\text{C}_{33}\text{H}_{46}\text{N}_2\text{O}_3\text{SiNa}$   $[\text{M}+\text{Na}]^+$  requires  $m/z$  541.3401, found  $m/z$  541.3401.

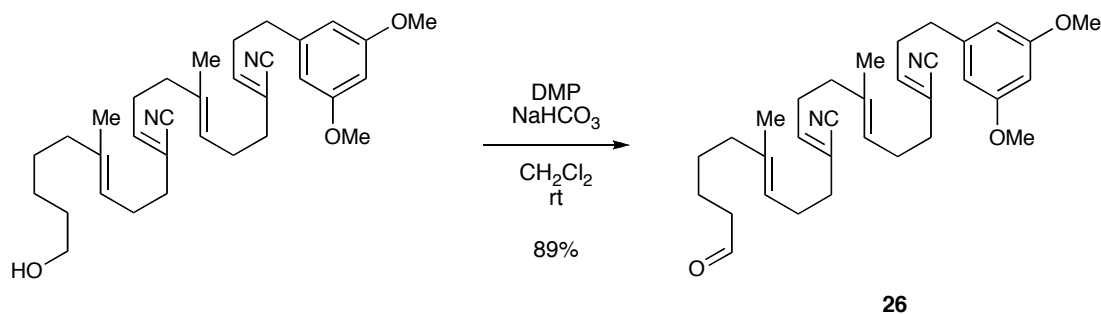

To a solution of the alcohol (609 mg, 1.17 mmol, 1.00 equiv) prepared in the previous step in  $\text{CH}_2\text{Cl}_2$  (15 mL) and solid  $\text{NaHCO}_3$  (491 mg, 5.85 mmol, 5.00 equiv) was added Dess-Martin periodinane (491 mg, 1.76 mmol, 1.50 equiv) and water (1 drop). The resultant mixture was

stirred for 20 min at room temperature. Addition of sat.  $\text{Na}_2\text{CO}_3$  (15 mL) and aqueous  $\text{Na}_2\text{S}_2\text{O}_3$  (5 mL) was followed by extraction with  $\text{CH}_2\text{Cl}_2$  ( $4 \times 15$  mL). The combined organic layers were washed with brine (15 mL), dried ( $\text{MgSO}_4$ ) and concentrated *in vacuo*. Purification of the crude material by flash chromatography (20% EtOAc/hexanes) furnished title compound **26** (541 mg, 89% yield, >95% *E,Z,E,Z*) as a colorless oil.

IR (ATR)  $\nu$  ( $\text{cm}^{-1}$ ) 2935, 2859, 2723, 2213, 1722, 1595, 1458, 1429, 1386, 1350, 1315, 1293, 1240, 1204, 1149, 1058, 924, 831, 754, 694, 666.  $^1\text{H}$  NMR (500 MHz,  $\text{CDCl}_3$ )  $\delta$  9.77 (br s, CHO, 1H), 6.36-6.29 (m, ArH, 3H), 6.14 (t,  $J = 6.7$  Hz,  $\text{NCC}=\text{CH}_{\text{vin}}$ , 1H), 6.09 (t,  $J = 7.4$  Hz,  $\text{NCC}=\text{CH}_{\text{vin}}$ , 1H), 5.13-5.00 (m,  $2 \times \text{CH}_{\text{vin}}$ , 2H), 3.78 (s,  $\text{OCH}_3$ , 6H), 2.74-2.63 (m,  $2 \times \text{CH}_2$ , 4H), 2.46-2.38 (m,  $2 \times \text{CH}_2$ , 4H), 2.25-2.15 (m,  $4 \times \text{CH}_2$ , 8H), 2.07 (t,  $J = 7.5$  Hz,  $\text{CH}_2$ , 2H), 1.99 (t,  $J = 7.5$  Hz, 2H), 1.64-1.53 (m,  $\text{CH}_2\text{CHO}$ , 2H), 1.61 (s,  $\text{CH}_3$ , 3H), 1.59 (s,  $\text{CH}_3$ , 3H), 1.41 (tt,  $J = 2 \times 7.6$  Hz,  $\text{CH}_2\text{CH}_2\text{CHO}$ , 2H).  $^{13}\text{C}$  NMR (125 MHz,  $\text{CDCl}_3$ )  $\delta$  202.9, 160.9, 147.4, 146.8, 142.6, 136.6, 135.4, 123.2, 122.3, 117.8, 117.6, 115.0, 114.5, 106.4, 98.2, 55.4, 43.8, 39.3, 38.3, 35.0, 34.4, 34.3, 32.7, 30.0, 27.3, 26.7 ( $2 \times \text{CH}_2$ ), 21.6, 16.1, 16.0. HRMS (ESI<sup>+</sup>) exact mass calcd for  $\text{C}_{33}\text{H}_{45}\text{N}_2\text{O}_3$   $[\text{M}+\text{H}]^+$  requires  $m/z$  517.3425, found  $m/z$  517.3425.

#### 4.15 Synthesis of Hexacyclization Precursor 27

Hexacyclization precursor **27** was prepared following a similar sequence as outlined above: Terminating unit **58** (*cf* section 4.13) was coupled with fragment **61** (*cf* section 4.14) to give triene **65** (Scheme S5). Upon deprotection and oxidation, and second Horner-Wadsworth-Emmons coupling<sup>16</sup> with phosphonate **49** (*cf* section 4.9) completed the assembly of the carbocyclic skeleton leading to silyl ether **67** that was further elaborated to give the desired aldehyde **27**.

**Scheme S5.** Synthesis of Hexacyclization Substrate **27**.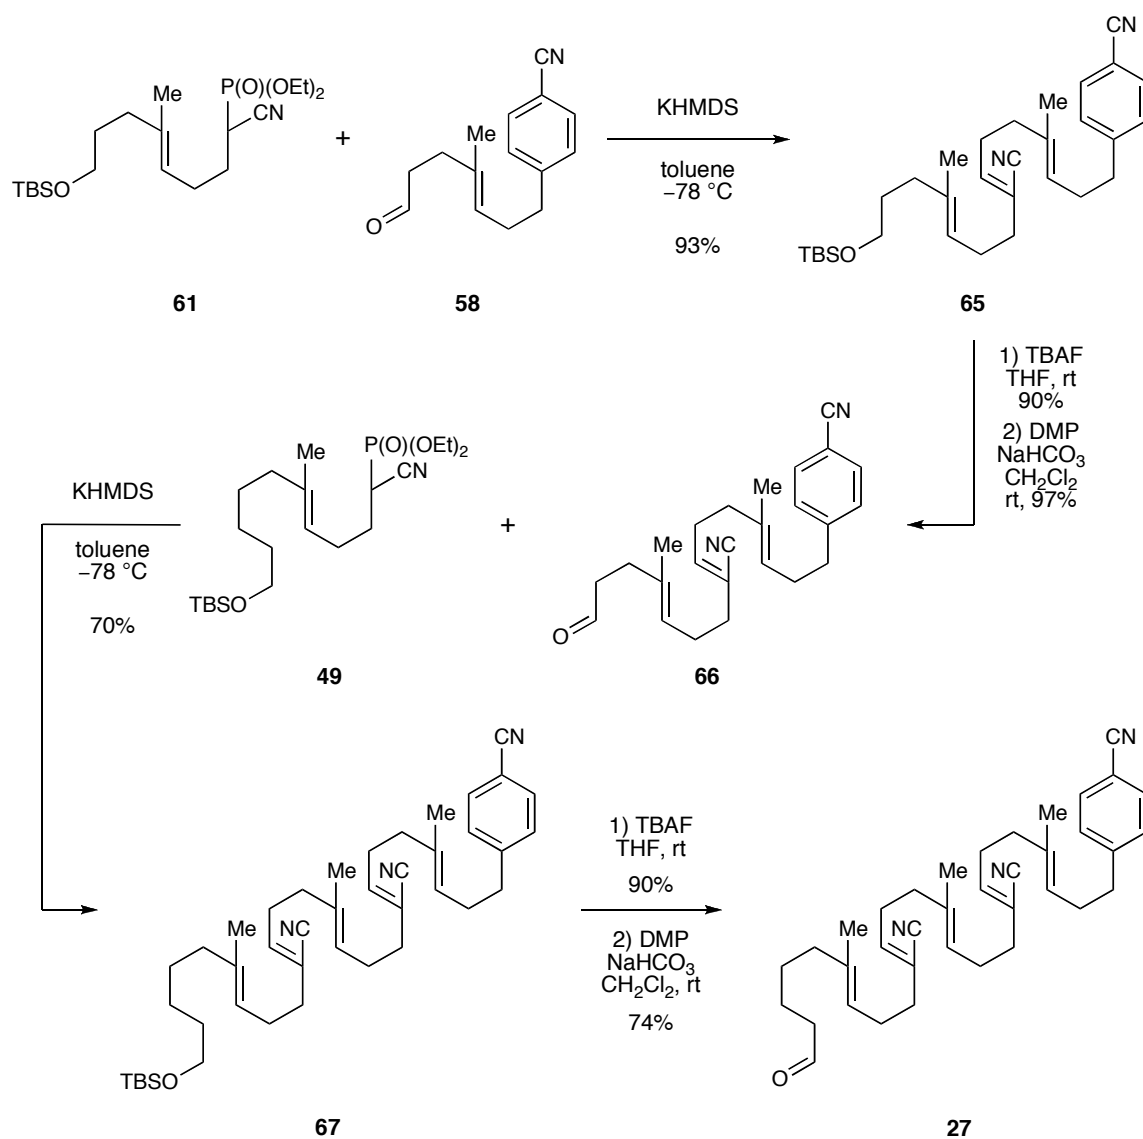4.15.1 Synthesis of Triene **65**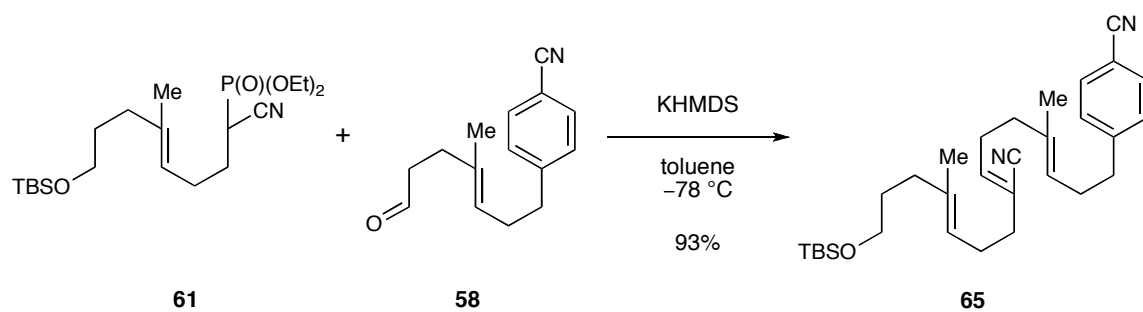

To a solution of phosphonate **61** (1.13 g, 2.71 mmol, 1.00 equiv) in toluene (36 mL) at  $-78\text{ }^{\circ}\text{C}$  was added dropwise a solution of KHMDS (541 mg, 2.71 mmol, 1.00 equiv) in toluene (6.0 mL). After stirring had been continued for 1 h, a solution of aldehyde **58** (615 mg, 2.71 mmol, 1.00 equiv) in toluene (6.0 mL) was added dropwise via syringe. The reaction mixture was stirred for 2 h at  $-78\text{ }^{\circ}\text{C}$ , subsequently poured onto sat.  $\text{NH}_4\text{Cl}$  (50 mL), and extracted with EtOAc ( $4 \times 25$  mL). The combined organic layers were washed with brine (25 mL), dried ( $\text{MgSO}_4$ ) and concentrated *in vacuo*. Purification by flash chromatography (5%  $\rightarrow$  10% EtOAc/hexanes) afforded title compound **65** (1.24 g, 93%, 15:1 *Z/E*) as a viscous oil.

IR (ATR)  $\nu$  ( $\text{cm}^{-1}$ ) 2928, 2856, 2227, 1608, 1505, 1471, 1444, 1413, 1386, 1360, 1252, 1177, 1095, 1021, 1006, 953, 833, 774, 756, 665.  $^1\text{H}$  NMR (500 MHz,  $\text{CDCl}_3$ )  $\delta$  7.58 (d,  $J = 8.2$  Hz, ArH, 2H), 7.28 (d,  $J = 8.2$  Hz, ArH, 2H), 6.07 (t,  $J = 7.5$  Hz,  $\text{NCC}=\text{CH}_{\text{vin}}$ , 1H), 5.15 (t,  $J = 7.1$  Hz,  $\text{CH}_{\text{vin}}$ , 1H), 5.06 (br s,  $\text{CH}_{\text{vin}}$ , 1H), 3.58 (t,  $J = 6.5$  Hz,  $\text{CH}_2\text{OSi}$ , 2H), 2.70 (t,  $J = 7.9$  Hz,  $\text{ArCH}_2$ , 2H), 2.42 (dt,  $J = 2 \times 7.5$  Hz,  $\text{CH}_2\text{CH}_{\text{vin}}$ , 2H), 2.32 (dt,  $J = 2 \times 7.4$  Hz,  $\text{CH}_2\text{CH}_{\text{vin}}$ , 2H), 2.27-2.16 (m,  $2 \times \text{CH}_2$ , 4H), 2.07 (t,  $J = 7.6$  Hz,  $\text{CH}_2(\text{CH}_3)\text{C}=\text{C}$ , 2H), 2.01 (t,  $J = 7.5$  Hz,  $\text{CH}_2(\text{CH}_3)\text{C}=\text{C}$ , 2H), 1.64-1.56 (m,  $\text{CH}_2\text{CH}_2\text{OSi}$ , 2H), 1.61 (s,  $\text{CH}_3$ , 3H), 1.55 (s,  $\text{CH}_3$ , 3H), 0.89 (s,  $\text{SiC}(\text{CH}_3)_3$ , 9H), 0.04 (s,  $\text{Si}(\text{CH}_3)_2$ , 6H).  $^{13}\text{C}$  NMR (125 MHz,  $\text{CDCl}_3$ )  $\delta$  147.8, 147.3, 136.9, 135.0, 132.2, 129.3, 124.0, 121.9, 119.2, 117.8, 114.6, 109.7, 62.9, 38.4, 36.1, 35.9, 34.4, 31.2, 30.0, 29.3, 26.7, 26.0, 18.4, 16.2, 16.0,  $-5.2$ . HRMS ( $\text{ESI}^+$ ) exact mass calcd for  $\text{C}_{31}\text{H}_{46}\text{N}_2\text{OSiNa}$   $[\text{M}+\text{Na}]^+$  requires  $m/z$  513.3272, found  $m/z$  513.3270.

#### 4.15.2 Synthesis of Aldehyde **66**

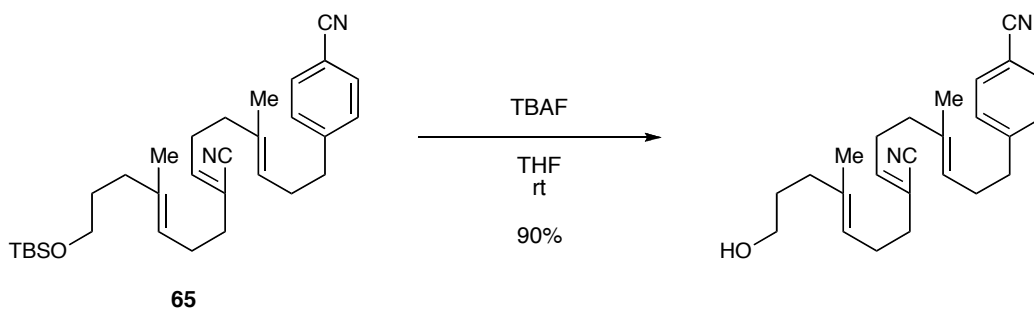



TBAF (2.80 mL of a 1.0M solution in THF, 2.80 mmol, 1.10 equiv) was added slowly to a solution of silyl ether **65** (1.24 g, 2.53 mmol, 1.00 equiv) in THF (23 mL) at room temperature. After stirring had been continued for 1.5 h, water (20 mL) and sat.  $\text{NH}_4\text{Cl}$  (20 mL) were added and the aqueous layer was extracted with EtOAc (4 × 20 mL). The combined organic layers were washed with brine (20 mL), dried ( $\text{MgSO}_4$ ) and concentrated *in vacuo*. Purification of the crude material by flash chromatography (30% EtOAc/hexanes) furnished the free alcohol (857 mg, 90% yield, 91% *E,Z,E*) as a colorless oil.

IR (ATR)  $\nu$  ( $\text{cm}^{-1}$ ) 3434, 2935, 2859, 2227, 1666, 1607, 1504, 1444, 1414, 1385, 1176, 1056, 1020, 824, 754, 666.  $^1\text{H}$  NMR (500 MHz,  $\text{CDCl}_3$ )  $\delta$  7.56 (d,  $J = 8.2$  Hz, ArH, 2H), 7.27 (d,  $J = 8.3$  Hz, ArH, 2H), 6.05 (t,  $J = 7.5$  Hz,  $\text{NCC}=\text{CH}_{\text{vin}}$ , 1H), 5.13 (t,  $J = 6.7$  Hz,  $\text{CH}_{\text{vin}}$ , 1H), 5.09 (br s,  $\text{CH}_{\text{vin}}$ , 1H), 3.60 (t,  $J = 6.9$  Hz,  $\text{CH}_2\text{OH}$ , 2H), 2.68 (t,  $J = 7.8$  Hz,  $\text{ArCH}_2$ , 2H), 2.40 (dt,  $J = 2 \times 7.6$  Hz,  $\text{CH}_2\text{CH}_{\text{vin}}$ , 2H), 2.30 (dt,  $J = 2 \times 7.4$  Hz,  $\text{CH}_2\text{CH}_{\text{vin}}$ , 2H), 2.24-2.12 (m,  $2 \times \text{CH}_2$ , 4H), 2.10-2.01 (m,  $2 \times \text{CH}_2(\text{CH}_3)\text{C}=\text{C}$ , 4H), 1.69-1.61 (m,  $\text{CH}_2\text{CH}_2\text{OH}$ , 2H), 1.61 (s,  $\text{CH}_3$ , 3H), 1.53 (s,  $\text{CH}_3$ , 3H).  $^{13}\text{C}$  NMR (125 MHz,  $\text{CDCl}_3$ )  $\delta$  147.8, 147.5, 136.7, 135.0, 132.1, 129.3, 123.9, 122.3, 119.2, 117.7, 114.5, 109.6, 62.6, 38.3, 36.1, 35.9, 34.4, 30.7, 29.9, 29.3, 26.7, 16.1, 15.9. HRMS (ESI<sup>+</sup>) exact mass calcd for  $\text{C}_{25}\text{H}_{32}\text{N}_2\text{ONa}$   $[\text{M}+\text{Na}]^+$  requires  $m/z$  399.2407, found  $m/z$  399.2407.

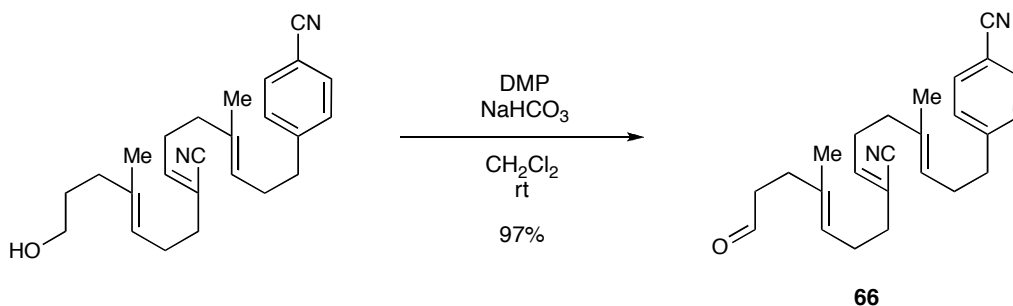

To a solution of the alcohol (1.13 g, 3.00 mmol, 1.00 equiv) prepared in the previous step in  $\text{CH}_2\text{Cl}_2$  (30 mL) and solid  $\text{NaHCO}_3$  (1.26 g, 15.0 mmol, 5.00 equiv) was added Dess-Martin periodinane (1.91 g, 4.50 mmol, 1.50 equiv) and water (1 drop). The resultant mixture was stirred for 20 min at room temperature. Addition of sat.  $\text{Na}_2\text{CO}_3$  (30 mL) and aqueous  $\text{Na}_2\text{S}_2\text{O}_3$  (10 mL) was followed by extraction with  $\text{CH}_2\text{Cl}_2$  (4 × 20 mL). The combined organic layers

were washed with brine (20 mL), dried ( $\text{MgSO}_4$ ) and concentrated *in vacuo*. Purification of the crude material by flash chromatography (30% EtOAc/hexanes) furnished title compound **66** (1.09 g, 97% yield, 91% *E,Z,E*) as a colorless oil.

IR (ATR)  $\nu$  ( $\text{cm}^{-1}$ ) 2922, 2857, 2227, 1721, 1607, 1504, 1444, 1413, 1386, 1224, 1177, 1092, 1020, 825, 752, 666.  $^1\text{H}$  NMR (500 MHz,  $\text{CDCl}_3$ )  $\delta$  9.74 (t,  $J = 1.7$  Hz, CHO, 1H), 7.56 (d,  $J = 8.2$  Hz, ArH, 2H), 7.27 (d,  $J = 8.2$  Hz, ArH, 2H), 6.05 (t,  $J = 7.5$  Hz,  $\text{NCC}=\text{CH}_{\text{vin}}$ , 1H), 5.14 (t,  $J = 6.5$  Hz,  $\text{CH}_{\text{vin}}$ , 1H), 5.08 (br s,  $\text{CH}_{\text{vin}}$ , 1H), 2.69 (t,  $J = 7.4$  Hz,  $\text{ArCH}_2$ , 2H), 2.52 (td,  $J = 7.3$ , 1.8 Hz,  $\text{CH}_2\text{CHO}$ , 2H), 2.41 (dt,  $J = 2 \times 7.4$  Hz,  $\text{CH}_2\text{CH}_{\text{vin}}$ , 2H), 2.36-2.27 (m,  $2 \times \text{CH}_2$ , 4H), 2.25-2.14 (m,  $2 \times \text{CH}_2(\text{CH}_3)\text{C}=\text{C}$ , 4H), 2.06 (t,  $J = 7.5$  Hz,  $\text{CH}_2\text{CH}_2\text{CHO}$ , 2H), 1.62 (s,  $\text{CH}_3$ , 3H), 1.53 (s,  $\text{CH}_3$ , 3H).  $^{13}\text{C}$  NMR (125 MHz,  $\text{CDCl}_3$ )  $\delta$  202.5, 147.8, 147.6, 135.1, 134.9, 132.1, 129.3, 123.9, 123.0, 119.2, 117.7, 114.5, 109.6, 42.0, 38.3, 36.1, 34.2, 31.7, 29.9, 29.3, 26.6, 16.3, 15.9. HRMS (ESI $^+$ ) exact mass calcd for  $\text{C}_{25}\text{H}_{30}\text{N}_2\text{ONa}$   $[\text{M}+\text{Na}]^+$  requires  $m/z$  397.2250, found  $m/z$  397.22251.

#### 4.15.3 Synthesis of Pentaene **67**

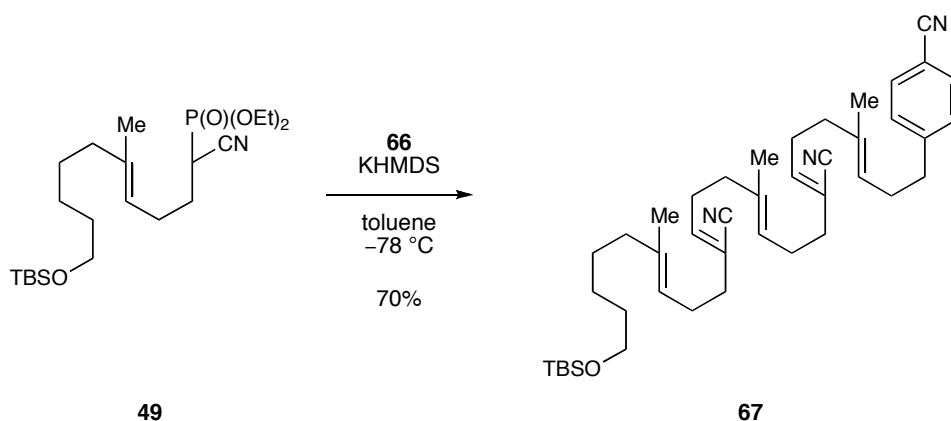

To a solution of phosphonate **49** (978 mg, 2.19 mmol, 1.00 equiv) in toluene (30 mL) at  $-78^\circ\text{C}$  was added dropwise a solution of KHMDS (437 mg, 2.19 mmol, 1.00 equiv) in toluene (5.0 mL). After stirring had been continued for 1 h, a solution of aldehyde **66** (820 mg, 2.19 mmol, 1.00 equiv) in toluene (5.0 mL) was added dropwise via syringe. The reaction mixture was stirred for 2 h at  $-78^\circ\text{C}$ , subsequently poured onto sat.  $\text{NH}_4\text{Cl}$  (50 mL), and extracted with EtOAc (4  $\times$  25

mL). The combined organic layers were washed with brine (25 mL), dried ( $\text{MgSO}_4$ ) and concentrated *in vacuo*. Purification by flash chromatography (5%→10% EtOAc/hexanes) afforded the title compound **67** (1.03 g, 70%, 91% *E,Z,E,Z,E*) as a viscous oil.

IR (ATR)  $\nu$  ( $\text{cm}^{-1}$ ) 2928, 2856, 2227, 2214, 1608, 1504, 1440, 1386, 1360, 1253, 1176, 1096, 1006, 938, 833, 774, 661.  $^1\text{H}$  NMR (500 MHz,  $\text{CDCl}_3$ )  $\delta$  7.57 (d,  $J = 8.1$  Hz, ArH, 2H), 7.28 (d,  $J = 8.2$  Hz, ArH, 2H), 6.13-6.05 (m,  $2 \times \text{NCC}=\text{CH}_{\text{vin}}$ , 2H), 5.15 (t,  $J = 6.7$  Hz,  $\text{CH}_{\text{vin}}$ , 1H), 5.09 (br s,  $\text{CH}_{\text{vin}}$ , 1H), 5.04 (br s,  $\text{CH}_{\text{vin}}$ , 1H), 3.59 (t,  $J = 6.6$  Hz,  $\text{CH}_2\text{OSi}$ , 2H), 2.70 (t,  $J = 7.5$  Hz, Ar $\text{CH}_2$ , 2H), 2.48-2.38 (m,  $2 \times \text{CH}_2\text{CH}_{\text{vin}}$ , 4H), 2.32 (dt,  $J = 2 \times 7.3$  Hz,  $\text{CH}_2\text{CH}_{\text{vin}}$ , 2H), 2.27-2.15 (m,  $4 \times \text{CH}_2$ , 8H), 2.14-2.03 (m,  $2 \times \text{CH}_2(\text{CH}_3)\text{C}=\text{C}$ , 4H), 1.96 (t,  $J = 7.5$  Hz,  $\text{CH}_2(\text{CH}_3)\text{C}=\text{C}$ , 2H), 1.65 (s,  $\text{CH}_3$ , 3H), 1.59 (s,  $\text{CH}_3$ , 3H), 1.54 (s,  $\text{CH}_3$ , 3H), 1.54-1.46 (m,  $\text{CH}_2\text{CH}_2\text{OSi}$ , 2H), 1.38 (tt,  $J = 2 \times 7.5$  Hz,  $\text{CH}_2(\text{CH}_2)_3\text{OSi}$ , 2H), 1.31-1.22 (m,  $\text{CH}_2(\text{CH}_2)_2\text{OSi}$ , 2H), 0.89 (s,  $\text{SiC}(\text{CH}_3)_3$ , 9H), 0.04 (s,  $\text{Si}(\text{CH}_3)_2$ , 6H).  $^{13}\text{C}$  NMR (125 MHz,  $\text{CDCl}_3$ )  $\delta$  147.8, 147.5, 147.3, 137.4, 135.5, 135.0, 132.2, 129.3, 124.0, 123.2, 121.7, 119.2, 117.8, 117.7, 114.6, 114.5, 109.7, 63.3, 39.7, 38.4, 38.3, 36.1, 34.5, 34.3, 32.8, 30.02, 30.01, 29.3, 27.8, 26.8, 26.7, 26.0, 25.5, 18.5, 16.2, 16.1, 16.0, -5.2. HRMS (ESI $^+$ ) exact mass calcd for  $\text{C}_{43}\text{H}_{63}\text{N}_3\text{OSiNa}$   $[\text{M}+\text{Na}]^+$  requires  $m/z$  688.4633, found  $m/z$  688.4629.

#### 4.15.4 Synthesis of Aldehyde **27**

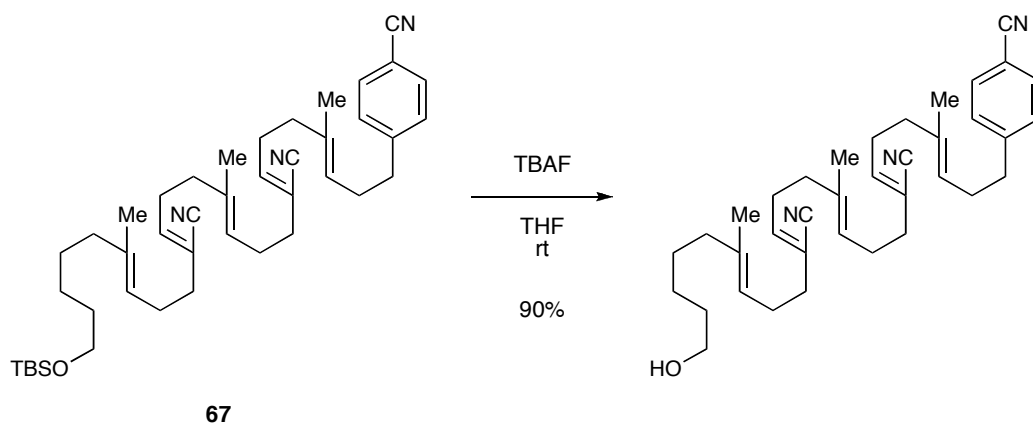

TBAF (1.60 mL of a 1.0M solution in THF, 1.60 mmol, 1.14 equiv) was added slowly to a solution of silyl ether **67** (932 mg, 1.40 mmol, 1.00 equiv) in THF (13 mL) at room temperature.

After stirring had been continued for 1.5 h, water (20 mL) and sat.  $\text{NH}_4\text{Cl}$  (20 mL) were added and the aqueous layer was extracted with EtOAc ( $4 \times 20$  mL). The combined organic layers were washed with brine (20 mL), dried ( $\text{MgSO}_4$ ) and concentrated *in vacuo*. Purification of the crude material by flash chromatography (30% EtOAc/hexanes) furnished the free alcohol (857 mg, 90% yield, 88% *E,Z,E,Z,E*) as a colorless oil.

IR (ATR)  $\nu$  ( $\text{cm}^{-1}$ ) 3518, 2925, 2856, 2230, 2212, 1667, 1638, 1606, 1504, 1448, 1384, 1316, 1177, 1135, 1078, 1054, 1035, 1013, 854, 819, 752, 678.  $^1\text{H}$  NMR (500 MHz,  $\text{CDCl}_3$ )  $\delta$  7.57 (d,  $J = 8.2$  Hz, ArH, 2H), 7.28 (d,  $J = 8.2$  Hz, ArH, 2H), 6.14-6.05 (m,  $2 \times \text{NCC}=\text{CH}_{\text{vin}}$ , 2H), 5.15 (t,  $J = 6.2$  Hz,  $\text{CH}_{\text{vin}}$ , 1H), 5.09 (br s,  $\text{CH}_{\text{vin}}$ , 1H), 5.04 (br s,  $\text{CH}_{\text{vin}}$ , 1H), 3.63 (t,  $J = 6.4$  Hz,  $\text{CH}_2\text{OH}$ , 2H), 2.70 (t,  $J = 7.7$  Hz, Ar $\text{CH}_2$ , 2H), 2.48-2.37 (m,  $2 \times \text{CH}_2\text{CH}_{\text{vin}}$ , 4H), 2.36-2.28 (m,  $\text{CH}_2\text{CH}_{\text{vin}}$ , 2H), 2.27-2.15 (m,  $4 \times \text{CH}_2$ , 8H), 2.13-2.04 (m,  $2 \times \text{CH}_2(\text{CH}_3)\text{C}=\text{C}$ , 4H), 1.98 (t,  $J = 7.2$  Hz,  $\text{CH}_2(\text{CH}_3)\text{C}=\text{C}$ , 2H), 1.63 (s,  $\text{CH}_3$ , 3H), 1.61-1.52 (m,  $\text{CH}_2\text{CH}_2\text{OH}$ , 2H), 1.59 (s,  $\text{CH}_3$ , 3H), 1.54 (s,  $\text{CH}_3$ , 3H), 1.44-1.28 (m,  $\text{CH}_2(\text{CH}_2)_3\text{OH}$ ,  $\text{CH}_2(\text{CH}_2)_2\text{OH}$ , 4H).  $^{13}\text{C}$  NMR (125 MHz,  $\text{CDCl}_3$ )  $\delta$  147.8, 147.5, 147.4, 137.2, 135.5, 135.0, 132.2, 129.4, 124.0, 123.2, 121.9, 119.2, 117.8, 117.7, 114.6, 114.5, 109.7, 63.0, 39.6, 38.4, 38.3, 36.1, 34.4, 34.3, 32.8, 30.02, 29.99, 29.3, 27.7, 26.8, 26.7, 25.4, 16.2, 16.1, 16.0. HRMS (ESI $^+$ ) exact mass calcd for  $\text{C}_{37}\text{H}_{49}\text{N}_3\text{ONa}$  [ $\text{M}+\text{Na}$ ] $^+$  requires  $m/z$  574.3768, found  $m/z$  574.3764.

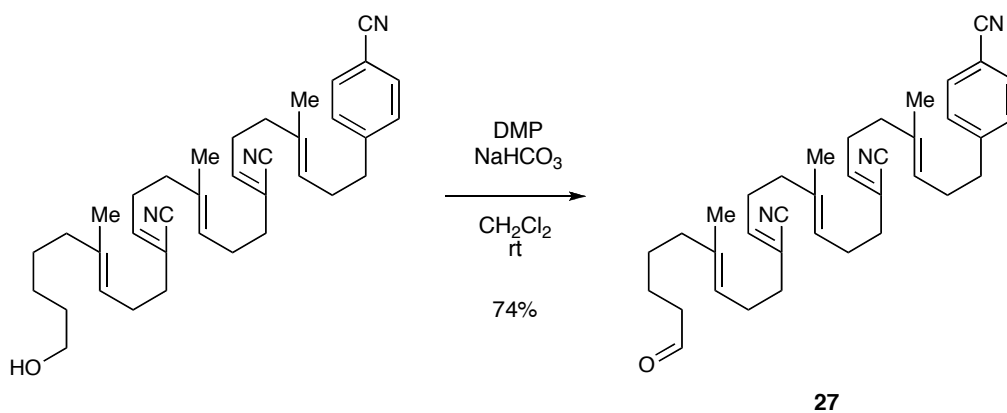

To a solution of the alcohol (660 mg, 1.23 mmol, 1.00 equiv) prepared in the previous step in  $\text{CH}_2\text{Cl}_2$  (12 mL) and solid  $\text{NaHCO}_3$  (517 mg, 6.15 mmol, 5.00 equiv) was added Dess-Martin periodinane (781 mg, 1.84 mmol, 1.50 equiv) and water (1 drop). The resultant mixture was

stirred for 20 min at room temperature. Addition of sat.  $\text{Na}_2\text{CO}_3$  (20 mL) and aqueous  $\text{Na}_2\text{S}_2\text{O}_3$  (5 mL) was followed by extraction with  $\text{CH}_2\text{Cl}_2$  ( $4 \times 10$  mL). The combined organic layers were washed with brine (10 mL), dried ( $\text{MgSO}_4$ ) and concentrated *in vacuo*. Purification of the crude material by flash chromatography (20% EtOAc/hexanes) furnished title compound **27** (485 mg, 74% yield, 88% *E,Z,E,Z,E*) as a colorless oil.

IR (ATR)  $\nu$  ( $\text{cm}^{-1}$ ) 2930, 2857, 2721, 1722, 1607, 1504, 1444, 1413, 1385, 1239, 1176, 1091, 1020, 826, 754, 666.  $^1\text{H}$  NMR (500 MHz,  $\text{CDCl}_3$ )  $\delta$  9.76 (s,  $\text{CHO}$ , 1H), 7.57 (d,  $J = 8.0$  Hz, ArH, 2H), 7.28 (d,  $J = 7.8$  Hz, ArH, 2H), 6.14-6.04 (m,  $2 \times \text{NCC}=\text{CH}_{\text{vin}}$ , 2H), 5.14 (t,  $J = 6.7$  Hz,  $\text{CH}_{\text{vin}}$ , 1H), 5.09 (br s,  $\text{CH}_{\text{vin}}$ , 1H), 5.05 (br s,  $\text{CH}_{\text{vin}}$ , 1H), 2.69 (t,  $J = 7.7$  Hz,  $\text{ArCH}_2$ , 2H), 2.48-2.37 (m,  $\text{CH}_2\text{CHO}$ ,  $2 \times \text{CH}_2\text{CH}_{\text{vin}}$ , 6H), 2.36-2.27 (m,  $\text{CH}_2\text{CH}_{\text{vin}}$ , 2H), 2.25-2.14 (m,  $4 \times \text{CH}_2$ , 8H), 2.12-2.03 (m,  $2 \times \text{CH}_2(\text{CH}_3)\text{C}=\text{C}$ , 4H), 1.98 (t,  $J = 7.5$  Hz,  $\text{CH}_2(\text{CH}_3)\text{C}=\text{C}$ , 2H), 1.63 (s,  $\text{CH}_3$ , 3H), 1.61-1.53 (m,  $\text{CH}_2\text{CH}_2\text{CHO}$ , 2H), 1.59 (s,  $\text{CH}_3$ , 3H), 1.52 (s,  $\text{CH}_3$ , 3H), 1.44-1.36 (m,  $\text{CH}_2(\text{CH}_2)_2\text{CHO}$ , 2H).  $^{13}\text{C}$  NMR (125 MHz,  $\text{CDCl}_3$ )  $\delta$  202.8, 147.8, 147.5, 147.4, 136.6, 135.4, 135.0, 132.1, 129.3, 123.9, 123.2, 122.3, 119.2, 117.74, 117.69, 114.6, 114.5, 109.6, 43.8, 39.3, 38.3 ( $2 \times \text{CH}_2$ ), 36.1, 34.4, 34.3, 29.99, 29.98, 29.3, 27.3, 26.8, 26.7, 21.6, 16.1, 16.00, 15.96. HRMS (ESI<sup>+</sup>) exact mass calcd for  $\text{C}_{37}\text{H}_{47}\text{N}_3\text{ONa}$   $[\text{M}+\text{Na}]^+$  requires  $m/z$  572.3611, found  $m/z$  572.3605.

## 5 X-ray Crystallographic Proof of Stereochemistry

The absolute configuration of tricyclic aldehyde **8** was determined after derivatization to incorporate a heavy atom. X-ray crystallographic analysis of derivative **68** secured absolute and relative stereochemistry based on anomalous dispersion (see Section 5.3.2 for the crystallographic report). The absolute stereochemistry of all other polycyclic aldehydes was assigned accordingly. Additionally, crystallographic analyses of suitable single crystals of tricyclic **8** and tetracyclic **13** secured the assigned product structures (see Section 5.3.1 & 5.3.3).

## 5.1 X-ray Crystallographic Proof of Aldehyde **8**

Single crystals of **8** suitable for X-ray crystallographic analysis were obtained by a single recrystallization at room temperature using hexanes/ $\text{CHCl}_3$  as a solvent by slow evaporation. X-ray crystallographic analysis was conducted at the X-ray diffraction facility of the Department of Chemistry at the University of Pennsylvania, Philadelphia/PA. See Section 5.3.1 for the crystallographic report.

## 5.2 Chemical Derivatization of Aldehyde **8**

### 5.2.1 Synthesis of 4-Bromobenzoate **68**

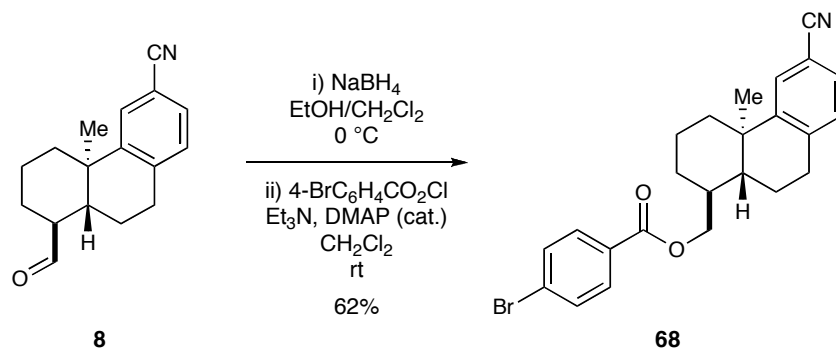

To a solution of the aldehyde **8** (68.2 mg, 0.267 mmol, 1.00 equiv) in  $\text{CH}_2\text{Cl}_2$  (3.0 mL) at  $0\text{ }^\circ\text{C}$  was added a solution of  $\text{NaBH}_4$  (50.6 mg, 1.34 mmol, 5.00 equiv) in  $\text{EtOH}$  (2.0 mL). The resultant mixture was allowed to warm to room temperature and stirred for 2 h. Careful addition of water (5 mL) and aq.  $\text{HCl}$  (10 mL) was followed by extraction with  $\text{CH}_2\text{Cl}_2$  ( $4 \times 5$  mL). The combined organic layers were washed with brine (10 mL), dried ( $\text{MgSO}_4$ ) and concentrated *in vacuo*. Purification of the crude material by flash chromatography (20%  $\text{EtOAc}/\text{hexanes}$ ) furnished the alcohol intermediate (62 mg, 90% yield) which was directly subjected to the following step.

To a solution of the alcohol intermediate (62 mg, 0.24 mmol, 1.00 equiv) in  $\text{CH}_2\text{Cl}_2$  (5.0 mL) and DMAP (2.9 mg, 0.024 mmol, 0.10 equiv) at room temperature was added  $\text{Et}_3\text{N}$  (50  $\mu\text{L}$ , 0.36 mmol, 1.50 equiv) followed by 4-bromobenzoyl chloride. The resultant solution was stirred for 2 h at room temperature. Addition of water (15 mL) was followed by extraction with  $\text{CH}_2\text{Cl}_2$  (4  $\times$  5 mL). The combined organic layers were washed with brine (10 mL), dried ( $\text{MgSO}_4$ ) and concentrated *in vacuo*. Purification of the crude material by flash chromatography (10% EtOAc/hexanes) furnished title the bromobenzoate **68** (73 mg, 69% yield).

Single crystals of **68** suitable for X-ray crystallographic analysis were obtained by a single recrystallization at room temperature using hexanes/ $\text{CHCl}_3$  as a solvent by slow evaporation. X-ray crystallographic analysis was conducted at the X-ray diffraction facility of the Department of Chemistry at University of Pennsylvania, Philadelphia/PA. See Section 5.3.2 for the crystallographic report.

IR (ATR)  $\nu$  ( $\text{cm}^{-1}$ ) 3069, 2921, 2856, 2222, 1922, 1714, 1591, 1485, 1462, 1440, 1429, 1398, 1378, 1361, 1332, 1272, 1239, 1172, 1135, 1119, 1103, 1069, 1012, 961, 942, 921, 884, 857, 845, 815, 753, 711, 681, 623.  $^1\text{H}$  NMR (500 MHz,  $\text{CDCl}_3$ )  $\delta$  7.89 (d,  $J = 8.3$  Hz, ArH, 2H), 7.60 (s, ArH, 1H), 7.59 (d,  $J = 8.6$  Hz, ArH, 2H), 7.38 (d,  $J = 7.5$  Hz, ArH, 1H), 7.15 (d,  $J = 7.7$  Hz, ArH, 1H), 4.44-4.36 (m,  $\text{OCH}_A\text{H}_B$ , 1H), 4.34-4.26 (m,  $\text{OCH}_A\text{H}_B$ , 1H), 3.00-2.81 (m, Ar $\text{CH}_2$ , 2H), 2.27 (d,  $J = 12.6$  Hz,  $\text{CH}_A\text{H}_B$ , 1H), 2.09-1.99 (m,  $\text{CH}_A\text{H}_B$ , 1H), 1.99-1.37 (m,  $2 \times \text{CH}_A\text{H}_B$ ,  $3 \times \text{CH}_A\text{H}_B$ ,  $2 \times \text{CH}$ , 7H), 1.36-1.22 (m,  $\text{CH}_A\text{H}_B$ , 1H), 1.14 (s,  $\text{CH}_3$ , 3H).  $^{13}\text{C}$  NMR (125 MHz,  $\text{CDCl}_3$ )  $\delta$  166.0, 149.0, 141.2, 131.9, 131.1, 130.0, 129.2, 128.9, 128.2 (2  $\times$ ), 119.7, 109.5, 68.1, 43.7, 37.6, 37.4, 36.6, 30.3, 29.4, 22.5, 21.4, 20.8. HRMS (ESI $^+$ ) exact mass calcd for  $\text{C}_{24}\text{H}_{25}\text{BrNO}_2$   $[\text{M}+\text{H}]^+$  requires  $m/z$  438.1063, found  $m/z$  438.1061.  $[\alpha]_D^{24} = -64.4$  ( $c = 0.82$ ,  $\text{CHCl}_3$ ).

## 5.3 X-ray Crystallographic Reports

### 5.3.1 Aldehyde **8**

#### X-ray Structure Determination of Compound **99119**

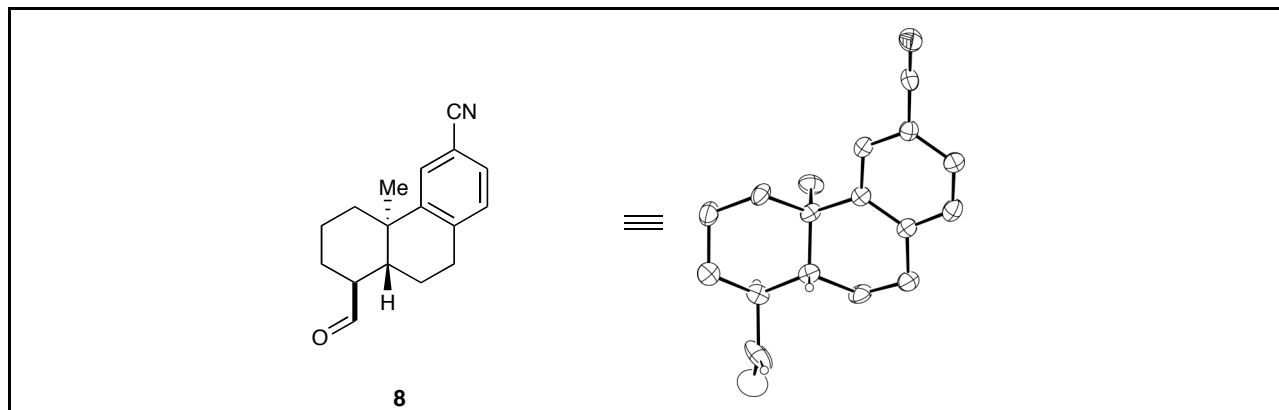

Compound **99119**,  $C_{17}H_{19}NO$ , crystallizes in the monoclinic space group  $P2_1$  (systematic absences  $0k0$ :  $k=\text{odd}$ ) with  $a=7.7406(6)\text{\AA}$ ,  $b=25.5147(18)\text{\AA}$ ,  $c=14.5225(11)\text{\AA}$ ,  $\beta=91.630(3)^\circ$ ,  $V=2867.0(4)\text{\AA}^3$ ,  $Z=8$ , and  $d_{\text{calc}}=1.174\text{ g/cm}^3$ . X-ray intensity data were collected on a Rigaku Mercury CCD area detector employing graphite-monochromated Mo- $K\alpha$  radiation ( $\lambda=0.71073\text{ \AA}$ ) at a temperature of  $143(1)\text{K}$ . Preliminary indexing was performed from a series of twelve  $0.5^\circ$  rotation images with exposures of 30 seconds. A total of 1060 rotation images were collected with a crystal to detector distance of 50 mm, a  $2\theta$  swing angle of  $-14^\circ$ , rotation widths of  $0.5^\circ$  and exposures of 30 seconds:

| scan no. | scan type | $\omega$ | $\chi$ | $\phi$        |
|----------|-----------|----------|--------|---------------|
| 1        | $\phi$    | 10.0     | 20.0   | 225.0 — 525.0 |
| 2        | $\phi$    | 0.0      | -60.0  | 110.0 — 140.0 |
| 3        | $\phi$    | 0.0      | -30.0  | 280.0 — 480.0 |

Rotation images were processed using CrystalClear<sup>21</sup>, producing a listing of unaveraged  $F^2$  and

(21) CrystalClear: Rigaku Corporation, 1999.



$\sigma(F^2)$  values which were then passed to the CrystalStructure<sup>22</sup> program package for further processing and structure solution on a Dell Pentium 4 computer. It became apparent during data collection that the crystal was twinned; there were a number of “double spots”. Two twin components were found by the twinsolve module of CrystalClear; the two components were related by a rotation of 180° about the 1 0 0 reciprocal direction. A total of 33406 reflections were measured over the ranges  $2.63 \leq \theta \leq 25.12^\circ$ ,  $-8 \leq h \leq 9$ ,  $-30 \leq k \leq 30$ ,  $-17 \leq l \leq 17$ . The intensity data were corrected for Lorentz and polarization effects and for absorption using REQAB<sup>23</sup> (minimum and maximum transmission 0.9224, 1.0000).

The structure was solved by direct methods (SIR97<sup>24</sup>). The asymmetric unit consists of four molecules. Refinement was by full-matrix least squares based on  $F^2$  using SHELXL-97.<sup>25</sup> All reflections were used during refinement. The weighting scheme used was  $w=1/[\sigma^2(F_o^2) + (0.0763P)^2 + 3.5526P]$  where  $P = (F_o^2 + 2F_c^2)/3$ . Non-hydrogen atoms were refined anisotropically and hydrogen atoms were refined using a riding model. Refinement converged to  $R1=0.0838$  and  $wR2=0.1914$  for 24705 observed reflections for which  $F > 4\sigma(F)$  and  $R1=0.1200$  and  $wR2=0.2158$  and  $GOF = 1.143$  for all 33406 unique, non-zero reflections and 692 variables.<sup>26</sup> The maximum  $\Delta/\sigma$  in the final cycle of least squares was 0.001 and the two most prominent peaks in the final difference Fourier were +0.345 and -0.341 e/Å<sup>3</sup>. The twinning parameter refined to a value of 0.3835(7).

Table 1. lists cell information, data collection parameters, and refinement data. Final positional and equivalent isotropic thermal parameters are given in Tables 2. and 3. Anisotropic thermal

(22) CrystalStructure: Crystal Structure Analysis Package, Rigaku Corp. Rigaku/MSK, 2002.

(23) REQAB4: Jacobsen R. A. **1994**, private communication.

(24) SIR97: Altomare, A.; Burla M.; Camalli, M.; Cascarano, G.; Giacovazzo, C.; Guagliardi, A.; Moliterni, A.; Polidori G.; Spagna, R. *J. Appl. Cryst.* **1999**, 32, 115.

(25) SHELXL-97: Sheldrick, G.M. *Acta Cryst.* **2008**, A64, 112.

(26)  $R1 = S||F_o| - |F_c|| / S |F_o|$

$$wR2 = [Sw(F_o^2 - F_c^2)^2 / Sw(F_o^2)^2]^{1/2}$$

$$GOF = [Sw(F_o^2 - F_c^2)^2 / (n - p)]^{1/2}$$

where n = the number of reflections and p = the number of parameters refined.

parameters are in Table 4. Tables 5. and 6. list bond distances and bond angles. Figure 1. is an ORTEP<sup>27</sup> representation of the molecule with 30% probability thermal ellipsoids displayed.

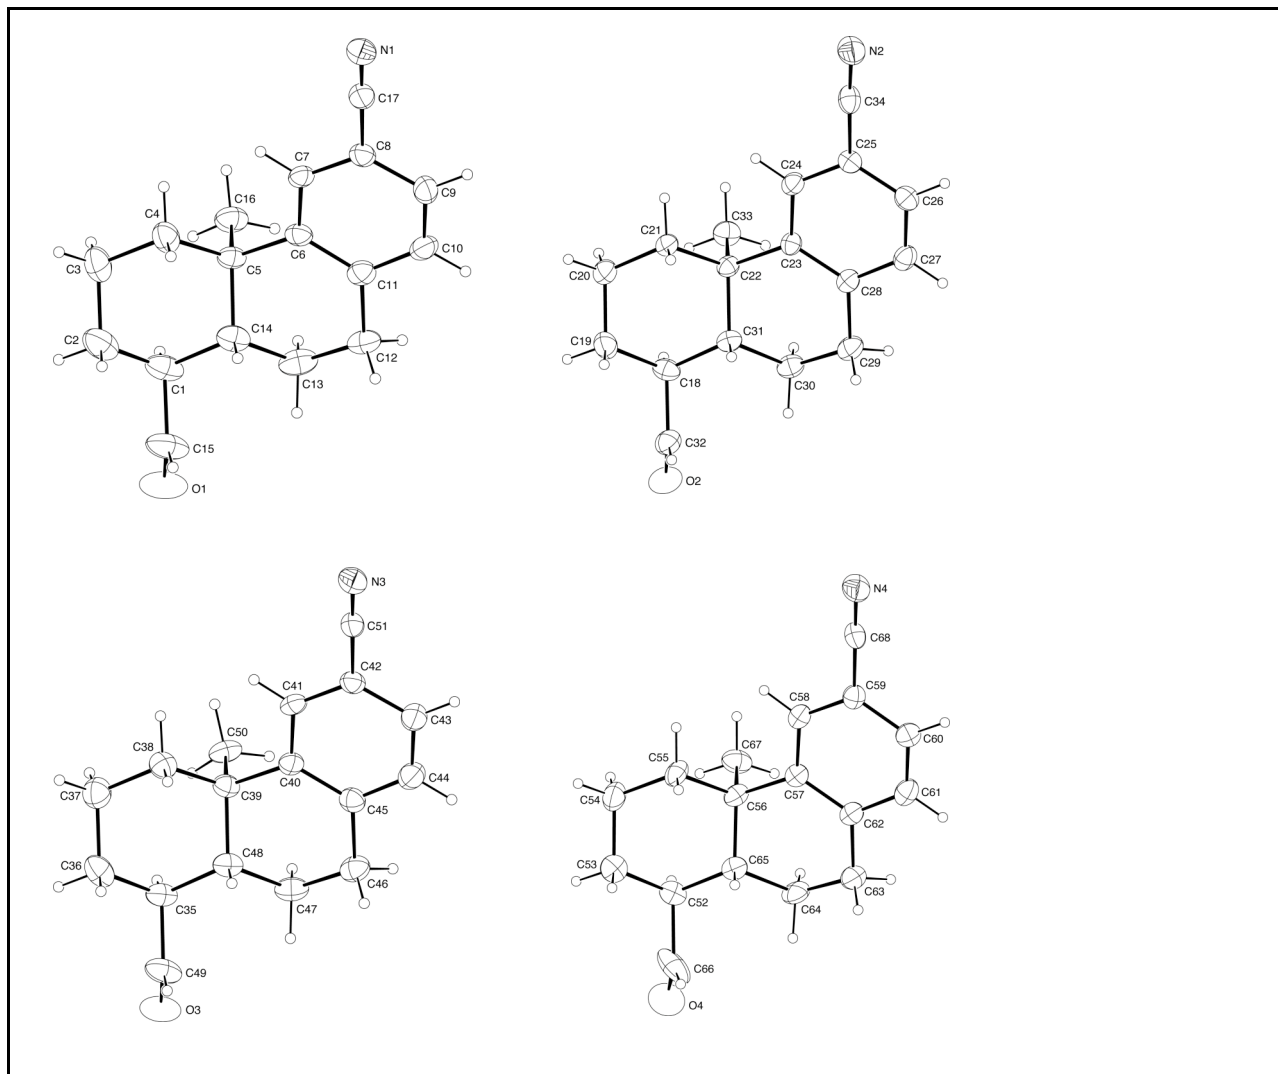

Figure 1. ORTEP drawing of the four molecules in the asymmetric unit with 30% probability thermal ellipsoids.

---

(27) "ORTEP-II: A Fortran Thermal Ellipsoid Plot Program for Crystal Structure Illustrations". Johnson, C. K. (1976) ORNL-5138.

**Table 1. Summary of Structure Determination of Compound 99119**

|                                   |                                             |
|-----------------------------------|---------------------------------------------|
| Empirical formula                 | C <sub>17</sub> H <sub>19</sub> NO          |
| Formula weight                    | 253.33                                      |
| Temperature                       | 143(1) K                                    |
| Wavelength                        | 0.71073 Å                                   |
| Crystal system                    | monoclinic                                  |
| Space group                       | P 2 <sub>1</sub>                            |
| Cell constants:                   |                                             |
| a                                 | 7.7406(6) Å                                 |
| b                                 | 25.5147(18) Å                               |
| c                                 | 14.5225(11) Å                               |
| β                                 | 91.630(3)°                                  |
| Volume                            | 2867.0(4) Å <sup>3</sup>                    |
| Z                                 | 8                                           |
| Density (calculated)              | 1.174 Mg/m <sup>3</sup>                     |
| Absorption coefficient            | 0.072 mm <sup>-1</sup>                      |
| F(000)                            | 1088                                        |
| Crystal size                      | 0.32 x 0.12 x 0.10 mm <sup>3</sup>          |
| Theta range for data collection   | 2.63 to 25.12°                              |
| Index ranges                      | -8 ≤ h ≤ 9, -30 ≤ k ≤ 30, -17 ≤ l ≤ 17      |
| Reflections collected             | 33406                                       |
| Independent reflections           | 33406 [R(int) = 0.0000]                     |
| Completeness to theta = 25.12°    | 92.5 %                                      |
| Absorption correction             | Semi-empirical from equivalents             |
| Max. and min. transmission        | 1.0000 and 0.9224                           |
| Refinement method                 | Full-matrix least-squares on F <sup>2</sup> |
| Data / restraints / parameters    | 33406 / 1 / 692                             |
| Goodness-of-fit on F <sup>2</sup> | 1.143                                       |
| Final R indices [I > 2σ(I)]       | R1 = 0.0838, wR2 = 0.1914                   |
| R indices (all data)              | R1 = 0.1200, wR2 = 0.2158                   |
| Extinction coefficient            | 0.0154(6)                                   |
| Largest diff. peak and hole       | 0.345 and -0.341 e.Å <sup>-3</sup>          |

Table 2. Refined Positional Parameters for Compound 99119

| Atom | x          | y           | z         | $U_{eq}, \text{\AA}^2$ |
|------|------------|-------------|-----------|------------------------|
| C1   | -0.1178(6) | 0.79483(18) | 0.7846(4) | 0.0632(14)             |
| C2   | -0.2852(6) | 0.7915(2)   | 0.8375(4) | 0.0752(16)             |
| C3   | -0.2528(5) | 0.7936(2)   | 0.9419(4) | 0.0680(15)             |
| C4   | -0.1244(5) | 0.75076(18) | 0.9726(4) | 0.0568(13)             |
| C5   | 0.0506(5)  | 0.75494(16) | 0.9230(3) | 0.0413(10)             |
| C6   | 0.1687(5)  | 0.70881(16) | 0.9496(3) | 0.0422(11)             |
| C7   | 0.1628(4)  | 0.68413(16) | 1.0357(3) | 0.0402(11)             |
| C8   | 0.2734(5)  | 0.64372(16) | 1.0604(3) | 0.0428(11)             |
| C9   | 0.4017(5)  | 0.62746(18) | 1.0009(4) | 0.0538(13)             |
| C10  | 0.4092(5)  | 0.65106(18) | 0.9157(3) | 0.0519(12)             |
| C11  | 0.2921(5)  | 0.69041(17) | 0.8872(3) | 0.0465(12)             |
| C12  | 0.2961(5)  | 0.70867(19) | 0.7882(3) | 0.0560(13)             |
| C13  | 0.1821(6)  | 0.75466(19) | 0.7648(3) | 0.0642(14)             |
| C14  | 0.0143(5)  | 0.75264(17) | 0.8176(3) | 0.0498(11)             |
| C15  | -0.1604(7) | 0.7860(2)   | 0.6834(4) | 0.0823(18)             |
| C16  | 0.1480(5)  | 0.80461(17) | 0.9526(3) | 0.0585(13)             |
| C17  | 0.2560(5)  | 0.61739(18) | 1.1487(4) | 0.0492(12)             |
| N1   | 0.2399(4)  | 0.59524(16) | 1.2165(3) | 0.0600(11)             |
| O1   | -0.1401(5) | 0.81662(15) | 0.6218(3) | 0.0956(13)             |
| C18  | 0.6550(4)  | 0.43702(17) | 0.8205(3) | 0.0454(11)             |
| C19  | 0.7256(5)  | 0.42929(18) | 0.9191(3) | 0.0536(12)             |
| C20  | 0.5822(5)  | 0.41838(18) | 0.9860(3) | 0.0537(12)             |
| C21  | 0.4388(4)  | 0.45906(16) | 0.9808(3) | 0.0440(11)             |
| C22  | 0.3605(4)  | 0.46453(14) | 0.8822(3) | 0.0354(10)             |
| C23  | 0.2263(4)  | 0.50886(15) | 0.8751(3) | 0.0350(10)             |
| C24  | 0.1185(4)  | 0.51863(15) | 0.9491(3) | 0.0404(10)             |
| C25  | -0.0073(4) | 0.55766(15) | 0.9438(3) | 0.0371(10)             |
| C26  | -0.0299(4) | 0.58806(17) | 0.8647(3) | 0.0450(11)             |
| C27  | 0.0775(5)  | 0.57867(16) | 0.7915(3) | 0.0448(11)             |
| C28  | 0.2046(4)  | 0.53989(15) | 0.7961(3) | 0.0380(10)             |
| C29  | 0.3216(5)  | 0.53448(17) | 0.7141(3) | 0.0493(11)             |
| C30  | 0.4386(5)  | 0.48665(17) | 0.7168(3) | 0.0473(11)             |
| C31  | 0.5069(4)  | 0.47736(16) | 0.8158(3) | 0.0393(10)             |
| C32  | 0.8001(5)  | 0.45493(19) | 0.7620(3) | 0.0517(12)             |
| C33  | 0.2639(5)  | 0.41347(16) | 0.8564(3) | 0.0498(12)             |
| C34  | -0.1149(5) | 0.56715(17) | 1.0229(3) | 0.0475(11)             |
| N2   | -0.2042(4) | 0.57517(16) | 1.0825(3) | 0.0644(11)             |
| O2   | 0.8596(4)  | 0.43253(13) | 0.6975(2) | 0.0716(10)             |
| C35  | 1.0678(5)  | 0.44747(17) | 0.2940(3) | 0.0498(12)             |
| C36  | 1.2380(5)  | 0.4536(2)   | 0.3507(4) | 0.0660(15)             |
| C37  | 1.2075(5)  | 0.4509(2)   | 0.4553(4) | 0.0642(14)             |
| C38  | 1.0724(5)  | 0.49112(17) | 0.4829(3) | 0.0499(12)             |
| C39  | 0.8989(5)  | 0.48572(16) | 0.4304(3) | 0.0424(11)             |
| C40  | 0.7745(5)  | 0.52954(16) | 0.4526(3) | 0.0408(10)             |
| C41  | 0.7779(5)  | 0.55373(16) | 0.5402(3) | 0.0432(11)             |
| C42  | 0.6617(5)  | 0.59230(16) | 0.5628(3) | 0.0417(11)             |
| C43  | 0.5305(5)  | 0.60797(18) | 0.5001(4) | 0.0533(13)             |
| C44  | 0.5271(5)  | 0.58424(18) | 0.4131(3) | 0.0547(13)             |
| C45  | 0.6476(5)  | 0.54722(17) | 0.3887(3) | 0.0441(11)             |
| C46  | 0.6441(5)  | 0.52952(19) | 0.2892(3) | 0.0536(12)             |

|                                                                                                                                                     |           |             |           |            |
|-----------------------------------------------------------------------------------------------------------------------------------------------------|-----------|-------------|-----------|------------|
| C47                                                                                                                                                 | 0.7608(5) | 0.48382(18) | 0.2679(3) | 0.0543(12) |
| C48                                                                                                                                                 | 0.9318(5) | 0.48817(17) | 0.3249(3) | 0.0472(11) |
| C49                                                                                                                                                 | 1.1091(6) | 0.45660(19) | 0.1948(4) | 0.0627(14) |
| C50                                                                                                                                                 | 0.8108(5) | 0.43385(16) | 0.4561(3) | 0.0534(12) |
| C51                                                                                                                                                 | 0.6778(5) | 0.61997(17) | 0.6511(4) | 0.0451(11) |
| N3                                                                                                                                                  | 0.6912(4) | 0.64265(16) | 0.7185(3) | 0.0596(11) |
| O3                                                                                                                                                  | 1.0882(4) | 0.42526(13) | 0.1334(3) | 0.0737(10) |
| C52                                                                                                                                                 | 0.2656(5) | 0.80128(17) | 0.3154(3) | 0.0476(12) |
| C53                                                                                                                                                 | 0.1946(5) | 0.80192(17) | 0.4135(3) | 0.0536(12) |
| C54                                                                                                                                                 | 0.3365(5) | 0.80998(19) | 0.4867(3) | 0.0604(13) |
| C55                                                                                                                                                 | 0.4831(5) | 0.76880(17) | 0.4777(3) | 0.0515(12) |
| C56                                                                                                                                                 | 0.5615(5) | 0.77015(15) | 0.3804(3) | 0.0427(11) |
| C57                                                                                                                                                 | 0.6970(5) | 0.72745(15) | 0.3713(3) | 0.0393(10) |
| C58                                                                                                                                                 | 0.8082(5) | 0.71495(16) | 0.4463(3) | 0.0430(11) |
| C59                                                                                                                                                 | 0.9341(5) | 0.67637(16) | 0.4399(3) | 0.0429(11) |
| C60                                                                                                                                                 | 0.9555(5) | 0.64948(16) | 0.3572(3) | 0.0453(11) |
| C61                                                                                                                                                 | 0.8495(5) | 0.66264(16) | 0.2822(3) | 0.0504(12) |
| C62                                                                                                                                                 | 0.7202(5) | 0.70090(16) | 0.2872(3) | 0.0409(11) |
| C63                                                                                                                                                 | 0.6070(5) | 0.71131(18) | 0.2031(3) | 0.0564(13) |
| C64                                                                                                                                                 | 0.4875(5) | 0.75784(19) | 0.2109(3) | 0.0549(12) |
| C65                                                                                                                                                 | 0.4141(5) | 0.76131(16) | 0.3082(3) | 0.0448(11) |
| C66                                                                                                                                                 | 0.1179(6) | 0.7827(3)   | 0.2484(4) | 0.090(2)   |
| C67                                                                                                                                                 | 0.6548(5) | 0.82288(16) | 0.3683(3) | 0.0560(13) |
| C68                                                                                                                                                 | 1.0462(5) | 0.66420(17) | 0.5194(4) | 0.0462(11) |
| N4                                                                                                                                                  | 1.1335(4) | 0.65455(16) | 0.5814(3) | 0.0626(11) |
| O4                                                                                                                                                  | 0.0540(5) | 0.80957(19) | 0.1948(3) | 0.1080(15) |
| $U_{eq} = 1/3[U_{11}(aa^*)^2 + U_{22}(bb^*)^2 + U_{33}(cc^*)^2 + 2U_{12}aa^*bb^*\cos\gamma + 2U_{13}aa^*cc^*\cos\beta + 2U_{23}bb^*cc^*\cos\alpha]$ |           |             |           |            |

**Table 3. Positional Parameters for Hydrogens in Compound 99119**

| Atom | x       | y      | z      | $U_{iso}, \text{\AA}^2$ |
|------|---------|--------|--------|-------------------------|
| H1   | -0.0668 | 0.8297 | 0.7930 | 0.084                   |
| H2a  | -0.3443 | 0.7591 | 0.8215 | 0.100                   |
| H2b  | -0.3601 | 0.8204 | 0.8190 | 0.100                   |
| H3a  | -0.3611 | 0.7887 | 0.9728 | 0.090                   |
| H3b  | -0.2070 | 0.8277 | 0.9591 | 0.090                   |
| H4a  | -0.1752 | 0.7167 | 0.9599 | 0.076                   |
| H4b  | -0.1032 | 0.7534 | 1.0386 | 0.076                   |
| H7   | 0.0818  | 0.6953 | 1.0775 | 0.053                   |
| H9   | 0.4800  | 0.6014 | 1.0183 | 0.072                   |
| H10  | 0.4944  | 0.6406 | 0.8758 | 0.069                   |
| H12a | 0.4142  | 0.7178 | 0.7744 | 0.074                   |
| H12b | 0.2624  | 0.6796 | 0.7486 | 0.074                   |
| H13a | 0.1553  | 0.7547 | 0.6991 | 0.085                   |
| H13b | 0.2432  | 0.7869 | 0.7798 | 0.085                   |
| H14  | -0.0387 | 0.7185 | 0.8045 | 0.066                   |
| H15  | -0.2071 | 0.7535 | 0.6673 | 0.109                   |
| H16a | 0.1598  | 0.8055 | 1.0186 | 0.088                   |
| H16b | 0.0848  | 0.8349 | 0.9314 | 0.088                   |
| H16c | 0.2605  | 0.8046 | 0.9265 | 0.088                   |
| H18  | 0.6117  | 0.4034 | 0.7969 | 0.060                   |
| H19a | 0.8063  | 0.4002 | 0.9204 | 0.071                   |
| H19b | 0.7879  | 0.4605 | 0.9387 | 0.071                   |
| H20a | 0.5334  | 0.3841 | 0.9728 | 0.071                   |
| H20b | 0.6312  | 0.4176 | 1.0482 | 0.071                   |
| H21a | 0.4846  | 0.4927 | 1.0009 | 0.058                   |
| H21b | 0.3485  | 0.4491 | 1.0223 | 0.058                   |
| H24  | 0.1312  | 0.4988 | 1.0026 | 0.054                   |
| H26  | -0.1146 | 0.6139 | 0.8609 | 0.060                   |
| H27  | 0.0645  | 0.5987 | 0.7382 | 0.060                   |
| H29a | 0.2500  | 0.5331 | 0.6583 | 0.066                   |
| H29b | 0.3932  | 0.5656 | 0.7107 | 0.066                   |
| H30a | 0.5347  | 0.4920 | 0.6765 | 0.063                   |
| H30b | 0.3745  | 0.4561 | 0.6953 | 0.063                   |
| H31  | 0.5569  | 0.5107 | 0.8368 | 0.052                   |
| H32  | 0.8497  | 0.4871 | 0.7774 | 0.069                   |
| H33a | 0.1765  | 0.4068 | 0.9005 | 0.075                   |
| H33b | 0.3443  | 0.3848 | 0.8564 | 0.075                   |
| H33c | 0.2108  | 0.4170 | 0.7961 | 0.075                   |
| H35  | 1.0224  | 0.4119 | 0.3016 | 0.066                   |
| H36a | 1.2905  | 0.4870 | 0.3362 | 0.088                   |
| H36b | 1.3175  | 0.4261 | 0.3339 | 0.088                   |
| H37a | 1.1686  | 0.4160 | 0.4713 | 0.085                   |
| H37b | 1.3153  | 0.4576 | 0.4889 | 0.085                   |
| H38a | 1.1178  | 0.5260 | 0.4725 | 0.066                   |
| H38b | 1.0530  | 0.4876 | 0.5483 | 0.066                   |
| H41  | 0.8611  | 0.5433 | 0.5839 | 0.057                   |
| H43  | 0.4492  | 0.6331 | 0.5156 | 0.071                   |
| H44  | 0.4410  | 0.5937 | 0.3704 | 0.073                   |
| H46a | 0.5264  | 0.5200 | 0.2716 | 0.071                   |
| H46b | 0.6765  | 0.5590 | 0.2511 | 0.071                   |

|      |        |        |        |       |
|------|--------|--------|--------|-------|
| H47a | 0.7849 | 0.4836 | 0.2028 | 0.072 |
| H47b | 0.7032 | 0.4512 | 0.2826 | 0.072 |
| H48  | 0.9797 | 0.5229 | 0.3125 | 0.063 |
| H49  | 1.1546 | 0.4891 | 0.1796 | 0.083 |
| H50a | 0.8140 | 0.4299 | 0.5219 | 0.080 |
| H50b | 0.8706 | 0.4051 | 0.4286 | 0.080 |
| H50c | 0.6928 | 0.4342 | 0.4338 | 0.080 |
| H52  | 0.3050 | 0.8363 | 0.2981 | 0.063 |
| H53a | 0.1102 | 0.8298 | 0.4179 | 0.071 |
| H53b | 0.1362 | 0.7690 | 0.4248 | 0.071 |
| H54a | 0.2877 | 0.8072 | 0.5473 | 0.080 |
| H54b | 0.3845 | 0.8449 | 0.4807 | 0.080 |
| H55a | 0.4373 | 0.7341 | 0.4892 | 0.069 |
| H55b | 0.5733 | 0.7758 | 0.5238 | 0.069 |
| H58  | 0.7973 | 0.7329 | 0.5015 | 0.057 |
| H60  | 1.0388 | 0.6234 | 0.3525 | 0.060 |
| H61  | 0.8646 | 0.6454 | 0.2266 | 0.067 |
| H63a | 0.5377 | 0.6803 | 0.1902 | 0.075 |
| H63b | 0.6804 | 0.7168 | 0.1509 | 0.075 |
| H64a | 0.3931 | 0.7546 | 0.1659 | 0.073 |
| H64b | 0.5502 | 0.7897 | 0.1977 | 0.073 |
| H65  | 0.3646 | 0.7269 | 0.3213 | 0.060 |
| H66  | 0.0801 | 0.7482 | 0.2522 | 0.120 |
| H67a | 0.7429 | 0.8267 | 0.4157 | 0.084 |
| H67b | 0.5731 | 0.8510 | 0.3726 | 0.084 |
| H67c | 0.7067 | 0.8238 | 0.3091 | 0.084 |

**Table 4. Refined Thermal Parameters (U's) for Compound 99119**

| Atom | U <sub>11</sub> | U <sub>22</sub> | U <sub>33</sub> | U <sub>23</sub> | U <sub>13</sub> | U <sub>12</sub> |
|------|-----------------|-----------------|-----------------|-----------------|-----------------|-----------------|
| C1   | 0.097(4)        | 0.036(3)        | 0.055(4)        | 0.000(3)        | -0.028(3)       | -0.009(3)       |
| C2   | 0.080(4)        | 0.066(4)        | 0.077(5)        | -0.004(3)       | -0.031(3)       | 0.000(3)        |
| C3   | 0.058(3)        | 0.061(3)        | 0.085(5)        | 0.003(3)        | -0.006(3)       | 0.016(2)        |
| C4   | 0.054(3)        | 0.051(3)        | 0.064(4)        | 0.000(3)        | -0.006(2)       | 0.008(2)        |
| C5   | 0.053(2)        | 0.035(3)        | 0.035(3)        | -0.006(2)       | -0.0077(19)     | -0.005(2)       |
| C6   | 0.043(2)        | 0.049(3)        | 0.034(3)        | -0.004(2)       | -0.0050(19)     | -0.010(2)       |
| C7   | 0.042(2)        | 0.043(3)        | 0.035(3)        | -0.012(2)       | -0.0020(19)     | -0.004(2)       |
| C8   | 0.047(2)        | 0.041(3)        | 0.039(3)        | -0.007(2)       | -0.008(2)       | 0.004(2)        |
| C9   | 0.041(2)        | 0.059(3)        | 0.061(4)        | -0.018(3)       | -0.008(2)       | 0.009(2)        |
| C10  | 0.057(3)        | 0.060(3)        | 0.039(3)        | -0.011(3)       | 0.005(2)        | -0.001(2)       |
| C11  | 0.049(3)        | 0.045(3)        | 0.045(3)        | -0.010(2)       | -0.002(2)       | -0.009(2)       |
| C12  | 0.069(3)        | 0.064(4)        | 0.035(3)        | -0.003(3)       | 0.004(2)        | -0.011(2)       |
| C13  | 0.096(4)        | 0.054(3)        | 0.043(3)        | -0.003(3)       | 0.004(3)        | -0.021(3)       |
| C14  | 0.069(3)        | 0.031(2)        | 0.048(3)        | -0.001(2)       | -0.012(2)       | -0.011(2)       |
| C15  | 0.136(5)        | 0.050(3)        | 0.059(5)        | -0.009(3)       | -0.041(4)       | 0.010(3)        |
| C16  | 0.081(3)        | 0.046(3)        | 0.048(3)        | -0.008(3)       | -0.009(2)       | -0.004(2)       |
| C17  | 0.049(3)        | 0.050(3)        | 0.048(4)        | -0.010(3)       | -0.008(2)       | 0.008(2)        |
| N1   | 0.066(2)        | 0.067(3)        | 0.047(3)        | 0.008(2)        | -0.004(2)       | 0.009(2)        |
| O1   | 0.169(4)        | 0.064(3)        | 0.052(3)        | 0.005(2)        | -0.030(2)       | -0.002(2)       |
| C18  | 0.040(2)        | 0.053(3)        | 0.043(3)        | -0.009(2)       | 0.009(2)        | -0.001(2)       |
| C19  | 0.045(2)        | 0.049(3)        | 0.066(4)        | 0.005(3)        | -0.003(2)       | 0.004(2)        |
| C20  | 0.054(3)        | 0.067(3)        | 0.041(3)        | 0.009(3)        | 0.007(2)        | 0.010(2)        |
| C21  | 0.046(2)        | 0.047(3)        | 0.040(3)        | 0.009(2)        | 0.0083(19)      | 0.007(2)        |
| C22  | 0.042(2)        | 0.033(2)        | 0.032(3)        | 0.000(2)        | 0.0051(18)      | 0.0012(19)      |
| C23  | 0.040(2)        | 0.034(2)        | 0.031(3)        | -0.001(2)       | -0.0006(18)     | 0.0013(18)      |
| C24  | 0.045(2)        | 0.044(3)        | 0.033(3)        | 0.002(2)        | -0.0011(19)     | -0.002(2)       |
| C25  | 0.039(2)        | 0.040(3)        | 0.032(3)        | -0.009(2)       | 0.0010(18)      | 0.0005(19)      |
| C26  | 0.039(2)        | 0.045(3)        | 0.051(3)        | -0.003(2)       | -0.002(2)       | -0.0022(19)     |
| C27  | 0.050(2)        | 0.040(3)        | 0.044(3)        | 0.007(2)        | -0.004(2)       | -0.008(2)       |
| C28  | 0.044(2)        | 0.036(3)        | 0.034(3)        | -0.001(2)       | -0.0020(19)     | -0.0052(19)     |
| C29  | 0.056(3)        | 0.054(3)        | 0.038(3)        | 0.002(2)        | 0.001(2)        | -0.005(2)       |
| C30  | 0.056(2)        | 0.052(3)        | 0.034(3)        | -0.003(2)       | 0.007(2)        | -0.004(2)       |
| C31  | 0.045(2)        | 0.037(3)        | 0.036(3)        | -0.004(2)       | 0.0035(18)      | -0.0064(19)     |
| C32  | 0.058(3)        | 0.058(3)        | 0.039(3)        | 0.003(3)        | 0.002(2)        | 0.000(2)        |
| C33  | 0.052(2)        | 0.044(3)        | 0.053(3)        | -0.003(2)       | 0.005(2)        | -0.005(2)       |
| C34  | 0.051(3)        | 0.049(3)        | 0.042(3)        | -0.004(2)       | -0.010(2)       | 0.009(2)        |
| N2   | 0.064(2)        | 0.082(3)        | 0.047(3)        | -0.007(2)       | 0.006(2)        | 0.018(2)        |
| O2   | 0.085(2)        | 0.075(2)        | 0.056(3)        | -0.001(2)       | 0.0221(19)      | 0.0005(18)      |
| C35  | 0.074(3)        | 0.041(3)        | 0.035(3)        | 0.000(2)        | 0.014(2)        | -0.002(2)       |
| C36  | 0.062(3)        | 0.061(3)        | 0.077(4)        | -0.006(3)       | 0.018(3)        | 0.007(2)        |
| C37  | 0.064(3)        | 0.066(4)        | 0.063(4)        | -0.003(3)       | -0.001(2)       | 0.009(2)        |
| C38  | 0.054(3)        | 0.047(3)        | 0.048(3)        | -0.009(2)       | 0.002(2)        | 0.001(2)        |
| C39  | 0.050(2)        | 0.038(3)        | 0.039(3)        | -0.002(2)       | 0.007(2)        | -0.001(2)       |
| C40  | 0.042(2)        | 0.041(3)        | 0.040(3)        | 0.010(2)        | 0.006(2)        | -0.0048(19)     |
| C41  | 0.051(2)        | 0.048(3)        | 0.031(3)        | 0.012(2)        | 0.0009(19)      | -0.001(2)       |
| C42  | 0.045(2)        | 0.043(3)        | 0.037(3)        | 0.004(2)        | 0.007(2)        | 0.003(2)        |
| C43  | 0.047(3)        | 0.057(3)        | 0.055(4)        | 0.007(3)        | 0.001(2)        | 0.003(2)        |
| C44  | 0.051(3)        | 0.066(3)        | 0.047(4)        | 0.009(3)        | -0.004(2)       | -0.003(2)       |
| C45  | 0.041(2)        | 0.049(3)        | 0.043(3)        | -0.002(2)       | 0.004(2)        | -0.007(2)       |
| C46  | 0.055(3)        | 0.062(3)        | 0.044(3)        | 0.001(3)        | -0.005(2)       | -0.011(2)       |



|                                                                                                         |          |          |          |           |             |             |
|---------------------------------------------------------------------------------------------------------|----------|----------|----------|-----------|-------------|-------------|
| C47                                                                                                     | 0.074(3) | 0.052(3) | 0.037(3) | -0.004(2) | 0.003(2)    | -0.014(2)   |
| C48                                                                                                     | 0.065(3) | 0.037(3) | 0.041(3) | -0.001(2) | 0.010(2)    | -0.004(2)   |
| C49                                                                                                     | 0.093(4) | 0.041(3) | 0.055(4) | -0.001(3) | 0.028(3)    | -0.004(3)   |
| C50                                                                                                     | 0.081(3) | 0.045(3) | 0.034(3) | 0.005(2)  | 0.001(2)    | -0.007(2)   |
| C51                                                                                                     | 0.042(2) | 0.049(3) | 0.045(3) | 0.004(3)  | 0.004(2)    | 0.008(2)    |
| N3                                                                                                      | 0.065(2) | 0.067(3) | 0.048(3) | -0.009(2) | 0.007(2)    | 0.008(2)    |
| O3                                                                                                      | 0.122(3) | 0.051(2) | 0.050(3) | -0.011(2) | 0.025(2)    | -0.0060(19) |
| C52                                                                                                     | 0.044(2) | 0.042(3) | 0.056(3) | 0.009(2)  | -0.006(2)   | -0.003(2)   |
| C53                                                                                                     | 0.059(3) | 0.042(3) | 0.060(4) | 0.006(2)  | 0.001(2)    | 0.001(2)    |
| C54                                                                                                     | 0.069(3) | 0.061(3) | 0.052(4) | -0.008(3) | 0.005(2)    | 0.019(2)    |
| C55                                                                                                     | 0.071(3) | 0.050(3) | 0.033(3) | -0.003(2) | -0.003(2)   | 0.017(2)    |
| C56                                                                                                     | 0.054(2) | 0.039(3) | 0.035(3) | -0.001(2) | -0.0029(19) | 0.000(2)    |
| C57                                                                                                     | 0.045(2) | 0.036(2) | 0.037(3) | 0.003(2)  | 0.0035(19)  | -0.0054(19) |
| C58                                                                                                     | 0.050(2) | 0.039(3) | 0.041(3) | -0.004(2) | 0.004(2)    | 0.000(2)    |
| C59                                                                                                     | 0.046(2) | 0.039(3) | 0.043(3) | -0.001(2) | 0.005(2)    | -0.002(2)   |
| C60                                                                                                     | 0.050(2) | 0.040(3) | 0.046(3) | 0.000(2)  | -0.001(2)   | -0.0028(19) |
| C61                                                                                                     | 0.059(3) | 0.048(3) | 0.045(3) | -0.005(2) | 0.013(2)    | -0.007(2)   |
| C62                                                                                                     | 0.047(2) | 0.039(3) | 0.036(3) | 0.002(2)  | 0.0035(19)  | -0.012(2)   |
| C63                                                                                                     | 0.053(3) | 0.072(3) | 0.044(3) | -0.009(3) | 0.001(2)    | -0.006(2)   |
| C64                                                                                                     | 0.061(3) | 0.074(3) | 0.029(3) | 0.003(3)  | -0.006(2)   | -0.003(2)   |
| C65                                                                                                     | 0.052(2) | 0.041(3) | 0.041(3) | 0.002(2)  | 0.0006(19)  | -0.007(2)   |
| C66                                                                                                     | 0.047(3) | 0.120(5) | 0.102(6) | 0.056(4)  | 0.007(3)    | 0.033(3)    |
| C67                                                                                                     | 0.053(3) | 0.045(3) | 0.069(4) | 0.003(3)  | -0.015(2)   | 0.001(2)    |
| C68                                                                                                     | 0.041(3) | 0.048(3) | 0.051(4) | 0.001(2)  | 0.008(2)    | 0.008(2)    |
| N4                                                                                                      | 0.063(2) | 0.071(3) | 0.053(3) | 0.007(2)  | -0.006(2)   | 0.018(2)    |
| O4                                                                                                      | 0.089(3) | 0.144(4) | 0.091(4) | 0.003(3)  | -0.009(2)   | 0.011(3)    |
| The form of the anisotropic displacement parameter is:                                                  |          |          |          |           |             |             |
| $\exp[-2\pi^2(a^*U_{11}h^2+b^*U_{22}k^2+c^*U_{33}l^2+2b^*c^*U_{23}kl+2a^*c^*U_{13}hl+2a^*b^*U_{12}hk)]$ |          |          |          |           |             |             |

**Table 5. Bond Distances in Compound 99119, Å**

|         |          |         |          |         |          |
|---------|----------|---------|----------|---------|----------|
| C1-C15  | 1.514(7) | C1-C2   | 1.527(7) | C1-C14  | 1.551(6) |
| C2-C3   | 1.530(7) | C3-C4   | 1.535(6) | C4-C5   | 1.556(6) |
| C5-C16  | 1.530(5) | C5-C6   | 1.533(6) | C5-C14  | 1.549(6) |
| C6-C7   | 1.401(6) | C6-C11  | 1.415(6) | C7-C8   | 1.382(5) |
| C8-C9   | 1.398(6) | C8-C17  | 1.457(7) | C9-C10  | 1.378(6) |
| C10-C11 | 1.407(6) | C11-C12 | 1.512(6) | C12-C13 | 1.502(6) |
| C13-C14 | 1.529(6) | C15-O1  | 1.202(6) | C17-N1  | 1.146(6) |
| C18-C32 | 1.499(5) | C18-C19 | 1.531(6) | C18-C31 | 1.541(5) |
| C19-C20 | 1.521(5) | C20-C21 | 1.520(5) | C21-C22 | 1.546(5) |
| C22-C23 | 1.537(5) | C22-C33 | 1.543(5) | C22-C31 | 1.543(5) |
| C23-C28 | 1.400(5) | C23-C24 | 1.402(5) | C24-C25 | 1.394(5) |
| C25-C26 | 1.394(6) | C25-C34 | 1.458(6) | C26-C27 | 1.389(5) |
| C27-C28 | 1.396(5) | C28-C29 | 1.523(5) | C29-C30 | 1.519(6) |
| C30-C31 | 1.536(5) | C32-O2  | 1.200(5) | C34-N2  | 1.141(5) |
| C35-C49 | 1.503(6) | C35-C36 | 1.541(6) | C35-C48 | 1.554(6) |
| C36-C37 | 1.544(6) | C37-C38 | 1.528(6) | C38-C39 | 1.531(5) |
| C39-C40 | 1.516(5) | C39-C50 | 1.540(6) | C39-C48 | 1.562(6) |
| C40-C45 | 1.406(6) | C40-C41 | 1.414(6) | C41-C42 | 1.379(5) |
| C42-C43 | 1.403(5) | C42-C51 | 1.465(7) | C43-C44 | 1.400(6) |
| C44-C45 | 1.380(6) | C45-C46 | 1.514(6) | C46-C47 | 1.512(6) |
| C47-C48 | 1.545(5) | C49-O3  | 1.206(5) | C51-N3  | 1.139(5) |
| C52-C53 | 1.542(6) | C52-C65 | 1.543(6) | C52-C66 | 1.554(7) |
| C53-C54 | 1.522(6) | C54-C55 | 1.554(5) | C55-C56 | 1.555(6) |
| C56-C57 | 1.521(5) | C56-C67 | 1.539(5) | C56-C65 | 1.544(5) |
| C57-C58 | 1.406(5) | C57-C62 | 1.412(5) | C58-C59 | 1.390(5) |
| C59-C60 | 1.397(6) | C59-C68 | 1.458(6) | C60-C61 | 1.386(6) |
| C61-C62 | 1.401(5) | C62-C63 | 1.507(6) | C63-C64 | 1.511(6) |
| C64-C65 | 1.540(6) | C66-O4  | 1.140(6) | C68-N4  | 1.138(5) |

Table 6. Bond Angles in Compound 99119, °

|             |          |             |          |             |          |
|-------------|----------|-------------|----------|-------------|----------|
| C15-C1-C2   | 108.4(4) | C15-C1-C14  | 108.7(4) | C2-C1-C14   | 111.6(4) |
| C1-C2-C3    | 112.2(4) | C2-C3-C4    | 110.5(4) | C3-C4-C5    | 112.5(4) |
| C16-C5-C6   | 106.2(3) | C16-C5-C14  | 112.6(4) | C6-C5-C14   | 108.1(3) |
| C16-C5-C4   | 110.8(4) | C6-C5-C4    | 110.6(3) | C14-C5-C4   | 108.6(3) |
| C7-C6-C11   | 117.5(4) | C7-C6-C5    | 122.4(4) | C11-C6-C5   | 120.1(4) |
| C8-C7-C6    | 122.1(4) | C7-C8-C9    | 120.4(4) | C7-C8-C17   | 120.0(4) |
| C9-C8-C17   | 119.5(4) | C10-C9-C8   | 118.3(4) | C9-C10-C11  | 122.2(4) |
| C10-C11-C6  | 119.3(4) | C10-C11-C12 | 118.0(4) | C6-C11-C12  | 122.6(4) |
| C13-C12-C11 | 115.4(4) | C12-C13-C14 | 111.2(4) | C13-C14-C5  | 111.2(3) |
| C13-C14-C1  | 112.6(4) | C5-C14-C1   | 112.2(4) | O1-C15-C1   | 126.6(5) |
| N1-C17-C8   | 177.7(5) | C32-C18-C19 | 108.4(3) | C32-C18-C31 | 109.9(4) |
| C19-C18-C31 | 111.9(3) | C20-C19-C18 | 111.9(3) | C21-C20-C19 | 112.9(4) |
| C20-C21-C22 | 112.0(3) | C23-C22-C33 | 106.4(3) | C23-C22-C31 | 108.0(3) |
| C33-C22-C31 | 112.8(3) | C23-C22-C21 | 112.0(3) | C33-C22-C21 | 108.9(3) |
| C31-C22-C21 | 108.8(3) | C28-C23-C24 | 117.9(3) | C28-C23-C22 | 122.4(3) |
| C24-C23-C22 | 119.7(4) | C25-C24-C23 | 121.0(4) | C24-C25-C26 | 121.0(4) |
| C24-C25-C34 | 119.3(4) | C26-C25-C34 | 119.7(4) | C27-C26-C25 | 118.1(4) |
| C26-C27-C28 | 121.5(4) | C27-C28-C23 | 120.5(4) | C27-C28-C29 | 117.4(4) |
| C23-C28-C29 | 122.0(3) | C30-C29-C28 | 114.8(4) | C29-C30-C31 | 109.7(3) |
| C30-C31-C18 | 112.4(3) | C30-C31-C22 | 112.2(3) | C18-C31-C22 | 112.9(3) |
| O2-C32-C18  | 127.4(4) | N2-C34-C25  | 177.4(5) | C49-C35-C36 | 107.1(4) |
| C49-C35-C48 | 109.7(4) | C36-C35-C48 | 110.7(4) | C35-C36-C37 | 111.6(4) |
| C38-C37-C36 | 110.6(4) | C37-C38-C39 | 114.0(4) | C40-C39-C38 | 112.4(3) |
| C40-C39-C50 | 107.1(3) | C38-C39-C50 | 110.2(3) | C40-C39-C48 | 107.5(3) |
| C38-C39-C48 | 108.6(3) | C50-C39-C48 | 111.0(4) | C45-C40-C41 | 116.7(4) |
| C45-C40-C39 | 122.2(4) | C41-C40-C39 | 121.2(4) | C42-C41-C40 | 122.0(4) |
| C41-C42-C43 | 120.9(4) | C41-C42-C51 | 120.8(4) | C43-C42-C51 | 118.2(4) |
| C44-C43-C42 | 117.2(4) | C45-C44-C43 | 122.1(4) | C44-C45-C40 | 121.0(4) |
| C44-C45-C46 | 117.1(4) | C40-C45-C46 | 121.8(4) | C47-C46-C45 | 115.5(4) |
| C46-C47-C48 | 110.1(4) | C47-C48-C35 | 112.0(4) | C47-C48-C39 | 111.1(3) |
| C35-C48-C39 | 112.8(3) | O3-C49-C35  | 125.4(5) | N3-C51-C42  | 178.2(5) |
| C53-C52-C65 | 110.8(3) | C53-C52-C66 | 107.8(3) | C65-C52-C66 | 107.0(4) |
| C54-C53-C52 | 112.2(3) | C53-C54-C55 | 111.4(4) | C54-C55-C56 | 111.5(3) |
| C57-C56-C67 | 106.8(3) | C57-C56-C65 | 109.5(3) | C67-C56-C65 | 113.0(3) |
| C57-C56-C55 | 110.6(3) | C67-C56-C55 | 108.6(4) | C65-C56-C55 | 108.3(3) |
| C58-C57-C62 | 118.1(4) | C58-C57-C56 | 120.2(4) | C62-C57-C56 | 121.6(4) |
| C59-C58-C57 | 121.6(4) | C58-C59-C60 | 120.4(4) | C58-C59-C68 | 120.0(4) |
| C60-C59-C68 | 119.6(4) | C61-C60-C59 | 118.3(4) | C60-C61-C62 | 122.4(4) |
| C61-C62-C57 | 119.2(4) | C61-C62-C63 | 118.7(4) | C57-C62-C63 | 122.1(4) |
| C62-C63-C64 | 114.9(4) | C63-C64-C65 | 110.9(4) | C64-C65-C52 | 113.3(4) |
| C64-C65-C56 | 110.3(3) | C52-C65-C56 | 113.3(4) | O4-C66-C52  | 122.7(6) |
| N4-C68-C59  | 179.8(5) |             |          |             |          |

5.3.2 4-Bromobenzoate **68**X-ray Structure Determination of Compound **99118**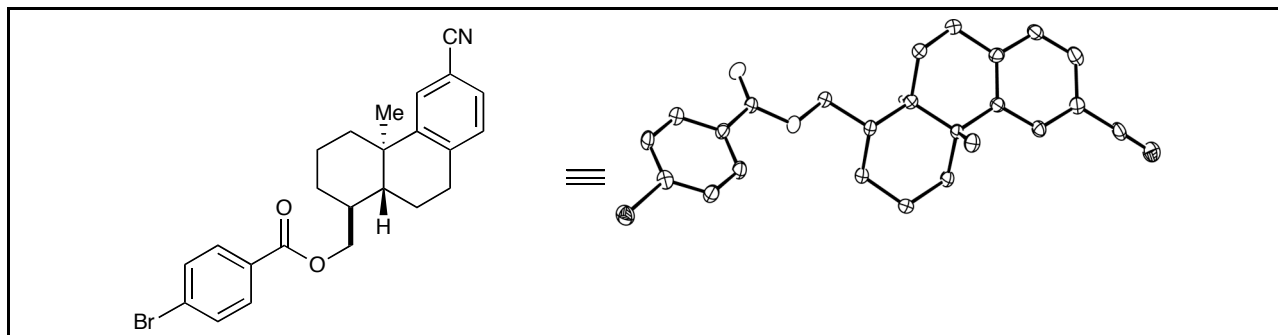

Compound 99118,  $C_{24}H_{24}NO_2Br$ , crystallizes in the triclinic space group P1 with  $a=8.5337(9)\text{\AA}$ ,  $b=10.3702(6)\text{\AA}$ ,  $c=13.3899(12)\text{\AA}$ ,  $\alpha=69.135(8)^\circ$ ,  $\beta=82.489(10)^\circ$ ,  $\gamma=67.433(8)^\circ$ ,  $V=1022.44(15)\text{\AA}^3$ ,  $Z=2$ , and  $d_{\text{calc}}=1.424\text{ g/cm}^3$ . X-ray intensity data were collected on a Rigaku Mercury CCD area detector employing graphite-monochromated Mo- $K\alpha$  radiation ( $\lambda=0.71073\text{ \AA}$ ) at a temperature of  $143(1)\text{K}$ . Preliminary indexing was performed from a series of twelve  $0.5^\circ$  rotation images with exposures of 30 seconds. A total of 1060 rotation images were collected with a crystal to detector distance of 35 mm, a  $2\theta$  swing angle of  $-12^\circ$ , rotation widths of  $0.5^\circ$  and exposures of 30 seconds:

| scan no. | scan type | $\omega$      | $\chi$ | $\phi$        |
|----------|-----------|---------------|--------|---------------|
| 1        | $\phi$    | 10.0          | 20.0   | 157.5 — 367.5 |
| 2        | $\omega$  | -20.0 — +20.0 | -90.0  | 225.0         |
| 3        | $\omega$  | -20.0 — +20.0 | -90.0  | 0.0           |
| 4        | $\omega$  | -20.0 — +20.0 | -90.0  | 135.0         |
| 5        | $\omega$  | -20.0 — +20.0 | -90.0  | 45.0          |
| 6        | $\omega$  | -20.0 — +20.0 | -90.0  | 90.0          |
| 7        | $\omega$  | -20.0 — +20.0 | -90.0  | 180.0         |
| 8        | $\omega$  | -20.0 — +20.0 | -90.0  | 270.0         |
| 9        | $\omega$  | -20.0 — +20.0 | -90.0  | 315.0         |

Rotation images were processed using CrystalClear<sup>28</sup>, producing a listing of unaveraged  $F^2$  and

(28) CrystalClear: Rigaku Corporation, 1999.

$\sigma(F^2)$  values which were then passed to the CrystalStructure<sup>29</sup> program package for further processing and structure solution on a Dell Pentium 4 computer. A total of 13602 reflections were measured over the ranges  $2.58 \leq \theta \leq 25.00^\circ$ ,  $-10 \leq h \leq 10$ ,  $-12 \leq k \leq 12$ ,  $-14 \leq l \leq 15$  yielding 5922 unique reflections ( $R_{int} = 0.0275$ ). The intensity data were corrected for Lorentz and polarization effects and for absorption using REQAB<sup>30</sup> (minimum and maximum transmission 0.7944, 1.0000). The structure was solved by direct methods (SIR97<sup>31</sup>). The asymmetric unit consists of two molecules of the title compound. Refinement was by full-matrix least squares based on  $F^2$  using SHELXL-97.<sup>32</sup> All reflections were used during refinement. The weighting scheme used was  $w=1/[\sigma^2(F_o^2) + (0.0552P)^2 + 0.0833P]$  where  $P = (F_o^2 + 2F_c^2)/3$ . Non-hydrogen atoms were refined anisotropically and hydrogen atoms were refined using a riding model. Refinement converged to  $R1=0.0408$  and  $wR2=0.0986$  for 5465 observed reflections for which  $F > 4\sigma(F)$  and  $R1=0.0441$  and  $wR2=0.1036$  and  $GOF = 1.096$  for all 5922 unique, non-zero reflections and 509 variables.<sup>33</sup> The maximum  $\Delta/\sigma$  in the final cycle of least squares was 4.439 and the two most prominent peaks in the final difference Fourier were +0.451 and -0.658  $e/\text{\AA}^3$ . The Flack absolute structure parameter refined to a value of 0.000(9), thus corroborating the assigned stereochemistry.

Table 1. lists cell information, data collection parameters, and refinement data. Final positional and equivalent isotropic thermal parameters are given in Tables 2. and 3. Anisotropic thermal parameters are in Table 4. Tables 5. and 6. list bond distances and bond angles. Figures 1. and 2. are ORTEP<sup>34</sup> representations of the molecule with 30% probability thermal ellipsoids displayed.

(29) CrystalStructure: Crystal Structure Analysis Package, Rigaku Corp. Rigaku/MSK, 2002.

(30) REQAB4: Jacobsen, R. A., 1994, private communication.

(31) SIR97: Altomare, A.; Burla, M.; Camalli, M.; Casciarano, G.; Giacovazzo, C.; Guagliardi, A.; Moliterni, A.; Polidori, G.; Spagna R. *J. Appl. Cryst.* **1999**, *32*, 115.

(32) SHELXL-97: Sheldrick, G.M. *Acta Cryst.* **2008**, *A64*, 112.

(33)  $R1 = \sum ||F_o| - |F_c|| / \sum |F_o|$   
 $wR2 = [\sum w(F_o^2 - F_c^2)^2 / \sum w(F_o^2)^2]^{1/2}$   
 $GOF = [\sum w(F_o^2 - F_c^2)^2 / (n - p)]^{1/2}$

where  $n$  = the number of reflections and  $p$  = the number of parameters refined.

(34) "ORTEP-II: A Fortran Thermal Ellipsoid Plot Program for Crystal Structure Illustrations". Johnson, C. K. (1976) ORNL-5138.

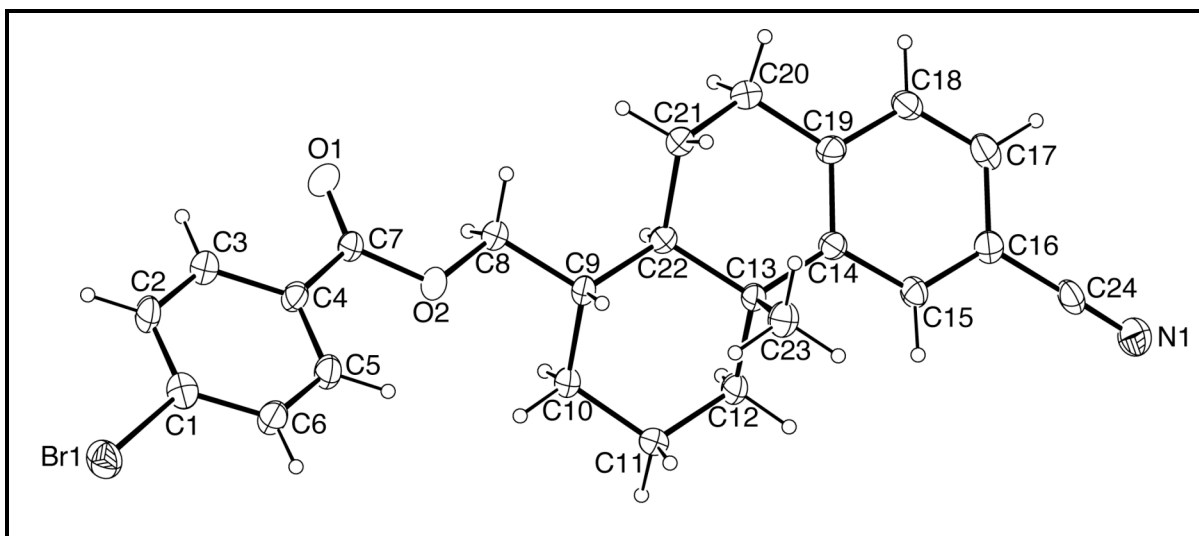

Figure 1. ORTEP drawing of molecule no. 1 of the asymmetric unit with 30% probability thermal ellipsoids.

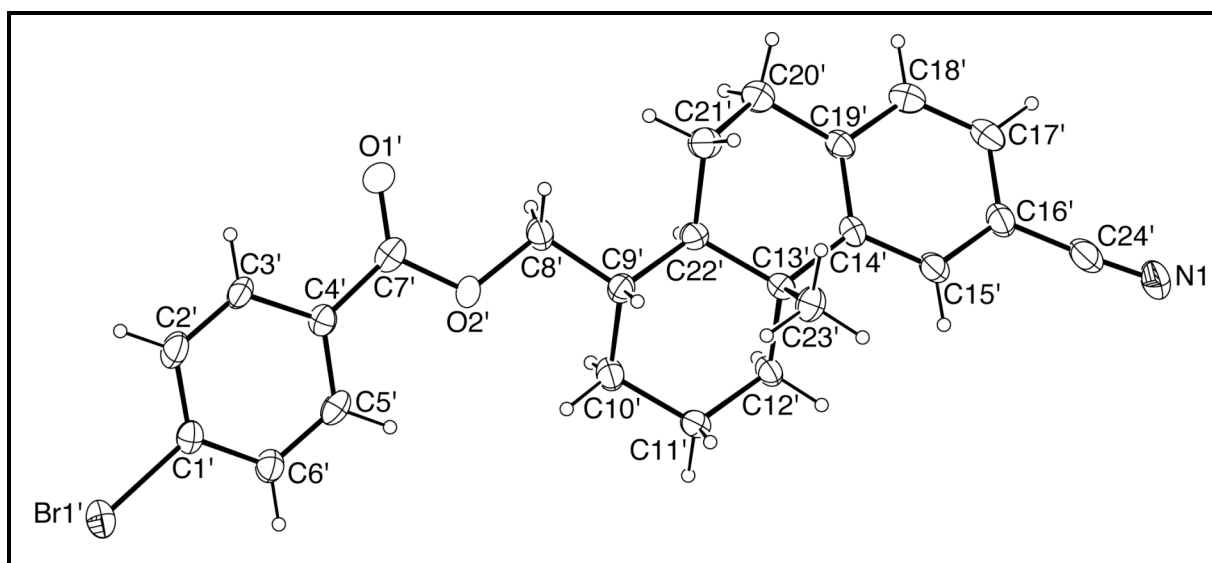

Figure 2. ORTEP drawing of molecule no. 2 of the asymmetric unit with 30% probability thermal ellipsoids.

**Table 1. Summary of Structure Determination of Compound 99118**

|                                   |                                                    |
|-----------------------------------|----------------------------------------------------|
| Empirical formula                 | C <sub>24</sub> H <sub>24</sub> NO <sub>2</sub> Br |
| Formula weight                    | 438.35                                             |
| Temperature                       | 143(1) K                                           |
| Wavelength                        | 0.71073 Å                                          |
| Crystal system                    | triclinic                                          |
| Space group                       | P1                                                 |
| Cell constants:                   |                                                    |
| a                                 | 8.5337(9) Å                                        |
| b                                 | 10.3702(6) Å                                       |
| c                                 | 13.3899(12) Å                                      |
| α                                 | 69.135(8)°                                         |
| β                                 | 82.489(10)°                                        |
| γ                                 | 67.433(8)°                                         |
| Volume                            | 1022.44(15) Å <sup>3</sup>                         |
| Z                                 | 2                                                  |
| Density (calculated)              | 1.424 Mg/m <sup>3</sup>                            |
| Absorption coefficient            | 2.030 mm <sup>-1</sup>                             |
| F(000)                            | 452                                                |
| Crystal size                      | 0.28 x 0.15 x 0.12 mm <sup>3</sup>                 |
| Theta range for data collection   | 2.58 to 25.00°                                     |
| Index ranges                      | -10 ≤ h ≤ 10, -12 ≤ k ≤ 12, -14 ≤ l ≤ 15           |
| Reflections collected             | 13602                                              |
| Independent reflections           | 5922 [R(int) = 0.0275]                             |
| Completeness to theta = 25.00°    | 99.6 %                                             |
| Absorption correction             | Semi-empirical from equivalents                    |
| Max. and min. transmission        | 1.0000 and 0.7944                                  |
| Refinement method                 | Full-matrix least-squares on F <sup>2</sup>        |
| Data / restraints / parameters    | 5922 / 3 / 509                                     |
| Goodness-of-fit on F <sup>2</sup> | 1.096                                              |
| Final R indices [I > 2σ(I)]       | R1 = 0.0408, wR2 = 0.0986                          |
| R indices (all data)              | R1 = 0.0441, wR2 = 0.1036                          |
| Absolute structure parameter      | 0.000(9)                                           |
| Largest diff. peak and hole       | 0.451 and -0.658 e.Å <sup>-3</sup>                 |

Table 2. Refined Positional Parameters for Compound 99118

| Atom | x          | y          | z          | $U_{eq}, \text{\AA}^2$ |
|------|------------|------------|------------|------------------------|
| C1   | 0.1669(7)  | 1.2157(7)  | 0.4766(4)  | 0.0396(14)             |
| C2   | 0.0215(7)  | 1.2331(7)  | 0.5399(5)  | 0.0430(14)             |
| C3   | -0.0077(7) | 1.1084(7)  | 0.6071(5)  | 0.0415(13)             |
| C4   | 0.1060(6)  | 0.9667(7)  | 0.6127(5)  | 0.0342(13)             |
| C5   | 0.2474(7)  | 0.9535(6)  | 0.5465(5)  | 0.0385(13)             |
| C6   | 0.2762(7)  | 1.0767(7)  | 0.4782(5)  | 0.0414(14)             |
| C7   | 0.0713(6)  | 0.8376(6)  | 0.6898(5)  | 0.0342(12)             |
| C8   | 0.1648(6)  | 0.5774(7)  | 0.7590(5)  | 0.0424(14)             |
| C9   | 0.3198(6)  | 0.4468(6)  | 0.7484(4)  | 0.0308(12)             |
| C10  | 0.4749(5)  | 0.4406(5)  | 0.7980(4)  | 0.0358(10)             |
| C11  | 0.6362(5)  | 0.3118(5)  | 0.7904(4)  | 0.0385(10)             |
| C12  | 0.6083(6)  | 0.1652(6)  | 0.8329(4)  | 0.0343(12)             |
| C13  | 0.4551(6)  | 0.1695(6)  | 0.7791(4)  | 0.0289(11)             |
| C14  | 0.4293(6)  | 0.0228(6)  | 0.8252(4)  | 0.0302(11)             |
| C15  | 0.5683(6)  | -0.1098(6) | 0.8380(4)  | 0.0340(11)             |
| C16  | 0.5494(6)  | -0.2459(6) | 0.8774(4)  | 0.0354(11)             |
| C17  | 0.3870(7)  | -0.2533(7) | 0.9019(4)  | 0.0420(13)             |
| C18  | 0.2500(6)  | -0.1241(7) | 0.8877(5)  | 0.0355(12)             |
| C19  | 0.2674(6)  | 0.0120(6)  | 0.8513(4)  | 0.0344(12)             |
| C20  | 0.1120(6)  | 0.1495(6)  | 0.8397(5)  | 0.0471(14)             |
| C21  | 0.1340(5)  | 0.2917(5)  | 0.7670(4)  | 0.0391(10)             |
| C22  | 0.2959(6)  | 0.2977(6)  | 0.7976(4)  | 0.0330(12)             |
| C23  | 0.4937(7)  | 0.1940(7)  | 0.6591(4)  | 0.0392(13)             |
| C24  | 0.6959(6)  | -0.3831(5) | 0.8954(4)  | 0.0394(11)             |
| N1   | 0.8118(6)  | -0.4905(5) | 0.9123(4)  | 0.0542(11)             |
| O1   | -0.0520(5) | 0.8468(5)  | 0.7461(4)  | 0.0502(11)             |
| O2   | 0.1939(4)  | 0.7088(4)  | 0.6914(3)  | 0.0400(9)              |
| Br1  | 0.21570(5) | 1.38402(4) | 0.39049(4) | 0.05183(17)            |
| C1'  | 0.8109(7)  | -0.2135(7) | 0.5083(5)  | 0.0371(13)             |
| C2'  | 0.9432(7)  | -0.2281(7) | 0.4357(5)  | 0.0484(16)             |
| C3'  | 0.9713(7)  | -0.1047(7) | 0.3699(5)  | 0.0426(14)             |
| C4'  | 0.8696(7)  | 0.0363(7)  | 0.3742(5)  | 0.0350(13)             |
| C5'  | 0.7389(7)  | 0.0470(7)  | 0.4480(5)  | 0.0423(14)             |
| C6'  | 0.7103(7)  | -0.0769(7) | 0.5159(5)  | 0.0420(14)             |
| C7'  | 0.9098(7)  | 0.1656(7)  | 0.3031(5)  | 0.0386(14)             |
| C8'  | 0.8189(7)  | 0.4304(6)  | 0.2451(5)  | 0.0402(13)             |
| C9'  | 0.6589(6)  | 0.5600(6)  | 0.2509(4)  | 0.0354(13)             |
| C10' | 0.5834(6)  | 0.5374(5)  | 0.3640(4)  | 0.0426(11)             |
| C11' | 0.4272(6)  | 0.6751(5)  | 0.3655(4)  | 0.0438(12)             |
| C12' | 0.4629(7)  | 0.8172(6)  | 0.3224(4)  | 0.0365(12)             |
| C13' | 0.5346(6)  | 0.8408(6)  | 0.2077(4)  | 0.0329(12)             |
| C14' | 0.5818(7)  | 0.9813(6)  | 0.1698(4)  | 0.0340(12)             |
| C15' | 0.4582(7)  | 1.1169(6)  | 0.1712(4)  | 0.0435(14)             |
| C16' | 0.4925(7)  | 1.2458(6)  | 0.1343(4)  | 0.0453(14)             |
| C17' | 0.6528(7)  | 1.2434(7)  | 0.0962(4)  | 0.0471(14)             |
| C18' | 0.7756(8)  | 1.1102(9)  | 0.0933(5)  | 0.0450(14)             |
| C19' | 0.7410(7)  | 0.9796(6)  | 0.1273(4)  | 0.0368(12)             |
| C20' | 0.8767(7)  | 0.8434(7)  | 0.1105(5)  | 0.0557(16)             |
| C21' | 0.8038(6)  | 0.7301(6)  | 0.1127(4)  | 0.0480(12)             |
| C22' | 0.6992(6)  | 0.7023(6)  | 0.2126(4)  | 0.0349(12)             |



|                                                                                                                                                     |            |             |            |             |
|-----------------------------------------------------------------------------------------------------------------------------------------------------|------------|-------------|------------|-------------|
| C23'                                                                                                                                                | 0.4021(7)  | 0.8669(6)   | 0.1287(4)  | 0.0424(13)  |
| C24'                                                                                                                                                | 0.3621(8)  | 1.3871(7)   | 0.1297(4)  | 0.0612(16)  |
| N1'                                                                                                                                                 | 0.2618(8)  | 1.5021(6)   | 0.1210(5)  | 0.093(2)    |
| O1'                                                                                                                                                 | 1.0376(5)  | 0.1592(5)   | 0.2510(3)  | 0.0486(11)  |
| O2'                                                                                                                                                 | 0.7868(4)  | 0.2940(4)   | 0.3050(3)  | 0.0382(9)   |
| Br1'                                                                                                                                                | 0.76426(5) | -0.38251(4) | 0.59919(3) | 0.05068(17) |
| $U_{eq} = 1/3[U_{11}(aa^*)^2 + U_{22}(bb^*)^2 + U_{33}(cc^*)^2 + 2U_{12}aa^*bb^*\cos\gamma + 2U_{13}aa^*cc^*\cos\beta + 2U_{23}bb^*cc^*\cos\alpha]$ |            |             |            |             |

**Table 3. Positional Parameters for Hydrogens in Compound 99118**

| Atom  | x       | y       | z      | $U_{iso}, \text{\AA}^2$ |
|-------|---------|---------|--------|-------------------------|
| H2    | -0.0543 | 1.3271  | 0.5367 | 0.057                   |
| H3    | -0.1044 | 1.1189  | 0.6493 | 0.055                   |
| H5    | 0.3233  | 0.8599  | 0.5488 | 0.051                   |
| H6    | 0.3694  | 1.0665  | 0.4330 | 0.055                   |
| H8a   | 0.0631  | 0.5742  | 0.7365 | 0.056                   |
| H8b   | 0.1511  | 0.5750  | 0.8326 | 0.056                   |
| H9    | 0.3417  | 0.4634  | 0.6720 | 0.041                   |
| H10a  | 0.4523  | 0.4316  | 0.8726 | 0.048                   |
| H10b  | 0.4935  | 0.5329  | 0.7621 | 0.048                   |
| H11a  | 0.6716  | 0.3301  | 0.7164 | 0.051                   |
| H11b  | 0.7263  | 0.3058  | 0.8311 | 0.051                   |
| H12a  | 0.5897  | 0.1401  | 0.9093 | 0.046                   |
| H12b  | 0.7100  | 0.0880  | 0.8210 | 0.046                   |
| H15   | 0.6759  | -0.1064 | 0.8197 | 0.045                   |
| H17   | 0.3731  | -0.3442 | 0.9273 | 0.056                   |
| H18   | 0.1422  | -0.1282 | 0.9031 | 0.047                   |
| H20a  | 0.0792  | 0.1578  | 0.9099 | 0.063                   |
| H20b  | 0.0199  | 0.1387  | 0.8120 | 0.063                   |
| H21a  | 0.0373  | 0.3764  | 0.7739 | 0.052                   |
| H21b  | 0.1401  | 0.2955  | 0.6932 | 0.052                   |
| H22   | 0.2900  | 0.2776  | 0.8750 | 0.044                   |
| H23a  | 0.5935  | 0.1138  | 0.6514 | 0.059                   |
| H23b  | 0.5123  | 0.2857  | 0.6265 | 0.059                   |
| H23c  | 0.3993  | 0.1978  | 0.6247 | 0.059                   |
| H2'   | 1.0116  | -0.3210 | 0.4322 | 0.064                   |
| H3'   | 1.0596  | -0.1140 | 0.3210 | 0.057                   |
| H5'   | 0.6693  | 0.1397  | 0.4514 | 0.056                   |
| H6'   | 0.6243  | -0.0687 | 0.5662 | 0.056                   |
| H8'1  | 0.8451  | 0.4361  | 0.1713 | 0.053                   |
| H8'2  | 0.9143  | 0.4321  | 0.2761 | 0.053                   |
| H9'   | 0.5737  | 0.5718  | 0.2025 | 0.047                   |
| H10a' | 0.5509  | 0.4513  | 0.3865 | 0.057                   |
| H10b' | 0.6682  | 0.5197  | 0.4139 | 0.057                   |
| H11a' | 0.3373  | 0.6839  | 0.3231 | 0.058                   |
| H11b' | 0.3870  | 0.6617  | 0.4383 | 0.058                   |
| H12a' | 0.5440  | 0.8134  | 0.3688 | 0.049                   |
| H12b' | 0.3589  | 0.9003  | 0.3220 | 0.049                   |
| H15'  | 0.3509  | 1.1201  | 0.1976 | 0.058                   |
| H17'  | 0.6772  | 1.3294  | 0.0731 | 0.063                   |
| H18'  | 0.8833  | 1.1075  | 0.0681 | 0.060                   |
| H20a' | 0.9625  | 0.7989  | 0.1661 | 0.074                   |
| H20b' | 0.9311  | 0.8723  | 0.0423 | 0.074                   |
| H21a' | 0.7333  | 0.7670  | 0.0499 | 0.064                   |
| H21b' | 0.8949  | 0.6386  | 0.1124 | 0.064                   |
| H22'  | 0.7684  | 0.6921  | 0.2699 | 0.046                   |
| H23a' | 0.3738  | 0.7801  | 0.1474 | 0.064                   |
| H23b' | 0.4476  | 0.8871  | 0.0577 | 0.064                   |
| H23c' | 0.3020  | 0.9499  | 0.1314 | 0.064                   |

Table 4. Refined Thermal Parameters (U's) for Compound 99118

| Atom | U <sub>11</sub> | U <sub>22</sub> | U <sub>33</sub> | U <sub>23</sub> | U <sub>13</sub> | U <sub>12</sub> |
|------|-----------------|-----------------|-----------------|-----------------|-----------------|-----------------|
| C1   | 0.048(3)        | 0.035(4)        | 0.034(3)        | -0.009(3)       | -0.007(3)       | -0.013(3)       |
| C2   | 0.043(3)        | 0.023(3)        | 0.057(3)        | -0.015(3)       | -0.005(3)       | -0.003(2)       |
| C3   | 0.039(3)        | 0.034(3)        | 0.052(3)        | -0.019(3)       | 0.001(2)        | -0.009(2)       |
| C4   | 0.027(2)        | 0.030(3)        | 0.044(3)        | -0.016(3)       | -0.007(2)       | -0.002(2)       |
| C5   | 0.039(3)        | 0.027(3)        | 0.045(3)        | -0.013(3)       | -0.002(3)       | -0.006(3)       |
| C6   | 0.036(3)        | 0.037(4)        | 0.048(3)        | -0.019(3)       | 0.001(3)        | -0.007(3)       |
| C7   | 0.030(3)        | 0.023(3)        | 0.047(3)        | -0.012(3)       | -0.004(2)       | -0.005(2)       |
| C8   | 0.029(2)        | 0.030(3)        | 0.069(4)        | -0.022(3)       | 0.000(3)        | -0.007(2)       |
| C9   | 0.029(2)        | 0.025(3)        | 0.038(3)        | -0.015(3)       | 0.000(2)        | -0.006(2)       |
| C10  | 0.031(2)        | 0.027(2)        | 0.050(3)        | -0.016(2)       | -0.0020(19)     | -0.0071(18)     |
| C11  | 0.029(2)        | 0.033(2)        | 0.056(3)        | -0.017(2)       | 0.001(2)        | -0.0132(19)     |
| C12  | 0.032(2)        | 0.024(3)        | 0.042(3)        | -0.010(2)       | -0.005(2)       | -0.005(2)       |
| C13  | 0.026(2)        | 0.023(3)        | 0.037(3)        | -0.012(2)       | -0.004(2)       | -0.006(2)       |
| C14  | 0.030(2)        | 0.034(3)        | 0.031(2)        | -0.015(2)       | 0.005(2)        | -0.013(2)       |
| C15  | 0.038(2)        | 0.024(2)        | 0.038(2)        | -0.008(2)       | 0.004(2)        | -0.014(2)       |
| C16  | 0.040(2)        | 0.032(3)        | 0.034(2)        | -0.012(2)       | 0.003(2)        | -0.014(2)       |
| C17  | 0.057(3)        | 0.041(3)        | 0.041(3)        | -0.020(3)       | 0.009(3)        | -0.028(3)       |
| C18  | 0.038(3)        | 0.042(3)        | 0.037(2)        | -0.019(2)       | 0.007(2)        | -0.022(3)       |
| C19  | 0.028(2)        | 0.040(3)        | 0.040(3)        | -0.020(2)       | -0.001(2)       | -0.011(2)       |
| C20  | 0.031(2)        | 0.042(3)        | 0.074(4)        | -0.026(3)       | 0.008(3)        | -0.015(2)       |
| C21  | 0.029(2)        | 0.036(3)        | 0.056(3)        | -0.022(2)       | -0.002(2)       | -0.0082(18)     |
| C22  | 0.026(2)        | 0.028(3)        | 0.044(3)        | -0.013(2)       | -0.004(2)       | -0.006(2)       |
| C23  | 0.045(3)        | 0.034(3)        | 0.034(3)        | -0.011(3)       | 0.001(2)        | -0.011(2)       |
| C24  | 0.051(3)        | 0.028(3)        | 0.046(3)        | -0.013(2)       | 0.005(2)        | -0.022(2)       |
| N1   | 0.055(3)        | 0.035(3)        | 0.068(3)        | -0.011(2)       | 0.003(2)        | -0.017(2)       |
| O1   | 0.0331(19)      | 0.036(3)        | 0.075(3)        | -0.021(2)       | 0.011(2)        | -0.0074(18)     |
| O2   | 0.0350(18)      | 0.024(2)        | 0.056(2)        | -0.015(2)       | 0.0005(18)      | -0.0048(16)     |
| Br1  | 0.0560(3)       | 0.0376(4)       | 0.0567(3)       | -0.0069(3)      | -0.0074(3)      | -0.0173(3)      |
| C1'  | 0.036(3)        | 0.030(3)        | 0.045(3)        | -0.014(3)       | -0.006(2)       | -0.009(3)       |
| C2'  | 0.043(3)        | 0.033(4)        | 0.067(4)        | -0.024(3)       | 0.000(3)        | -0.005(3)       |
| C3'  | 0.033(3)        | 0.030(3)        | 0.059(3)        | -0.019(3)       | 0.004(3)        | -0.003(2)       |
| C4'  | 0.035(3)        | 0.033(3)        | 0.040(3)        | -0.016(3)       | -0.003(2)       | -0.011(2)       |
| C5'  | 0.039(3)        | 0.040(4)        | 0.047(3)        | -0.026(3)       | -0.001(3)       | -0.003(3)       |
| C6'  | 0.043(3)        | 0.034(4)        | 0.046(3)        | -0.015(3)       | 0.000(3)        | -0.010(3)       |
| C7'  | 0.033(3)        | 0.042(4)        | 0.048(3)        | -0.026(3)       | -0.007(3)       | -0.009(3)       |
| C8'  | 0.040(3)        | 0.030(3)        | 0.048(3)        | -0.007(3)       | -0.005(2)       | -0.014(2)       |
| C9'  | 0.031(2)        | 0.031(3)        | 0.046(3)        | -0.014(3)       | 0.000(2)        | -0.012(2)       |
| C10' | 0.046(2)        | 0.032(3)        | 0.045(3)        | -0.008(2)       | -0.002(2)       | -0.014(2)       |
| C11' | 0.047(3)        | 0.036(3)        | 0.047(3)        | -0.013(2)       | 0.015(2)        | -0.020(2)       |
| C12' | 0.048(3)        | 0.028(3)        | 0.034(3)        | -0.009(2)       | 0.005(2)        | -0.018(2)       |
| C13' | 0.036(3)        | 0.032(3)        | 0.028(3)        | -0.006(2)       | 0.003(2)        | -0.014(2)       |
| C14' | 0.042(3)        | 0.028(3)        | 0.032(2)        | -0.007(2)       | -0.002(2)       | -0.015(2)       |
| C15' | 0.055(3)        | 0.035(3)        | 0.037(3)        | -0.008(2)       | 0.010(2)        | -0.020(2)       |
| C16' | 0.062(3)        | 0.032(3)        | 0.040(3)        | -0.010(2)       | 0.005(3)        | -0.019(3)       |
| C17' | 0.065(3)        | 0.047(4)        | 0.035(3)        | -0.009(3)       | 0.008(3)        | -0.034(3)       |
| C18' | 0.048(3)        | 0.054(4)        | 0.041(3)        | -0.017(3)       | 0.006(2)        | -0.029(3)       |
| C19' | 0.043(3)        | 0.035(3)        | 0.038(3)        | -0.011(2)       | 0.003(2)        | -0.021(2)       |
| C20' | 0.047(3)        | 0.044(3)        | 0.074(4)        | -0.016(3)       | 0.013(3)        | -0.022(3)       |
| C21' | 0.047(3)        | 0.047(3)        | 0.053(3)        | -0.020(3)       | 0.011(2)        | -0.021(2)       |
| C22' | 0.036(3)        | 0.034(3)        | 0.035(3)        | -0.013(2)       | 0.004(2)        | -0.013(2)       |

|                                                                                                         |            |           |           |             |            |             |
|---------------------------------------------------------------------------------------------------------|------------|-----------|-----------|-------------|------------|-------------|
| C23'                                                                                                    | 0.042(3)   | 0.039(3)  | 0.046(3)  | -0.018(3)   | -0.006(2)  | -0.009(2)   |
| C24'                                                                                                    | 0.083(4)   | 0.045(4)  | 0.050(3)  | -0.007(3)   | 0.020(3)   | -0.031(3)   |
| N1'                                                                                                     | 0.109(5)   | 0.032(3)  | 0.104(5)  | -0.010(3)   | 0.047(4)   | -0.018(3)   |
| O1'                                                                                                     | 0.037(2)   | 0.044(3)  | 0.060(3)  | -0.018(2)   | 0.0087(19) | -0.0120(19) |
| O2'                                                                                                     | 0.0346(18) | 0.025(2)  | 0.050(2)  | -0.0125(19) | 0.0000(17) | -0.0061(16) |
| Br1'                                                                                                    | 0.0597(3)  | 0.0350(3) | 0.0520(3) | -0.0094(3)  | -0.0046(3) | -0.0148(3)  |
| The form of the anisotropic displacement parameter is:                                                  |            |           |           |             |            |             |
| $\exp[-2\pi^2(a^*U_{11}h^2+b^*U_{22}k^2+c^*U_{33}l^2+2b^*c^*U_{23}kl+2a^*c^*U_{13}hl+2a^*b^*U_{12}hk)]$ |            |           |           |             |            |             |

**Table 5. Bond Distances in Compound 99118, Å**

|           |          |           |          |           |           |
|-----------|----------|-----------|----------|-----------|-----------|
| C1-C6     | 1.378(8) | C1-C2     | 1.398(7) | C1-Br1    | 1.884(6)  |
| C2-C3     | 1.380(9) | C3-C4     | 1.397(8) | C4-C5     | 1.393(7)  |
| C4-C7     | 1.479(8) | C5-C6     | 1.371(9) | C7-O1     | 1.205(6)  |
| C7-O2     | 1.339(6) | C8-O2     | 1.436(7) | C8-C9     | 1.522(7)  |
| C9-C10    | 1.527(7) | C9-C22    | 1.532(7) | C10-C11   | 1.529(5)  |
| C11-C12   | 1.523(7) | C12-C13   | 1.553(7) | C13-C14   | 1.515(7)  |
| C13-C23   | 1.545(7) | C13-C22   | 1.561(7) | C14-C15   | 1.400(7)  |
| C14-C19   | 1.417(6) | C15-C16   | 1.386(7) | C16-C17   | 1.406(7)  |
| C16-C24   | 1.454(7) | C17-C18   | 1.368(9) | C18-C19   | 1.380(9)  |
| C19-C20   | 1.503(7) | C20-C21   | 1.517(7) | C21-C22   | 1.521(6)  |
| C24-N1    | 1.142(6) | C1'-C6'   | 1.378(8) | C1'-C2'   | 1.389(8)  |
| C1'-Br1'  | 1.898(6) | C2'-C3'   | 1.360(9) | C3'-C4'   | 1.403(8)  |
| C4'-C5'   | 1.388(7) | C4'-C7'   | 1.476(8) | C5'-C6'   | 1.373(9)  |
| C7'-O1'   | 1.208(6) | C7'-O2'   | 1.349(7) | C8'-O2'   | 1.466(6)  |
| C8'-C9'   | 1.521(8) | C9'-C22'  | 1.538(7) | C9'-C10'  | 1.540(6)  |
| C10'-C11' | 1.539(6) | C11'-C12' | 1.514(7) | C12'-C13' | 1.547(6)  |
| C13'-C23' | 1.531(8) | C13'-C14' | 1.553(7) | C13'-C22' | 1.565(7)  |
| C14'-C19' | 1.398(7) | C14'-C15' | 1.402(8) | C15'-C16' | 1.382(8)  |
| C16'-C17' | 1.390(7) | C16'-C24' | 1.446(8) | C17'-C18' | 1.388(10) |
| C18'-C19' | 1.400(9) | C19'-C20' | 1.513(8) | C20'-C21' | 1.517(7)  |
| C21'-C22' | 1.510(6) | C24'-N1'  | 1.146(7) |           |           |

**Table 6. Bond Angles in Compound 99118, °**

|                |          |                |          |                |          |
|----------------|----------|----------------|----------|----------------|----------|
| C6-C1-C2       | 120.7(6) | C6-C1-Br1      | 119.9(4) | C2-C1-Br1      | 119.5(4) |
| C3-C2-C1       | 118.9(5) | C2-C3-C4       | 120.9(5) | C5-C4-C3       | 118.7(6) |
| C5-C4-C7       | 123.1(5) | C3-C4-C7       | 118.3(5) | C6-C5-C4       | 120.9(5) |
| C5-C6-C1       | 119.9(5) | O1-C7-O2       | 123.7(5) | O1-C7-C4       | 124.0(5) |
| O2-C7-C4       | 112.4(4) | O2-C8-C9       | 106.5(4) | C8-C9-C10      | 110.0(4) |
| C8-C9-C22      | 113.5(4) | C10-C9-C22     | 110.0(4) | C9-C10-C11     | 113.1(4) |
| C12-C11-C10    | 111.5(3) | C11-C12-C13    | 112.9(4) | C14-C13-C23    | 106.6(4) |
| C14-C13-C12    | 111.2(4) | C23-C13-C12    | 108.7(4) | C14-C13-C22    | 111.0(4) |
| C23-C13-C22    | 112.3(5) | C12-C13-C22    | 107.1(4) | C15-C14-C19    | 117.0(5) |
| C15-C14-C13    | 119.8(4) | C19-C14-C13    | 123.0(5) | C16-C15-C14    | 121.6(4) |
| C15-C16-C17    | 120.1(5) | C15-C16-C24    | 121.0(4) | C17-C16-C24    | 118.9(5) |
| C18-C17-C16    | 118.7(5) | C17-C18-C19    | 121.8(5) | C18-C19-C14    | 120.7(5) |
| C18-C19-C20    | 119.1(4) | C14-C19-C20    | 120.2(5) | C19-C20-C21    | 114.5(4) |
| C20-C21-C22    | 109.4(4) | C21-C22-C9     | 116.4(4) | C21-C22-C13    | 110.9(4) |
| C9-C22-C13     | 111.1(4) | N1-C24-C16     | 178.0(6) | C7-O2-C8       | 116.0(4) |
| C6'-C1'-C2'    | 121.1(6) | C6'-C1'-Br1'   | 118.5(4) | C2'-C1'-Br1'   | 120.3(4) |
| C3'-C2'-C1'    | 119.1(5) | C2'-C3'-C4'    | 121.2(5) | C5'-C4'-C3'    | 118.2(6) |
| C5'-C4'-C7'    | 123.0(5) | C3'-C4'-C7'    | 118.7(5) | C6'-C5'-C4'    | 121.2(5) |
| C5'-C6'-C1'    | 119.1(5) | O1'-C7'-O2'    | 123.4(6) | O1'-C7'-C4'    | 125.1(5) |
| O2'-C7'-C4'    | 111.5(5) | O2'-C8'-C9'    | 107.3(4) | C8'-C9'-C22'   | 109.2(4) |
| C8'-C9'-C10'   | 113.0(5) | C22'-C9'-C10'  | 109.5(4) | C11'-C10'-C9'  | 110.3(4) |
| C12'-C11'-C10' | 113.2(4) | C11'-C12'-C13' | 111.2(4) | C23'-C13'-C12' | 111.2(4) |
| C23'-C13'-C14' | 107.0(5) | C12'-C13'-C14' | 109.5(4) | C23'-C13'-C22' | 112.9(4) |
| C12'-C13'-C22' | 107.2(4) | C14'-C13'-C22' | 109.0(4) | C19'-C14'-C15' | 118.4(5) |
| C19'-C14'-C13' | 122.1(5) | C15'-C14'-C13' | 119.4(5) | C16'-C15'-C14' | 121.4(5) |
| C15'-C16'-C17' | 120.4(5) | C15'-C16'-C24' | 121.4(5) | C17'-C16'-C24' | 118.2(5) |
| C18'-C17'-C16' | 118.8(6) | C17'-C18'-C19' | 121.4(5) | C14'-C19'-C18' | 119.6(5) |
| C14'-C19'-C20' | 122.7(5) | C18'-C19'-C20' | 117.6(5) | C19'-C20'-C21' | 111.7(4) |
| C22'-C21'-C20' | 108.6(4) | C21'-C22'-C9'  | 117.9(4) | C21'-C22'-C13' | 111.5(4) |
| C9'-C22'-C13'  | 110.9(4) | N1'-C24'-C16'  | 176.5(6) | C7'-O2'-C8'    | 116.7(4) |

5.3.3 Aldehyde **13****X-ray Structure Determination of Compound 99127**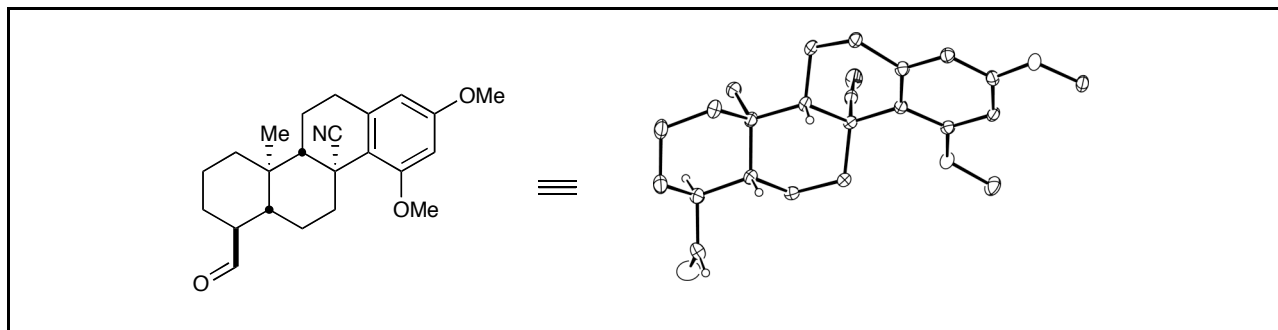

Compound 99127,  $C_{23}H_{31}NO_3$ , crystallizes in the monoclinic space group C2 (systematic absences  $hkl: h+k=\text{odd}$ ) with  $a=13.0078(3)\text{\AA}$ ,  $b=6.8941(2)\text{\AA}$ ,  $c=21.3275(6)\text{\AA}$ ,  $\beta=91.374(2)^\circ$ ,  $V=1912.04(9)\text{\AA}^3$ ,  $Z=4$ , and  $d_{\text{calc}}=1.284\text{ g/cm}^3$ . X-ray intensity data were collected on a Bruker APEXII CCD area detector employing graphite-monochromated Cu-K $\alpha$  radiation ( $\lambda=1.54178\text{ \AA}$ ) at a temperature of 153(1)K. Preliminary indexing was performed from a series of thirty-six  $0.5^\circ$  rotation frames with exposures of 30 seconds. A total of 2348 frames were collected with a crystal to detector distance of 37.628 mm, rotation widths of  $0.5^\circ$  and exposures of 30 seconds:

| scan type | $2\theta$ | $\omega$ | $\phi$  | $\chi$ | frames |
|-----------|-----------|----------|---------|--------|--------|
| $\phi$    | 92.00     | 88.66    | -2.53   | -26.26 | 690    |
| $\phi$    | 87.00     | 76.65    | -115.66 | 62.65  | 311    |
| $\omega$  | 32.00     | 26.05    | -74.74  | -33.72 | 197    |
| $\phi$    | 92.00     | 132.53   | -9.61   | -22.49 | 739    |
| $\omega$  | 92.00     | -12.19   | -42.47  | 90.29  | 153    |
| $\omega$  | -58.00    | -149.11  | -256.72 | 19.46  | 202    |
| $\omega$  | -43.00    | -35.31   | -224.99 | -80.21 | 131    |
| $\omega$  | 92.00     | -163.69  | -93.53  | -93.68 | 82     |

Rotation frames were integrated using SAINT<sup>35</sup>, producing a listing of unaveraged  $F^2$  and

(35) Bruker (2009) SAINT. Bruker AXS Inc., Madison, Wisconsin, USA.

$\sigma(F^2)$  values which were then passed to the SHELXTL<sup>36</sup> program package for further processing and structure solution on a Dell Pentium 4 computer. A total of 5967 reflections were measured over the ranges  $4.15 \leq \theta \leq 64.37^\circ$ ,  $-13 \leq h \leq 15$ ,  $-8 \leq k \leq 7$ ,  $-22 \leq l \leq 24$  yielding 2871 unique reflections ( $R_{int} = 0.0382$ ). The intensity data were corrected for Lorentz and polarization effects and for absorption using SADABS<sup>37</sup> (minimum and maximum transmission 0.787, 1.000).

The structure was solved by direct methods (SHELXS-97<sup>38</sup>). Refinement was by full-matrix least squares based on  $F^2$  using SHELXL-97.<sup>39</sup> All reflections were used during refinement. The weighting scheme used was  $w=1/[\sigma^2(F_o^2) + (0.0691P)^2 + 0.0000P]$  where  $P = (F_o^2 + 2F_c^2)/3$ . Non-hydrogen atoms were refined anisotropically and hydrogen atoms were refined using a riding model. Refinement converged to  $R1=0.0389$  and  $wR2=0.0957$  for 2478 observed reflections for which  $F > 4\sigma(F)$  and  $R1=0.0528$  and  $wR2=0.1215$  and  $GOF = 1.143$  for all 2871 unique, non-zero reflections and 257 variables.<sup>40</sup> The maximum  $\Delta/\sigma$  in the final cycle of least squares was 0.000 and the two most prominent peaks in the final difference Fourier were  $+0.323$  and  $-0.450$  e/Å<sup>3</sup>.

Table 1. lists cell information, data collection parameters, and refinement data. Final positional and equivalent isotropic thermal parameters are given in Tables 2. and 3. Anisotropic thermal parameters are in Table 4. Tables 5. and 6. list bond distances and bond angles. Figure 1. is an ORTEP<sup>41</sup> representation of the molecule with 30% probability thermal ellipsoids displayed.

---

(36) Bruker (2009) SHELXTL. Bruker AXS Inc., Madison, Wisconsin, USA.

(37) Sheldrick, G.M. (2007) SADABS. University of Göttingen, Germany.

(38) Sheldrick, G.M. *Acta Cryst.* **2008**, A64,112.

(39) Sheldrick, G.M. *Acta Cryst.* **2008**, A64,112.

(40)  $R1 = \sum ||F_o| - |F_c|| / \sum |F_o|$

$$wR2 = [\sum w(F_o^2 - F_c^2)^2 / \sum w(F_o^2)^2]^{1/2}$$
$$GOF = [\sum w(F_o^2 - F_c^2)^2 / (n - p)]^{1/2}$$

where  $n$  = the number of reflections and  $p$  = the number of parameters refined.

(41) "ORTEP-II: A Fortran Thermal Ellipsoid Plot Program for Crystal Structure Illustrations". Johnson, C. K. (1976) ORNL-5138.



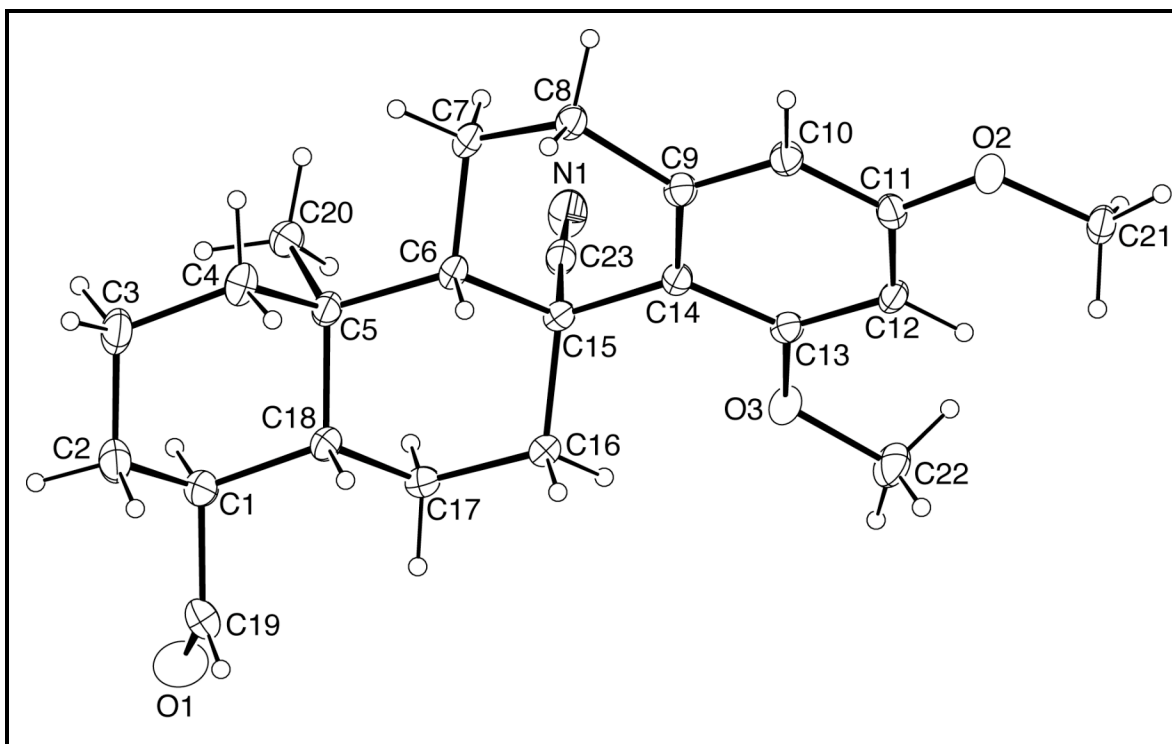

Figure 1. ORTEP drawing of the title compound with 30% probability thermal ellipsoids.

**Table 1. Summary of Structure Determination of Compound 99127**

|                                   |                                                 |
|-----------------------------------|-------------------------------------------------|
| Empirical formula                 | C <sub>23</sub> H <sub>31</sub> NO <sub>3</sub> |
| Formula weight                    | 369.49                                          |
| Temperature                       | 153(1) K                                        |
| Wavelength                        | 1.54178 Å                                       |
| Crystal system                    | monoclinic                                      |
| Space group                       | C2                                              |
| Cell constants:                   |                                                 |
| a                                 | 13.0078(3) Å                                    |
| b                                 | 6.8941(2) Å                                     |
| c                                 | 21.3275(6) Å                                    |
| β                                 | 91.374(2)°                                      |
| Volume                            | 1912.04(9) Å <sup>3</sup>                       |
| Z                                 | 4                                               |
| Density (calculated)              | 1.284 Mg/m <sup>3</sup>                         |
| Absorption coefficient            | 0.664 mm <sup>-1</sup>                          |
| F(000)                            | 800                                             |
| Crystal size                      | 0.48 x 0.08 x 0.005 mm <sup>3</sup>             |
| Theta range for data collection   | 4.15 to 64.37°                                  |
| Index ranges                      | -13 ≤ h ≤ 15, -8 ≤ k ≤ 7, -22 ≤ l ≤ 24          |
| Reflections collected             | 5967                                            |
| Independent reflections           | 2871 [R(int) = 0.0382]                          |
| Completeness to theta = 64.37°    | 96.9 %                                          |
| Absorption correction             | Semi-empirical from equivalents                 |
| Max. and min. transmission        | 1.000 and 0.787                                 |
| Refinement method                 | Full-matrix least-squares on F <sup>2</sup>     |
| Data / restraints / parameters    | 2871 / 1 / 257                                  |
| Goodness-of-fit on F <sup>2</sup> | 1.143                                           |
| Final R indices [I > 2σ(I)]       | R1 = 0.0389, wR2 = 0.0957                       |
| R indices (all data)              | R1 = 0.0528, wR2 = 0.1215                       |
| Absolute structure parameter      | 0.0(3)                                          |
| Largest diff. peak and hole       | 0.323 and -0.450 e.Å <sup>-3</sup>              |

**Table 2. Refined Positional Parameters for Compound 99127**

| Atom | x           | y          | z           | $U_{eq}, \text{\AA}^2$ |
|------|-------------|------------|-------------|------------------------|
| C1   | 0.2497(2)   | 0.7868(4)  | 0.92022(14) | 0.0368(7)              |
| C2   | 0.1531(3)   | 0.8916(5)  | 0.94142(15) | 0.0442(8)              |
| C3   | 0.0554(2)   | 0.7850(5)  | 0.92201(15) | 0.0390(7)              |
| C4   | 0.0521(2)   | 0.7290(5)  | 0.85280(14) | 0.0337(7)              |
| C5   | 0.1483(2)   | 0.6180(4)  | 0.83196(13) | 0.0257(6)              |
| C6   | 0.14177(18) | 0.5956(4)  | 0.75942(13) | 0.0223(6)              |
| C7   | 0.0524(2)   | 0.4704(4)  | 0.73550(13) | 0.0275(6)              |
| C8   | 0.02802(18) | 0.5226(5)  | 0.66836(13) | 0.0292(6)              |
| C9   | 0.12224(18) | 0.5322(4)  | 0.62809(13) | 0.0251(6)              |
| C10  | 0.10570(19) | 0.5358(4)  | 0.56350(13) | 0.0272(6)              |
| C11  | 0.18614(19) | 0.5380(4)  | 0.52271(12) | 0.0249(5)              |
| C12  | 0.28643(18) | 0.5310(4)  | 0.54605(12) | 0.0245(6)              |
| C13  | 0.30340(17) | 0.5253(4)  | 0.61104(12) | 0.0231(5)              |
| C14  | 0.22286(17) | 0.5331(4)  | 0.65406(12) | 0.0217(5)              |
| C15  | 0.24224(17) | 0.5310(4)  | 0.72599(12) | 0.0218(5)              |
| C16  | 0.33204(19) | 0.6627(4)  | 0.74975(13) | 0.0271(6)              |
| C17  | 0.3403(2)   | 0.6695(4)  | 0.82111(13) | 0.0313(6)              |
| C18  | 0.2423(2)   | 0.7467(4)  | 0.84912(13) | 0.0276(6)              |
| C19  | 0.3430(3)   | 0.9070(6)  | 0.93617(16) | 0.0525(10)             |
| C20  | 0.1523(2)   | 0.4203(4)  | 0.86506(13) | 0.0316(7)              |
| C21  | 0.24179(19) | 0.5394(4)  | 0.41634(13) | 0.0289(6)              |
| C22  | 0.4861(2)   | 0.5134(6)  | 0.59557(15) | 0.0395(7)              |
| C23  | 0.2703(2)   | 0.3269(4)  | 0.74124(13) | 0.0268(6)              |
| N1   | 0.2947(2)   | 0.1691(4)  | 0.75049(13) | 0.0400(6)              |
| O1   | 0.4176(4)   | 0.8472(9)  | 0.9693(3)   | 0.0788(18)             |
| O1'  | 0.3371(5)   | 1.0886(10) | 0.9378(4)   | 0.081(2)               |
| O2   | 0.16023(12) | 0.5427(3)  | 0.46039(9)  | 0.0304(5)              |
| O3   | 0.40055(13) | 0.5051(3)  | 0.63624(9)  | 0.0305(5)              |

$$U_{eq} = \frac{1}{3} [U_{11}(aa^*)^2 + U_{22}(bb^*)^2 + U_{33}(cc^*)^2 + 2U_{12}aa^*bb^*\cos\gamma + 2U_{13}aa^*cc^*\cos\beta + 2U_{23}bb^*cc^*\cos\alpha]$$

**Table 3. Positional Parameters for Hydrogens in Compound 99127**

| Atom | x       | y      | z      | $U_{iso}, \text{\AA}^2$ |
|------|---------|--------|--------|-------------------------|
| H1   | 0.2553  | 0.6627 | 0.9425 | 0.049                   |
| H2a  | 0.1558  | 0.9048 | 0.9867 | 0.059                   |
| H2b  | 0.1515  | 1.0209 | 0.9235 | 0.059                   |
| H3a  | -0.0034 | 0.8667 | 0.9306 | 0.052                   |
| H3b  | 0.0496  | 0.6684 | 0.9472 | 0.052                   |
| H4a  | 0.0448  | 0.8458 | 0.8278 | 0.045                   |
| H4b  | -0.0081 | 0.6490 | 0.8445 | 0.045                   |
| H6   | 0.1270  | 0.7261 | 0.7434 | 0.030                   |
| H7a  | 0.0708  | 0.3343 | 0.7385 | 0.037                   |
| H7b  | -0.0074 | 0.4924 | 0.7609 | 0.037                   |
| H8a  | -0.0062 | 0.6476 | 0.6672 | 0.039                   |
| H8b  | -0.0193 | 0.4273 | 0.6507 | 0.039                   |
| H10  | 0.0386  | 0.5367 | 0.5474 | 0.036                   |
| H12  | 0.3414  | 0.5302 | 0.5190 | 0.033                   |
| H16a | 0.3961  | 0.6144 | 0.7334 | 0.036                   |
| H16b | 0.3215  | 0.7931 | 0.7338 | 0.036                   |
| H17a | 0.3538  | 0.5401 | 0.8371 | 0.042                   |
| H17b | 0.3975  | 0.7520 | 0.8338 | 0.042                   |
| H18  | 0.2293  | 0.8725 | 0.8291 | 0.037                   |
| H19  | 0.3458  | 1.0329 | 0.9206 | 0.070                   |
| H19' | 0.4056  | 0.8464 | 0.9449 | 0.070                   |
| H20a | 0.1410  | 0.4377 | 0.9090 | 0.047                   |
| H20b | 0.2185  | 0.3621 | 0.8594 | 0.047                   |
| H20c | 0.0998  | 0.3373 | 0.8474 | 0.047                   |
| H21a | 0.2877  | 0.6458 | 0.4247 | 0.043                   |
| H21b | 0.2134  | 0.5508 | 0.3745 | 0.043                   |
| H21c | 0.2788  | 0.4194 | 0.4203 | 0.043                   |
| H22a | 0.4825  | 0.4068 | 0.5666 | 0.059                   |
| H22b | 0.5489  | 0.5055 | 0.6200 | 0.059                   |
| H22c | 0.4844  | 0.6334 | 0.5727 | 0.059                   |

**Table 4. Refined Thermal Parameters (U's) for Compound 99127**

| Atom                                                   | U <sub>11</sub>                                                                                         | U <sub>22</sub> | U <sub>33</sub> | U <sub>23</sub> | U <sub>13</sub> | U <sub>12</sub> |
|--------------------------------------------------------|---------------------------------------------------------------------------------------------------------|-----------------|-----------------|-----------------|-----------------|-----------------|
| C1                                                     | 0.0472(17)                                                                                              | 0.0382(18)      | 0.0250(16)      | -0.0003(14)     | 0.0050(13)      | -0.0143(14)     |
| C2                                                     | 0.060(2)                                                                                                | 0.0422(17)      | 0.0310(18)      | -0.0084(16)     | 0.0167(14)      | -0.0092(16)     |
| C3                                                     | 0.0451(17)                                                                                              | 0.0427(18)      | 0.0300(17)      | -0.0027(15)     | 0.0152(13)      | 0.0021(14)      |
| C4                                                     | 0.0321(14)                                                                                              | 0.0391(17)      | 0.0304(17)      | 0.0009(14)      | 0.0097(12)      | 0.0038(12)      |
| C5                                                     | 0.0274(14)                                                                                              | 0.0270(14)      | 0.0229(15)      | 0.0015(12)      | 0.0061(11)      | -0.0015(11)     |
| C6                                                     | 0.0224(12)                                                                                              | 0.0226(12)      | 0.0222(15)      | 0.0028(11)      | 0.0061(10)      | 0.0016(10)      |
| C7                                                     | 0.0236(13)                                                                                              | 0.0336(16)      | 0.0258(15)      | 0.0009(12)      | 0.0078(10)      | -0.0028(11)     |
| C8                                                     | 0.0227(12)                                                                                              | 0.0396(15)      | 0.0254(14)      | -0.0025(14)     | 0.0046(10)      | -0.0028(13)     |
| C9                                                     | 0.0226(12)                                                                                              | 0.0243(12)      | 0.0284(15)      | -0.0021(13)     | 0.0038(10)      | 0.0019(12)      |
| C10                                                    | 0.0224(12)                                                                                              | 0.0344(14)      | 0.0250(14)      | -0.0009(14)     | 0.0006(10)      | 0.0000(12)      |
| C11                                                    | 0.0313(13)                                                                                              | 0.0225(12)      | 0.0211(14)      | -0.0014(13)     | 0.0024(10)      | 0.0014(12)      |
| C12                                                    | 0.0253(12)                                                                                              | 0.0224(12)      | 0.0264(15)      | -0.0003(12)     | 0.0105(10)      | -0.0019(11)     |
| C13                                                    | 0.0213(12)                                                                                              | 0.0208(12)      | 0.0275(15)      | -0.0008(12)     | 0.0031(10)      | 0.0002(11)      |
| C14                                                    | 0.0247(12)                                                                                              | 0.0172(11)      | 0.0234(14)      | 0.0003(12)      | 0.0048(10)      | 0.0016(11)      |
| C15                                                    | 0.0203(11)                                                                                              | 0.0204(11)      | 0.0250(14)      | 0.0013(13)      | 0.0031(10)      | -0.0005(11)     |
| C16                                                    | 0.0256(14)                                                                                              | 0.0299(14)      | 0.0260(15)      | -0.0017(12)     | 0.0054(11)      | -0.0060(11)     |
| C17                                                    | 0.0275(14)                                                                                              | 0.0389(15)      | 0.0276(16)      | -0.0022(14)     | 0.0021(11)      | -0.0113(13)     |
| C18                                                    | 0.0333(14)                                                                                              | 0.0270(13)      | 0.0228(15)      | 0.0029(12)      | 0.0053(11)      | -0.0055(11)     |
| C19                                                    | 0.059(2)                                                                                                | 0.071(3)        | 0.0281(19)      | -0.0174(19)     | 0.0059(16)      | -0.025(2)       |
| C20                                                    | 0.0388(16)                                                                                              | 0.0310(14)      | 0.0250(16)      | 0.0037(13)      | 0.0030(12)      | -0.0067(12)     |
| C21                                                    | 0.0316(13)                                                                                              | 0.0323(14)      | 0.0232(14)      | 0.0002(14)      | 0.0090(10)      | 0.0005(13)      |
| C22                                                    | 0.0222(13)                                                                                              | 0.0590(19)      | 0.0376(18)      | 0.0001(17)      | 0.0082(11)      | 0.0027(15)      |
| C23                                                    | 0.0293(14)                                                                                              | 0.0283(15)      | 0.0230(15)      | -0.0006(12)     | 0.0064(11)      | -0.0005(11)     |
| N1                                                     | 0.0529(16)                                                                                              | 0.0284(13)      | 0.0393(16)      | 0.0039(12)      | 0.0117(12)      | 0.0079(12)      |
| O1                                                     | 0.062(3)                                                                                                | 0.117(5)        | 0.057(3)        | -0.001(3)       | -0.006(3)       | -0.040(3)       |
| O1'                                                    | 0.067(4)                                                                                                | 0.058(4)        | 0.119(7)        | -0.024(4)       | 0.002(4)        | -0.030(3)       |
| O2                                                     | 0.0278(9)                                                                                               | 0.0414(11)      | 0.0221(10)      | 0.0006(10)      | 0.0049(7)       | 0.0002(9)       |
| O3                                                     | 0.0198(8)                                                                                               | 0.0434(11)      | 0.0287(10)      | -0.0003(9)      | 0.0058(7)       | 0.0018(8)       |
| The form of the anisotropic displacement parameter is: | $\exp[-2\pi^2(a^2U_{11}h^2+b^2U_{22}k^2+c^2U_{33}l^2+2b^*c^*U_{23}kl+2a^*c^*U_{13}hl+2a^*b^*U_{12}hk)]$ |                 |                 |                 |                 |                 |

**Table 5. Bond Distances in Compound 99127, Å**

|         |          |         |          |         |          |
|---------|----------|---------|----------|---------|----------|
| C1-C19  | 1.502(5) | C1-C2   | 1.527(4) | C1-C18  | 1.542(4) |
| C2-C3   | 1.517(5) | C3-C4   | 1.525(4) | C4-C5   | 1.541(4) |
| C5-C20  | 1.536(4) | C5-C18  | 1.547(4) | C5-C6   | 1.555(4) |
| C6-C7   | 1.526(4) | C6-C15  | 1.568(3) | C7-C8   | 1.503(4) |
| C8-C9   | 1.515(4) | C9-C10  | 1.389(4) | C9-C14  | 1.409(3) |
| C10-C11 | 1.377(4) | C11-O2  | 1.364(3) | C11-C12 | 1.386(3) |
| C12-C13 | 1.399(4) | C13-O3  | 1.368(3) | C13-C14 | 1.410(4) |
| C14-C15 | 1.549(4) | C15-C23 | 1.488(4) | C15-C16 | 1.555(3) |
| C16-C17 | 1.524(4) | C17-C18 | 1.516(4) | C19-O1' | 1.254(8) |
| C19-O1  | 1.256(7) | C21-O2  | 1.434(3) | C22-O3  | 1.428(3) |
| C23-N1  | 1.148(4) |         |          |         |          |

**Table 6. Bond Angles in Compound 99127, °**

|             |          |             |            |             |            |
|-------------|----------|-------------|------------|-------------|------------|
| C19-C1-C2   | 109.8(3) | C19-C1-C18  | 110.6(2)   | C2-C1-C18   | 110.1(2)   |
| C3-C2-C1    | 112.3(3) | C2-C3-C4    | 113.0(3)   | C3-C4-C5    | 113.6(3)   |
| C20-C5-C4   | 109.1(2) | C20-C5-C18  | 112.5(2)   | C4-C5-C18   | 106.9(2)   |
| C20-C5-C6   | 111.7(2) | C4-C5-C6    | 108.1(2)   | C18-C5-C6   | 108.4(2)   |
| C7-C6-C5    | 114.3(2) | C7-C6-C15   | 108.9(2)   | C5-C6-C15   | 117.02(19) |
| C8-C7-C6    | 108.9(2) | C7-C8-C9    | 113.3(2)   | C10-C9-C14  | 120.7(2)   |
| C10-C9-C8   | 117.1(2) | C14-C9-C8   | 122.3(2)   | C11-C10-C9  | 121.7(2)   |
| O2-C11-C10  | 116.3(2) | O2-C11-C12  | 124.0(2)   | C10-C11-C12 | 119.7(2)   |
| C11-C12-C13 | 118.8(2) | O3-C13-C12  | 121.0(2)   | O3-C13-C14  | 116.2(2)   |
| C12-C13-C14 | 122.8(2) | C9-C14-C13  | 116.2(2)   | C9-C14-C15  | 121.1(2)   |
| C13-C14-C15 | 122.6(2) | C23-C15-C14 | 105.0(2)   | C23-C15-C16 | 107.6(2)   |
| C14-C15-C16 | 114.9(2) | C23-C15-C6  | 111.8(2)   | C14-C15-C6  | 109.27(18) |
| C16-C15-C6  | 108.3(2) | C17-C16-C15 | 112.2(2)   | C18-C17-C16 | 111.4(2)   |
| C17-C18-C1  | 114.7(2) | C17-C18-C5  | 111.9(2)   | C1-C18-C5   | 111.4(2)   |
| O1'-C19-O1  | 111.1(5) | O1'-C19-C1  | 120.4(5)   | O1-C19-C1   | 123.7(4)   |
| N1-C23-C15  | 176.8(3) | C11-O2-C21  | 117.95(19) | C13-O3-C22  | 118.9(2)   |

# Enantioselective Polyene Cyclization via Organo-SOMO Catalysis

Sebastian Rendler and David W. C. MacMillan\*

*Merck Center for Catalysis at Princeton University, Princeton, New Jersey 08544*

[dmacmill@princeton.edu](mailto:dmacmill@princeton.edu)

## Supporting Information II

### Contents

|                                                                                                                  |     |
|------------------------------------------------------------------------------------------------------------------|-----|
| 1 Copies of $^1\text{H}$ and $^{13}\text{C}$ NMR Spectra of Cyclization Products and Their Respective Precursors | S2  |
| 2 Copies of HPLC Traces of Products <b>5</b> , <b>7-16</b>                                                       | S33 |

# 1 Copies of $^1\text{H}$ and $^{13}\text{C}$ NMR Spectra of Cyclization Products and Their Respective Precursors

## 1.1 Bicyclization to give aldehyde **7** (**6** $\rightarrow$ **7**, Table 2)

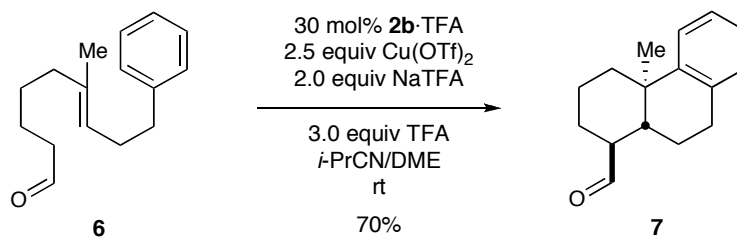

### **6** ( $^1\text{H}$ NMR, 500 MHz, $\text{CDCl}_3$ )

SR-1-082 Rendler/MacMillan (500 MHz,  $\text{CDCl}_3$ )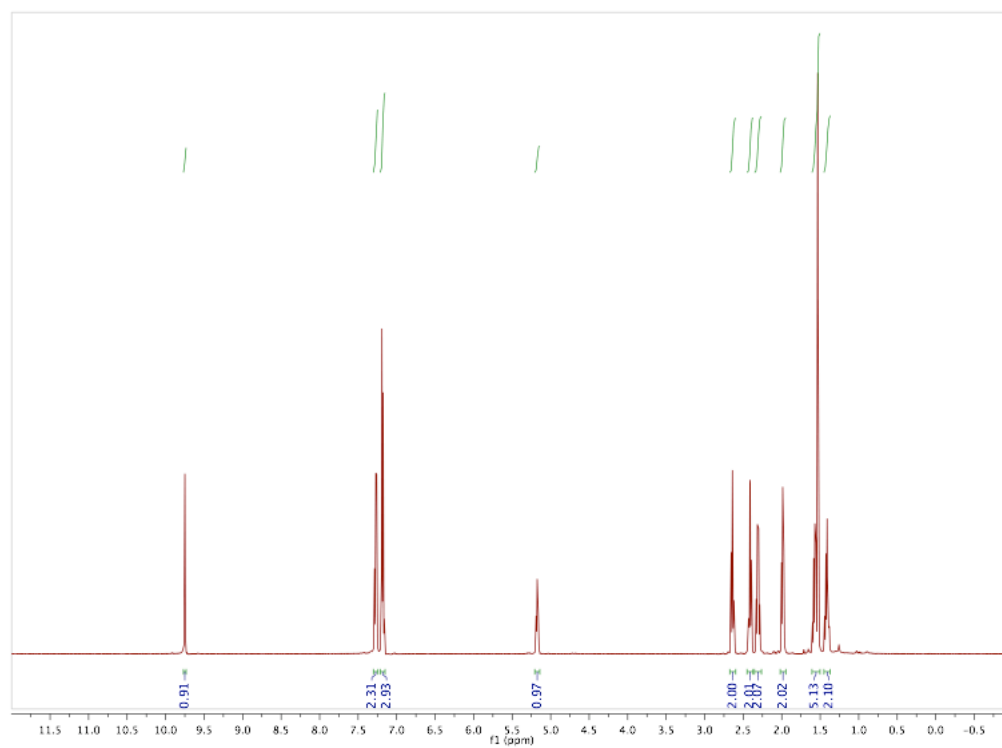



**6** ( $^{13}\text{C}$  NMR, 125 MHz,  $\text{CDCl}_3$ )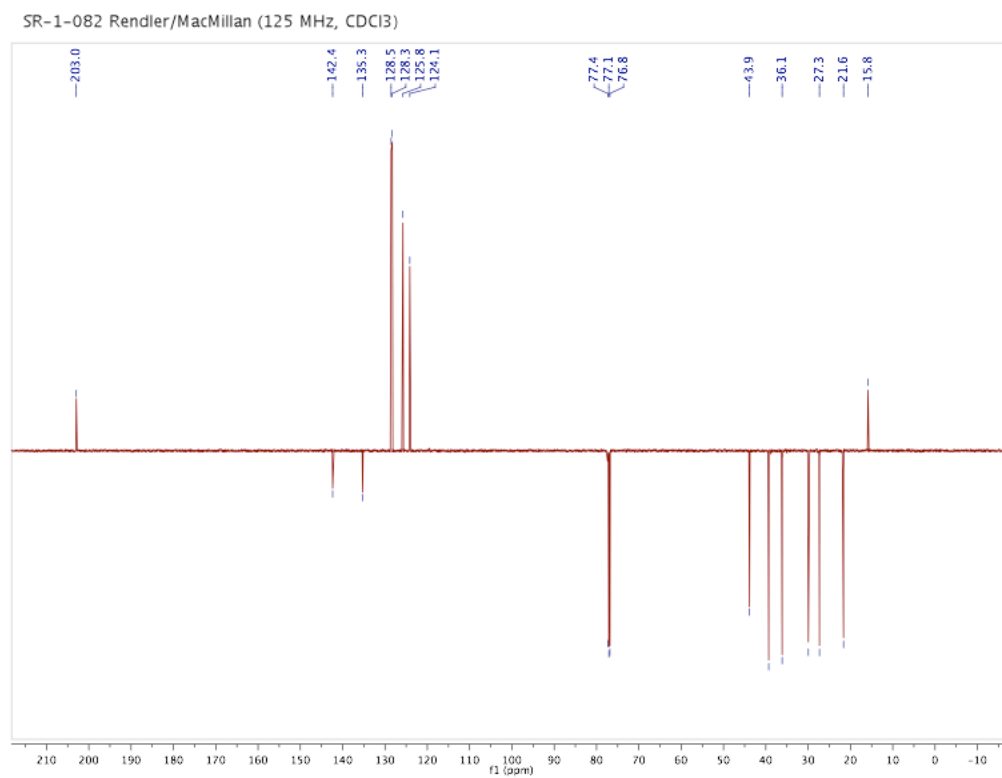**7** ( $^1\text{H}$  NMR, 500 MHz,  $\text{CDCl}_3$ )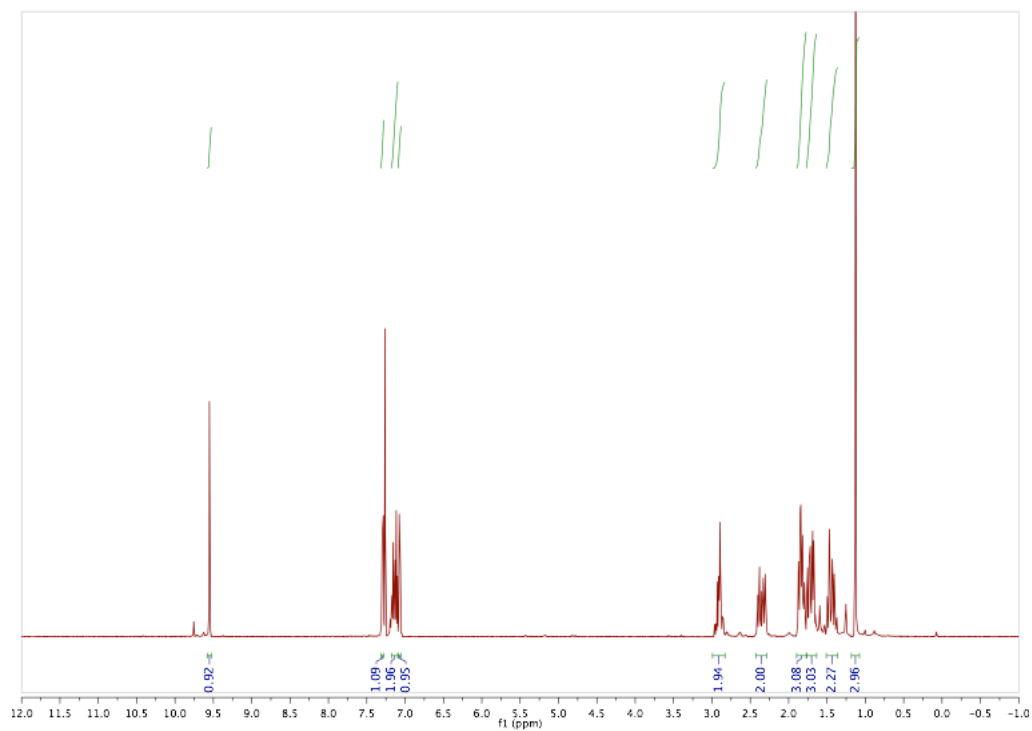

7 ( $^{13}\text{C}$  NMR, 125 MHz,  $\text{CDCl}_3$ )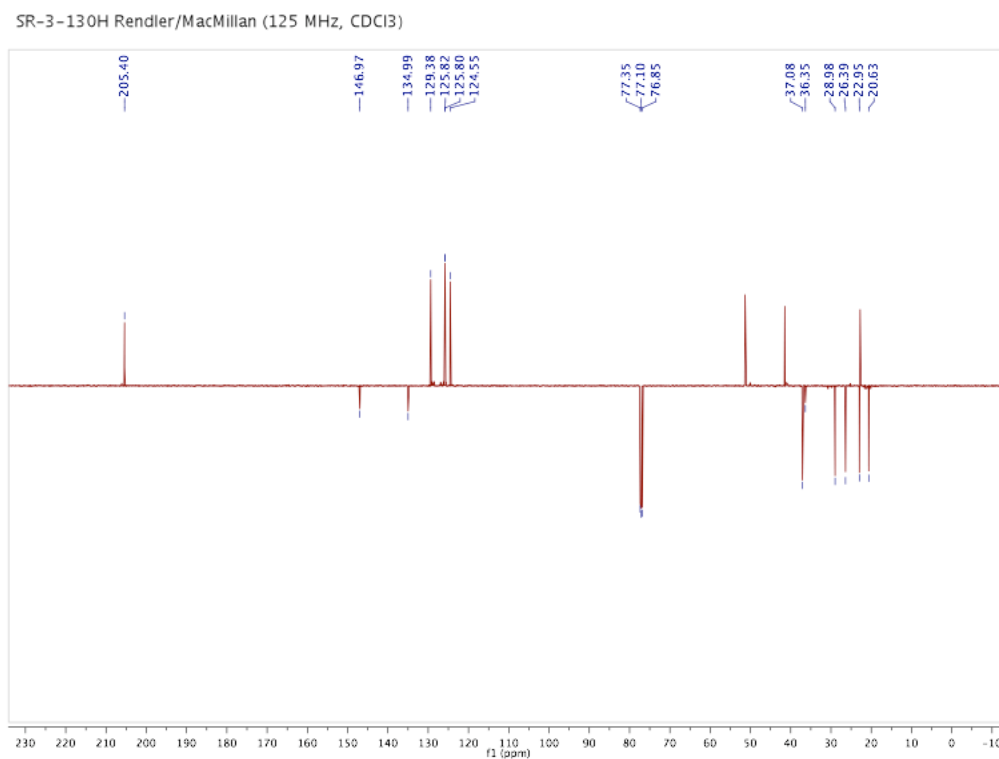1.2 Bicyclization to give aldehyde **8** (**18**  $\rightarrow$  **8**, Table 2)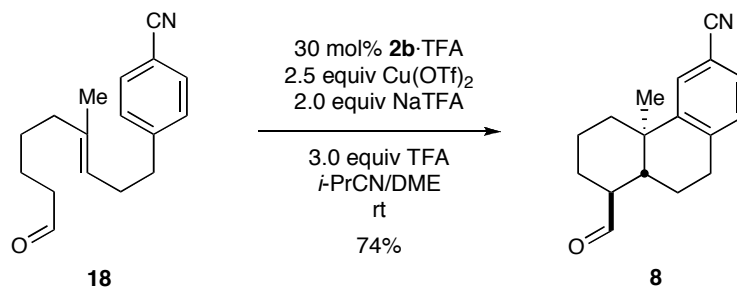

**18** ( $^1\text{H}$  NMR, 500 MHz,  $\text{CDCl}_3$ )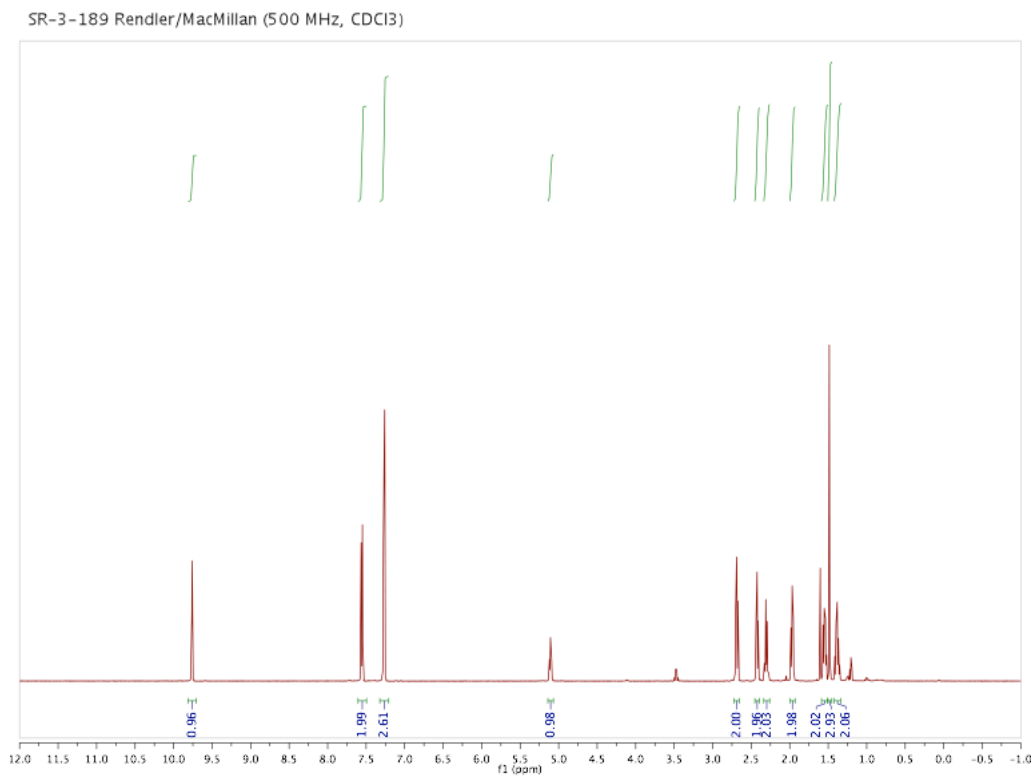**18** ( $^{13}\text{C}$  NMR, 125 MHz,  $\text{CDCl}_3$ )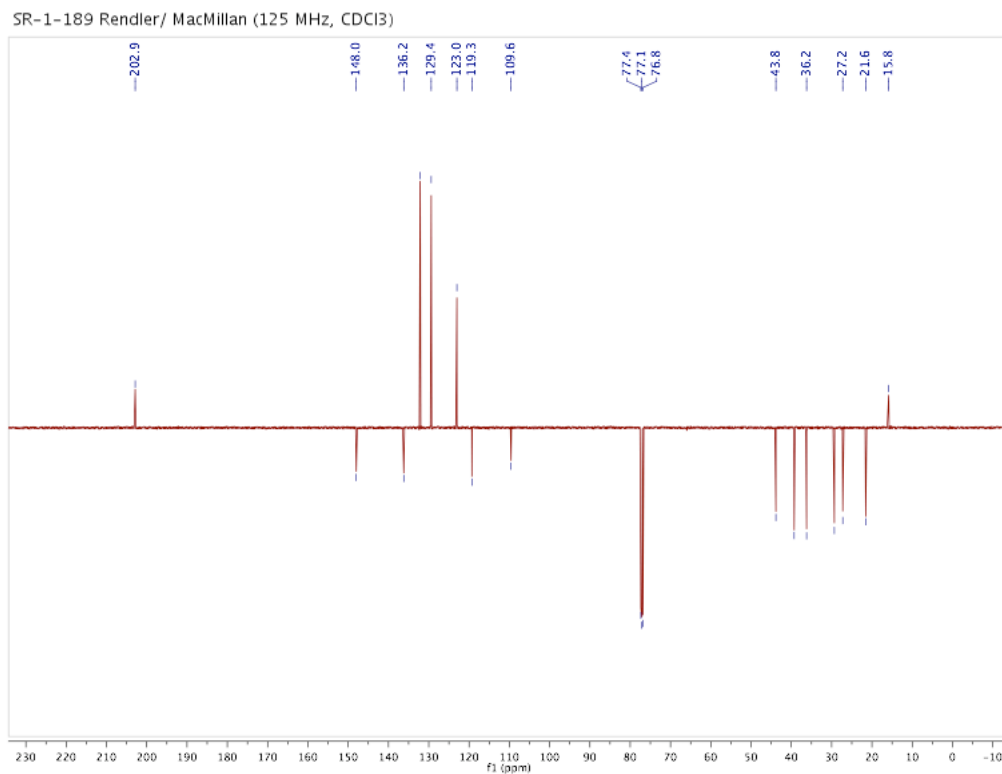

**8** ( $^1\text{H}$  NMR, 500 MHz,  $\text{CDCl}_3$ )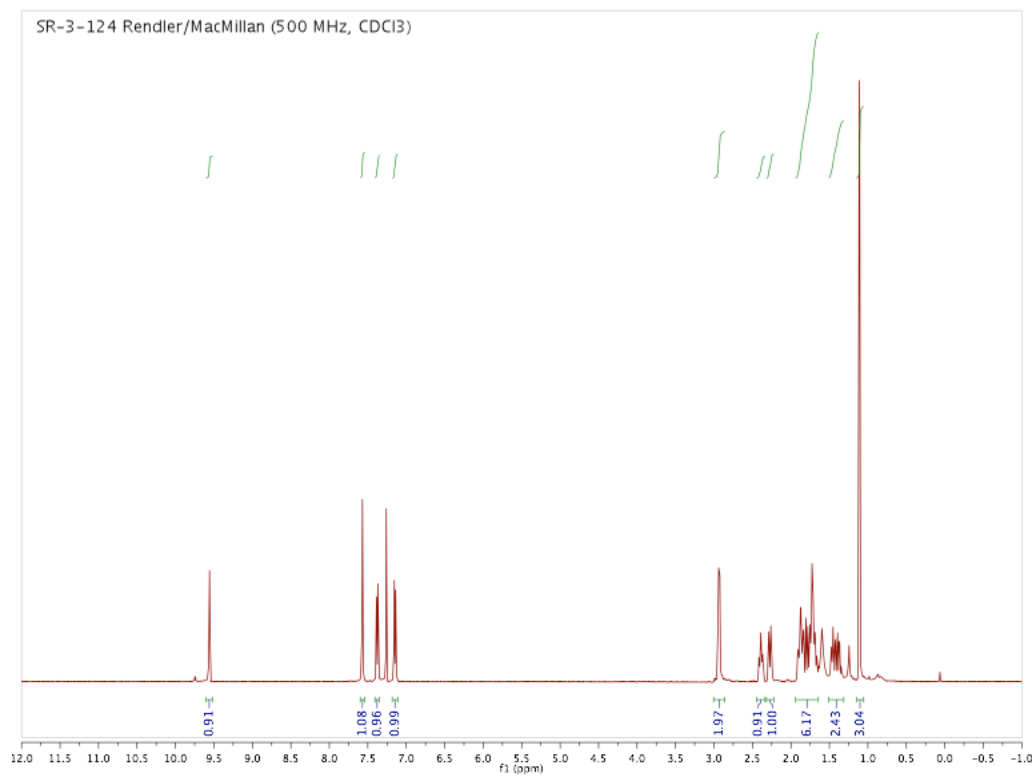**8** ( $^{13}\text{C}$  NMR, 125 MHz,  $\text{CDCl}_3$ )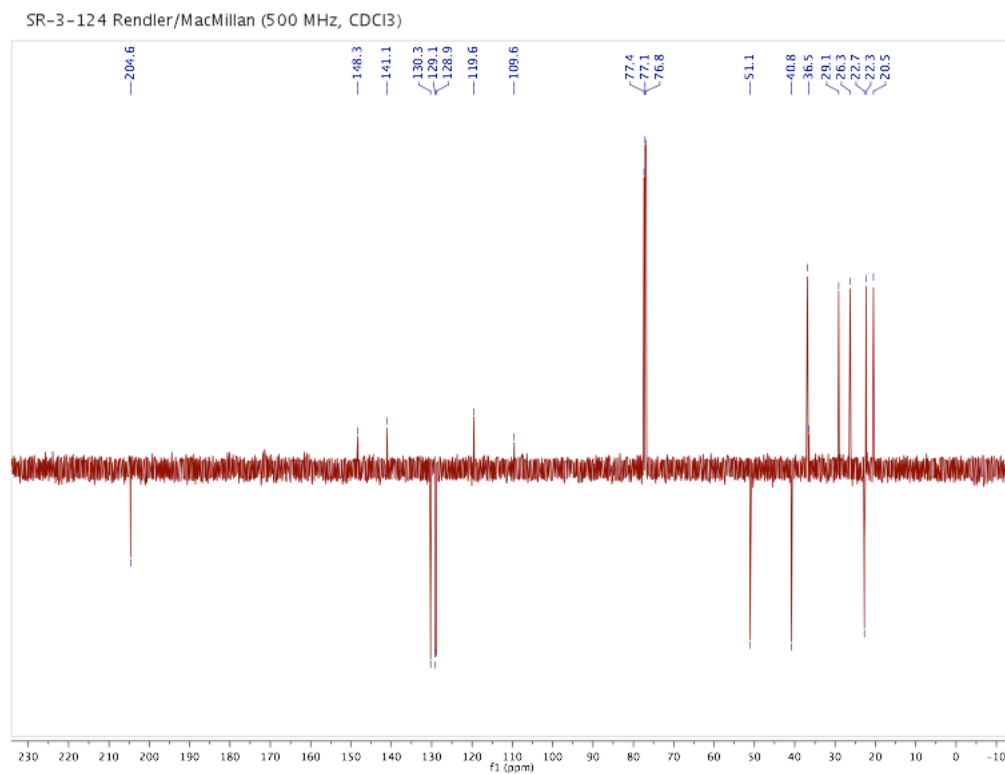

1.3 Bicyclization to give aldehyde **9** (**19** → **9**, Table 2)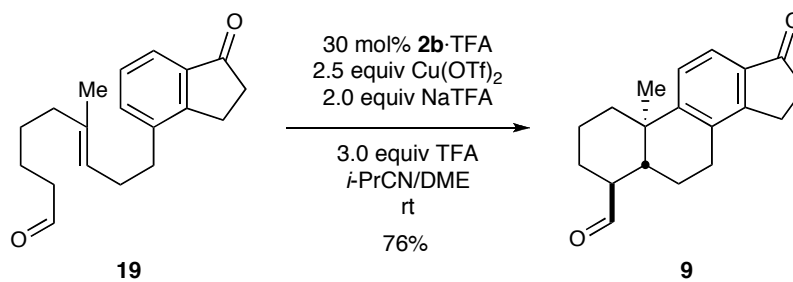**19** (<sup>1</sup>H NMR, 500 MHz, CDCl<sub>3</sub>)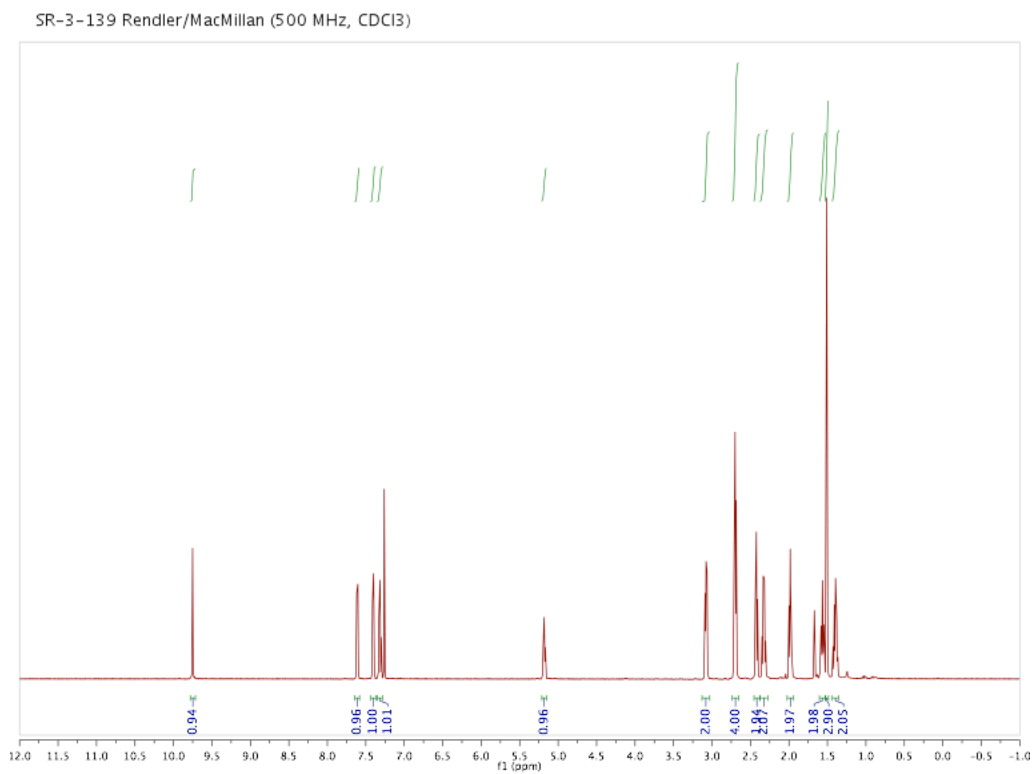

19 ( $^{13}\text{C}$  NMR, 125 MHz,  $\text{CDCl}_3$ )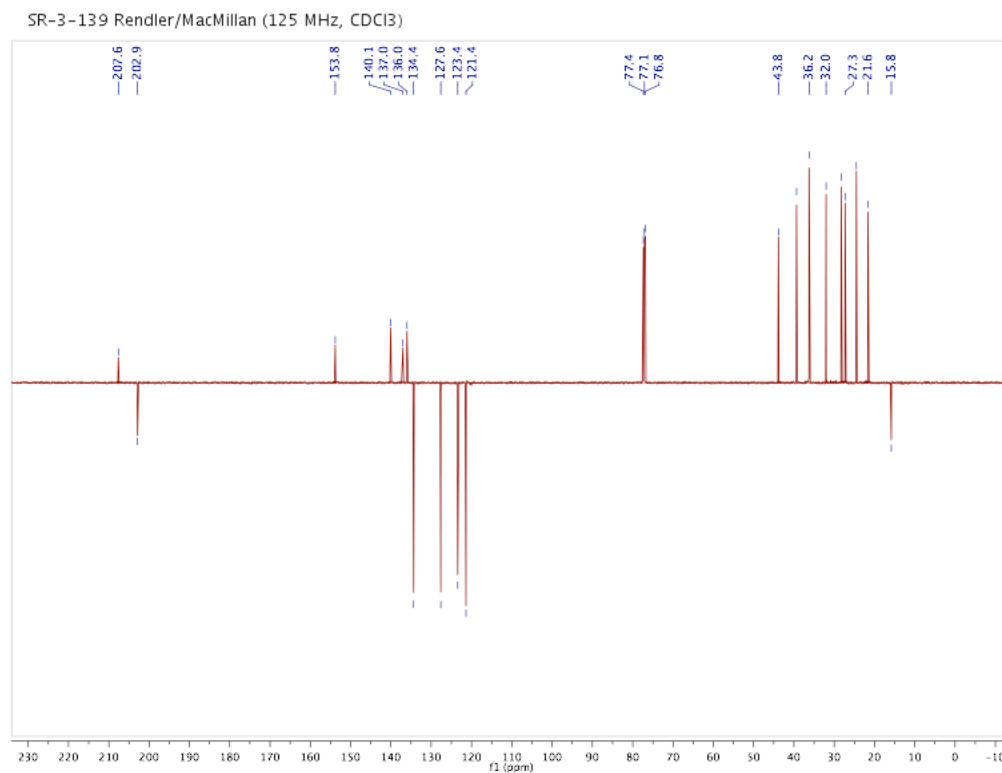9 ( $^1\text{H}$  NMR, 500 MHz,  $\text{CDCl}_3$ )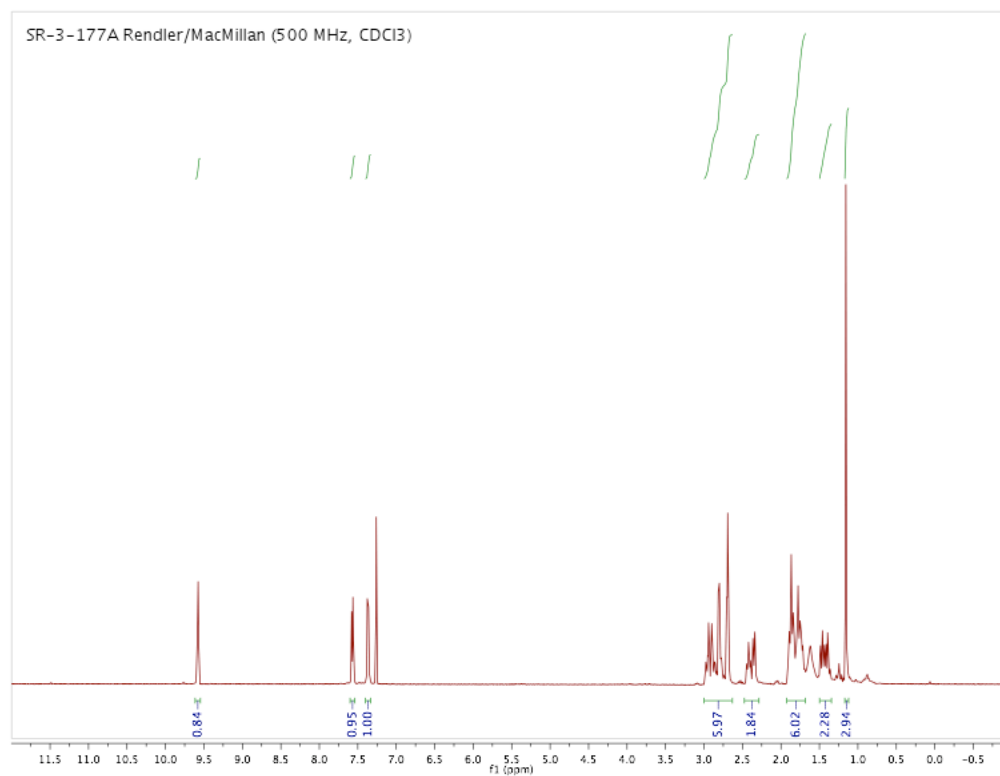

**9** ( $^{13}\text{C}$  NMR, 125 MHz,  $\text{CDCl}_3$ )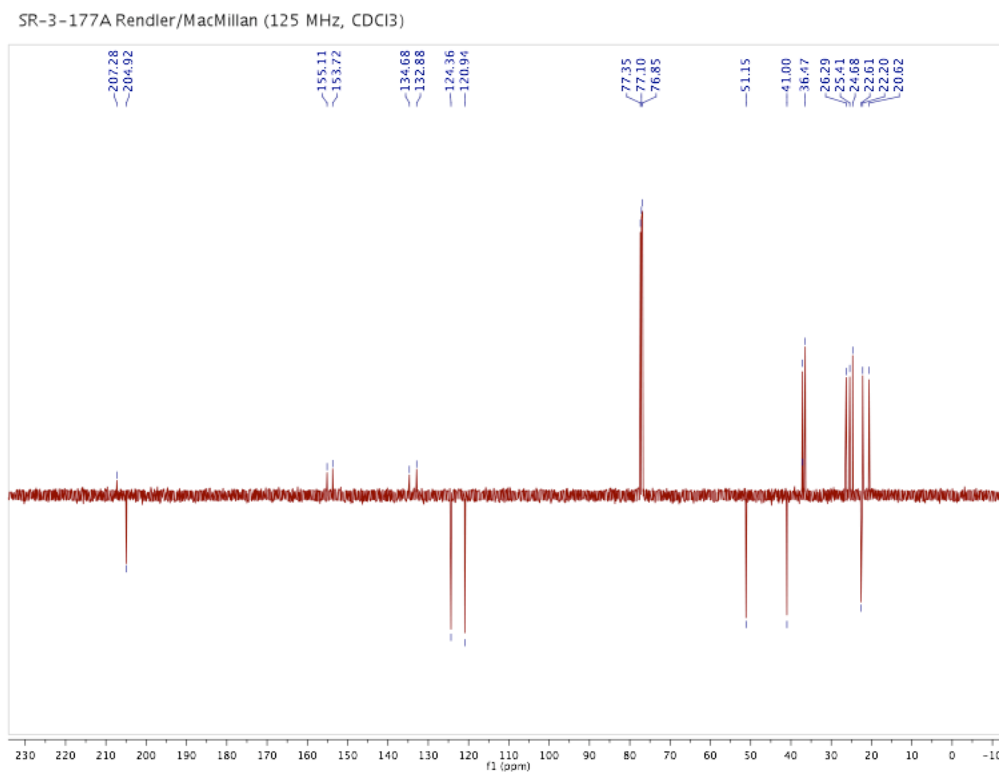1.4 Bicyclization to give aldehyde **10** (**20**  $\rightarrow$  **10**, Table 2)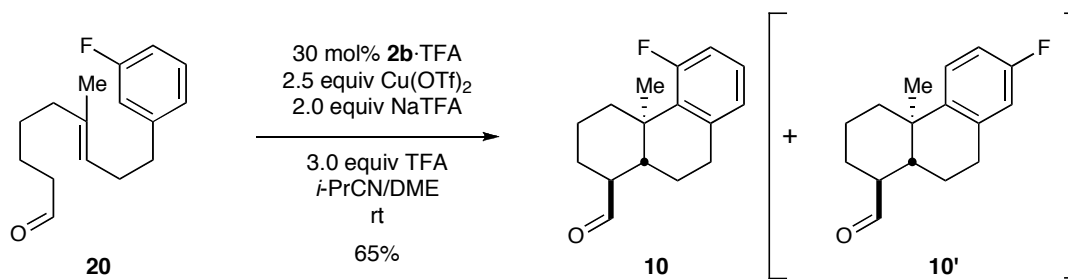

**20** ( $^1\text{H}$  NMR, 500 MHz,  $\text{CDCl}_3$ )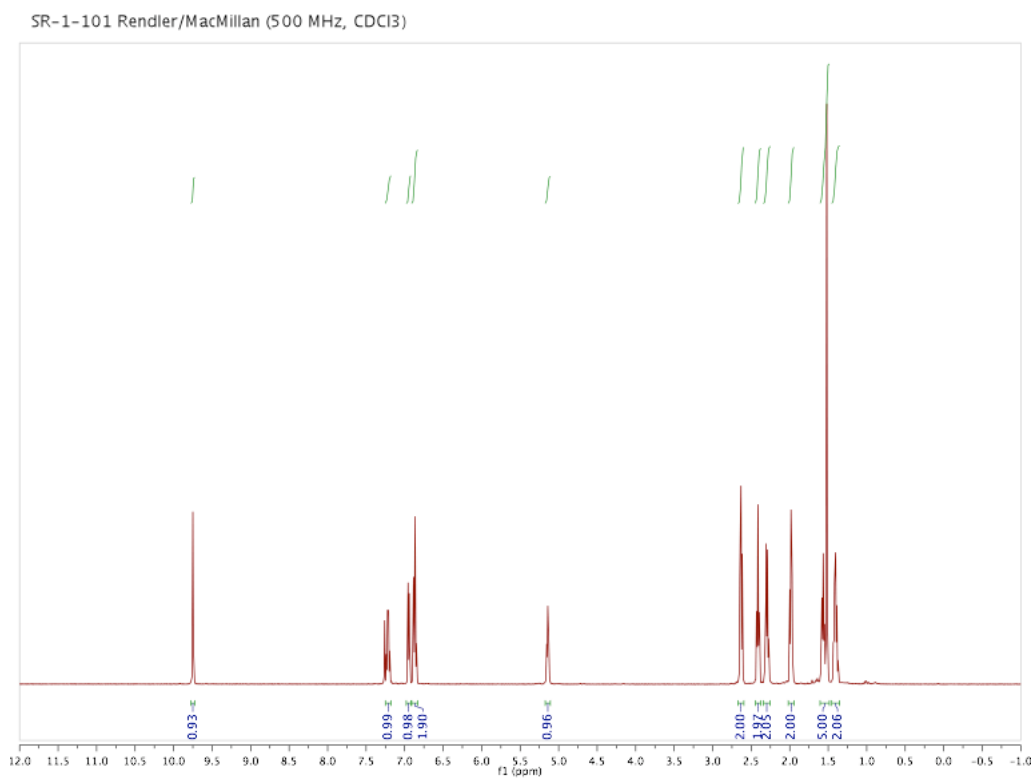**20** ( $^{13}\text{C}$  NMR, 125 MHz,  $\text{CDCl}_3$ )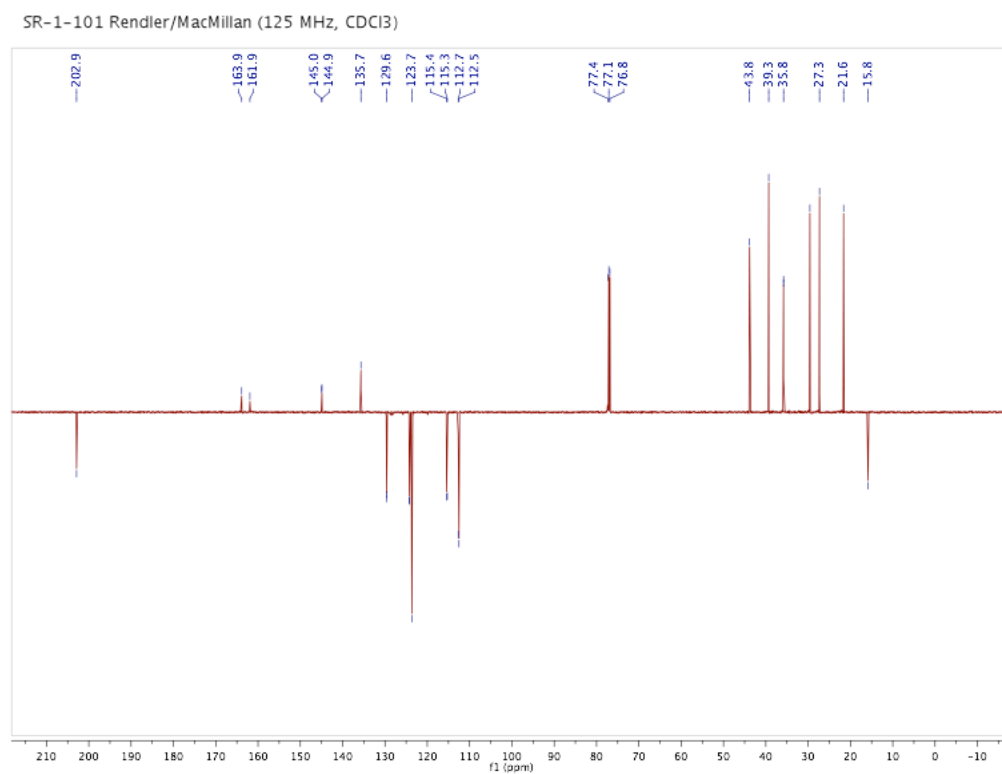



**10** ( $^1\text{H}$  NMR, 500 MHz,  $\text{CDCl}_3$ )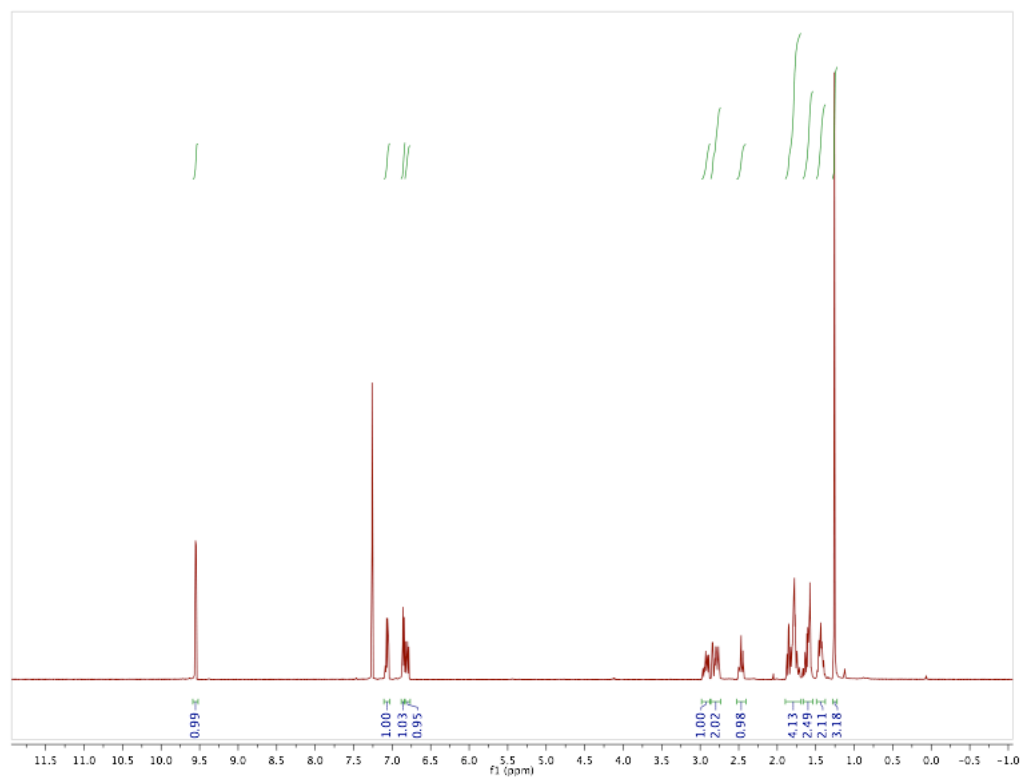**10** ( $^{13}\text{C}$  NMR, 125 MHz,  $\text{CDCl}_3$ )SR-3-132A Rendler/MacMillan (500 MHz,  $\text{CDCl}_3$ )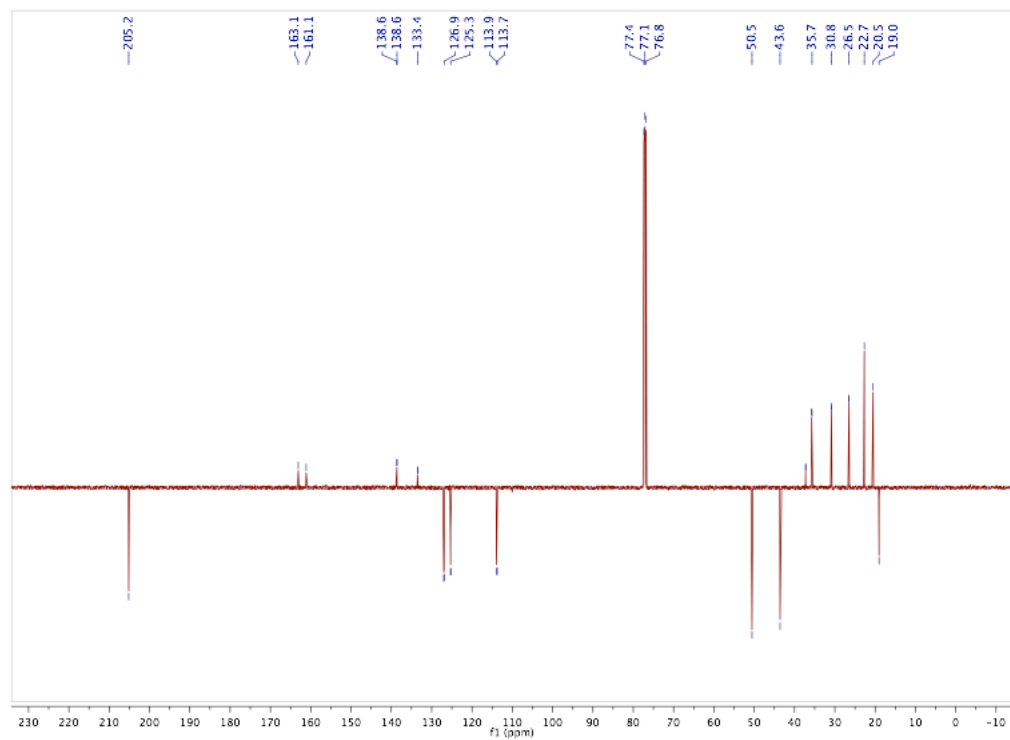

1.5 Bicyclization to give aldehyde **11** (**21** → **11**, Table 2)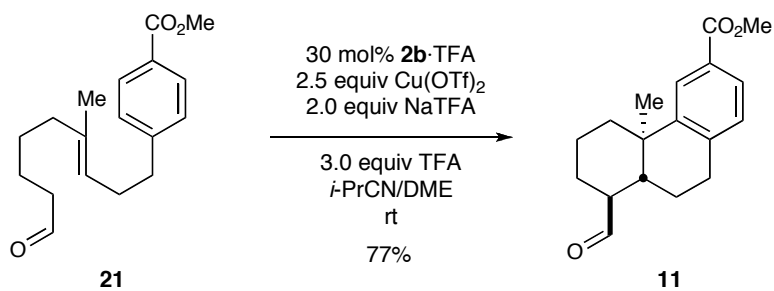

**21** ( $^1\text{H NMR}$ , 500 MHz,  $\text{CDCl}_3$ )

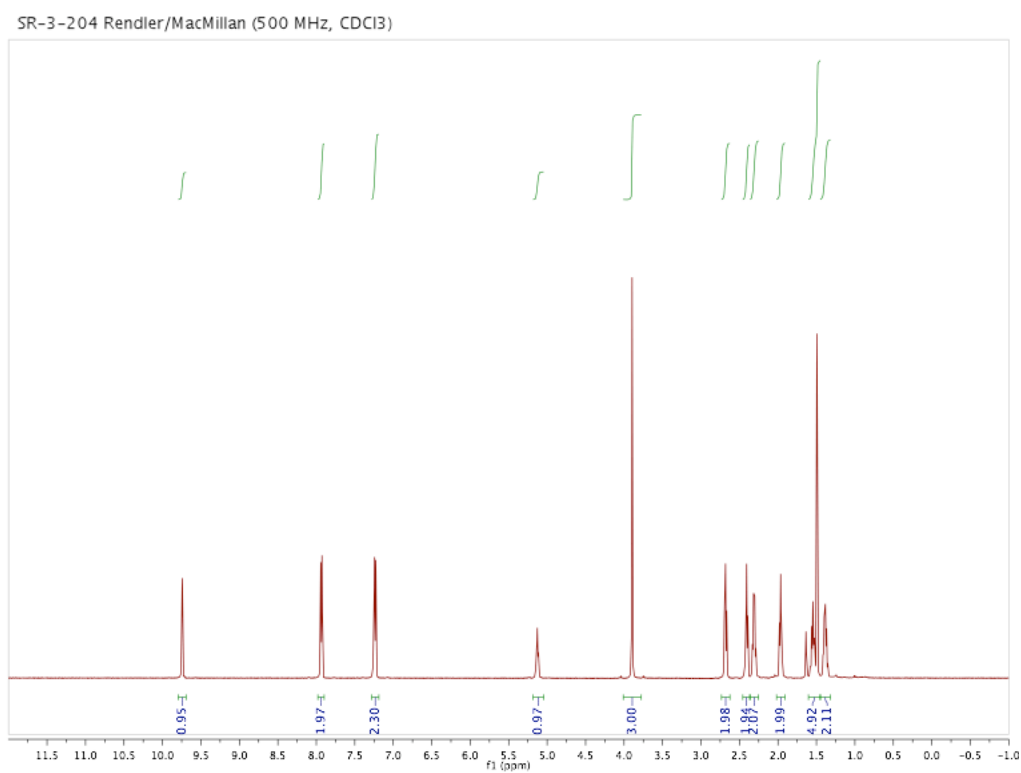

**21** ( $^{13}\text{C}$  NMR, 125 MHz,  $\text{CDCl}_3$ )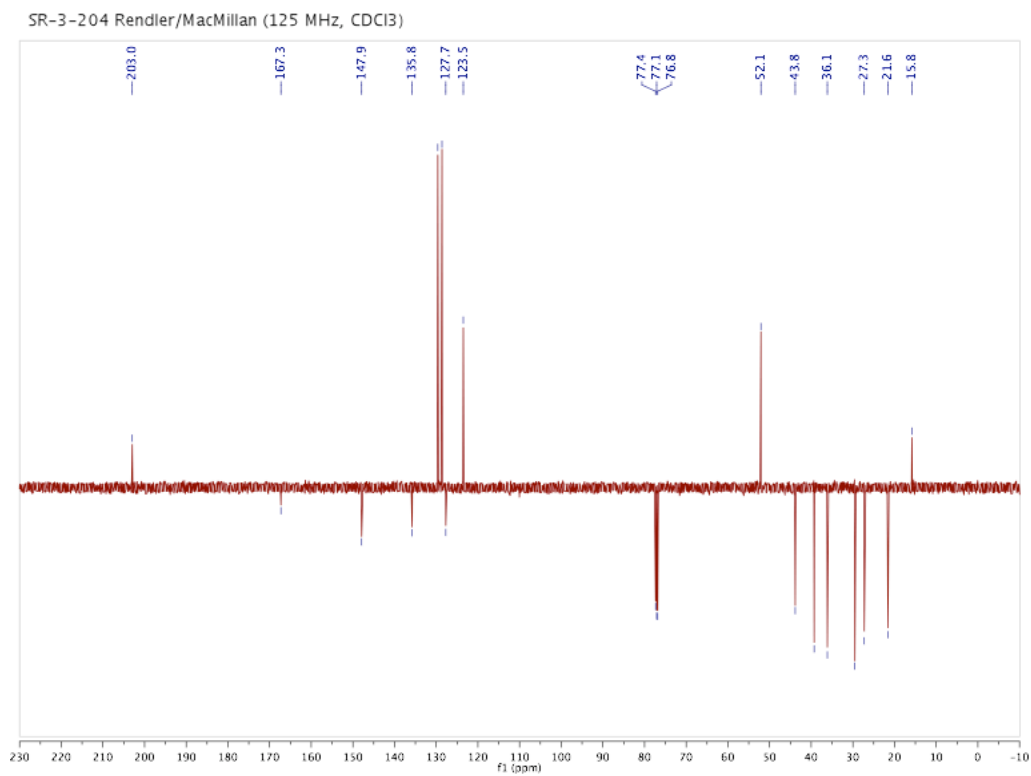**11** ( $^1\text{H}$  NMR, 500 MHz,  $\text{CDCl}_3$ )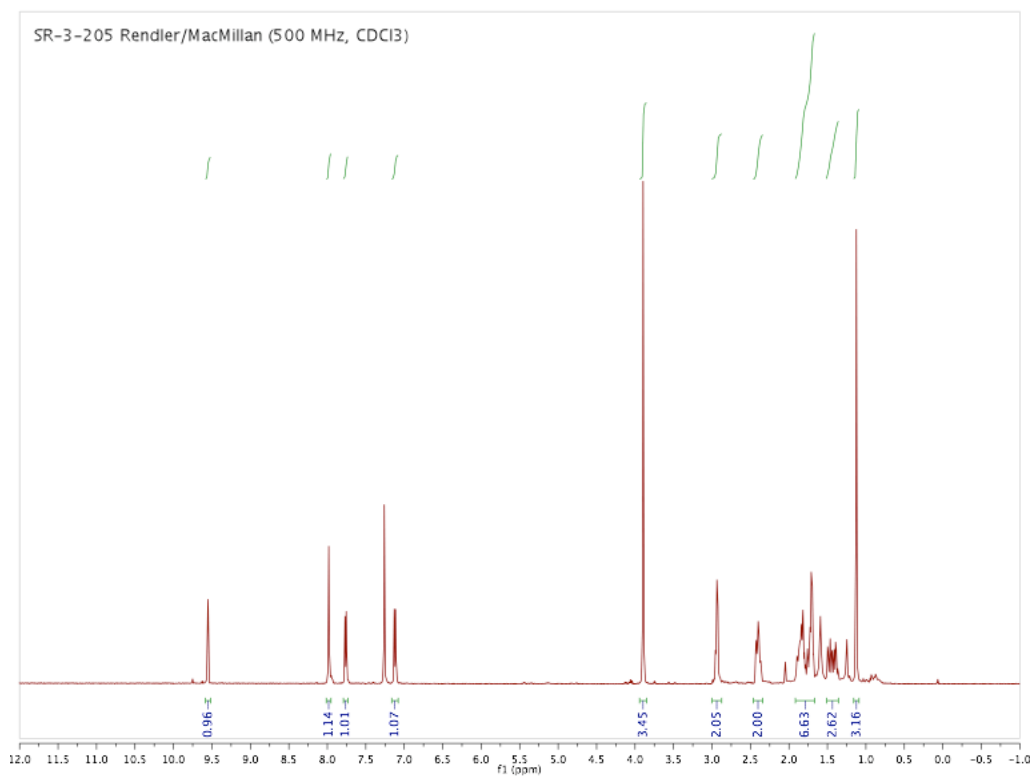

**11** ( $^{13}\text{C}$  NMR, 125 MHz,  $\text{CDCl}_3$ )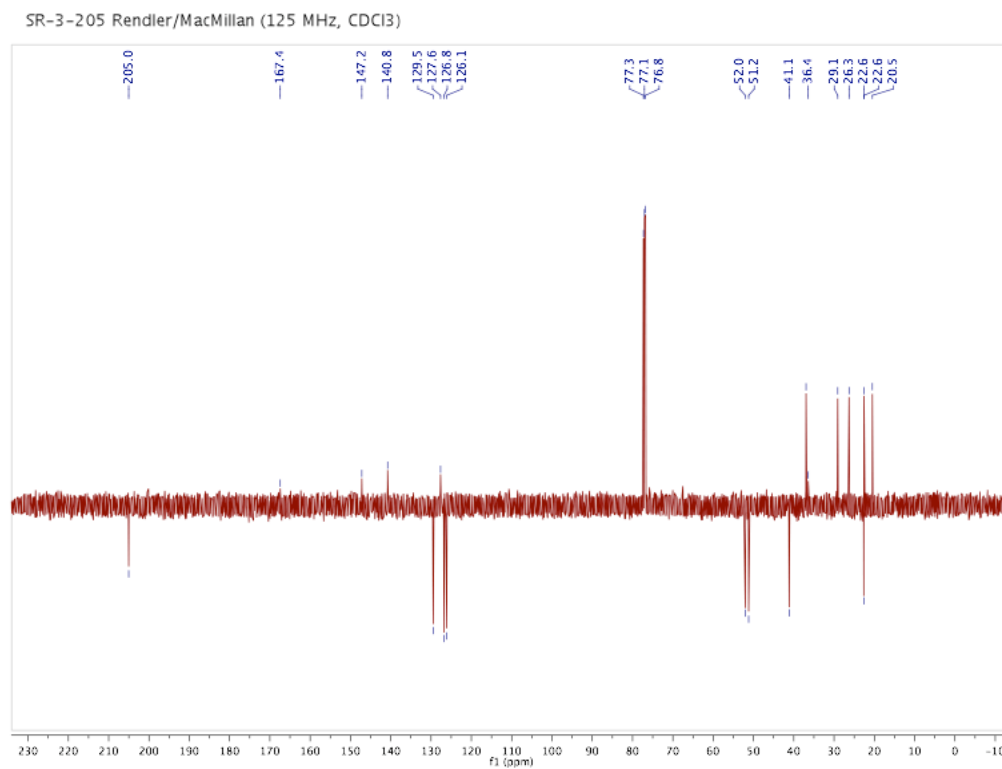1.6 Bicyclization to give aldehyde **12** (**22**  $\rightarrow$  **12**, Table 2)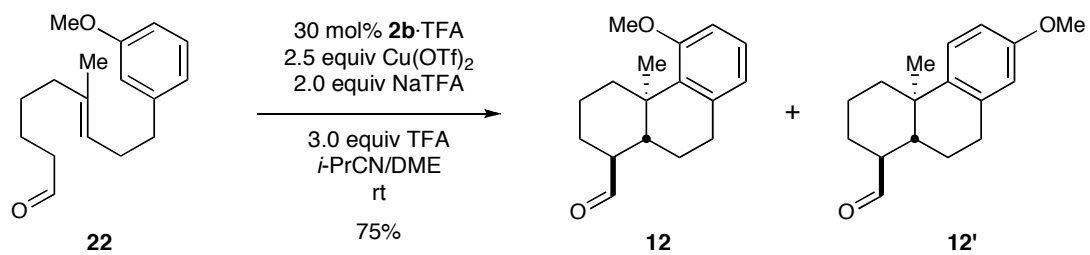

**22** ( $^1\text{H}$  NMR, 500 MHz,  $\text{CDCl}_3$ )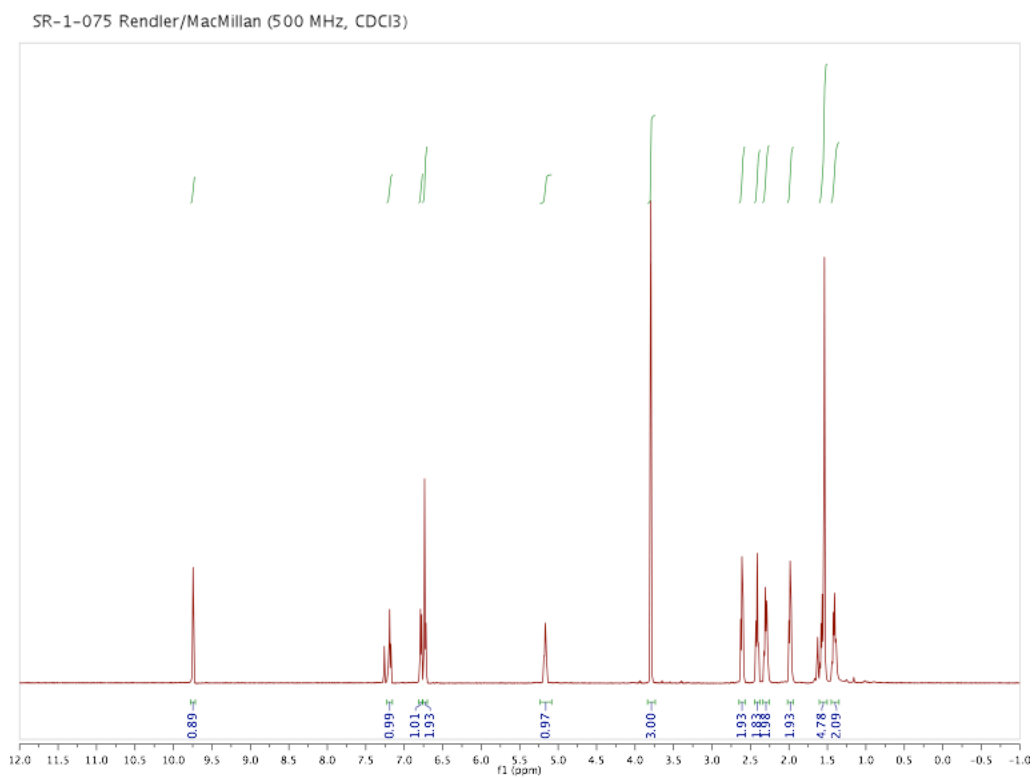**22** ( $^{13}\text{C}$  NMR, 125 MHz,  $\text{CDCl}_3$ )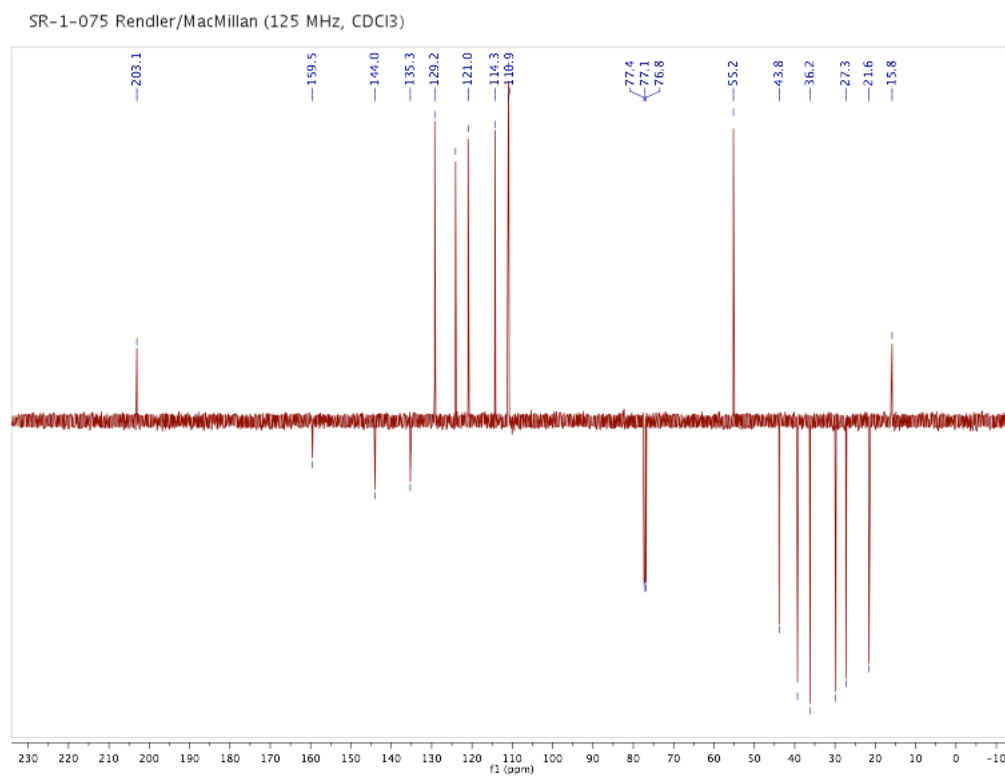

**12** ( $^1\text{H}$  NMR, 500 MHz,  $\text{CDCl}_3$ )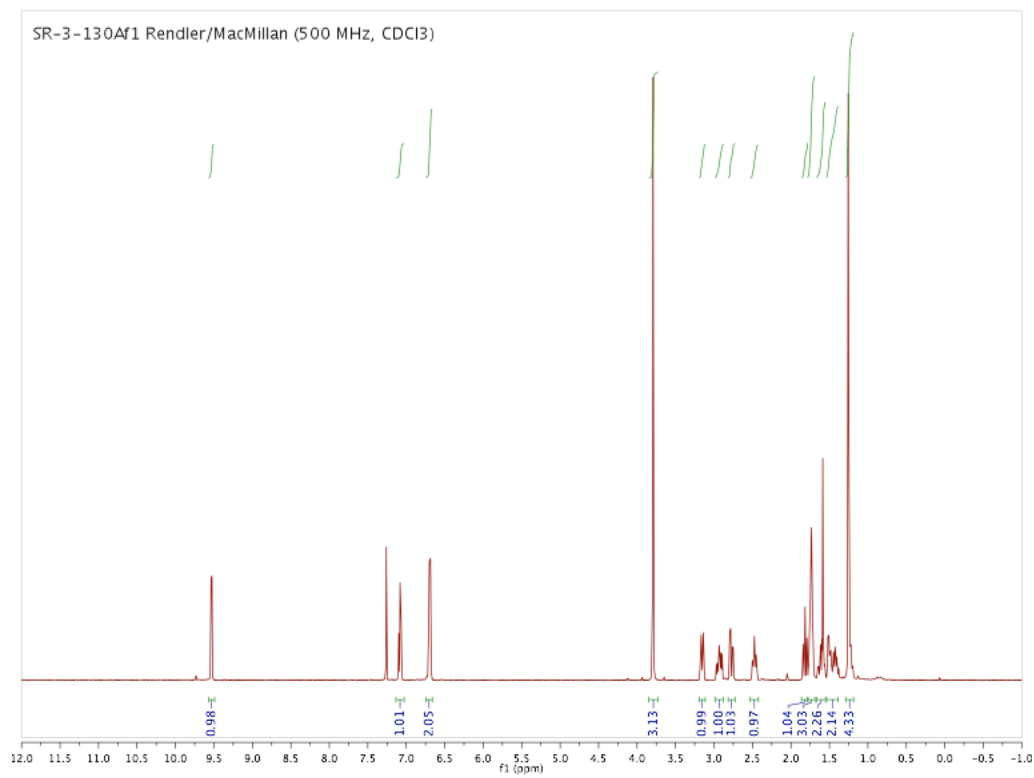**12** ( $^{13}\text{C}$  NMR, 125 MHz,  $\text{CDCl}_3$ )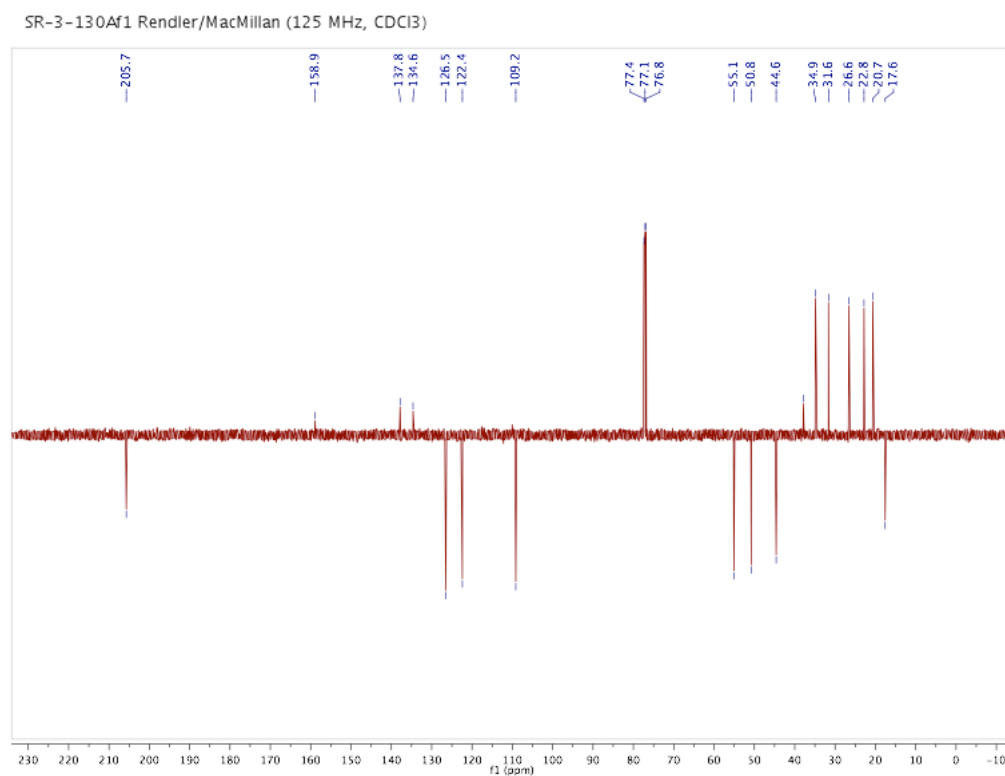

**12'** ( $^1\text{H}$  NMR, 500 MHz,  $\text{CDCl}_3$ )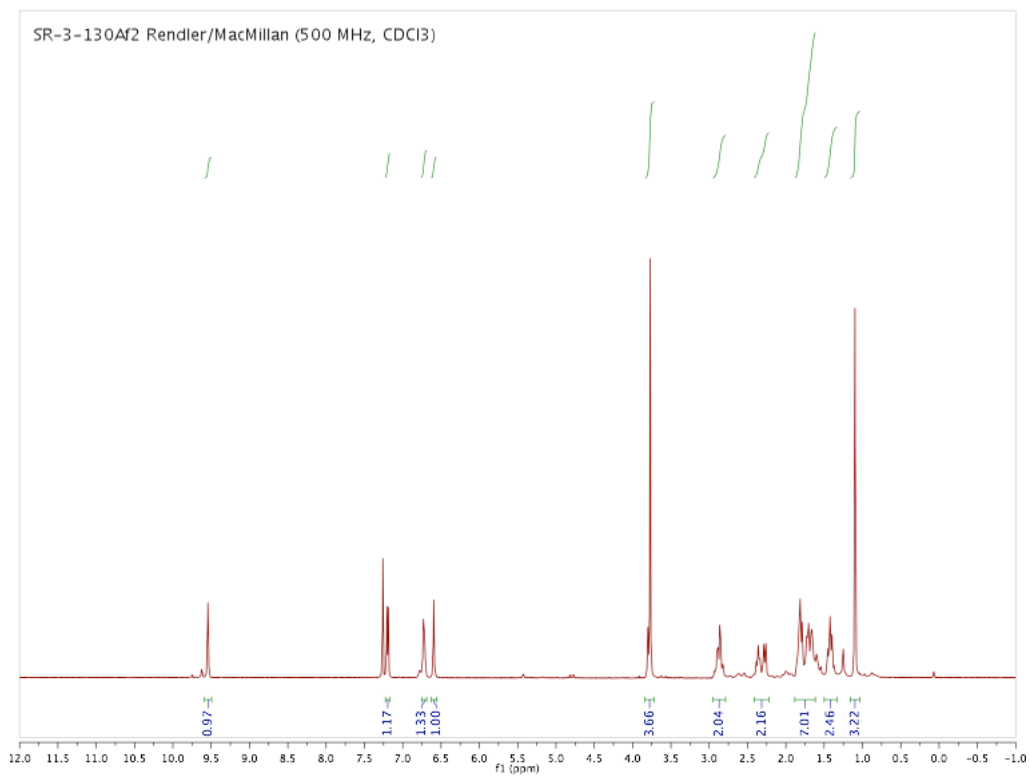**12'** ( $^{13}\text{C}$  NMR, 125 MHz,  $\text{CDCl}_3$ )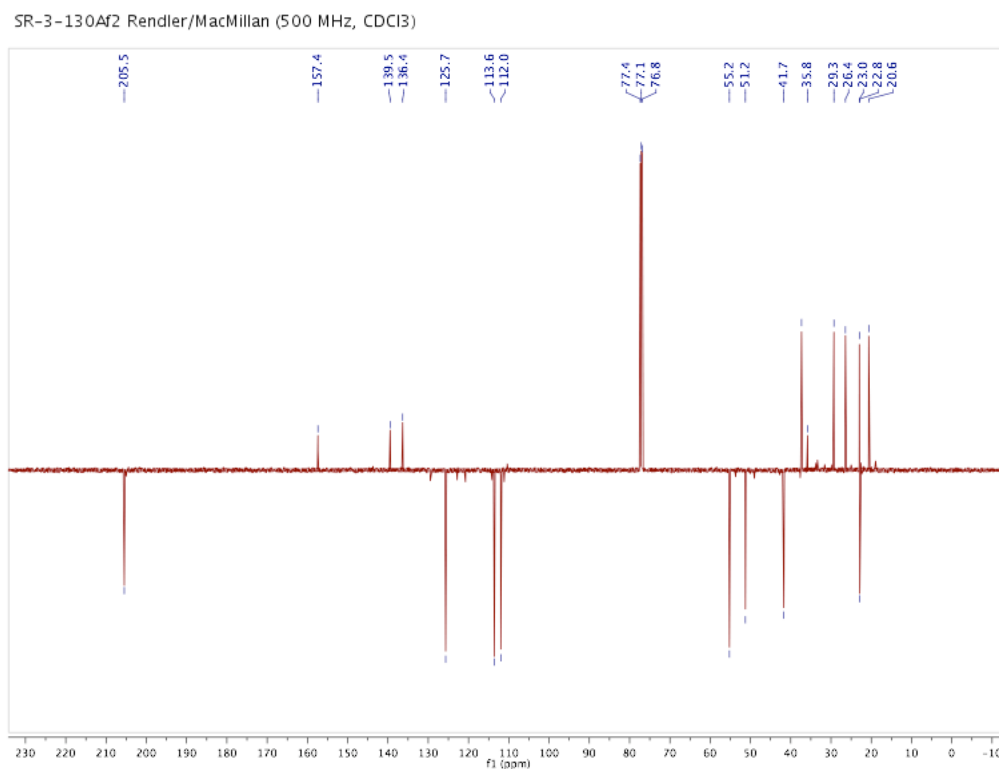

1.7 Tricyclization to give aldehyde **13** (**23** → **13**, Table 2)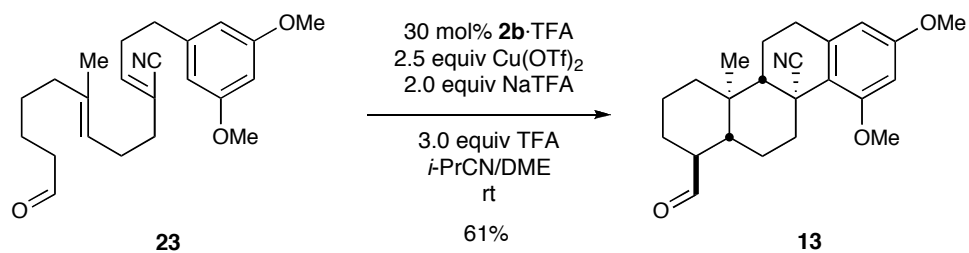**23** ( $^1\text{H NMR}$ , 500 MHz,  $\text{CDCl}_3$ )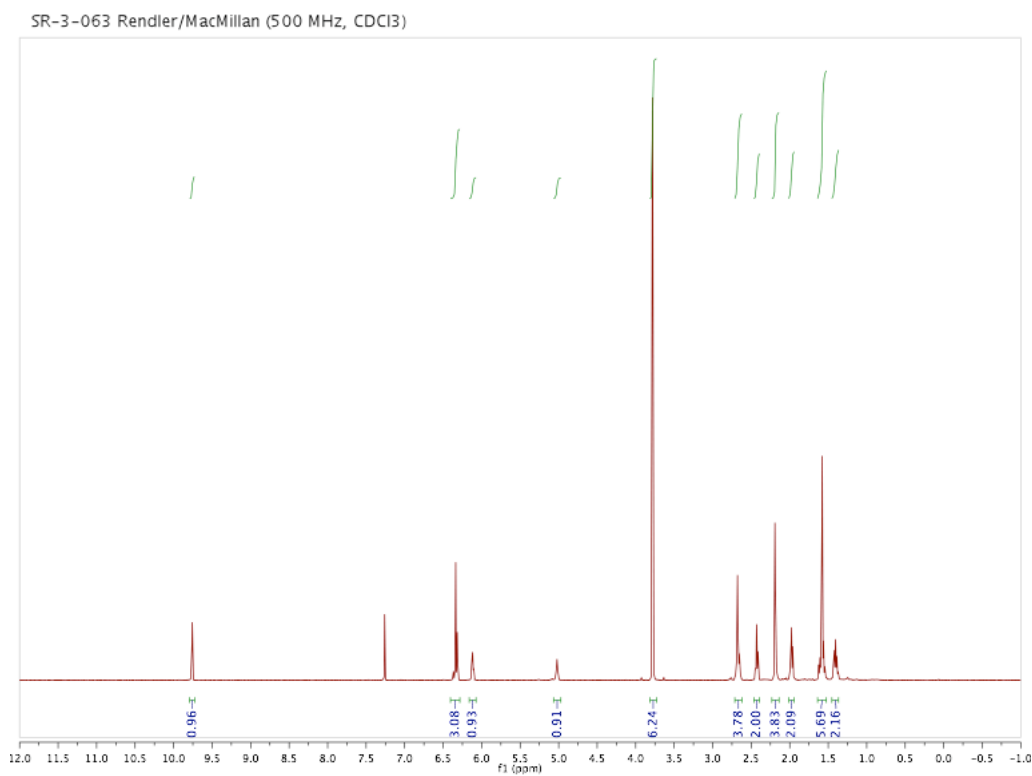



**23** ( $^{13}\text{C}$  NMR, 125 MHz,  $\text{CDCl}_3$ )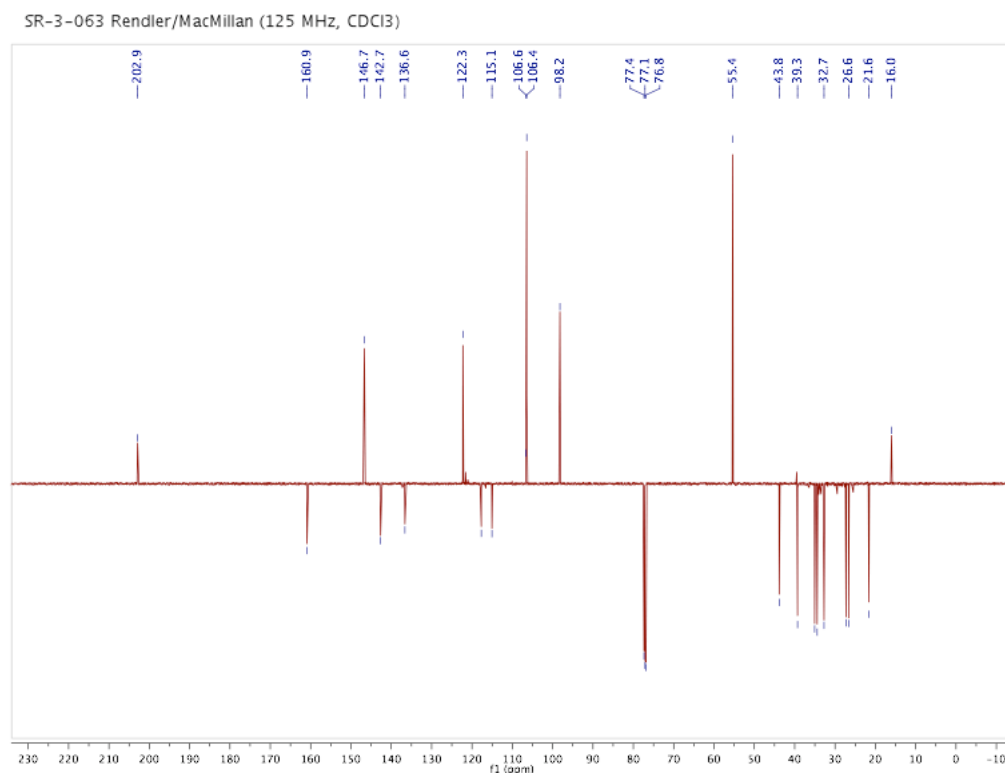**13** ( $^1\text{H}$  NMR, 500 MHz,  $\text{CDCl}_3$ )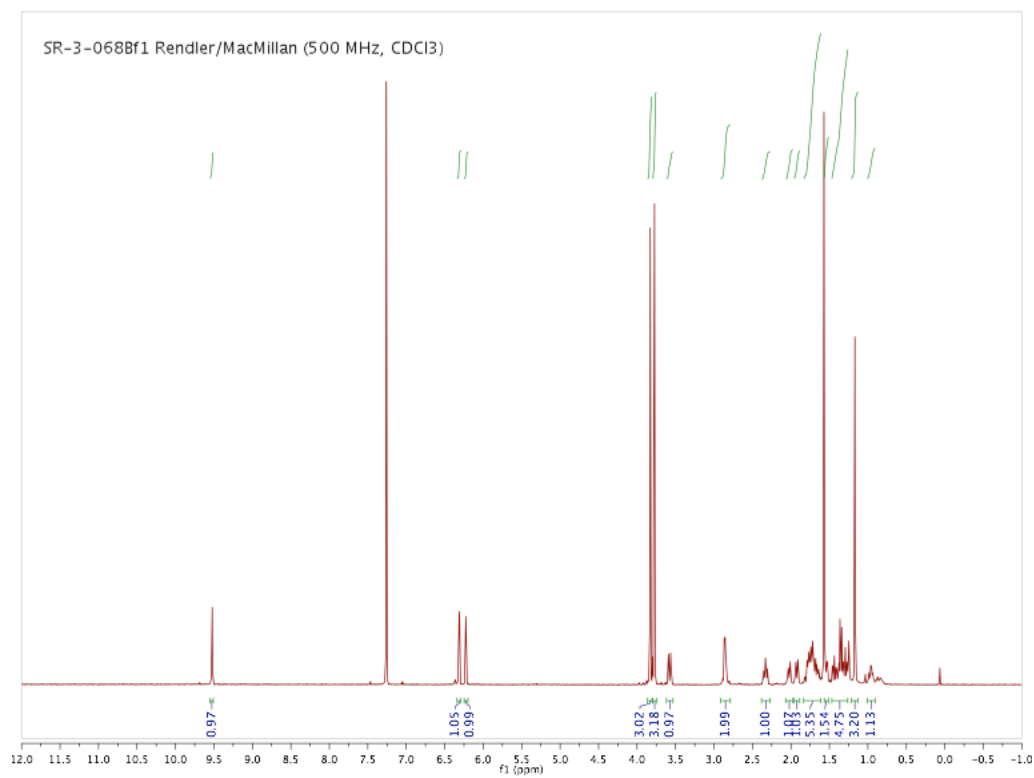

**13** ( $^{13}\text{C}$  NMR, 125 MHz,  $\text{CDCl}_3$ )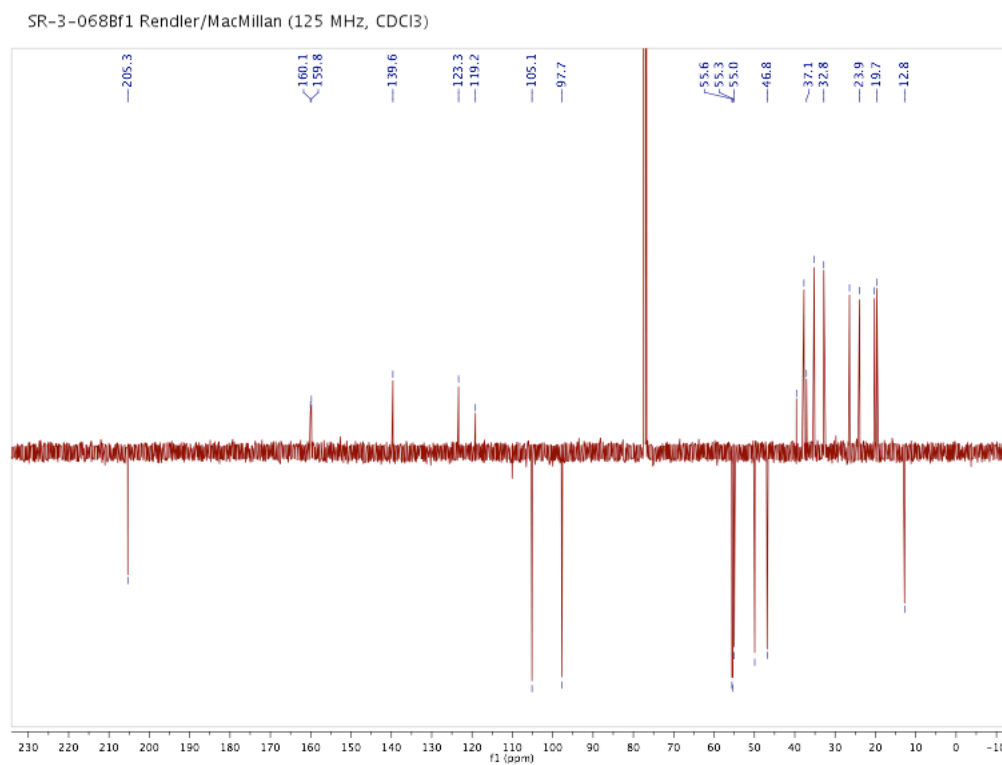1.8 Tricyclization to give aldehyde **14** (**24**  $\rightarrow$  **14**, Table 2)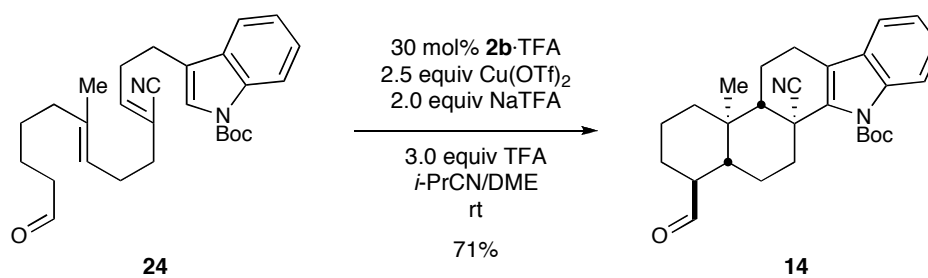

**24** ( $^1\text{H}$  NMR, 500 MHz,  $\text{CDCl}_3$ )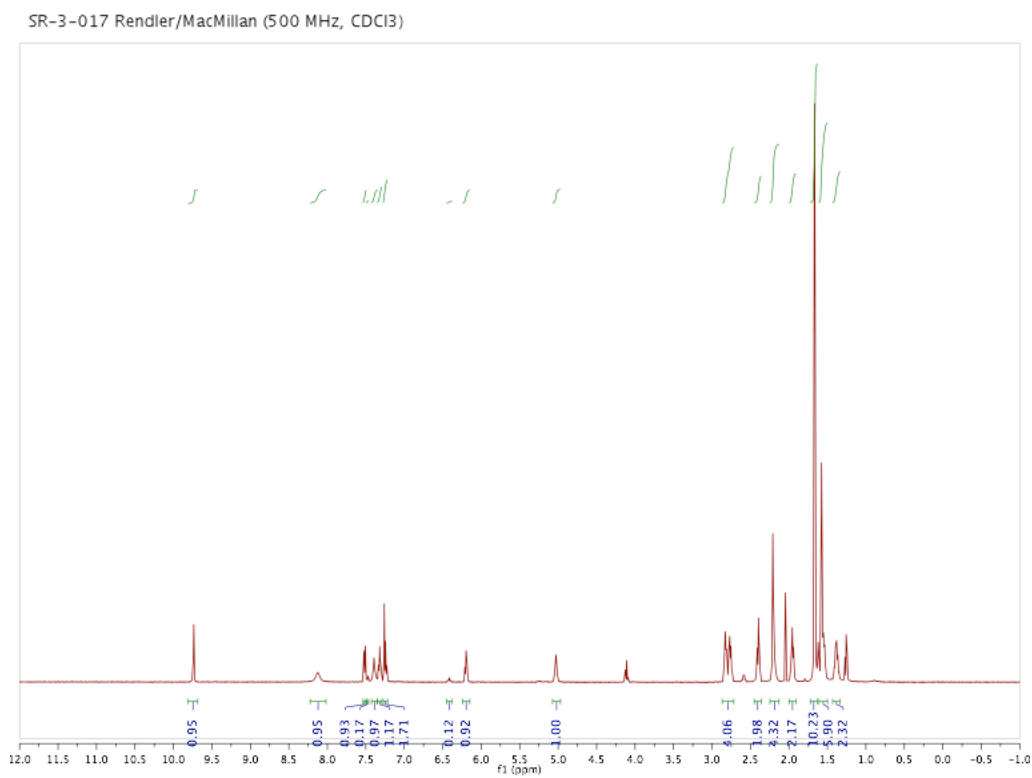**24** ( $^{13}\text{C}$  NMR, 125 MHz,  $\text{CDCl}_3$ )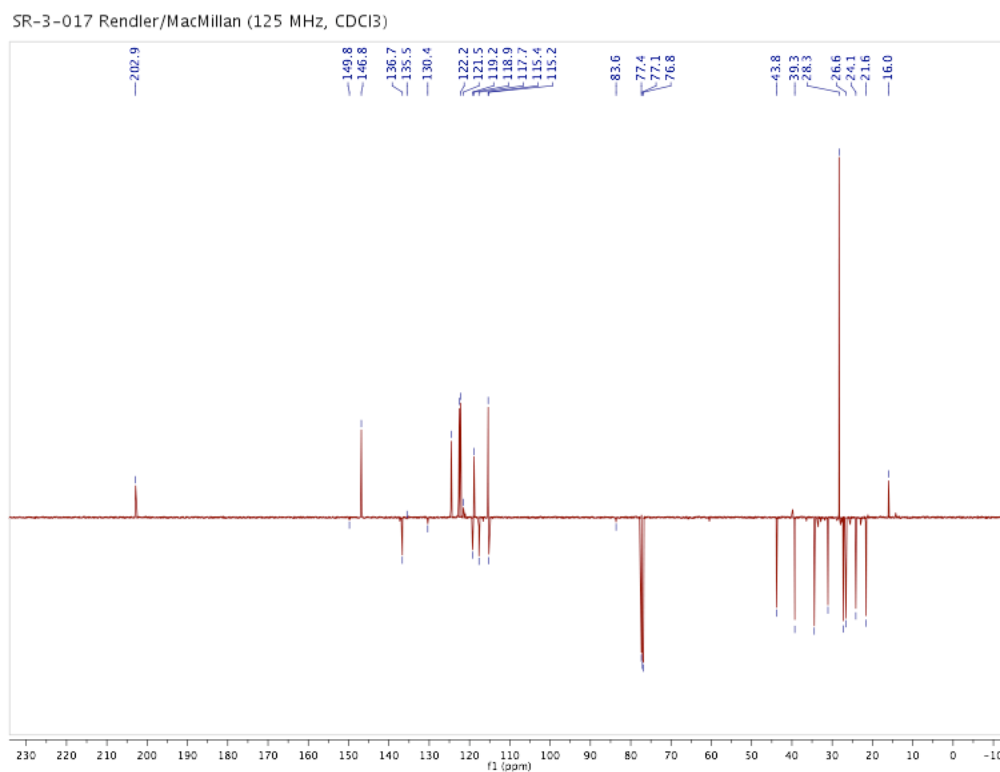

**14** ( $^1\text{H}$  NMR, 500 MHz,  $\text{CDCl}_3$ )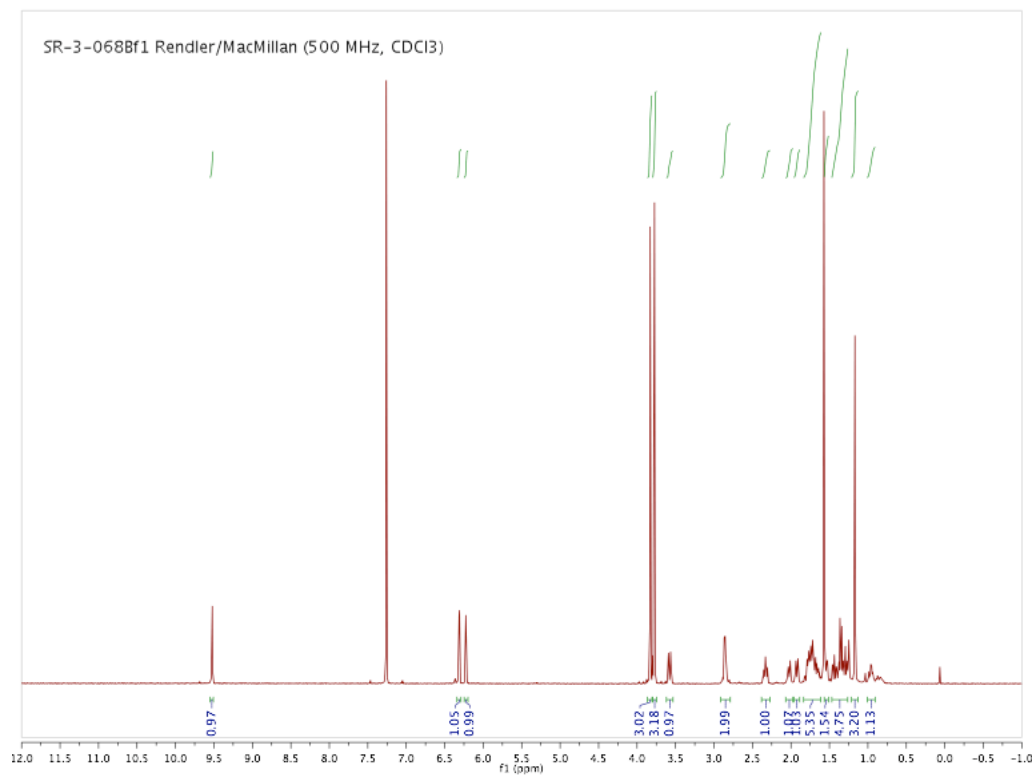**14** ( $^{13}\text{C}$  NMR, 125 MHz,  $\text{CDCl}_3$ )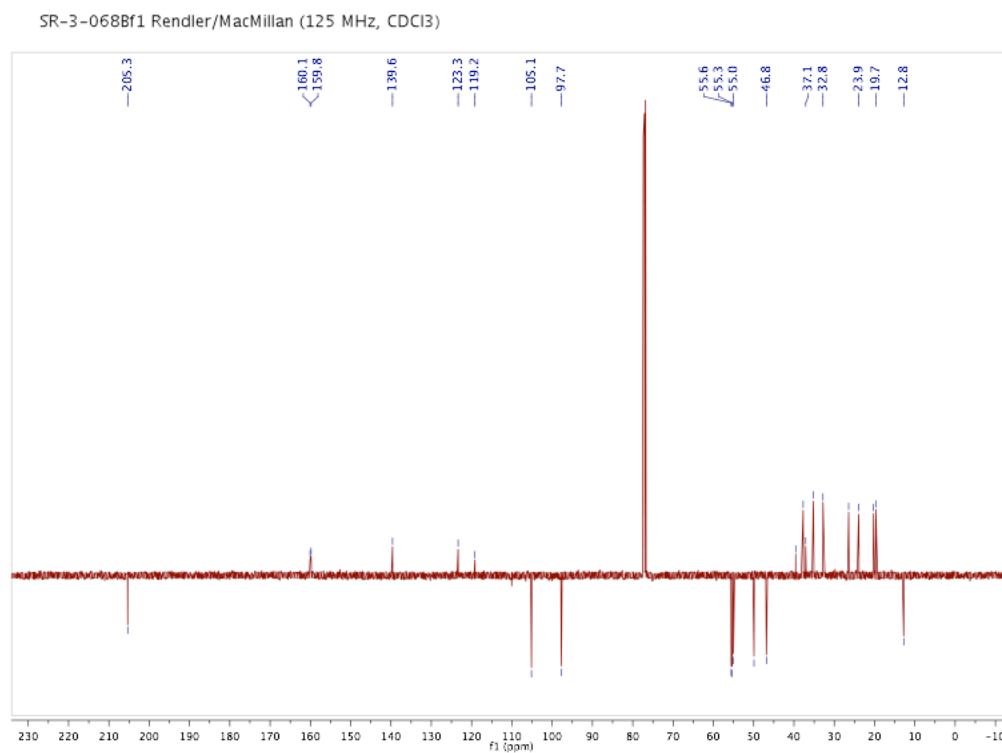

1.9 Bicyclization to give aldehyde **15** (**25** → **15**, Table 2)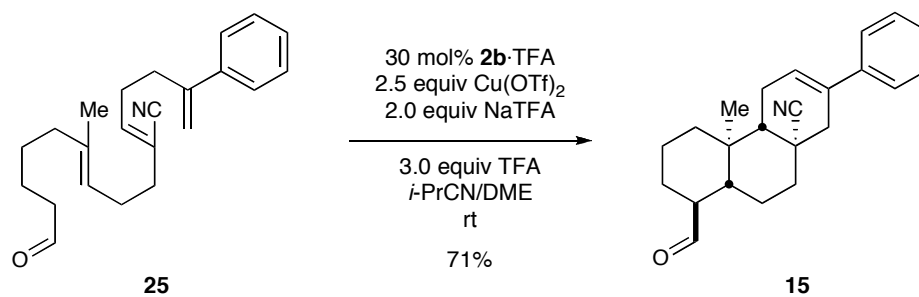**25** (<sup>1</sup>H NMR, 500 MHz, CDCl<sub>3</sub>)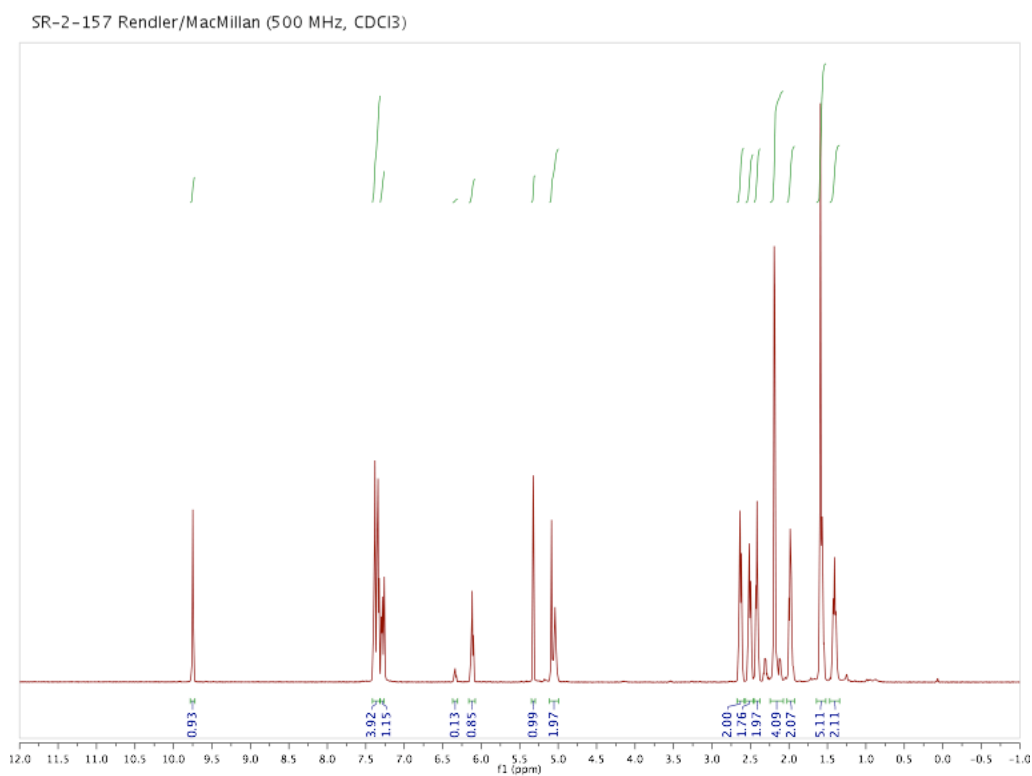

**25** ( $^{13}\text{C}$  NMR, 125 MHz,  $\text{CDCl}_3$ )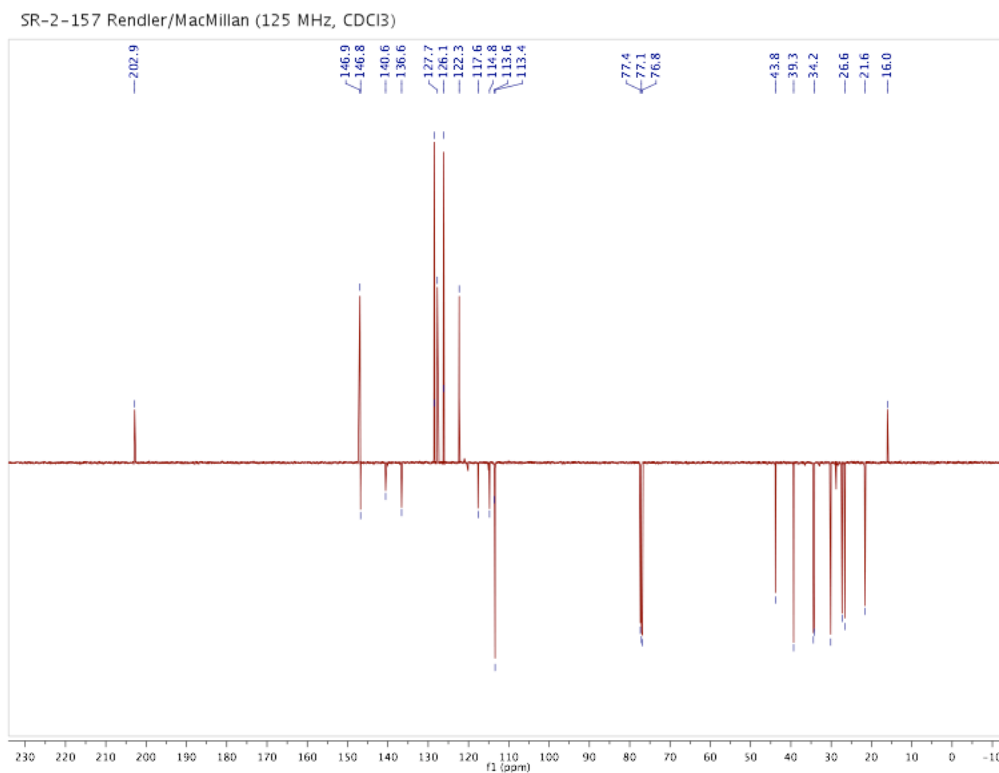**15** ( $^1\text{H}$  NMR, 500 MHz,  $\text{CDCl}_3$ )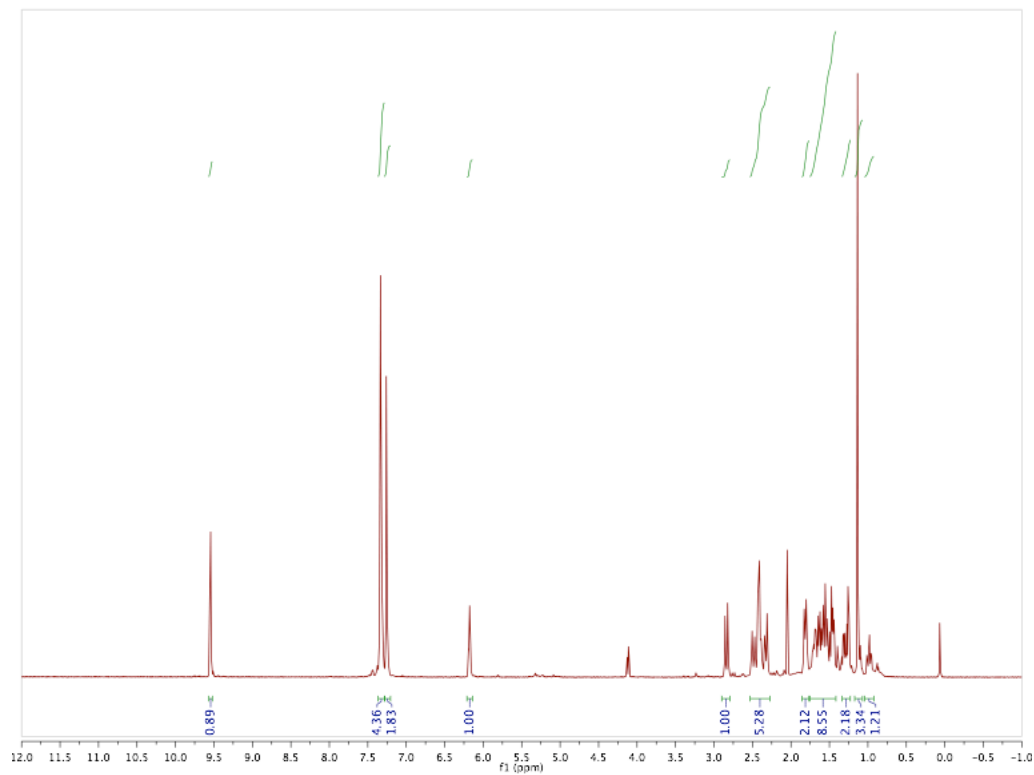

**15** ( $^{13}\text{C}$  NMR, 125 MHz,  $\text{CDCl}_3$ )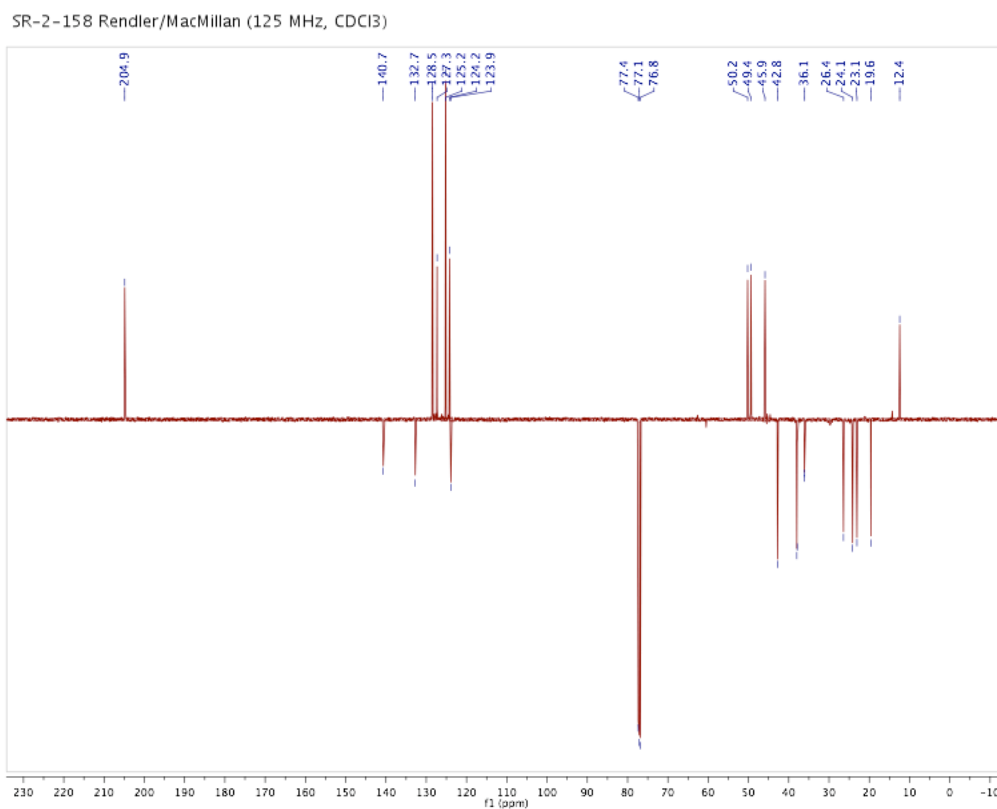1.10 Tetracyclization to give aldehyde **5** (**1**  $\rightarrow$  **5**, Scheme 2)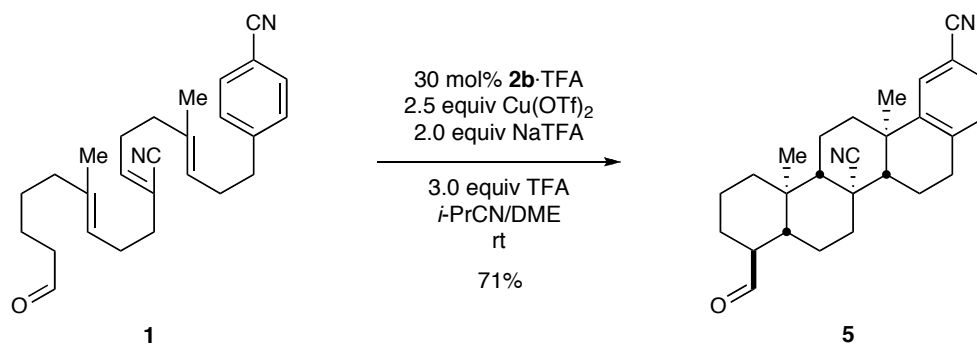

**1** ( $^1\text{H}$  NMR, 500 MHz,  $\text{CDCl}_3$ )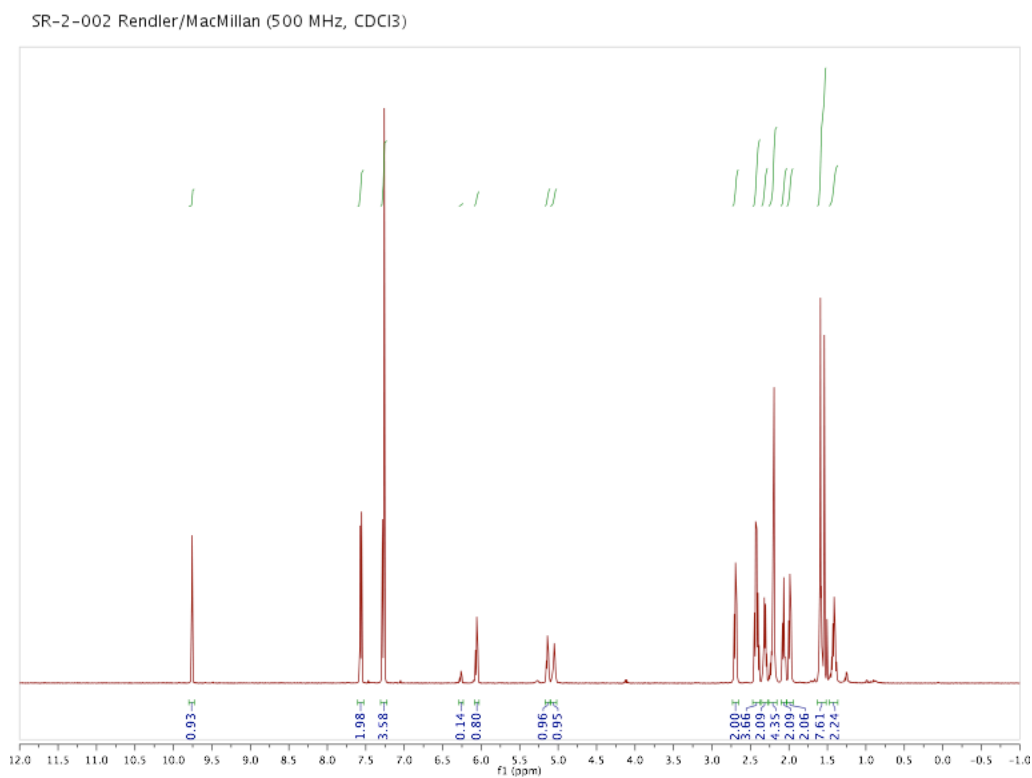**1** ( $^{13}\text{C}$  NMR, 125 MHz,  $\text{CDCl}_3$ )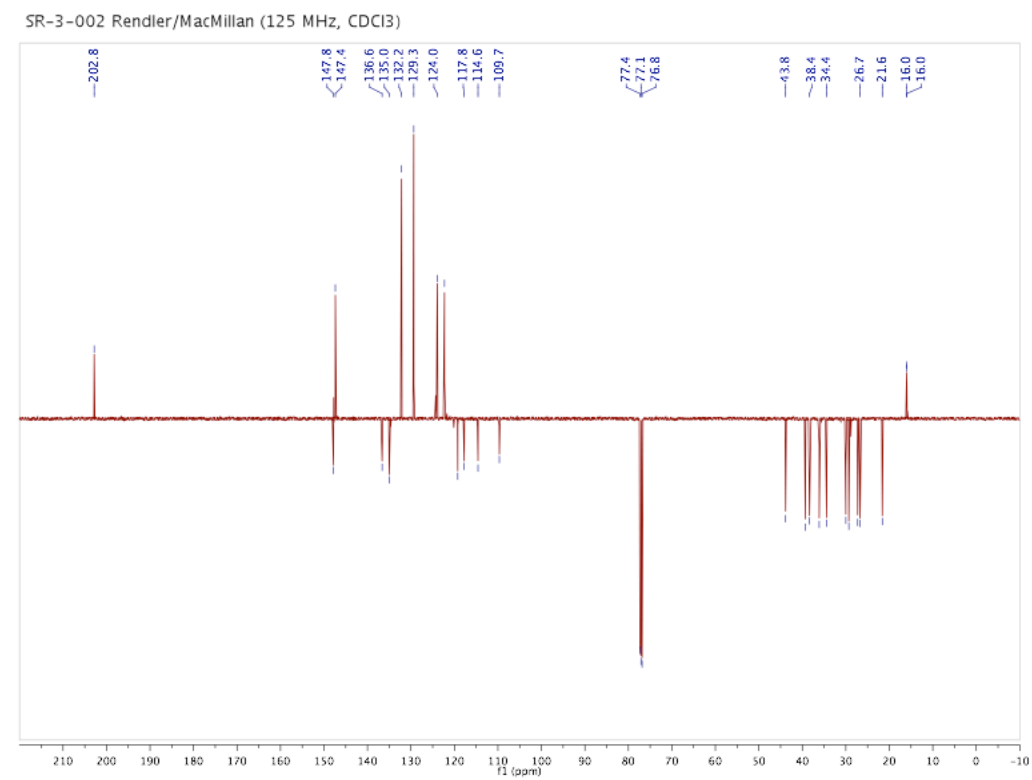



**5** ( $^1\text{H}$  NMR, 500 MHz,  $\text{CDCl}_3$ )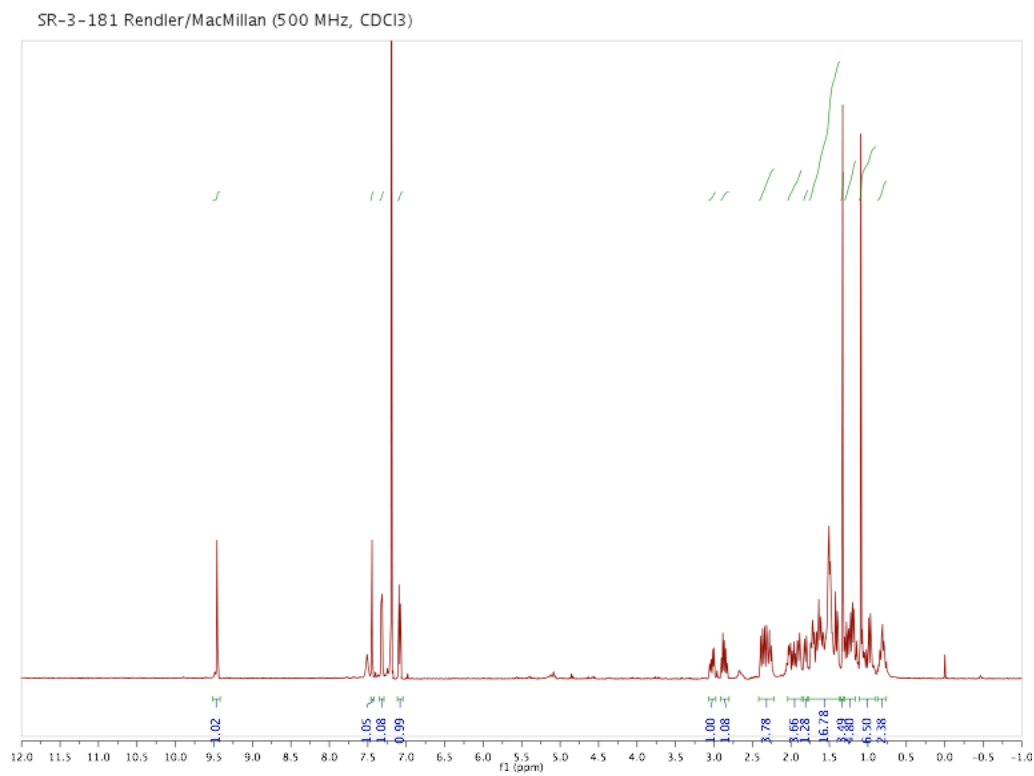**5** ( $^{13}\text{C}$  NMR, 125 MHz,  $\text{CDCl}_3$ )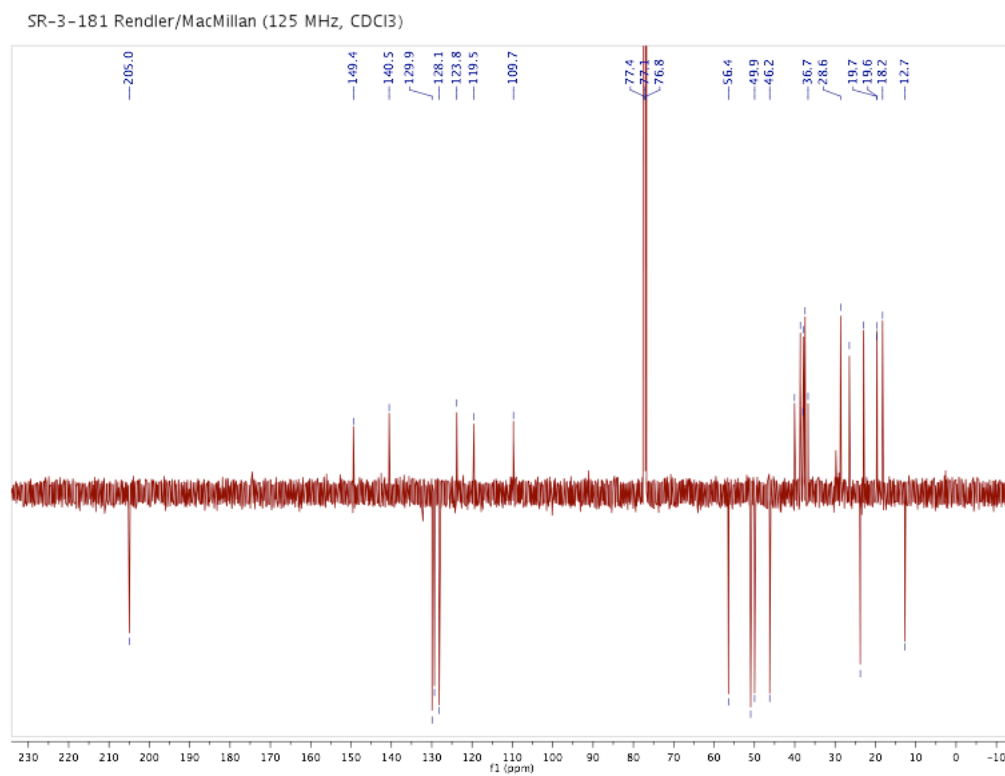

1.11 Pentacyclization to give aldehyde **16** (**26** → **16**, Scheme 2)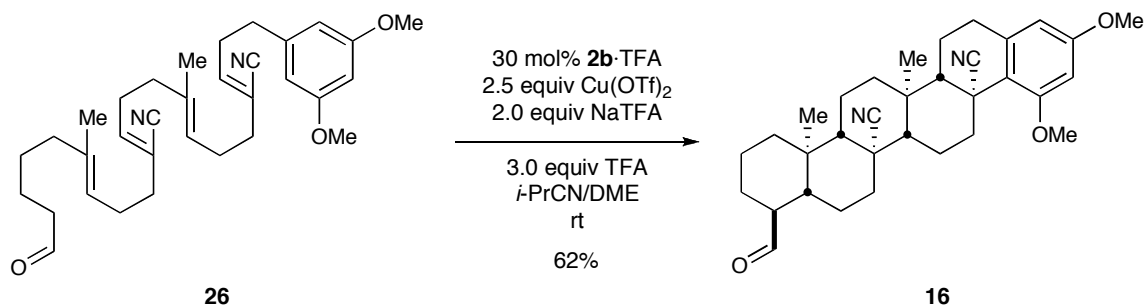**26** (<sup>1</sup>H NMR, 500 MHz, CDCl<sub>3</sub>)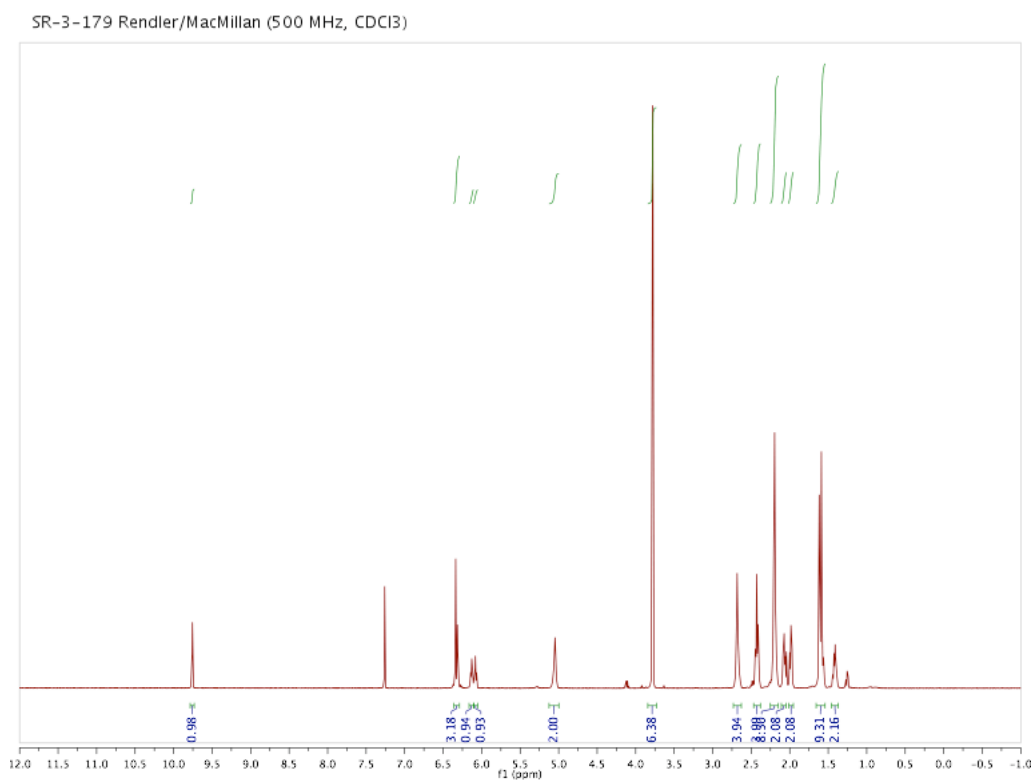

**26** ( $^{13}\text{C}$  NMR, 125 MHz,  $\text{CDCl}_3$ )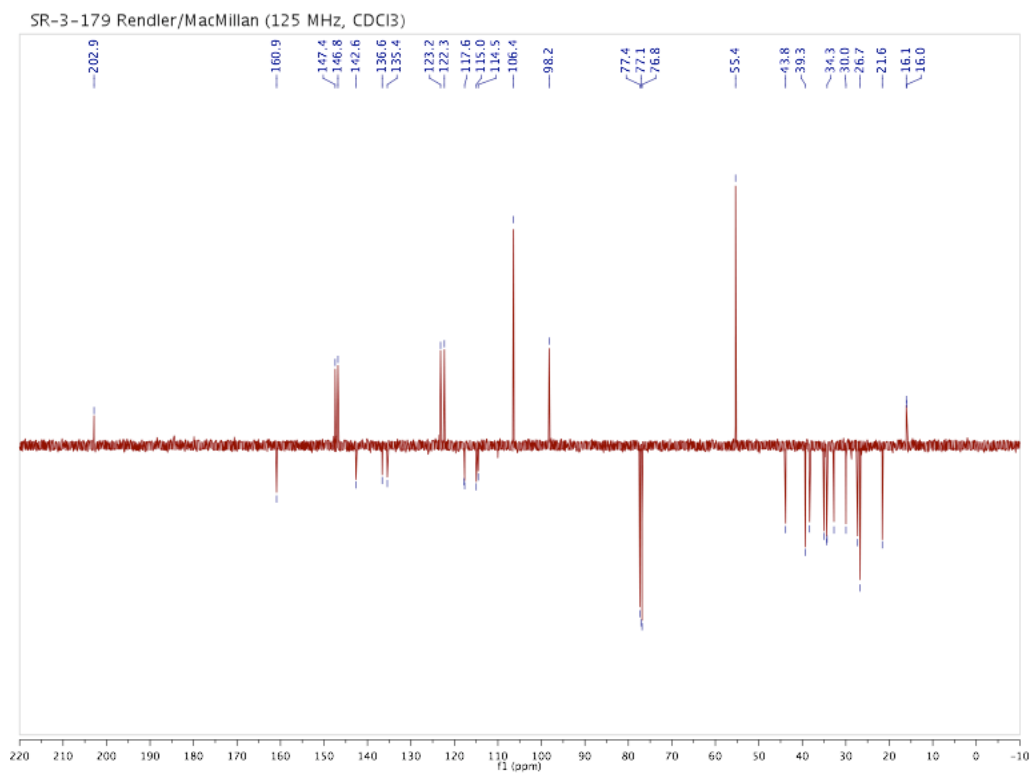**16** ( $^1\text{H}$  NMR, 500 MHz,  $\text{CDCl}_3$ )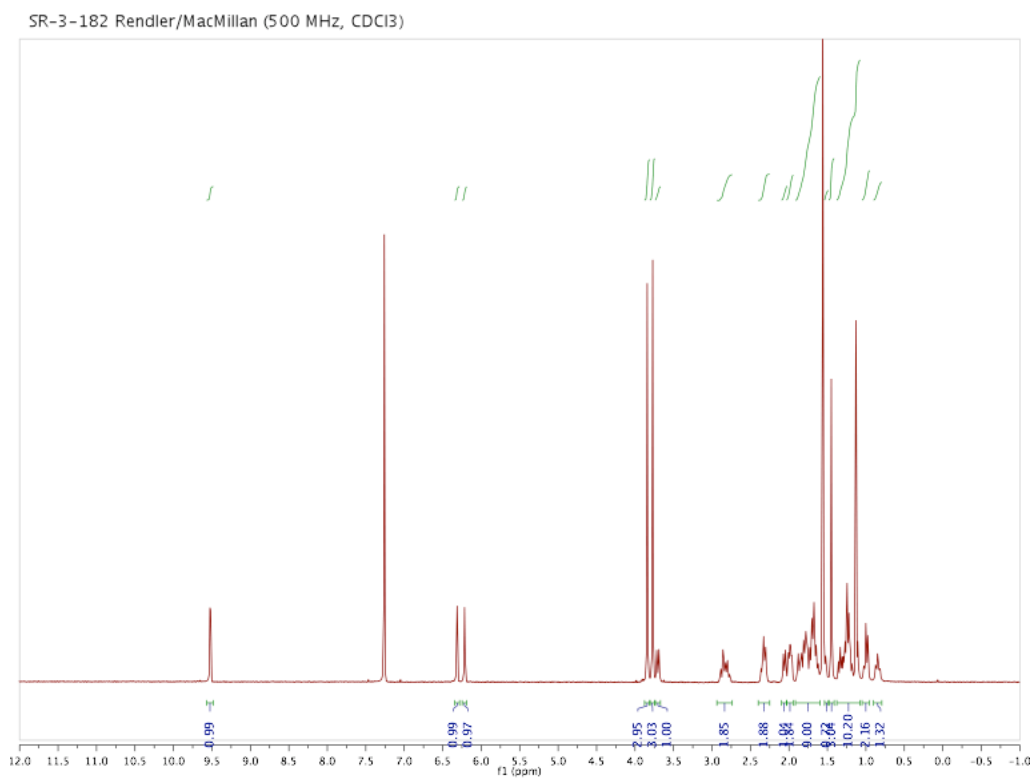

16 ( $^{13}\text{C}$  NMR, 125 MHz,  $\text{CDCl}_3$ )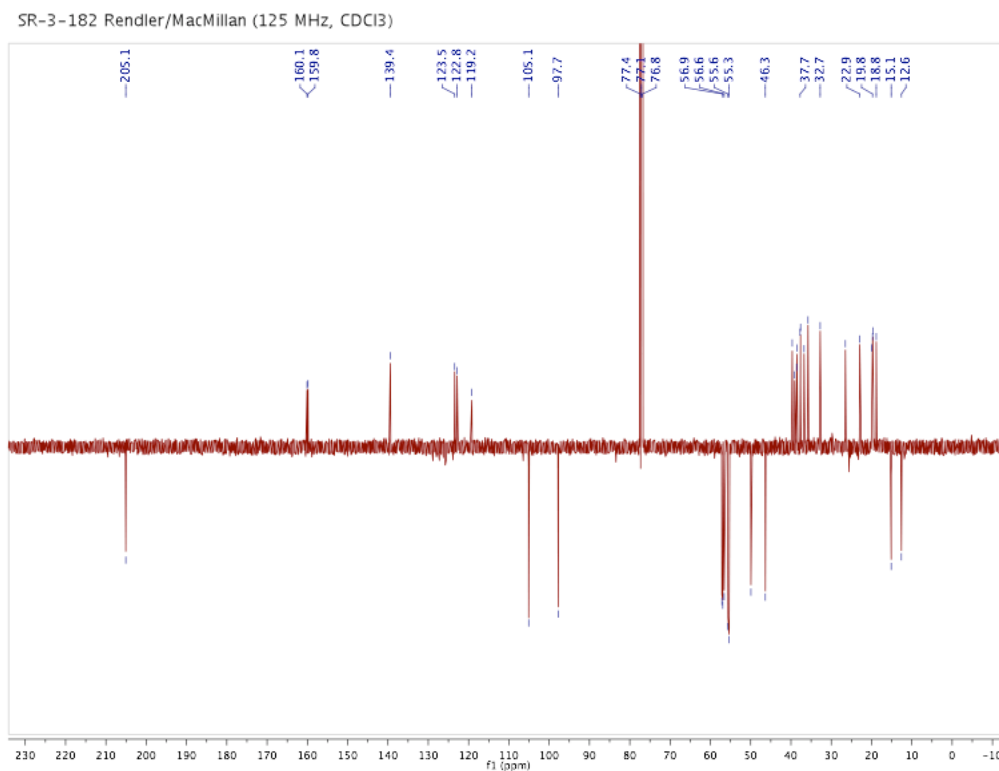1.12 Hexacyclization to give aldehyde **17** (**27**  $\rightarrow$  **17**, Scheme 2)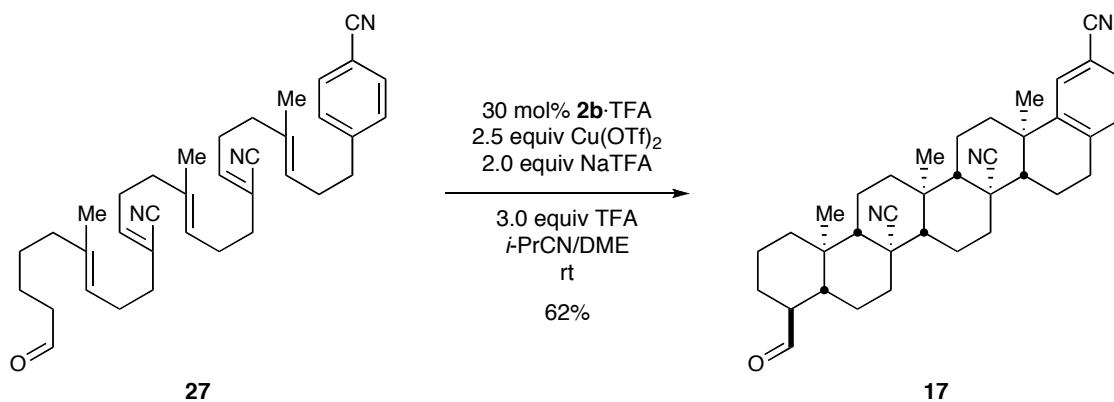

**27** ( $^1\text{H}$  NMR, 500 MHz,  $\text{CDCl}_3$ )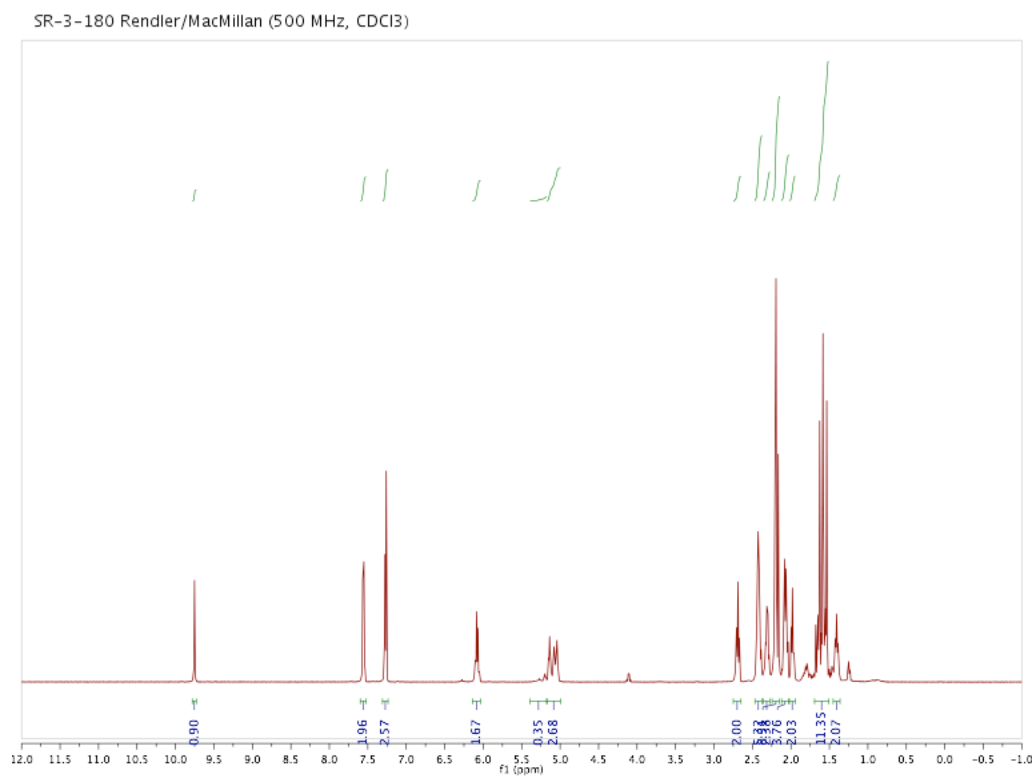**27** ( $^{13}\text{C}$  NMR, 125 MHz,  $\text{CDCl}_3$ )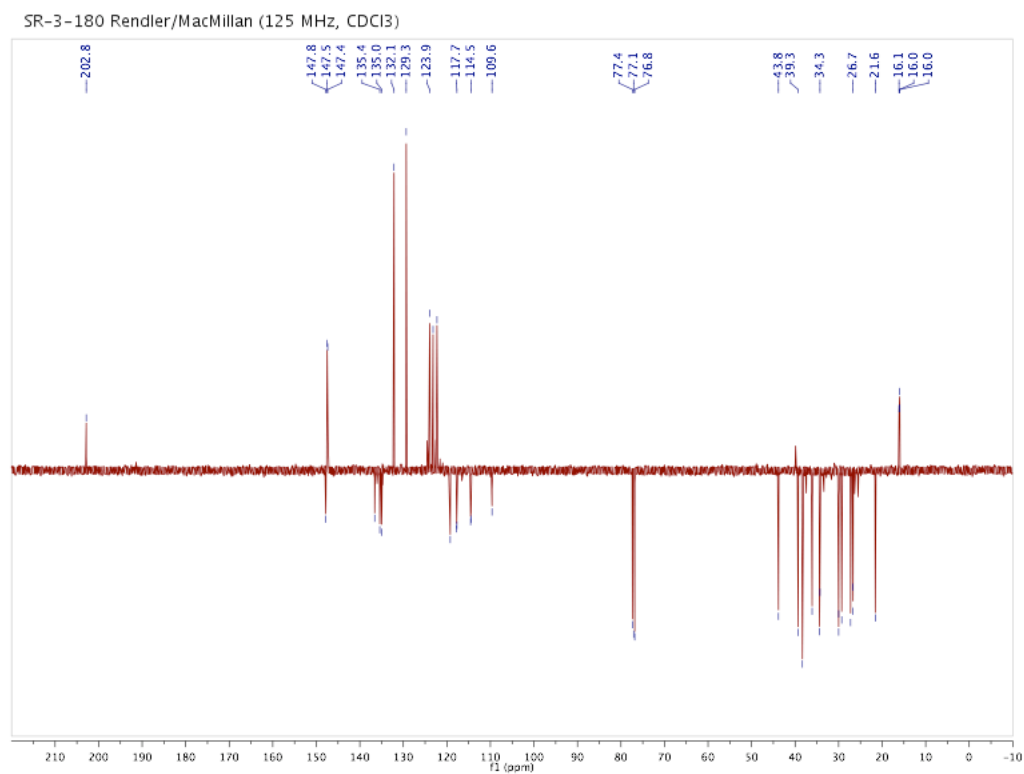

**17** ( $^1\text{H}$  NMR, 500 MHz,  $\text{CDCl}_3$ )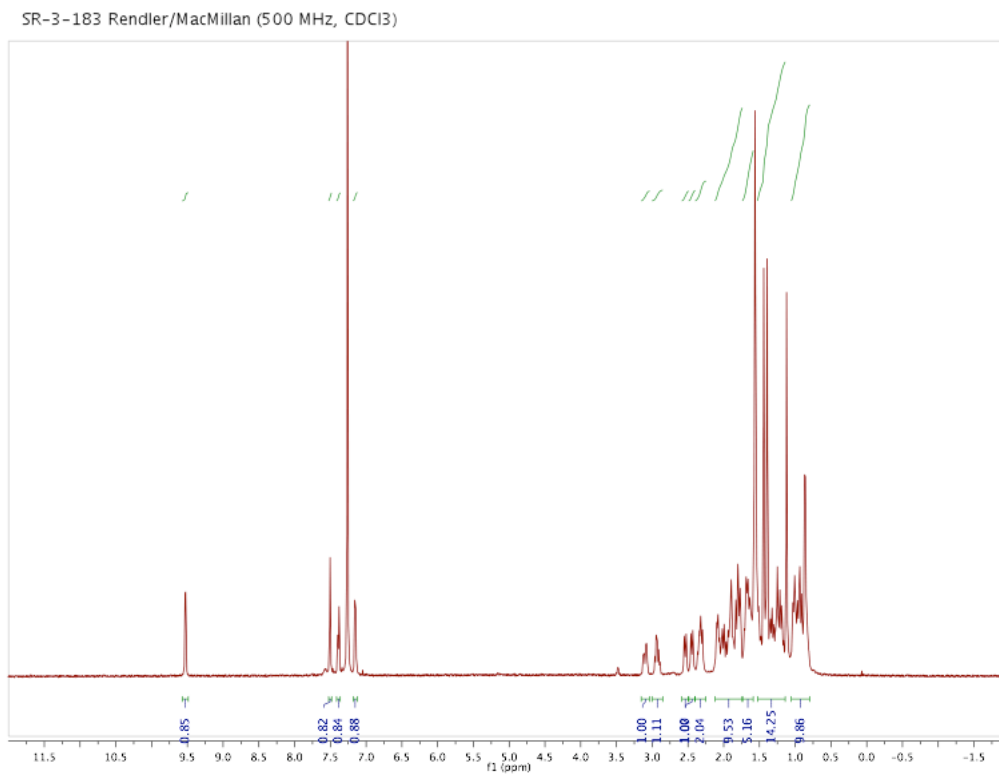**17** ( $^{13}\text{C}$  NMR, 125 MHz,  $\text{CDCl}_3$ )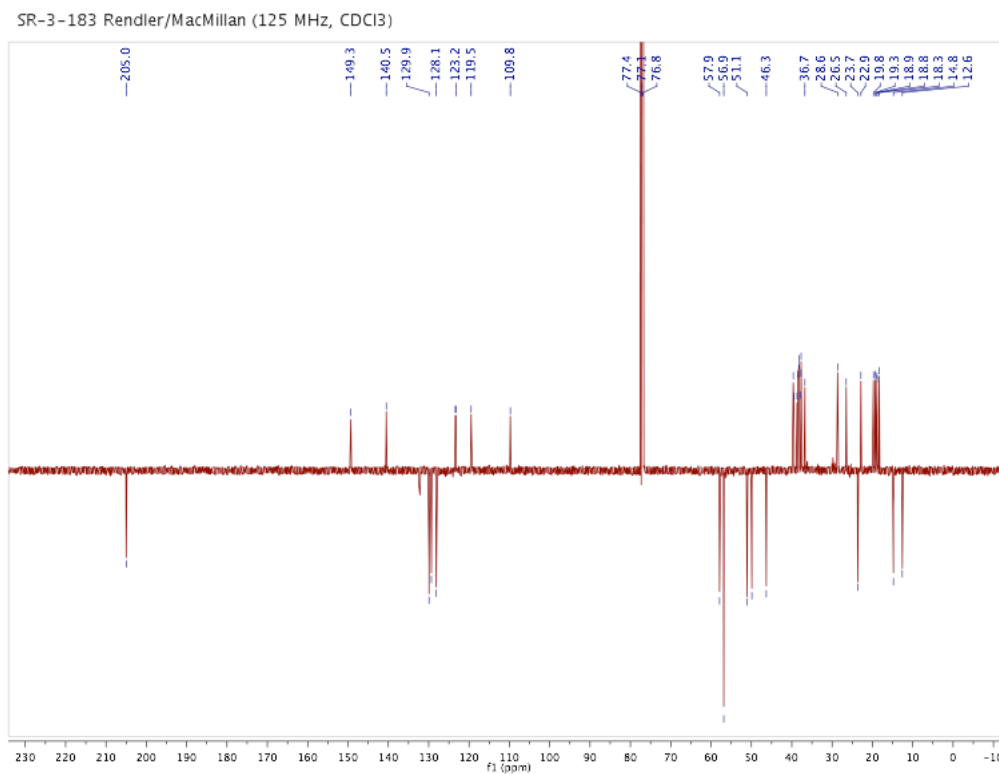

## 2 Copies of HPLC Traces of Products 5, 7-16

Data File C:\HPCHEM\2\DATA\SR\SR3168A.D

Sample Name: sr-3-168a

```

=====
Injection Date   : 7/29/2009 5:44:19 PM      Seq. Line :    4
Sample Name     : sr-3-168a                 Location  : Vial 91
Acq. Operator   : Sebastian                  Inj       :    1
Acq. Instrument : Instrument 2               Inj Volume: 5 µl
Acq. Method     : C:\HPCHEM\2\METHODS\2IPA30.M
Last changed    : 7/28/2009 5:49:29 PM by Anna
Analysis Method : C:\HPCHEM\2\METHODS\2IPA40.M
Last changed    : 7/29/2009 5:01:49 PM by Anna
                  (modified after loading)
=====

```

2% IPA @ 230 nm

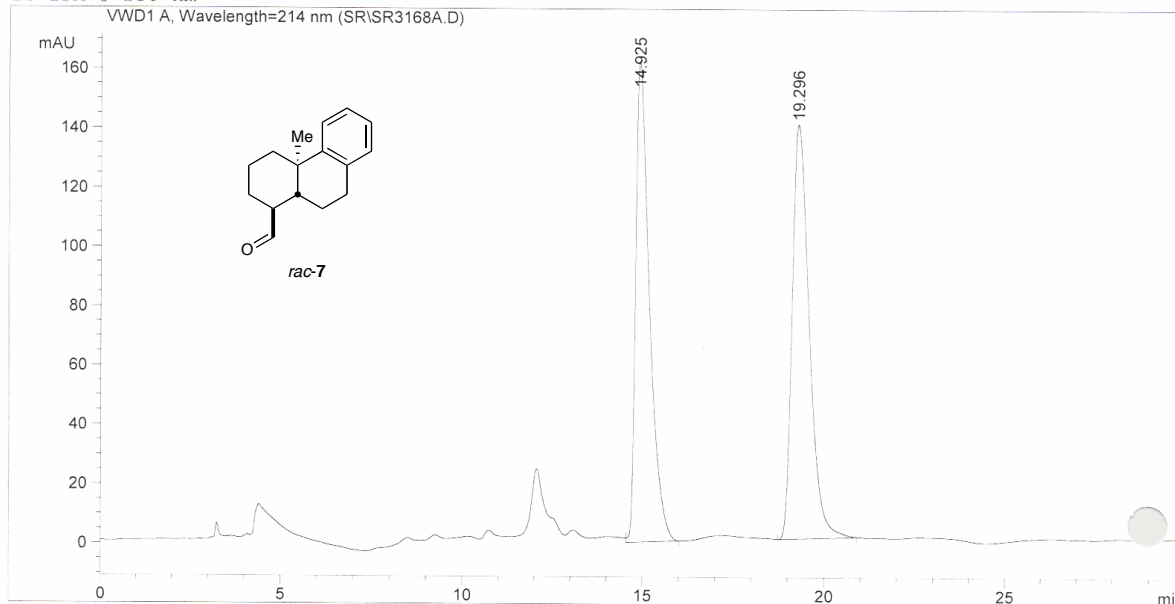

### Area Percent Report

```

=====
Sorted By       : Signal
Multiplier     : 1.0000
Dilution       : 1.0000
Use Multiplier & Dilution Factor with ISTDs
=====

```

Signal 1: VWD1 A, Wavelength=214 nm

| Peak # | RetTime [min] | Type | Width [min] | Area mAU *s | Height [mAU] | Area %  |
|--------|---------------|------|-------------|-------------|--------------|---------|
| 1      | 14.925        | VB   | 0.3908      | 4276.78516  | 162.11777    | 48.6079 |
| 2      | 19.296        | VB   | 0.4974      | 4521.75537  | 139.57542    | 51.3921 |

Totals : 8798.54053 301.69319

Results obtained with enhanced integrator!

```

=====
*** End of Report ***
=====

```

Data File C:\HPCHEM\2\DATA\SR\SR3130E.D

Sample Name: sr-3-130b

```

=====
Injection Date   : 7/29/2009 6:15:52 PM      Seq. Line   :    5
Sample Name     : sr-3-130b                 Location    : Vial 92
Acq. Operator   : Sebastian                 Inj         :    1
Acq. Instrument : Instrument 2              Inj Volume  : 5 µl
Acq. Method     : C:\HPCHEM\2\METHODS\2IPA30.M
Last changed    : 7/28/2009 5:49:29 PM by Anna
Analysis Method : C:\HPCHEM\2\METHODS\2IPA40.M
Last changed    : 7/29/2009 5:01:49 PM by Anna
                  (modified after loading)
=====

```

2% IPA @ 230 nm

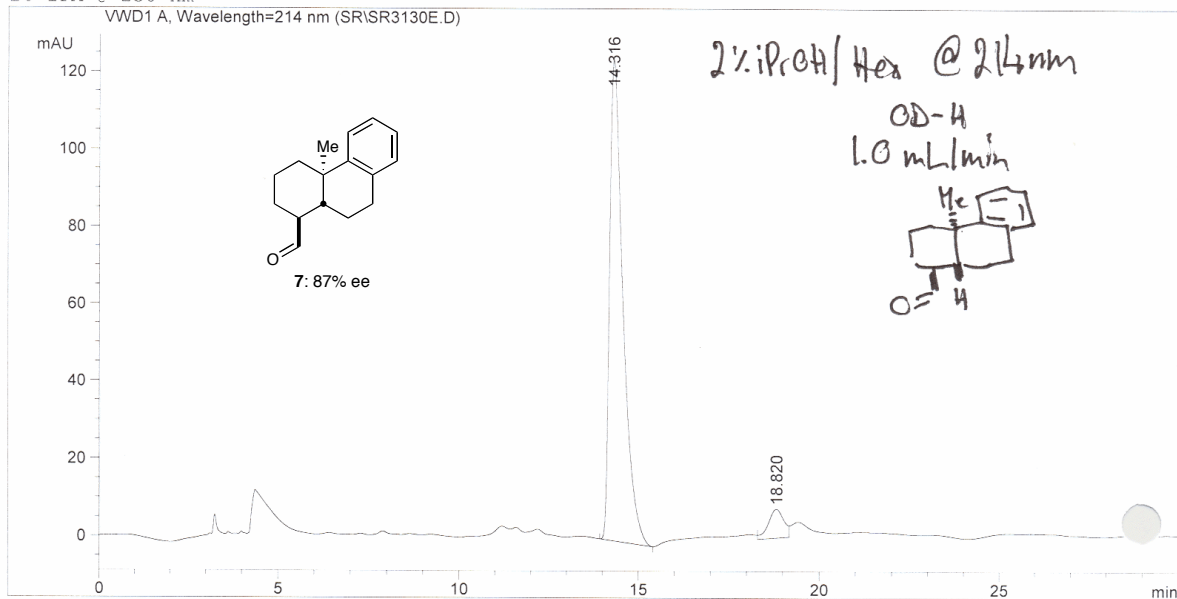

```

=====
Area Percent Report
=====

```

```

Sorted By      :      Signal
Multiplier     :      1.0000
Dilution       :      1.0000
Use Multiplier & Dilution Factor with ISTDs

```

Signal 1: VWD1 A, Wavelength=214 nm

| Peak # | RetTime [min] | Type | Width [min] | Area mAU*s | Height [mAU] | Area %  |
|--------|---------------|------|-------------|------------|--------------|---------|
| 1      | 14.316        | BP   | 0.3863      | 3213.43018 | 124.19868    | 93.4801 |
| 2      | 18.820        | VV   | 0.4465      | 224.12614  | 7.49317      | 6.5199  |

```
Totals :                3437.55632  131.69185
```

Results obtained with enhanced integrator!

```

=====
*** End of Report ***
=====

```



Data File C:\HPCHEM\2\DATA\SR\SR1236B.D

Sample Name: sr-I-236

```

=====
Injection Date : 8/27/2008 4:07:13 AM      Seq. Line : 30
Sample Name    : sr-I-236                  Location  : Vial 71
Acq. Operator  : brian                     Inj      : 1
Acq. Instrument : Instrument 2              Inj Volume : 5 µl
Acq. Method    : C:\HPCHEM\2\METHODS\10IPA30S.M
Last changed   : 8/10/2008 11:43:07 AM by david
Analysis Method : C:\HPCHEM\2\METHODS\6IPA10.M
Last changed   : 8/28/2008 1:27:15 PM
8% IPA 70 min
.75ml/min
=====

```

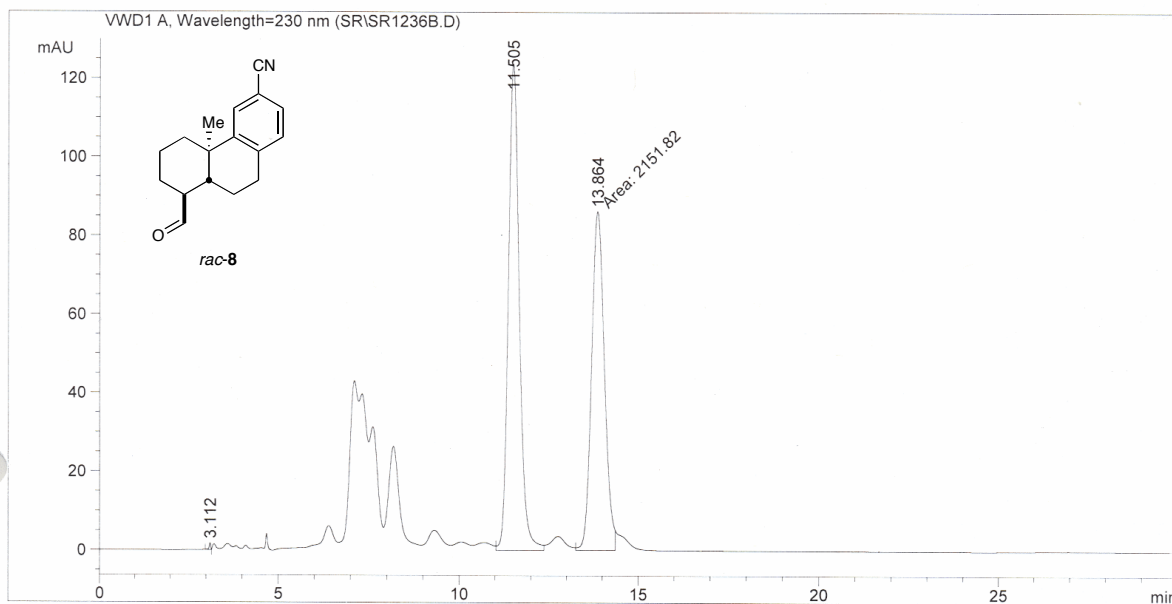

```

=====
Area Percent Report
=====

```

```

Sorted By      :      Signal
Multiplier     :      1.0000
Dilution      :      1.0000
Use Multiplier & Dilution Factor with ISTDs

```

Signal 1: VWD1 A, Wavelength=230 nm

| Peak # | RetTime [min] | Type | Width [min] | Area mAU*s | Height [mAU] | Area %  |
|--------|---------------|------|-------------|------------|--------------|---------|
| 1      | 3.112         | BV   | 0.0455      | 5.02808    | 1.73106      | 0.1051  |
| 2      | 11.505        | VB   | 0.3264      | 2626.49854 | 123.67387    | 54.9092 |
| 3      | 13.864        | MF   | 0.4163      | 2151.82104 | 86.14082     | 44.9857 |

```
Totals :                4783.34766  211.54575
```

Results obtained with enhanced integrator!

```

=====
*** End of Report ***
=====

```

Data File C:\HPCHEM\2\DATA\SR\SR2050A.D

Sample Name: sr-II-050a

```

=====
Injection Date   : 11/3/2008 9:41:29 AM      Seq. Line :    4
Sample Name     : sr-II-050a                Location  : Vial 31
Acq. Operator   : Sebastian                 Inj       :    1
Acq. Instrument : Instrument 2              Inj Volume: 5 µl
Acq. Method     : C:\HPCHEM\2\METHODS\10IPA30S.M
Last changed    : 11/3/2008 8:48:26 AM by jongrock
Analysis Method : C:\HPCHEM\2\METHODS\5IPA40S.M
Last changed    : 11/3/2008 8:50:41 AM by jongrock
5% IPA @ 214 nm

```

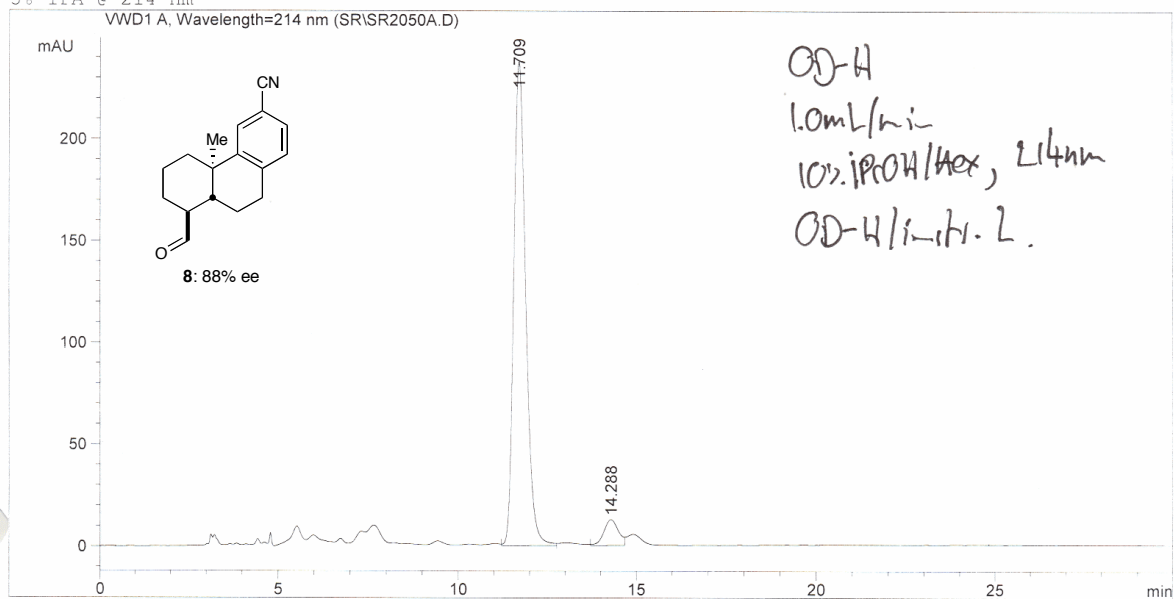

```

=====
Area Percent Report
=====

```

```

Sorted By       : Signal
Multiplier      : 1.0000
Dilution        : 1.0000
Use Multiplier & Dilution Factor with ISTDs

```

Signal 1: VWD1 A, Wavelength=214 nm

| Peak # | RetTime [min] | Type | Width [min] | Area mAU*s | Height [mAU] | Area %  |
|--------|---------------|------|-------------|------------|--------------|---------|
| 1      | 11.709        | VB   | 0.3608      | 5534.14063 | 237.38855    | 93.9081 |
| 2      | 14.288        | VV   | 0.4276      | 359.00363  | 12.69063     | 6.0919  |

```
Totals :                5893.14426  250.07918
```

Results obtained with enhanced integrator!

```

=====
*** End of Report ***

```

Data File C:\HPCHEM\2\DATA\SPS\SR3152E.D

Sample Name: sr-3-152racOJ

```

=====
Injection Date : 7/24/2009 11:53:59 AM      Seq. Line : 5
Sample Name    : sr-3-152racOJ              Location  : Vial 61
Acq. Operator  : Scott                      Inj       : 1
Acq. Instrument : Instrument 2              Inj Volume: 5 µl
Acq. Method    : C:\HPCHEM\2\METHODS\10IPA60S.M
Last changed   : 7/24/2009 9:20:19 AM by Anna
Analysis Method : C:\HPCHEM\2\METHODS\10IPA60S.M
Last changed   : 7/24/2009 10:14:37 AM by Anna
                (modified after loading)
=====

```

10% IPA @ 214 nm

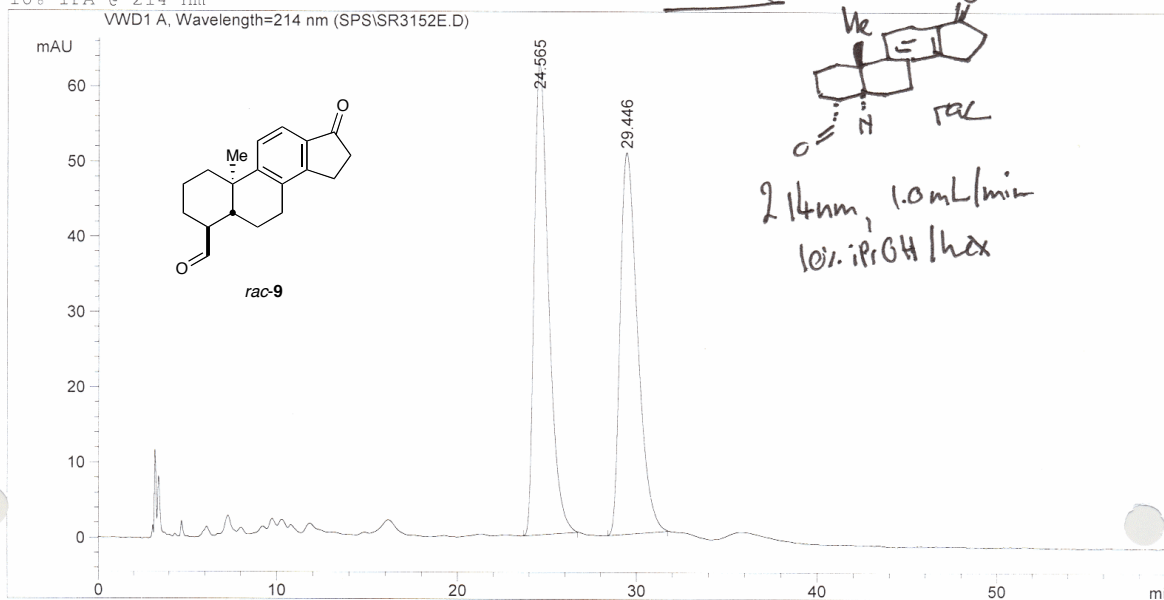

```

=====
Area Percent Report
=====

```

```

Sorted By      : Signal
Multiplier     : 1.0000
Dilution       : 1.0000
Use Multiplier & Dilution Factor with ISTDs

```

Signal 1: VWD1 A, Wavelength=214 nm

| Peak # | RetTime [min] | Type | Width [min] | Area mAU*s | Height [mAU] | Area %  |
|--------|---------------|------|-------------|------------|--------------|---------|
| 1      | 24.565        | BB   | 0.8627      | 3533.97070 | 62.71431     | 50.7147 |
| 2      | 29.446        | PB   | 1.0290      | 3434.36304 | 50.70271     | 49.2853 |

```
Totals :                6968.33374  113.41702
```

Results obtained with enhanced integrator!

```

=====
*** End of Report ***
=====

```

Data File C:\HPCHEM\2\DATA\SR\SR3177A.D

Sample Name: sr-3-177aOJ

```

=====
Injection Date   : 8/5/2009 11:21:34 AM      Seq. Line   :    4
Sample Name     : sr-3-177aOJ              Location    : Vial 64
Acq. Operator   : Sebastian                Inj         :    1
Acq. Instrument : Instrument 2             Inj Volume  : 5 µl
Acq. Method     : C:\HPCHEM\2\METHODS\10IPA60S.M
Last changed    : 7/24/2009 9:20:19 AM by Anna
Analysis Method : C:\HPCHEM\2\METHODS\SCOTT2.M
Last changed    : 8/4/2009 9:53:12 PM by Anna
15% IPA 30min
=====

```

OJ-H, 214 nm, 1.0 mL/min, 0.210 g/hx

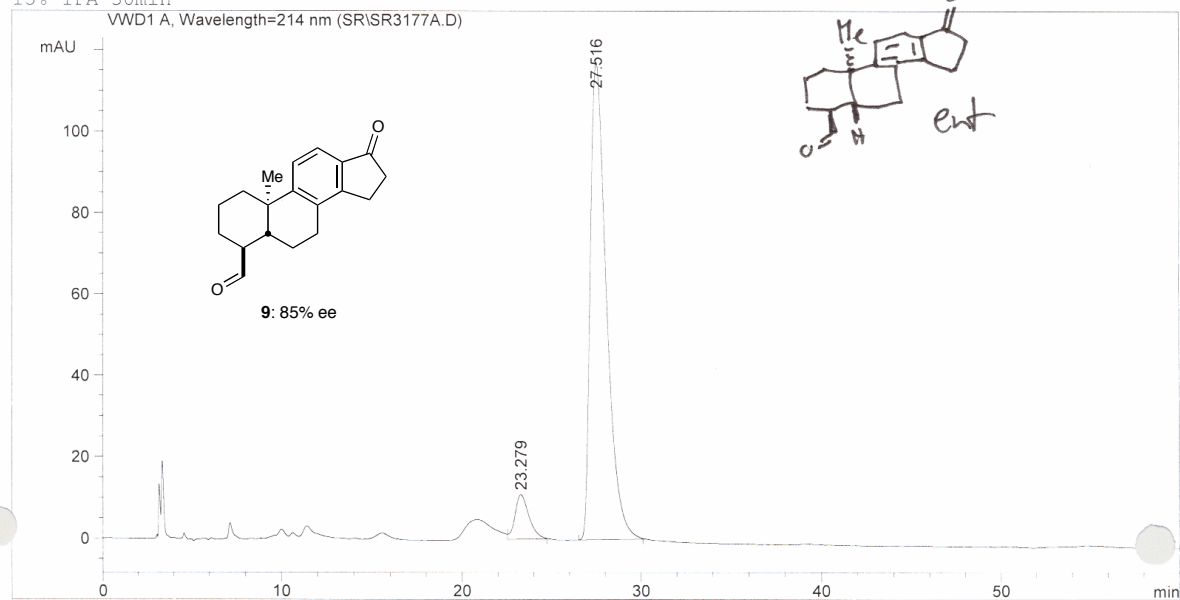

```

=====
Area Percent Report
=====

```

```

Sorted By       : Signal
Multiplier      : 1.0000
Dilution       : 1.0000
Use Multiplier & Dilution Factor with ISTDs

```

Signal 1: VWD1 A, Wavelength=214 nm

| Peak # | RetTime [min] | Type | Width [min] | Area mAU*s | Height [mAU] | Area %  |
|--------|---------------|------|-------------|------------|--------------|---------|
| 1      | 23.279        | VB   | 0.7967      | 590.89819  | 10.95492     | 7.4566  |
| 2      | 27.516        | PB   | 0.9591      | 7333.64893 | 117.36439    | 92.5434 |

```
Totals :                7924.54712  128.31931
```

Results obtained with enhanced integrator!

```

=====
*** End of Report ***
=====

```

Data File C:\HPCHEM\2\DATA\SR\SR3164A.D

Sample Name: sr-3-164F

```

=====
Injection Date   : 7/28/2009 6:35:31 PM      Seq. Line   :    4
Sample Name     : sr-3-164F                 Location    : Vial 24
Acq. Operator   : Sebastian                  Inj         :    1
Acq. Instrument : Instrument 2               Inj Volume  : 5 µl
Acq. Method     : C:\HPCHEM\2\METHODS\2IPA30.M
Last changed    : 7/28/2009 5:49:29 PM by Anna
Analysis Method : C:\HPCHEM\2\METHODS\RG35IP40.M
Last changed    : 9/10/2009 8:11:26 PM by ANNA
                  (modified after loading)
=====

```

0.5% IPA

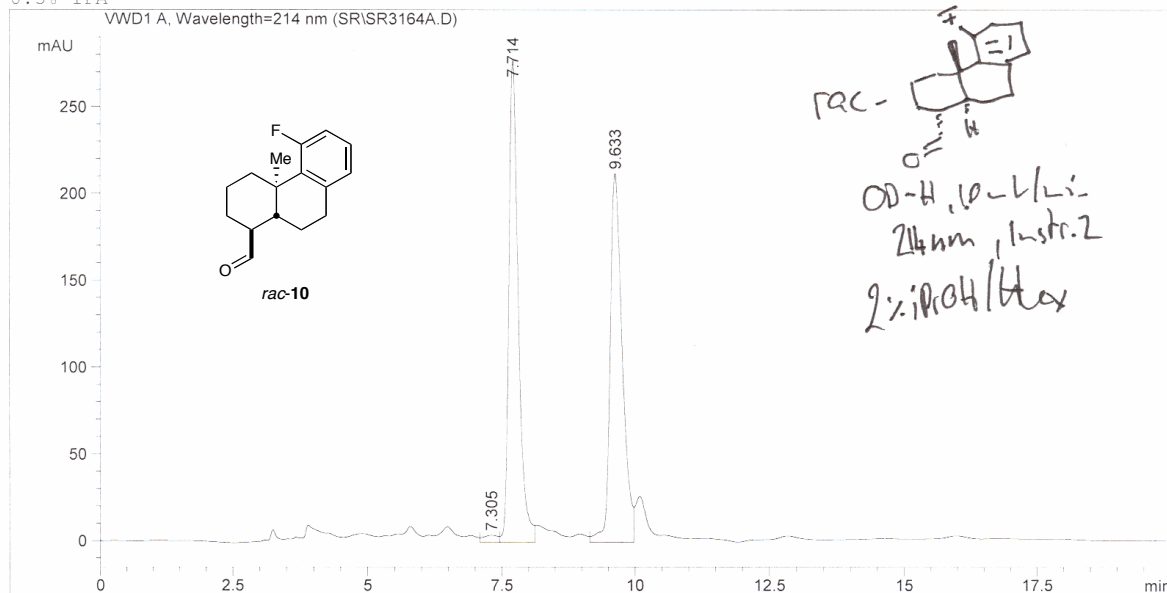

```

=====
Area Percent Report
=====

```

```

Sorted By      :      Signal
Multiplier     :      1.0000
Dilution       :      1.0000
Use Multiplier & Dilution Factor with ISTDs

```

Signal 1: WVD1 A, Wavelength=214 nm

| Peak # | RetTime [min] | Type | Width [min] | Area mAU   | Area *s   | Height [mAU] | Area % |
|--------|---------------|------|-------------|------------|-----------|--------------|--------|
| 1      | 7.305         | VV   | 0.2836      | 79.11993   | 4.14901   | 1.1493       |        |
| 2      | 7.714         | VV   | 0.1881      | 3436.69971 | 277.56833 | 49.9227      |        |
| 3      | 9.633         | VV   | 0.2404      | 3368.21729 | 212.27446 | 48.9279      |        |

```
Totals :                      6884.03693  493.99180
```

Results obtained with enhanced integrator!

```

=====
*** End of Report ***
=====

```

Data File C:\HPCHEM\2\DATA\SR\SR3132A.D

Sample Name: sr-3-132a

```

=====
Injection Date   : 7/3/2009 4:32:07 PM           Seq. Line   :    4
Sample Name     : sr-3-132a                     Location    : Vial 27
Acq. Operator  : Sebastian                       Inj         :    1
Acq. Instrument : Instrument 2                   Inj Volume  : 5 µl
Acq. Method    : C:\HPCHEM\2\METHODS\2IPA30.M
Last changed   : 7/3/2009 3:27:32 PM by Sebastian
Analysis Method : C:\HPCHEM\2\METHODS\RG35IP40.M
Last changed   : 9/10/2009 8:11:26 PM by ANNA
                  (modified after loading)
=====

```

0.5% IPA

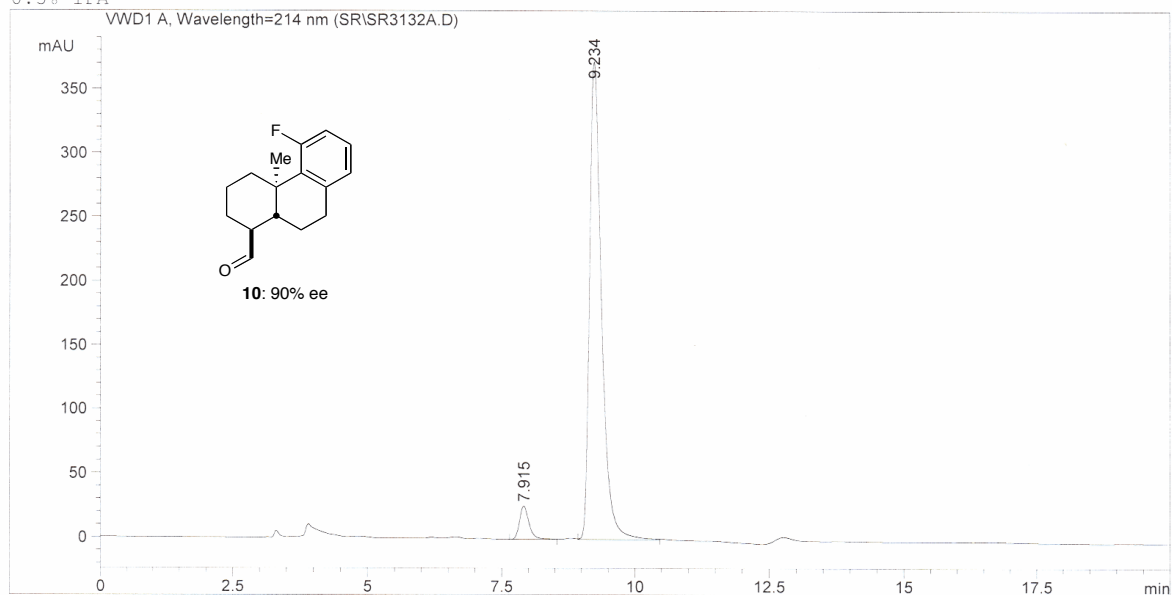

```

=====
                          Area Percent Report
=====

```

```

Sorted By           :      Signal
Multiplier          :      1.0000
Dilution           :      1.0000
Use Multiplier & Dilution Factor with ISTDs

```

Signal 1: VWD1 A, Wavelength=214 nm

| Peak # | RetTime [min] | Type | Width [min] | Area mAU   | Area *s   | Height [mAU] | Area % |
|--------|---------------|------|-------------|------------|-----------|--------------|--------|
| 1      | 7.915         | VB   | 0.1897      | 325.92758  | 26.03340  | 5.3119       |        |
| 2      | 9.234         | VB   | 0.2356      | 5809.82520 | 373.00732 | 94.6881      |        |

```
Totals :                      6135.75278  399.04072
```

Results obtained with enhanced integrator!

```

=====
*** End of Report ***
=====

```

File C:\HPCHEM\2\DATA\SR\SR3205I.D

Sample Name: sr-3-205racAS

```

=====
Injection Date   : 8/24/2009 6:13:30 PM      Seq. Line   :    9
Sample Name     : sr-3-205racAS             Location    : Vial 21
Acq. Operator  : Sebastian                   Inj        :    1
Acq. Instrument : Instrument 2               Inj Volume  : 5 µl
Acq. Method    : C:\HPCHEM\2\METHODS\10IPA50.M
Last changed   : 8/24/2009 3:21:02 PM by jeff
Analysis Method : C:\HPCHEM\2\METHODS\10IPA40.M
Last changed   : 8/24/2009 6:49:00 PM by jeff
10% IPA @ 230 nm
=====

```

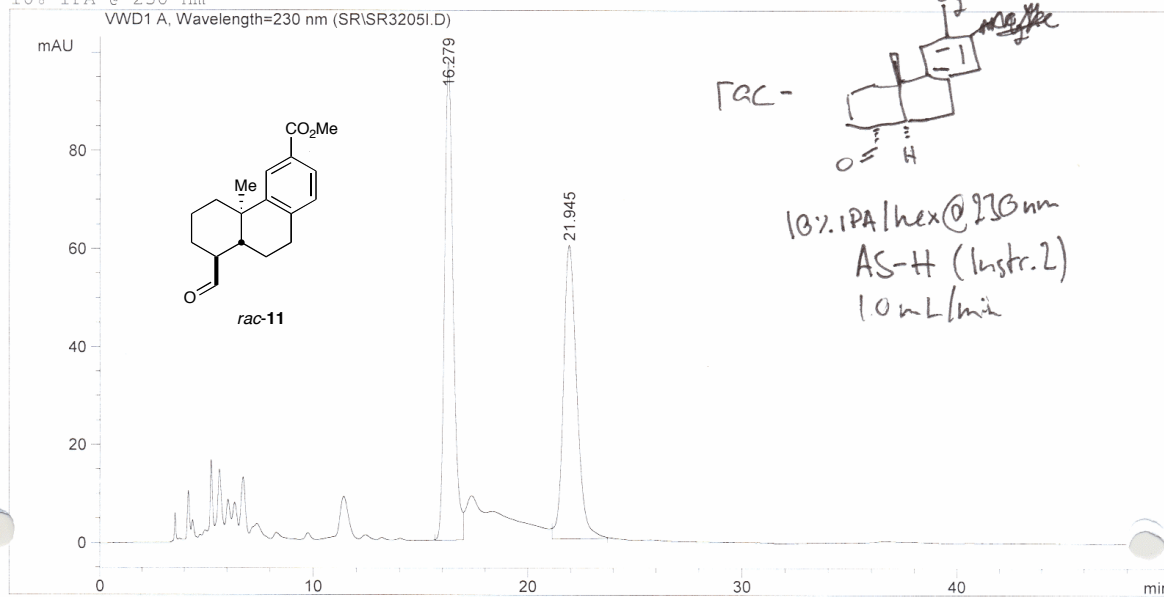

```

=====
Area Percent Report
=====

```

```

Sorted By      : Signal
Multiplier    : 1.0000
Dilution      : 1.0000
Use Multiplier & Dilution Factor with ISTDs

```

Signal 1: VWD1 A, Wavelength=230 nm

| Peak # | RetTime [min] | Type | Width [min] | Area mAU   | Area *s  | Height [mAU] | Area % |
|--------|---------------|------|-------------|------------|----------|--------------|--------|
| 1      | 16.279        | BV   | 0.4299      | 2746.14111 | 97.68849 | 51.3346      |        |
| 2      | 21.945        | BB   | 0.6670      | 2603.34888 | 59.92833 | 48.6654      |        |

```
Totals :                5349.48999  157.61682
```

Results obtained with enhanced integrator!

```

=====
*** End of Report ***
=====

```

Data File C:\HPCHEM\2\DATA\SR\SR3205J.D

Sample Name: sr-3-205entAS

```

=====
Injection Date : 8/24/2009 7:05:08 PM      Seq. Line : 10
Sample Name    : sr-3-205entAS             Location  : Vial 22
Acq. Operator  : Sebastian                  Inj      : 1
Acq. Instrument : Instrument 2              Inj Volume: 5 µl
Method         : C:\HPCHEM\2\METHODS\10IPA40.M
Last changed   : 8/24/2009 6:49:00 PM by jeff
10% IPA @ 230 nm
=====

```

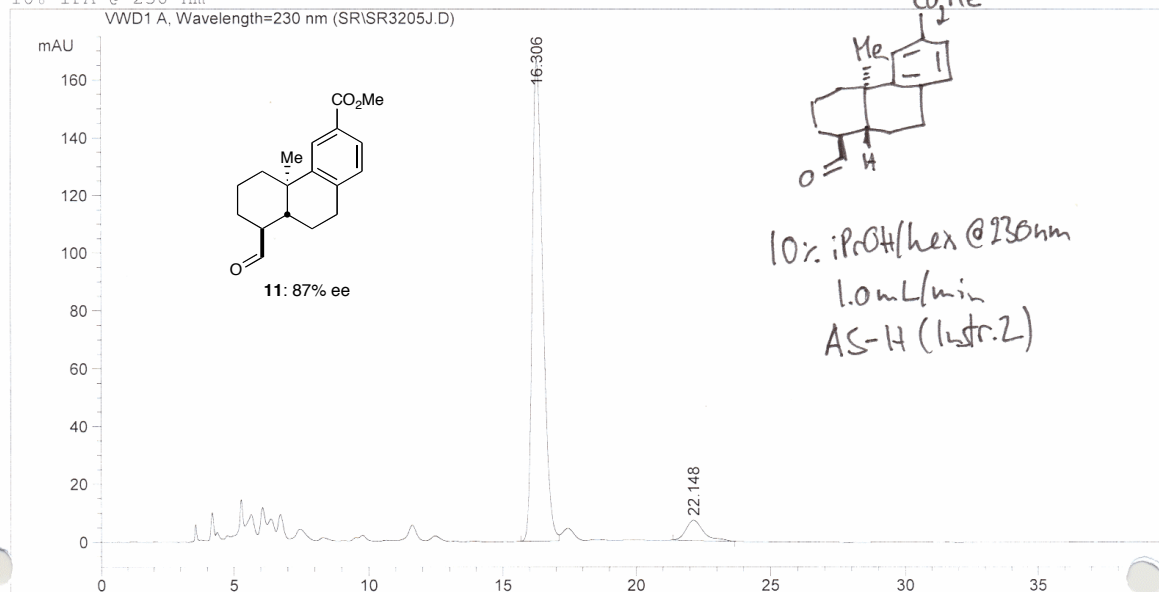

```

=====
Area Percent Report
=====

```

```

Sorted By      :      Signal
Multiplier     :      1.0000
Dilution       :      1.0000
Use Multiplier & Dilution Factor with ISTDs

```

Signal 1: VWD1 A, Wavelength=230 nm

| Peak # | RetTime [min] | Type | Width [min] | Area mAU*s | Height [mAU] | Area %  |
|--------|---------------|------|-------------|------------|--------------|---------|
| 1      | 16.306        | BV   | 0.4276      | 4606.99609 | 166.51863    | 93.5013 |
| 2      | 22.148        | BB   | 0.6811      | 320.20645  | 7.03395      | 6.4987  |

87% ee

```
Totals :                4927.20255  173.55258
```

Results obtained with enhanced integrator!

```

=====
*** End of Report ***
=====

```



File C:\HPCHEM\2\DATA\SR\SR3164D.D

Sample Name: sr-3-164f1

```

=====
Injection Date   : 7/29/2009 6:47:31 PM      Seq. Line   :    6
Sample Name     : sr-3-164f1                Location    : Vial 93
Acq. Operator   : Sebastian                  Inj         :    1
Acq. Instrument : Instrument 2              Inj Volume  : 5 µl
Acq. Method     : C:\HPCHEM\2\METHODS\2IPA40.M
Last changed    : 7/29/2009 5:51:44 PM by Rebecca
Analysis Method : C:\HPCHEM\2\METHODS\2IPA40.M
Last changed    : 7/29/2009 5:01:49 PM by Anna
                  (modified after loading)
=====

```

2% IPA @ 230 nm

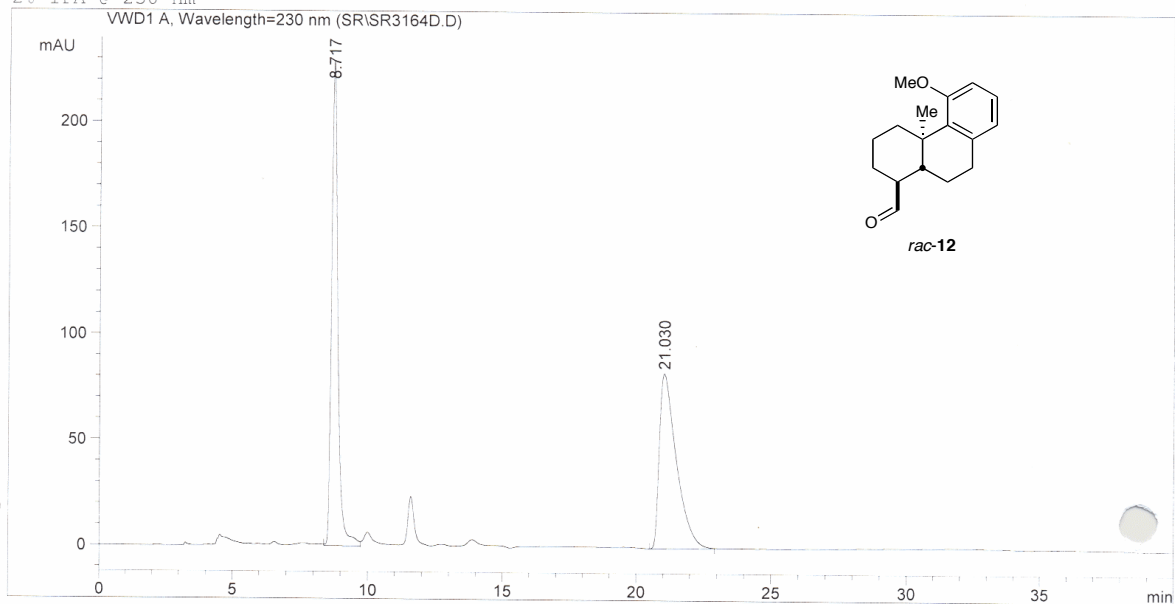

```

=====
Area Percent Report
=====

```

```

Sorted By      :      Signal
Multiplier     :      1.0000
Dilution       :      1.0000
Use Multiplier & Dilution Factor with ISTDs

```

Signal 1: VWD1 A, Wavelength=230 nm

| Peak # | RetTime [min] | Type | Width [min] | Area mAU   | Area *s   | Height [mAU] | Area % |
|--------|---------------|------|-------------|------------|-----------|--------------|--------|
| 1      | 8.717         | VV   | 0.2445      | 3703.87402 | 228.45926 | 50.5355      |        |
| 2      | 21.030        | PB   | 0.6472      | 3625.38330 | 82.64610  | 49.4645      |        |

```
Totals :                7329.25732  311.10536
```

Results obtained with enhanced integrator!

```

=====
*** End of Report ***
=====

```

Data File C:\HPCHEM\2\DATA\SR\SR3130A.D

Sample Name: sr-3-130af1

```

=====
Injection Date : 7/3/2009 10:31:41 AM      Seq. Line : 4
Sample Name    : sr-3-130af1              Location  : Vial 24
Acq. Operator  : Sebastian                Inj      : 1
Acq. Instrument: Instrument 2             Inj Volume: 5 µl
Acq. Method    : C:\HPCHEM\2\METHODS\2IPA40.M
Last changed   : 7/2/2009 5:51:44 PM by Rebecca
Analysis Method: C:\HPCHEM\2\METHODS\WASH10.M
Last changed   : 3/2/2009 2:11:40 PM by Anna
50% IPA wash
=====

```

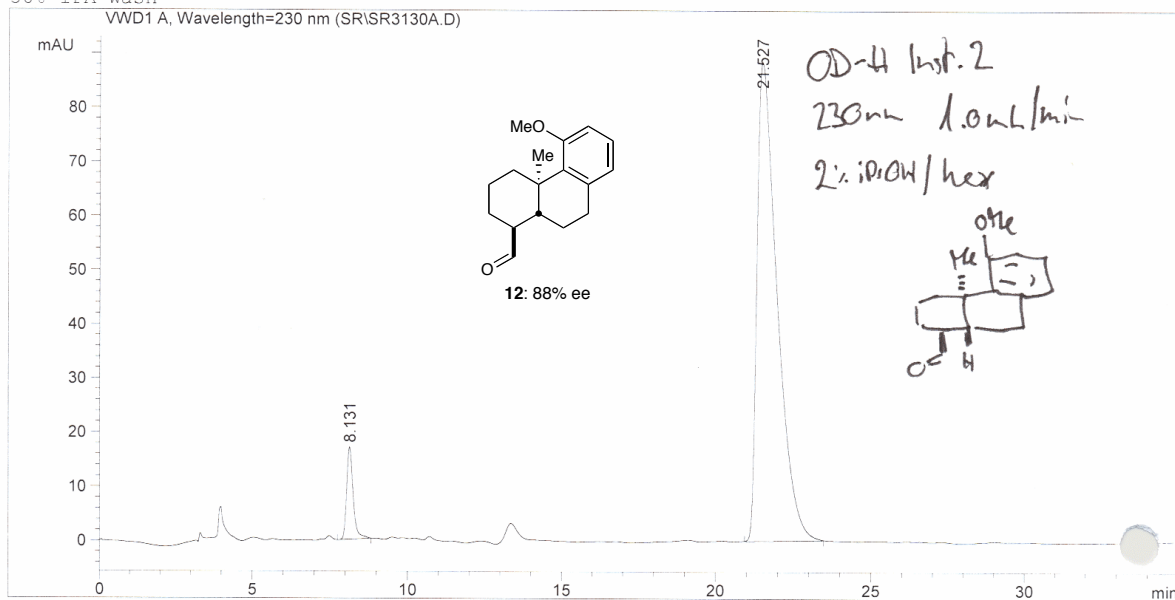

```

=====
Area Percent Report
=====

```

```

Sorted By      : Signal
Multiplier     : 1.0000
Dilution       : 1.0000
Use Multiplier & Dilution Factor with ISTDs

```

Signal 1: VWD1 A, Wavelength=230 nm

| Peak # | RetTime [min] | Type | Width [min] | Area mAU*s | Height [mAU] | Area %  |
|--------|---------------|------|-------------|------------|--------------|---------|
| 1      | 8.131         | VB   | 0.2191      | 245.28796  | 17.01780     | 5.8364  |
| 2      | 21.527        | BB   | 0.6662      | 3957.43018 | 88.44026     | 94.1636 |

88% ee

```
Totals :                4202.71814  105.45806
```

Results obtained with enhanced integrator!

```

=====
*** End of Report ***
=====

```

Data File C:\HPCHEM\2\DATA\SR\SR3164F.D

Sample Name: sr-3-164f2racAS

```

=====
Injection Date   : 8/25/2009 8:26:28 AM      Seq. Line   : 3
Sample Name     : sr-3-164f2racAS           Location    : Vial 11
Acq. Operator   : Sebastian                 Inj         : 1
Acq. Instrument : Instrument 2              Inj Volume  : 5 µl
Acq. Method     : C:\HPCHEM\2\METHODS\2IPA60.M
Last changed    : 8/25/2009 7:51:31 AM by jeff
Analysis Method : C:\HPCHEM\2\METHODS\2IPA60.M
Last changed    : 8/25/2009 10:03:00 AM by jeff
                  (modified after loading)
=====

```

2% IPA @ 230 nm

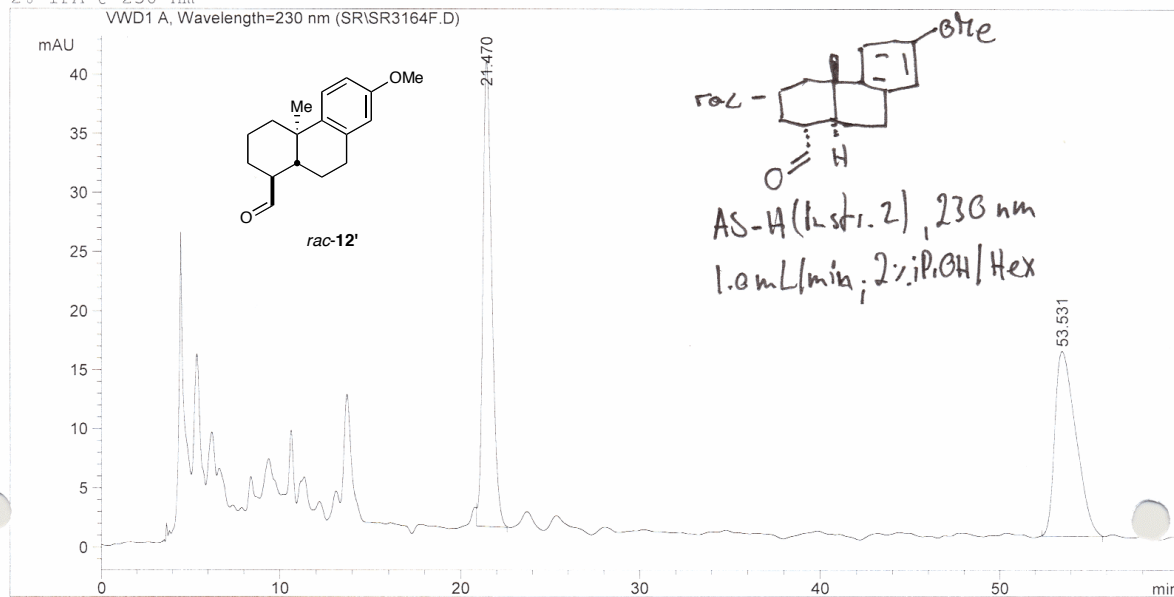

```

=====
Area Percent Report
=====

```

```

Sorted By       : Signal
Multiplier      : 1.0000
Dilution        : 1.0000
Use Multiplier & Dilution Factor with ISTDs

```

Signal 1: VWD1 A, Wavelength=230 nm

| Peak # | RetTime [min] | Type | Width [min] | Area mAU *s | Height [mAU] | Area %  |
|--------|---------------|------|-------------|-------------|--------------|---------|
| 1      | 21.470        | VB   | 0.5340      | 1372.74902  | 39.46352     | 51.4787 |
| 2      | 53.531        | BB   | 1.1968      | 1293.88464  | 15.68596     | 48.5213 |

```
Totals :                2666.63367    55.14948
```

Results obtained with enhanced integrator!

```

=====
*** End of Report ***
=====

```

Data File C:\HPCHEM\2\DATA\SR\SR3130G.D

Sample Name: sr-3-130af2entAS

```

=====
Injection Date : 8/25/2009 11:21:13 AM      Seq. Line : 3
Sample Name    : sr-3-130af2entAS           Location  : Vial 12
Acq. Operator  : Sebastian                  Inj       : 1
Acq. Instrument : Instrument 2              Inj Volume: 5 µl
Acq. Method    : C:\HPCHEM\2\METHODS\2IPA60.M
Last changed   : 8/25/2009 7:51:31 AM by jeff
Analysis Method : C:\HPCHEM\2\METHODS\2IPA60.M
Last changed   : 8/25/2009 10:03:00 AM by jeff
                (modified after loading)
=====

```

2 $\mu$  IPA @ 230 nm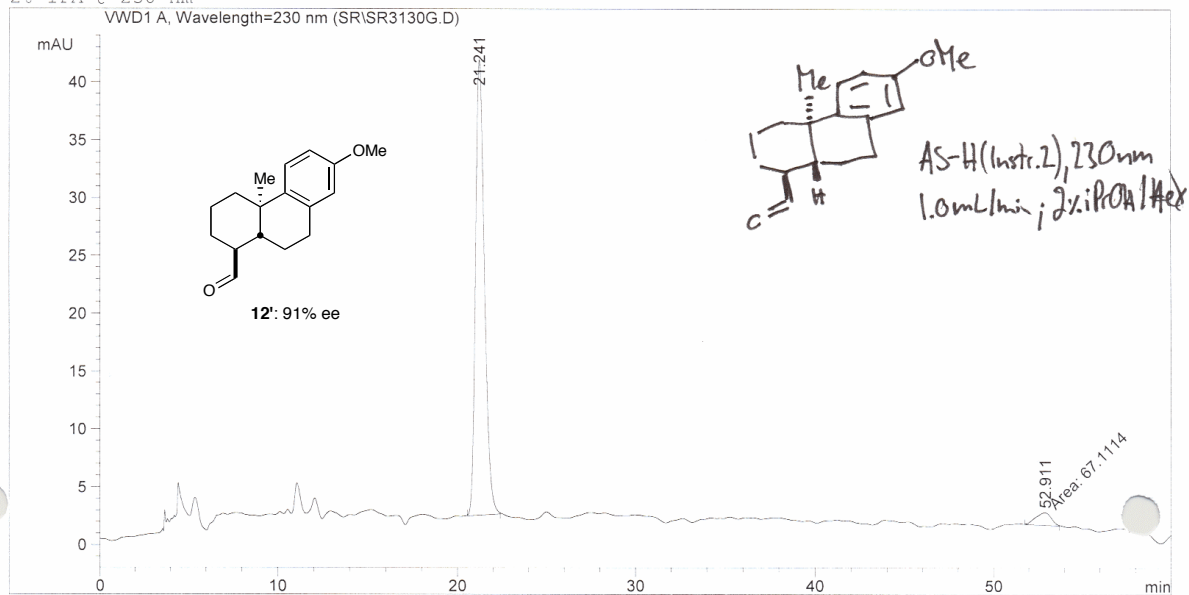

```

=====
Area Percent Report
=====

```

```

Sorted By      : Signal
Multiplier     : 1.0000
Dilution       : 1.0000
Use Multiplier & Dilution Factor with ISTDs

```

Signal 1: VWD1 A, Wavelength=230 nm

| Peak # | RetTime [min] | Type | Width [min] | Area mAU   | Area %  | Height [mAU] |
|--------|---------------|------|-------------|------------|---------|--------------|
| 1      | 21.241        | BB   | 0.5401      | 1369.90479 | 95.3298 | 39.34777     |
| 2      | 52.911        | MM   | 1.0139      | 67.11140   | 4.6702  | 1.10320      |

91% ee

```
Totals :                1437.01618    40.45097
```

Results obtained with enhanced integrator!

```

=====
*** End of Report ***
=====

```

Data File C:\HPCHEM\2\DATA\JVH\SR3068A.D

Sample Name: sr-3-068racOD

```

=====
Injection Date   : 5/15/2009 12:27:53 PM      Seq. Line : 14
Sample Name     : sr-3-068racOD              Location  : Vial 25
Acq. Operator   : Jeff                      Inj       : 1
Acq. Instrument : Instrument 2               Inj Volume: 5 µl
Acq. Method     : C:\HPCHEM\2\METHODS\20IPA40.M
Last changed    : 4/8/2009 9:27:41 AM by nagib
Analysis Method : C:\HPCHEM\2\METHODS\05IPA60W.M
Last changed    : 5/12/2009 11:08:01 PM by nagib
=====

```

Instr. 2, OD-H, 1.0 mL/min, 214 nm

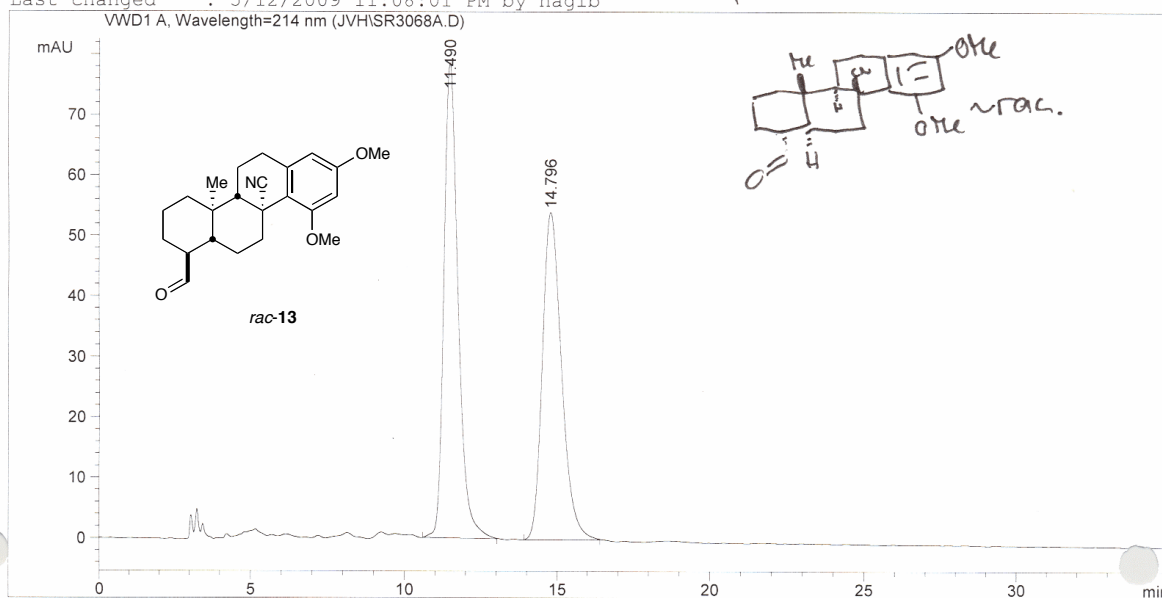

```

=====
Area Percent Report
=====

```

```

Sorted By      :      Signal
Multiplier     :      1.0000
Dilution       :      1.0000
Use Multiplier & Dilution Factor with ISTDs

```

Signal 1: VWD1 A, Wavelength=214 nm

| Peak # | RetTime [min] | Type | Width [min] | Area mAU*s | Height [mAU] | Area %  |
|--------|---------------|------|-------------|------------|--------------|---------|
| 1      | 11.490        | PB   | 0.4939      | 2531.44849 | 78.55261     | 51.6623 |
| 2      | 14.796        | BB   | 0.6796      | 2368.54785 | 54.10532     | 48.3377 |

```
Totals :                4899.99634  132.65793
```

Results obtained with enhanced integrator!

```

=====
*** End of Report ***
=====

```

Data File C:\HPCHEM\2\DATA\SR\SR3177B.D

Sample Name: sr-3-177bOD

```

=====
Injection Date   : 8/5/2009 3:29:45 PM      Seq. Line : 13
Sample Name     : sr-3-177bOD              Location  : Vial 68
Acq. Operator  : Sebastian                  Inj       : 1
Acq. Instrument : Instrument 2              Inj Volume: 5 µl
Acq. Method    : C:\HPCHEM\2\METHODS\20IPA40.M
Last changed   : 4/8/2009 9:27:41 AM by nagib
Analysis Method: C:\HPCHEM\2\METHODS\SCOTT2.M
Last changed   : 8/4/2009 9:53:12 PM by Anna
15% IPA 30min
=====

```

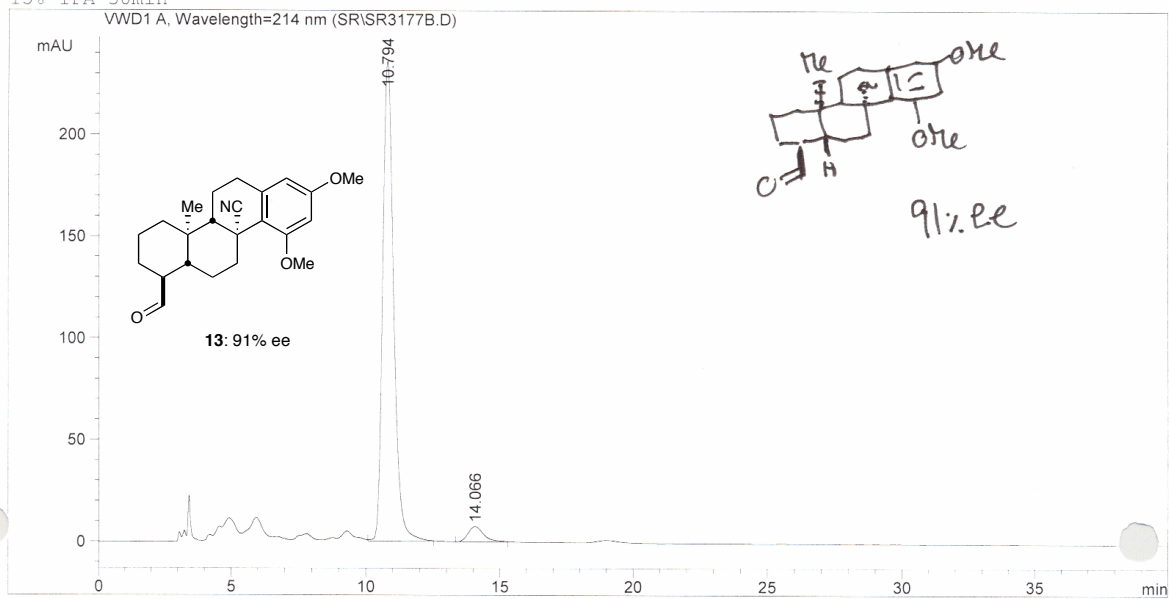

```

=====
Area Percent Report
=====

```

```

Sorted By      : Signal
Multiplier     : 1.0000
Dilution       : 1.0000
Use Multiplier & Dilution Factor with ISTDs

```

Signal 1: VWD1 A, Wavelength=214 nm

| Peak # | RetTime [min] | Type | Width [min] | Area mAU*s | Height [mAU] | Area %  |
|--------|---------------|------|-------------|------------|--------------|---------|
| 1      | 10.794        | VB   | 0.4337      | 6647.33691 | 235.78082    | 95.6737 |
| 2      | 14.066        | BB   | 0.6115      | 300.59076  | 7.48087      | 4.3263  |

```
Totals :                6947.92767  243.26169
```

Results obtained with enhanced integrator!

```

=====
*** End of Report ***
=====

```

Data File C:\HPCHEM\2\DATA\SR\SR3018I.D

Sample Name: sr-3-018racOD

```

=====
Injection Date   : 4/23/2009 4:42:33 PM      Seq. Line : 26
Sample Name     : sr-3-018racOD             Location  : Vial 1
Acq. Operator  : Sebastian                  Inj       : 1
Acq. Instrument : Instrument 2              Inj Volume: 5 µl
Acq. Method    : C:\HPCHEM\2\METHODS\10IPA30S.M
Last changed   : 4/23/2009 1:43:59 PM by Esther
Analysis Method: C:\HPCHEM\2\METHODS\2IPA10.M
Last changed   : 10/21/2007 7:20:53 PM by tjr
5% EtOH wash

```

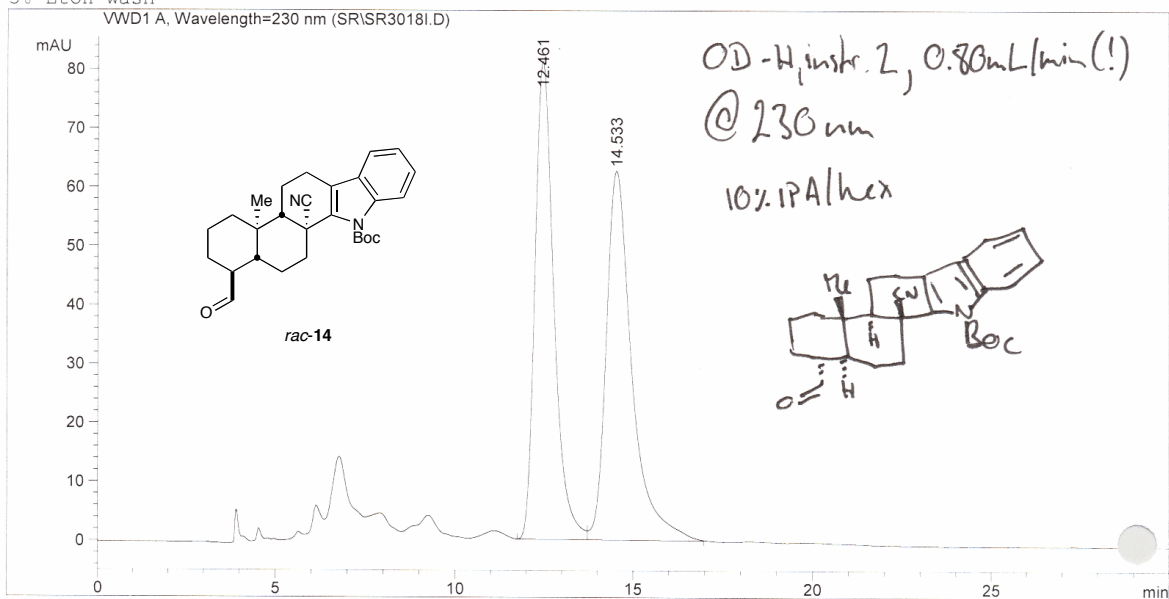

```

=====
Area Percent Report
=====

```

```

Sorted By       : Signal
Multiplier     : 1.0000
Dilution       : 1.0000
Use Multiplier & Dilution Factor with ISTDs

```

Signal 1: VWD1 A, Wavelength=230 nm

| Peak # | RetTime [min] | Type | Width [min] | Area mAU   | Height [mAU] | Area %  |
|--------|---------------|------|-------------|------------|--------------|---------|
| 1      | 12.461        | VB   | 0.5643      | 2998.71802 | 81.01362     | 48.9193 |
| 2      | 14.533        | BB   | 0.7497      | 3131.20703 | 62.58791     | 51.0807 |

```
Totals :                6129.92505  143.60153
```

Results obtained with enhanced integrator!

```

=====
*** End of Report ***
=====

```

Data File C:\HPCHEM\2\DATA\SR\SR3018J.D

Sample Name: sr-3-018entOD

```

=====
Injection Date : 4/23/2009 5:14:11 PM      Seq. Line : 27
Sample Name    : sr-3-018entOD             Location  : Vial 2
Acq. Operator  : Sebastian                 Inj      : 1
Acq. Instrument: Instrument 2              Inj Volume: 5 µl
Acq. Method    : C:\HPCHEM\2\METHODS\10IPA30S.M
Last changed   : 4/23/2009 1:43:59 PM by Esther
Analysis Method: C:\HPCHEM\2\METHODS\2IPA10.M
Last changed   : 10/21/2007 7:20:53 PM by tjr
5% EtOH wash

```

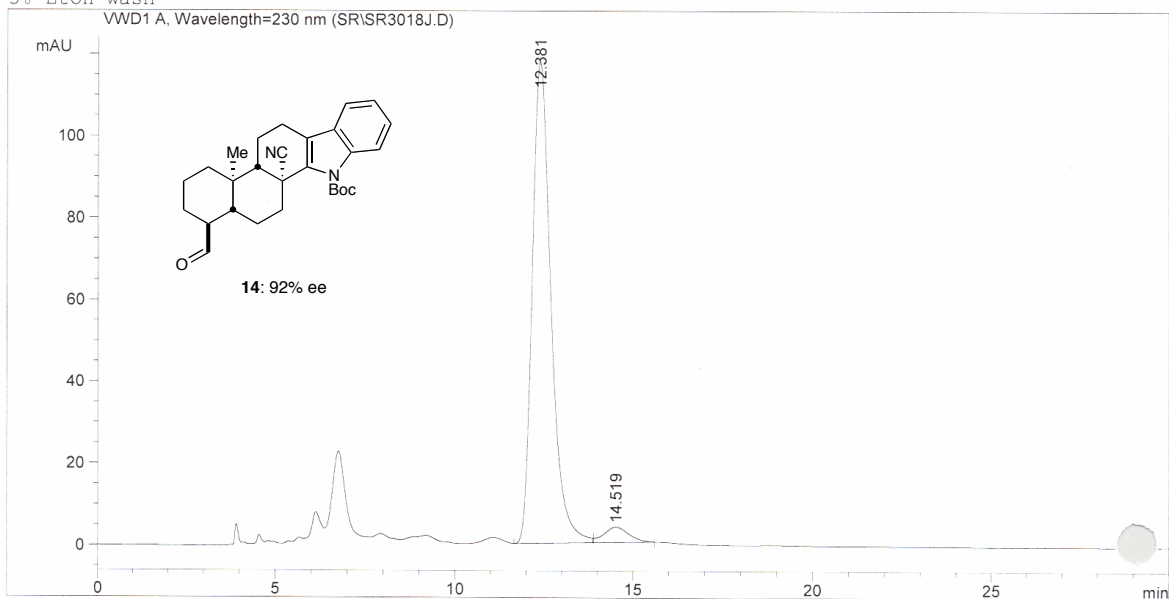

```

=====
Area Percent Report
=====

```

```

Sorted By      : Signal
Multiplier     : 1.0000
Dilution       : 1.0000
Use Multiplier & Dilution Factor with ISTDs

```

Signal 1: VWD1 A, Wavelength=230 nm

| Peak # | RetTime [min] | Type | Width [min] | Area mAU   | Area %  | Height [mAU] |
|--------|---------------|------|-------------|------------|---------|--------------|
| 1      | 12.381        | VB   | 0.5601      | 4306.91846 | 95.9353 | 117.50633    |
| 2      | 14.519        | BB   | 0.6735      | 182.48213  | 4.0647  | 3.74376      |

92% ee

```
Totals :                4489.40059  121.25009
```

Results obtained with enhanced integrator!

```

=====
*** End of Report ***
=====

```



Data File C:\HPCHEM\2\DATA\SR\SR2158A.D

Sample Name: sr-II-158racOD

```

=====
Injection Date : 2/5/2009 9:53:28 PM      Seq. Line : 4
Sample Name    : sr-II-158racOD           Location  : Vial 61
Acq. Operator  : Sebastian                 Inj      : 1
Acq. Instrument : Instrument 2             Inj Volume : 5 µl
Acq. Method    : C:\HPCHEM\2\METHODS\10IPA40.M
Last changed   : 11/3/2008 8:49:24 AM by jongrock
Analysis Method : C:\HPCHEM\2\METHODS\10IPA40.M
Last changed   : 2/5/2009 9:01:29 PM by Esther
                (modified after loading)
    
```

OD-H@214 nm

10% IPA @ 214 nm

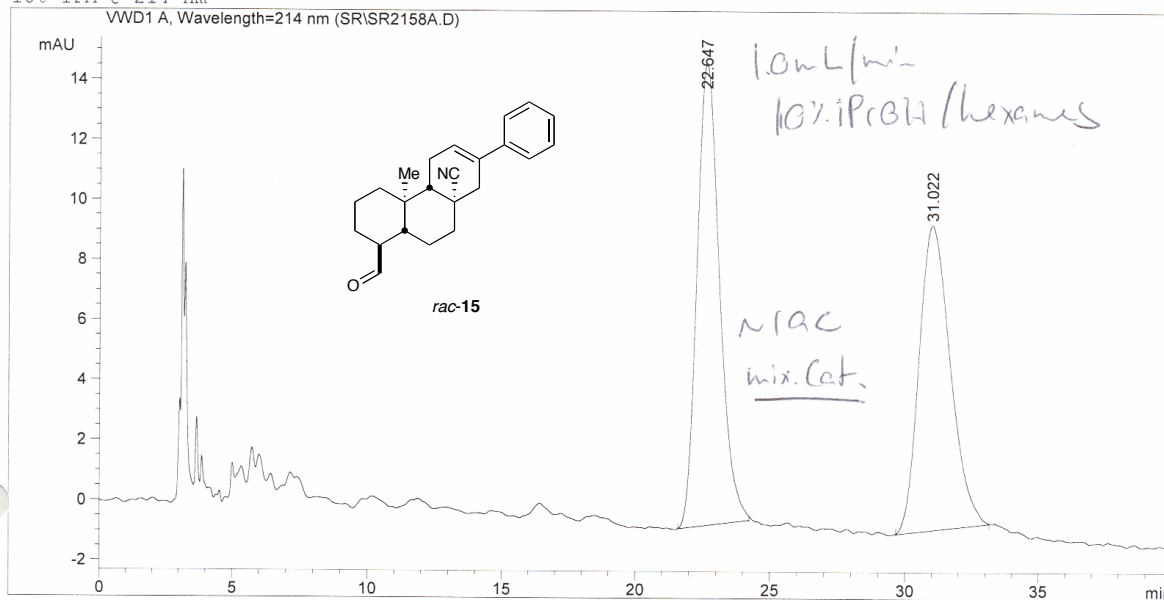

Area Percent Report

```

=====
Sorted By      : Signal
Multiplier    : 1.0000
Dilution      : 1.0000
Use Multiplier & Dilution Factor with ISTDs
    
```

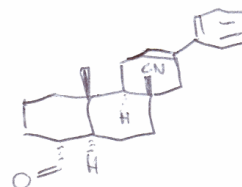

Signal 1: WVD1 A, Wavelength=214 nm

| Peak # | RetTime [min] | Type | Width [min] | Area mAU*s | Height [mAU] | Area %  |
|--------|---------------|------|-------------|------------|--------------|---------|
| 1      | 22.647        | BB   | 0.8865      | 892.01410  | 15.37622     | 52.0197 |
| 2      | 31.022        | BB   | 1.1738      | 822.74817  | 10.12424     | 47.9803 |

Totals : 1714.76227 25.50045

Results obtained with enhanced integrator!

\*\*\* End of Report \*\*\*

Data File C:\HPCHEM\2\DATA\SR\SR2158B.D

Sample Name: sr-II-158entOD

```

=====
Injection Date   : 2/5/2009 10:35:10 PM      Seq. Line :    5
Sample Name     : sr-II-158entOD            Location  : Vial 62
Acq. Operator   : Sebastian                  Inj       :    1
Acq. Instrument : Instrument 2               Inj Volume: 5 µl
Acq. Method     : C:\HPCHEM\2\METHODS\10IPA40.M
Last changed    : 11/3/2008 8:49:24 AM by jongrock
Analysis Method : C:\HPCHEM\2\METHODS\10IPA40W.M
Last changed    : 2/5/2009 10:54:27 PM by Esther
10% IPA @ 230 nm

```

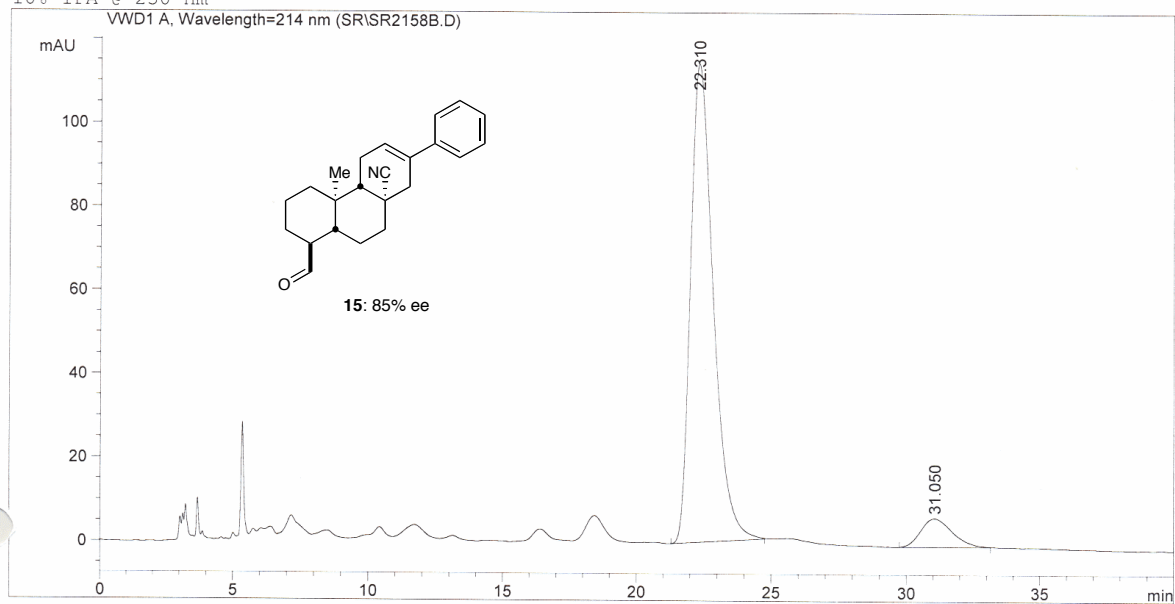

```

=====
                          Area Percent Report
=====

```

```

Sorted By      :      Signal
Multiplier     :      1.0000
Dilution      :      1.0000
Use Multiplier & Dilution Factor with ISTDs

```

Signal 1: VWD1 A, Wavelength=214 nm

| Peak # | RetTime [min] | Type | Width [min] | Area mAU*s | Height [mAU] | Area %  |
|--------|---------------|------|-------------|------------|--------------|---------|
| 1      | 22.310        | PB   | 0.8910      | 6694.11133 | 114.14144    | 92.2438 |
| 2      | 31.050        | BB   | 1.1621      | 562.86835  | 6.85292      | 7.7562  |

*85% ee*

```
Totals :                7256.97968  120.99436
```

Results obtained with enhanced integrator!

```

=====
*** End of Report ***
=====

```

Filename: SR-3-181 RAC file#5

8/8/2009 12:14:10 AM  
Analyst: Administrator  
Method: Default  
Conditions: AD-H(25 x 0.46cm), 60% ethanol(0.1%DEA)/CO<sub>2</sub>, 100 bar, 2.5 mL/min.

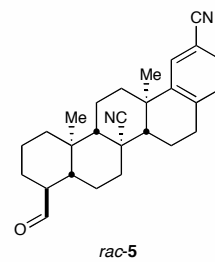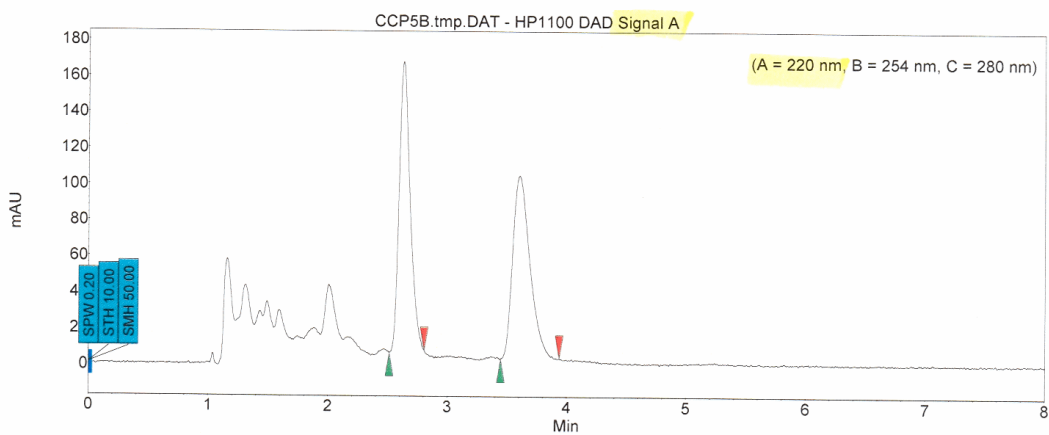

| Index | Time  | Width | Height     | Res. HW | Selectivity | Area           | Area    |
|-------|-------|-------|------------|---------|-------------|----------------|---------|
|       | [Min] | [Min] | [ $\mu$ V] |         |             | [ $\mu$ V.Min] | [%]     |
| 2     | 2.63  | 0.10  | 160.8      | 0.00    | 0.00        | 17.1           | 50.291  |
| 1     | 3.60  | 0.15  | 101.3      | 4.58    | 1.37        | 16.9           | 49.709  |
| Total |       |       | 262.1      |         |             | 34.1           | 100.000 |

Filename: SR-3-181 ENT file#1

8/7/2009 11:56:09 PM  
 Analyst: Administrator  
 Method: Default  
 Conditions: AD-H(25 x 0.46cm), 60% ethanol(0.1%DEA)/CO<sub>2</sub>, 100 bar, 2.5 mL/min.

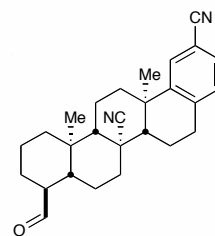

5: 92% ee

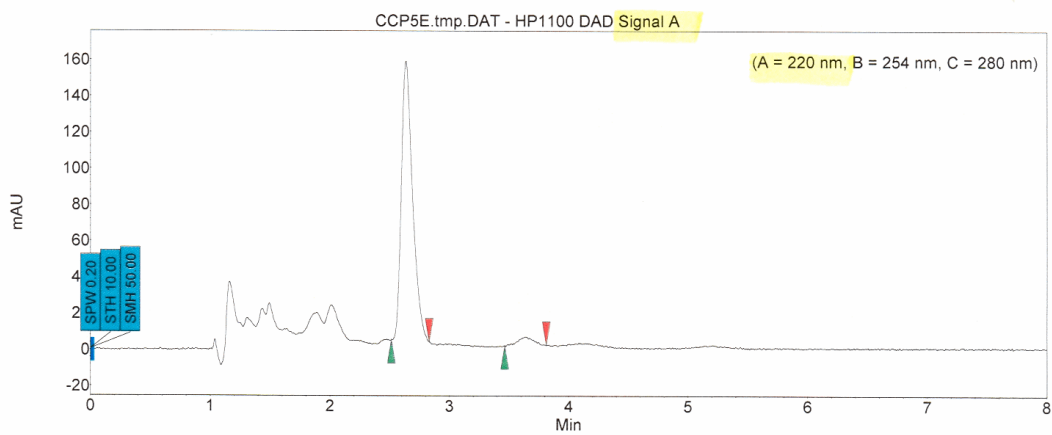

| Index | Time  | Width | Height     | Res. HW | Selectivity | Area           | Area    |
|-------|-------|-------|------------|---------|-------------|----------------|---------|
|       | [Min] | [Min] | [ $\mu$ V] |         |             | [ $\mu$ V.Min] | [%]     |
| 1     | 2.64  | 0.10  | 154.0      | 0.00    | 0.00        | 16.8           | 95.989  |
| 2     | 3.64  | 0.13  | 4.8        | 5.05    | 1.38        | 0.7            | 4.011   |
| Total |       |       | 158.7      |         |             | 17.5           | 100.000 |

Filename: SR-3-182 rac file#0

9/4/2009 11:17:35 AM  
 Analyst: Administrator  
 Method: Default  
 Conditions: IA (25 x 0.46cm), 40% isopropanol (No DEA)/CO<sub>2</sub>, (100 bar), 3ml/min.

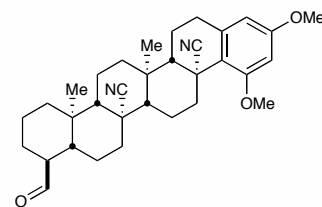*rac-16*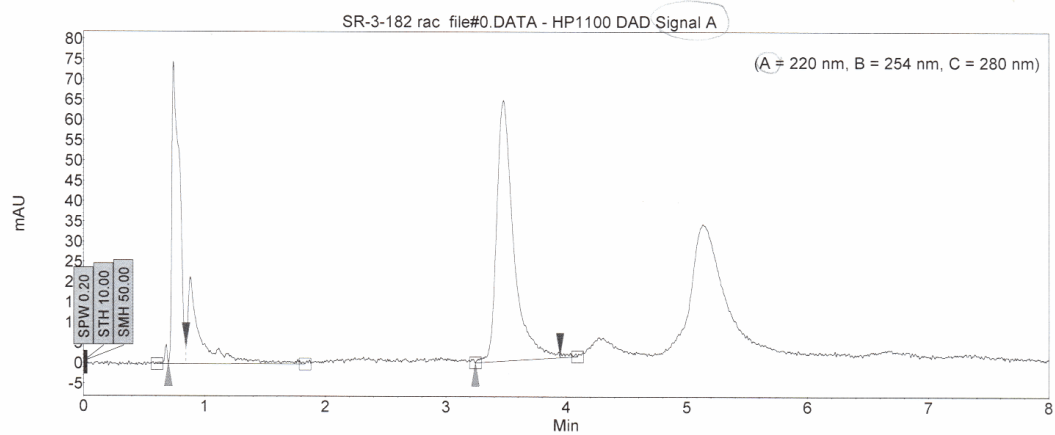

| Index | Time<br>[Min] | Width<br>[Min] | Height<br>[ $\mu$ V] | Res. HW | Selectivity | Area<br>[ $\mu$ V.Min] | Area<br>[%] |
|-------|---------------|----------------|----------------------|---------|-------------|------------------------|-------------|
| 1     | 0.74          | 0.08           | 74.6                 | 0.00    | 0.00        | 5.4                    | 33.792      |
| 2     | 3.48          | 0.14           | 64.3                 | 15.06   | 4.69        | 10.5                   | 66.208      |
| Total |               |                | 138.8                |         |             | 15.9                   | 100.000     |

Filename: SR-3-182 ent file#1

9/4/2009 11:36:07 AM  
 Analyst: Administrator  
 Method: Default  
 Conditions: IA (25 x 0.46cm), 40% isopropanol (No DEA)/CO<sub>2</sub>, (100 bar), 3ml/min.

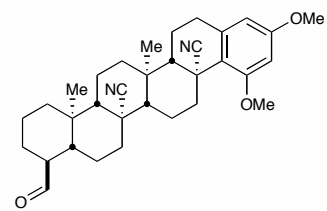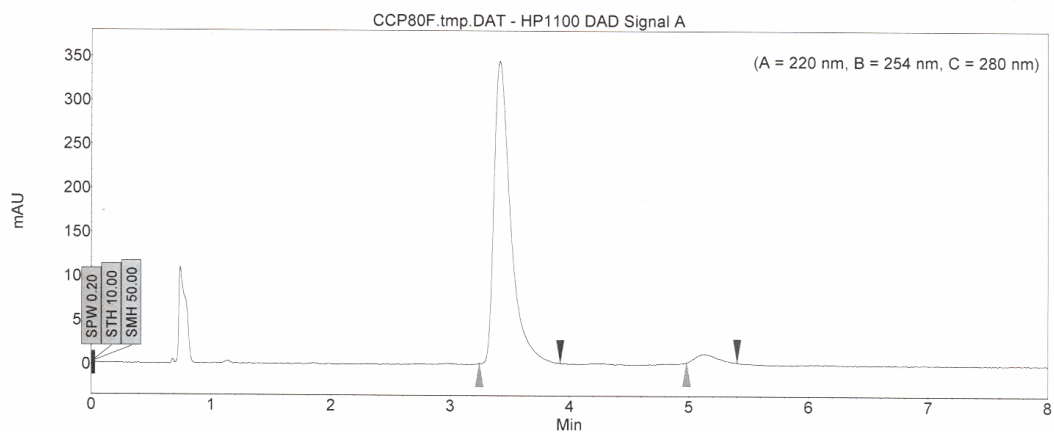

| Index | Time  | Width | Height     | Res. HW | Selectivity | Area           | Area    |
|-------|-------|-------|------------|---------|-------------|----------------|---------|
|       | [Min] | [Min] | [ $\mu$ V] |         |             | [ $\mu$ V.Min] | [%]     |
| 1     | 3.42  | 0.14  | 343.2      | 0.00    | 0.00        | 55.2           | 96.503  |
| 2     | 5.13  | 0.19  | 9.8        | 6.05    | 1.50        | 2.0            | 3.497   |
| Total |       |       | 353.0      |         |             | 57.2           | 100.000 |
